# Supplementary material for: Repurposing a supramolecular iridium catalyst via secondary Zn⋯OC weak interactions between the ligand and substrate leads to ortho -selective C(sp 2 )–H borylation of benzamides with unusual kinetics
Source: Royal Society of Chemistry journal article supplement (doi:10.1039/d4sc01515k), 2024-01-01
Supplement: d4sc01515k1.pdf [file d4sc01515k1.pdf]

# **Repurposing a Supramolecular Iridium Catalyst via Secondary Zn $\cdots$ O=C Weak Interactions between Ligand and Substrate Leads to *ortho*-selective C(sp<sup>2</sup>)-H Borylation of Benzamides with Unusual Kinetics**

Jonathan Trouvé,<sup>[a]</sup> Vanessa Delahaye,<sup>[a]</sup> Michele Tomasini,<sup>[b]</sup> Purushothaman Rajeshwaran,<sup>[a]</sup>  
Thierry Roisnel,<sup>[a]</sup> Albert Poater\*<sup>[b]</sup> and Rafael Gramage-Doria\*<sup>[a]</sup>

[a] Univ Rennes, CNRS, ISCR – UMR 6226, F-35000 Rennes, France

E-mail: rafael.gramage-doria@univ-rennes1.fr

[b] Institut de Química Computacional i Catàlisi, Departament de Química, Universitat de Girona, c/M<sup>a</sup> Aurèlia  
Capmany 69, 17003 Girona, Catalonia, Spain

E-mail: albert.poater@udg.edu

## TABLE OF CONTENTS

|                                                                                |     |
|--------------------------------------------------------------------------------|-----|
| 1. General methods.....                                                        | S3  |
| 2. Synthesis and characterization of the chemicals prepared in this study..... | S4  |
| 3. Catalytic studies.....                                                      | S15 |
| 4. X-ray crystallographic data for ZnTPP $\subset$ DMF.....                    | S21 |
| 5. PM3-minimized molecular modelling.....                                      | S35 |
| 6. Computational details.....                                                  | S48 |
| 7. References.....                                                             | S88 |
| 8. NMR data.....                                                               | S90 |

## 1. General methods.

Solvents were purified with an MB SPS-800 purification system. Pyrrole was dried with  $\text{CaH}_2$  and distilled prior to use.  $\text{CDCl}_3$  was filtered through alumina and stored under argon over molecular sieves. All the other employed chemicals were purchased from commercial sources and used as received. Unless otherwise specified, reactions were carried out under argon atmosphere by employing standard Schlenk and vacuum-line techniques.  $^1\text{H}$  and  $^{13}\text{C}$  NMR spectra were recorded with a Bruker GPX (400 MHz) spectrometer.  $^1\text{H}$  NMR spectra were referenced to residual protiated solvent ( $\delta = 7.26$  ppm for  $\text{CDCl}_3$ ).  $^{13}\text{C}$  NMR spectra were referenced to  $\text{CDCl}_3$  ( $\delta = 77.0$  ppm).<sup>1</sup>  $^{19}\text{F}$  NMR spectra were referenced to external  $\text{CFCl}_3$  ( $\delta = 0$  ppm).<sup>2</sup> Abbreviations for signal couplings are: br, broad; s, singlet; d, doublet; t, triplet; m, multiplet; dd, doublet of doublets; dt, triplet of doublets; td, doublet of triplets; tt, triplet of triplets; tdd, doublet of doublet of triplets. Coupling constants,  $J$ , were reported in hertz unit (Hz). The reactions were monitored by using a Shimadzu 2014 gas chromatograph equipped with an EquityTM-1 Fused Silica capillary column (30 m x 0.25 mm x 0.25  $\mu\text{m}$ ) and an FID detector; conversion and selectivity were determined by using dodecane as internal standard. UV/Vis absorption spectra were recorded with a Specord 205 UV/Vis/NIR spectrophotometer and quartz cuvettes of 1 cm path length. Mass spectroscopy and microanalysis were performed in the laboratories of the Centre Regional de Mesures Physiques de l'Ouest (CRMPO, Université de Rennes 1, Rennes, France). PM3-semiempirical molecular modeling calculations were performed with the Spartan molecular modeling program. The ligands **L1-L6**, and **L1\*-2\*** were prepared as described in the literature.<sup>3</sup>

## 2. Synthesis and characterization of the chemicals prepared in this study.

### Synthesis and characterization of azidopyridines AP:

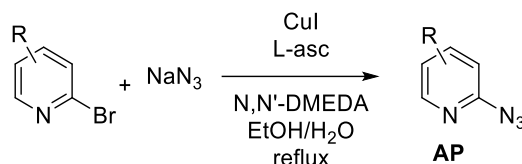

**General procedure for the synthesis of 2-azidopyridine AP:** In a two-necked dried round bottom flask, 2-bromopyridine derivative (1 equiv.), sodium azide (2 equiv.), CuI (0.1 equiv.), sodium ascorbate (0.05 equiv) and *N,N'*-dimethylethylenediamine (0.15 equiv.) were dissolved in a mixture of EtOH:H<sub>2</sub>O (v/v 7:3). The reaction mixture was stirred for 2 hours at reflux under air atmosphere. Then, the mixture was evaporated to dryness. A mixture of EtOAc and H<sub>2</sub>O were added and the aqueous layer was extracted with EtOAc three times. Then the combined organic layers were washed with water two times and once with brine solution. After drying over MgSO<sub>4</sub> and filtration, the solvents were evaporated under reduced pressure. If needed, the product was further purified by column chromatography (SiO<sub>2</sub>, *n*-heptane:EtOAc).

**Important Note:** Azide are sensitive compound that are prone to explosion or decomposition under harsh conditions (high temperature, low pressure...). Careful attention should be taken to prevent any unwanted reactivity as well as safety incident. In the same regard, quenching the remaining aqueous sodium azide at the end of reaction should be carried out for safety and toxicity reason.

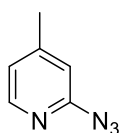

**Synthesis and characterization of 2-azido-4-methylpyridine (AP3):** According to the general procedure, 2-bromo-4-methylpyridine (0.314 mL, 0.485 g, 2.66 mmol, 1equiv.), sodium azide (0.345 g, 5.32 mmol, 2 equiv.), CuI (0.050 g, 0.27 mmol, 0.1 equiv.), sodium ascorbate (0.026 g, 0.13 mmol, 0.05 equiv.) and *N,N'*-dimethylethylenediamine (0.04 mL, 0.033 g, 0.40 mmol, 0.15 equiv.) were dissolved in a mixture of EtOH:H<sub>2</sub>O (12 mL, v/v 7:3). The final product was isolated as an analytically pure white powder (0.362 g, 85% yield). <sup>1</sup>H NMR (400 MHz, CDCl<sub>3</sub>): δ = 8.69 (d, *J* = 7.0 Hz, 1H), 7.77 (dd, *J* = 1.4, 1.1 Hz 1H), 7.03 (dd, *J* = 7.1, 1.4 Hz, 1H), 2.56 (d, *J* = 1.1 Hz, 3H) ppm. <sup>13</sup>C{<sup>1</sup>H} NMR (101 MHz, CDCl<sub>3</sub>): δ = 143.7, 135.5, 124.3, 119.2, 114.0, 21.7 ppm. HRMS (ESI, MeOH/DCM : 95/5): *m/z* calcd for C<sub>6</sub>H<sub>6</sub>N<sub>4</sub> : 157.04847 [M+Na]<sup>+</sup>; found: 157.0486 (1 ppm).

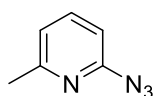

**Synthesis and characterization of 2-azido-6-methylpyridine (AP4):** According to the general procedure, 2-bromo-6-methylpyridine (0.321 mL, 0.485 g, 2.66 mmol, 1 equiv.), sodium azide (0.345 g, 5.32 mmol, 2 equiv.), CuI (0.050 g, 0.27 mmol, 0.1 equiv.), sodium ascorbate (0.026 g, 0.13 mmol, 0.05 equiv.) and *N,N'*-dimethylethylenediamine (0.04 mL, 0.033 g, 0.40 mmol, 0.15 equiv.) were dissolved in a mixture of EtOH:H<sub>2</sub>O (12 mL, v/v 7:3). The final product was isolated as an analytically pure white powder (370 mg, 88% yield). <sup>1</sup>H NMR (400 MHz, CDCl<sub>3</sub>): δ = 7.91 (dt, *J* = 9.1, 1.0 Hz, 1H), 7.60 (dd, *J* = 9.0, 6.8 Hz, 1H), 7.00 (dt, *J* = 6.8, 1.0 Hz, 1H), 2.95 (t, *J* = 1.0 Hz, 3H) ppm. <sup>13</sup>C{<sup>1</sup>H}

NMR (101 MHz, CDCl<sub>3</sub>):  $\delta$  = 152.7, 136.8, 131.7, 115.2, 113.1, 17.4 ppm. HRMS (ESI, DCM):  $m/z$  calcd for C<sub>6</sub>H<sub>7</sub>N<sub>4</sub>: 135.06652 [M+H]<sup>+</sup>; found: 135.0664 (1 ppm). The spectral data match those found in literature.<sup>4</sup>

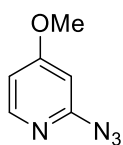

**Synthesis and characterization of 2-azido-4-methoxypyridine (AP5):** According to the general procedure, 2-bromo-4-methoxypyridine (0.324 mL, 0.500 g, 2.66 mmol, 1 equiv.), sodium azide (0.345 g, 5.32 mmol, 2 equiv.), CuI (0.050 g, 0.27 mmol, 0.1 equiv.), sodium ascorbate (0.026 g, 0.13 mmol, 0.05 equiv.) and *N,N'*-dimethylethylenediamine (0.04 mL, 0.033 g, 0.40 mmol, 0.15 equiv.) were dissolved in a mixture of EtOH:H<sub>2</sub>O (12 mL, v/v 7:3). The final product was isolated as an analytically pure white powder (0.390 g, 90% yield). <sup>1</sup>H NMR (400 MHz, CDCl<sub>3</sub>):  $\delta$  = 8.61 (dd,  $J$  = 7.5, 0.6 Hz, 1H), 7.16 (d,  $J$  = 2.4 Hz, 1H), 6.86 (dd,  $J$  = 7.5, 2.4 Hz, 1H), 3.97 (s, 3H) ppm. <sup>13</sup>C{<sup>1</sup>H} NMR (101 MHz, CDCl<sub>3</sub>):  $\delta$  = 162.3, 150.4, 125.4, 112.0, 91.8, 56.4 ppm. HRMS (ESI, MeOH/DCM : 90/10):  $m/z$  calcd for C<sub>6</sub>H<sub>6</sub>N<sub>4</sub>O : 173.04338 [M+Na]<sup>+</sup>; found: 173.0435 (1 ppm). The spectral data match those found in literature.<sup>5</sup>

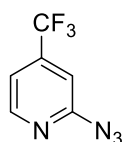

**Synthesis and characterization of 2-azido-4-trifluoromethylpyridine (AP6):** According to the general procedure, 2-bromo-4-trifluoromethylpyridine (0.255 mL, 0.465 g, 2.66 mmol, 1 equiv.), sodium azide (0.345 g, 5.32 mmol, 2 equiv.), CuI (0.050 g, 0.27 mmol, 0.1 equiv.), sodium ascorbate (0.026 g, 0.13 mmol, 0.05 equiv.) and *N,N'*-dimethylethylenediamine (0.04 mL, 0.033 g, 0.40 mmol, 0.15 equiv.) were dissolved in a mixture of EtOH:H<sub>2</sub>O (12 mL, v/v 7:3). The reaction mixture was stirred at reflux for 45 minutes. It is important to note that longer reaction time induce partial to full decomposition of the expected product. The final product was isolated as an analytically pure white powder (0.320 mg, 56% yield). <sup>1</sup>H NMR (400 MHz, CDCl<sub>3</sub>):  $\delta$  = 9.00 (d,  $J$  = 7.2 Hz, 1H), 8.37 (d,  $J$  = 1.7 Hz, 1H), 7.43 (dd,  $J$  = 7.2, 1.7 Hz, 1H) ppm. <sup>13</sup>C{<sup>1</sup>H} NMR (101 MHz, CDCl<sub>3</sub>):  $\delta$  = 147.8, 134.3 (q,  $J$  = 35.2 Hz), 126.9, 121.99 (d,  $J$  = 273.5 Hz), 114.4 (q,  $J$  = 4.8 Hz), 112.8 (q,  $J$  = 2.8 Hz) ppm. <sup>19</sup>F{<sup>1</sup>H} NMR (376 MHz, CDCl<sub>3</sub>):  $\delta$  = -64.3 (s) ppm. HRMS (ESI, DCM):  $m/z$  calcd for C<sub>6</sub>H<sub>3</sub>N<sub>4</sub>F<sub>3</sub>: 211.02020 [M+Na]<sup>+</sup>; found: 211.0203 (0 ppm). The spectral data match those found in literature.<sup>6</sup>

**General procedure for L3\*-L6\* synthesis:** Into a dried Schlenk tube charged with a stirring bar, azidopyridine AP (1 equiv.), Cu(PPh<sub>3</sub>)<sub>3</sub>Br (0.1 equiv.) and dry toluene were added followed by phenylacetylene (1.2 equiv.) addition. The reaction mixture was stirred for 24 hours at 120°C. Back at room temperature, the solvents were evaporated and the crude mixture was purified by column chromatography (SiO<sub>2</sub>, *n*-heptane:EtOAc).

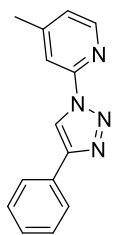

**Synthesis and characterization of ligand L3\*:** According to the general procedure, 2-azido-4-methylpyridine **AP3** (0.228 g, 1.7 mmol, 1 equiv.) and Cu(PPh<sub>3</sub>)<sub>3</sub>Br (0.158 g, 0.17 mmol, 0.1 equiv.) were suspended in dry toluene (12 mL) in a dry Schlenk tube. Then, phenylacetylene (0.208 mg, 0.224 mL, 2 mmol, 1.2 equiv.) was introduced and the reaction mixture was stirred at 120°C immediately for 24 hours. Back at room temperature, the solvent was evaporated under reduced pressure and the crude mixture was purified by column chromatography (SiO<sub>2</sub>, n-heptane:EtOAc, 1:0 to 7:3) to afford **L3\*** (0.145 g, 36% yield). <sup>1</sup>H NMR (400 MHz, CDCl<sub>3</sub>): δ = 8.79 (s, 1H), 8.37 (dd, *J* = 5.1, 0.8 Hz, 1H), 8.08 (dt, *J* = 1.6, 0.8 Hz, 1H), 7.97–7.92 (m, 2H), 7.50–7.44 (m, 2H), 7.40–7.33 (m, 1H), 7.17 (ddd, *J* = 5.1, 1.6, 0.8 Hz, 1H), 2.50 (s, 3H) ppm. <sup>13</sup>C{<sup>1</sup>H} NMR (101 MHz, CDCl<sub>3</sub>): δ = 150.9, 149.3, 148.2, 148.0, 130.3, 128.9, 128.4, 125.9, 124.6, 116.9, 114.4, 21.3 ppm. HRMS (ESI, MeOH/DCM, 95/5): *m/z* calcd for C<sub>14</sub>H<sub>12</sub>N<sub>4</sub>: 259.09542 [M+Na]<sup>+</sup>; found: 259.0955 (0 ppm).

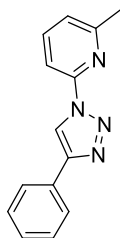

**Synthesis and characterization of Ligand L4\*:** According to the general procedure, 2-azido-6-methylpyridine **AP4** (0.228 g, 1.7 mmol, 1 equiv.) and Cu(PPh<sub>3</sub>)<sub>3</sub>Br (0.158 g, 0.17 mmol, 0.1 equiv.) were suspended in dry toluene (12 mL) in a dry Schlenk tube. Then, phenylacetylene (0.208 mg, 0.224 mL, 2 mmol, 1.2 equiv.) was introduced and the reaction mixture was stirred at 120°C immediately for 24 hours. Back at room temperature, the solvent was evaporated under reduced pressure and the crude mixture was purified by column chromatography (SiO<sub>2</sub>, n-heptane:EtOAc, 1:0 to 7:3) to afford **L4\*** (0.164 g, 41% yield). <sup>1</sup>H NMR (400 MHz, CDCl<sub>3</sub>): δ = 8.82 (s, 1H), 8.03 (d, *J* = 7.9 Hz, 1H), 7.99–7.93 (m, 2H), 7.80 (t, *J* = 7.9 Hz, 1H), 7.50–7.43 (m, 2H), 7.40–7.33 (m, 1H), 7.20 (d, *J* = 7.5 Hz, 1H), 2.62 (s, 3H) ppm. <sup>13</sup>C{<sup>1</sup>H} NMR (101 MHz, CDCl<sub>3</sub>): δ = 158.2, 148.6, 147.8, 139.2, 130.4, 128.9, 128.3, 125.9, 123.0, 116.8, 110.7, 24.2 ppm. HRMS (ESI, MeOH/DCM, 95/5): *m/z* calcd for C<sub>14</sub>H<sub>12</sub>N<sub>4</sub>: 259.09542 [M+Na]<sup>+</sup>; found: 259.0954 (0 ppm).

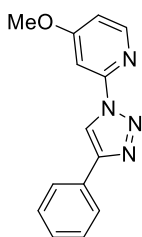

**Synthesis and characterization of ligand L5\*:** According to the general procedure, 2-azido-4-tertbutylpyridine **AP5** (0.255 g, 1.7 mmol, 1 equiv.) and Cu(PPh<sub>3</sub>)<sub>3</sub>Br (0.158 g, 0.17 mmol, 0.1 equiv.) were suspended in dry toluene (12 mL) in a dry Schlenk tube. Then, phenylacetylene (0.208 mg, 0.224 mL, 2 mmol, 1.2 equiv.) was introduced and the reaction mixture was stirred at 120°C immediately for 24 hours. Back at room temperature, the solvent was evaporated under reduced pressure and the crude mixture was purified by column chromatography (SiO<sub>2</sub>, n-heptane:EtOAc, 1:0 to 7:3) to afford **L5\*** (0.192 g, 45% yield). <sup>1</sup>H NMR (400 MHz, CDCl<sub>3</sub>): δ = 8.80 (s, 1H), 8.31 (d, *J* = 5.7 Hz, 1H), 8.03–7.87 (m, 2H), 7.78 (d, *J* = 2.4 Hz, 1H), 7.47 (dd, *J* = 8.4, 6.9 Hz, 2H), 7.43–7.34 (m, 1H), 6.88 (dd, *J* = 5.8, 2.4 Hz, 1H), 3.99 (s, 3H) ppm. <sup>13</sup>C{<sup>1</sup>H} NMR (101 MHz, CDCl<sub>3</sub>): δ = 168.1, 151.0, 149.5, 148.2, 130.4, 129.1, 128.6, 126.0, 117.2, 111.4, 98.9, 56.0 ppm. HRMS (ESI, MeOH/DCM, 95/5): *m/z* calcd for C<sub>14</sub>H<sub>12</sub>N<sub>4</sub>O: 252.10111 [M+Na]<sup>+</sup>; found: 252.1011 (0 ppm).

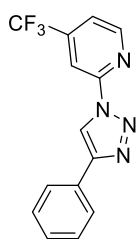

**Synthesis and characterization of Ligand L6\*:** According to the general procedure, 2-azido-4-tertbutylpyridine **AP6** (0.320 g, 1.7 mmol, 1 equiv.) and Cu(PPh<sub>3</sub>)<sub>3</sub>Br (0.158 g, 0.17 mmol, 0.1 equiv.) were suspended in dry toluene (12 mL) in a dry Schlenk tube. Then, phenylacetylene (0.208 mg, 0.224 mL, 2 mmol, 1.2 equiv.) was introduced and the reaction mixture was stirred at 120°C immediately for 24 hours. Back at room temperature, the solvent was evaporated under reduced pressure and the crude mixture was purified by column chromatography (SiO<sub>2</sub>, n-heptane:EtOAc, 1:0 to 7:3) to afford **L6\*** (0.262 g, 53% yield). <sup>1</sup>H NMR (400 MHz, CDCl<sub>3</sub>): δ = 8.82 (s, 1H), 8.72 (d, *J* = 5.2 Hz, 1H), 8.52 (dd, *J* = 1.6, 0.8 Hz, 1H), 7.99–7.93 (m, 2H), 7.58 (d, *J* = 5.2 Hz, 0H), 7.48 (dd, *J* = 8.3, 6.9 Hz, 2H), 7.42–7.37 (m, 1H) ppm. <sup>13</sup>C{<sup>1</sup>H} NMR (101 MHz, CDCl<sub>3</sub>): δ = 149.9, 148.5, 141.5, 129.8, 129.0, 128.7, 126.0, 122.2 (d, *J* = 273.5 Hz), 119.1 (d, *J* = 4.1 Hz), 116.8, 110.2 (d, *J* = 4.0 Hz) ppm. <sup>19</sup>F{<sup>1</sup>H} NMR (376 MHz, CDCl<sub>3</sub>): δ = -64.9 (s) ppm. HRMS (ESI, MeOH/DCM, 95/5): *m/z* calcd for C<sub>14</sub>H<sub>9</sub>N<sub>4</sub>F<sub>3</sub>: 313.06715 [M+Na]<sup>+</sup>; found: 313.0673 (0 ppm).

### Synthesis of non-commercial starting materials 1:

**General method:** To an oven dried round bottom flask was added carboxylic acid (10 mmol, 1 equiv.), DMF (10 mL). Then freshly distilled POCl<sub>3</sub> (1.53 g, 0.930 mL, 10 mmol, 1 equiv.) was slowly added and the reaction mixture was heated to 120°C for 16h. Then the reaction mixture was quench by addition of a saturated solution of NaHCO<sub>3</sub> until no bubbling was noticed. EtOAc was added, and the aqueous layer was extracted 3 times with EtOAc. The combined organic layer was washed with a saturated solution of K<sub>2</sub>CO<sub>3</sub> and then brine solution. After drying over MgSO<sub>4</sub> and filtration, the solvents were evaporated under reduced pressure. The crude mixture was further purified by column chromatography (SiO<sub>2</sub>, n-heptane:EtOAc (1:0 to 2:8)).

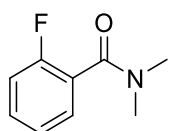

### Synthesis and characterization of 2-fluoro-*N,N'*-dimethylbenzamide (1f):

According to the general method, 2-fluoro-*N,N'*-dimethylbenzamide was isolated as a yellow oil (1.57 g, 94% yield). <sup>1</sup>H NMR (400 MHz, CDCl<sub>3</sub>): δ = 7.40–7.32 (m, 2H), 7.21–7.13 (m, 1H), 7.10–7.03 (m, 1H), 3.11 (q, *J* = 1.3 Hz, 3H), 2.91 (q, *J* = 1.3 Hz, 3H) ppm. <sup>13</sup>C{<sup>1</sup>H} NMR (101 MHz, CDCl<sub>3</sub>): δ = 166.7, 158.2 (d, *J* = 247.5 Hz), 131.1 (d, *J* = 8.0 Hz), 129.0 (d, *J* = 3.9 Hz), 124.7, 124.5 (d, *J* = 3.4 Hz), 115.6 (d, *J* = 21.6 Hz), 38.2 (d, *J* = 2.8 Hz), 34.9 ppm. <sup>19</sup>F{<sup>1</sup>H} NMR (376 MHz, CDCl<sub>3</sub>): δ = -115.3 (s) ppm. The spectral data match those found in literature.<sup>7</sup>

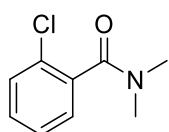

### Synthesis and characterization of 2-chloro-*N,N'*-dimethylbenzamide (1g):

According to the general method, 2-chloro-*N,N'*-dimethylbenzamide was isolated as a yellow oil (1.67 g, 91% yield). <sup>1</sup>H NMR (400 MHz, CDCl<sub>3</sub>): δ = 7.37–7.31 (m, 1H), 7.31–7.22 (m, 3H), 3.09 (d, *J* = 0.9 Hz, 3H), 2.81 (d, *J* = 0.9 Hz, 3H) ppm. <sup>13</sup>C{<sup>1</sup>H} NMR (101 MHz, CDCl<sub>3</sub>): δ = 168.2, 136.2, 130.0, 129.9, 129.3, 127.5, 127.0, 37.8, 34.4 ppm. The spectral data match those found in literature.<sup>8</sup>

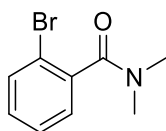

**Synthesis and characterization of 2-bromo-*N,N'*-dimethylbenzamide (1h):**

According to the general method, 2-bromo-*N,N'*-dimethylbenzamide was isolated as a yellow oil (1.98 g, 87% yield).  $^1\text{H}$  NMR (400 MHz,  $\text{CDCl}_3$ ):  $\delta$  = 7.56 (dd,  $J$  = 7.7, 1.0 Hz, 1H), 7.35 (dd,  $J$  = 7.7, 1.0 Hz, 1H), 7.29–7.20 (m, 2H), 3.13 (s, 3H), 2.85 (s, 3H) ppm.  $^{13}\text{C}\{^1\text{H}\}$  NMR (101 MHz,  $\text{CDCl}_3$ ):  $\delta$  = 169.2, 138.6, 132.7, 130.1, 127.7, 127.7, 119.1, 38.2, 34.6 ppm. The spectral data match those found in literature.<sup>9</sup>

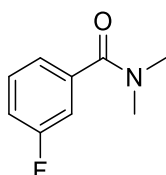

**Synthesis and characterization of 3-fluoro-*N,N'*-dimethylbenzamide (1i):**

According to the general method, 3-methoxy-*N,N'*-dimethylbenzamide was isolated as a yellow oil (1.49 g, 89% yield).  $^1\text{H}$  NMR (400 MHz,  $\text{CDCl}_3$ ):  $\delta$  = 7.36 (td,  $J$  = 7.7, 5.6 Hz, 1H), 7.17 (d,  $J$  = 7.7 Hz, 1H), 7.10 (ddt,  $J$  = 10.9, 8.4, 4.0 Hz, 2H), 3.09 (s, 3H), 2.96 (s, 3H) ppm.  $^{13}\text{C}\{^1\text{H}\}$  NMR (101 MHz,  $\text{CDCl}_3$ ):  $\delta$  = 170.1 (d,  $J$  = 2.4 Hz), 163.7, 161.2, 138.4 (d,  $J$  = 6.9 Hz), 130.1 (d,  $J$  = 8.1 Hz), 122.7 (d,  $J$  = 3.2 Hz), 116.5 (d,  $J$  = 21.1 Hz), 114.3 (d,  $J$  = 22.8 Hz), 39.4, 35.3 ppm.  $^{19}\text{F}\{^1\text{H}\}$  NMR (376 MHz,  $\text{CDCl}_3$ ):  $\delta$  = -112.1 (s) ppm. The spectral data match those found in literature.<sup>10</sup>

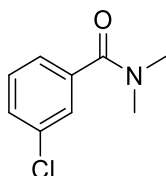

**Synthesis and characterization of 3-chloro-*N,N'*-dimethylbenzamide (1j):**

According to the general method, 3-chloro-*N,N'*-dimethylbenzamide was isolated as a yellow oil (1.76 g, 96% yield).  $^1\text{H}$  NMR (400 MHz,  $\text{CDCl}_3$ ):  $\delta$  = 7.45–7.22 (m, 4H), 3.09 (s, 3H), 2.96 (s, 3H) ppm.  $^{13}\text{C}\{^1\text{H}\}$  NMR (101 MHz,  $\text{CDCl}_3$ ):  $\delta$  = 170.0, 138.1, 134.4, 129.8, 129.6, 127.3, 125.1, 39.5, 35.4 ppm. The spectral data match those found in literature.<sup>10</sup>

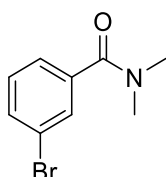

**Synthesis and characterization of 3-bromo-*N,N'*-dimethylbenzamide (1k):**

According to the general method, 3-bromo-*N,N'*-dimethylbenzamide was isolated as a yellow oil (1.84 g, 81% yield).  $^1\text{H}$  NMR (400 MHz,  $\text{CDCl}_3$ ):  $\delta$  = 7.60–7.48 (m, 2H), 7.36–7.23 (m, 2H), 3.09 (s, 3H), 2.96 (s, 3H) ppm.  $^{13}\text{C}\{^1\text{H}\}$  NMR (101 MHz,  $\text{CDCl}_3$ ):  $\delta$  = 169.9, 138.3, 132.6, 130.1, 130.0, 125.6, 122.5, 39.5, 35.4 ppm. The spectral data match those found in literature.<sup>11</sup>

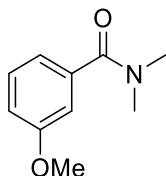

**Synthesis and characterization of 3-methoxy-*N,N'*-dimethylbenzamide (1l):**

According to the general method, 3-methoxy-*N,N'*-dimethylbenzamide was isolated as a yellow oil (1.49 g, 83% yield).  $^1\text{H}$  NMR (400 MHz,  $\text{CDCl}_3$ ):  $\delta$  = 7.30 (t,  $J$  = 7.7 Hz, 1H), 6.99–6.90 (m, 3H), 3.82 (s, 3H), 3.10 (s, 3H), 2.97 (s, 3H) ppm.  $^{13}\text{C}\{^1\text{H}\}$  NMR (101 MHz,  $\text{CDCl}_3$ ):  $\delta$  = 171.4, 159.6, 137.7, 129.43, 119.2, 115.4, 112.4, 55.3, 39.5, 35.3 ppm. The spectral data match those found in literature.<sup>12</sup>

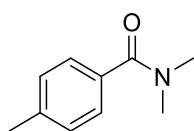

**Synthesis and characterization of 4-methyl-*N,N'*-dimethylbenzamide (1n):**

According to the general method, 4-methyl-*N,N'*-dimethylbenzamide was isolated as a white solid (1.50 g, 92% yield). <sup>1</sup>H NMR (400 MHz, CDCl<sub>3</sub>): δ = 7.34–7.15 (d, *J* = 5.2 Hz, 4H), 3.08 (s, 3H), 2.98 (s, 3H), 2.36 (s, 3H) ppm. <sup>13</sup>C{<sup>1</sup>H} NMR (101 MHz, CDCl<sub>3</sub>): δ = 171.8, 139.6, 133.4, 128.9, 127.2, 39.6, 35.4, 21.4 ppm. The spectral data match those found in literature.<sup>8</sup>

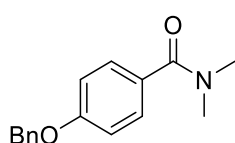

**Synthesis and characterization of 4-(phenylmethoxy)-*N,N'*-dimethylbenzamide (1o):**

According to the general method, 4-(phenylmethoxy)-*N,N'*-dimethylbenzamide was isolated as a white solid (1.58 g, 62% yield). <sup>1</sup>H NMR (400 MHz, CDCl<sub>3</sub>): δ = 7.45–7.29 (m, 7H), 7.00–6.94 (m, 2H), 5.09 (s, 2H), 3.05 (s, 6H) ppm. <sup>13</sup>C{<sup>1</sup>H} NMR (101 MHz, CDCl<sub>3</sub>): δ = 171.4, 159.7, 136.6, 129.1, 128.7, 128.6, 128.0, 127.4, 114.5, 70.0 ppm. The spectral data match those found in literature.<sup>13</sup>

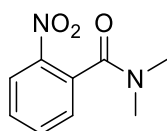

**Synthesis and characterization of 2-nitro-*N,N'*-dimethylbenzamide (1p):**

According to the general method, 2-nitro-*N,N'*-dimethylbenzamide was isolated as a yellow solid (0.99 g, 52% yield). <sup>1</sup>H NMR (400 MHz, CDCl<sub>3</sub>): δ = 8.18 (dd, *J* = 8.3, 1.2 Hz, 1H), 7.70 (td, *J* = 7.5, 1.2 Hz, 1H), 7.55 (td, *J* = 8.3, 7.5, 1.5 Hz, 1H), 7.39 (dd, *J* = 7.5, 1.5 Hz, 1H), 3.16 (s, 3H), 2.83 (s, 3H) ppm. <sup>13</sup>C{<sup>1</sup>H} NMR (101 MHz, CDCl<sub>3</sub>): δ = 167.9, 145.1, 134.5, 133.3, 129.6, 128.1, 124.7, 38.2, 34.9 ppm. The spectral data match those found in literature.<sup>14</sup>

**General method for the borylation catalysis experiment:** To an oven dried round bottom flask was added [Ir(COD)(Cl)]<sub>2</sub> (1.7 mg, 2.43x10<sup>-3</sup> mmol, 0.015 equiv.), ligand **L** (4.86x10<sup>-3</sup> mmol, 0.03 equiv.), B<sub>2</sub>pin<sub>2</sub> (61.7 mg, 0.243 mmol, 1.5 equiv.). Then *p*-xylene (1 mL) and the corresponding benzamide **1** (0.162 mmol, 1 equiv.) and cyclohexene (13 mg, 16 μL, 0.162 mmol, 1 equiv.) were introduced and the reaction mixture was heated at 100 °C during 30 hours. Back at room temperature, the crude mixture was analyzed by GC-MS and evaporated under vacuum until full evaporation of *p*-xylene. Heptane (1 mL) was added and the mixture was filtrated on celite. The solid was washed with heptane and the filtrate was further purified by column chromatography (SiO<sub>2</sub>, n-heptane:EtOAc, v/v 1:0 to 1:1) to afford the pure borylated products **2**.

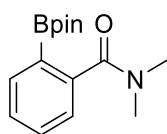

**Synthesis and characterization of 2-(4,4,5,5-tetramethyl-1,3,2-dioxaborolan-2-yl)-*N,N'*-dimethylbenzamide (2a):**

Following the general procedure, *N,N'*-dimethylbenzamide **1a** (24 mg, 0.162 mmol, 1 equiv.) was borylated at 100 °C during 30 hours using cyclohexene (13 mg, 16 μL, 0.162 mmol, 1 equiv.) as a pinacolborane scavenger. A conversion of 99% and a selectivity of 97% toward the *ortho* derivative were detected by GC-MS and GC-FID. The *ortho*-C-H borylated product **2a** was

isolated as a solid (39 mg, 87% yield).  $^1\text{H}$  NMR (400 MHz,  $\text{CDCl}_3$ ):  $\delta$  = 7.81 (dd,  $J$  = 7.5, 1.4 Hz, 1H), 7.46 (td,  $J$  = 7.5, 1.2 Hz, 1H), 7.37 (td,  $J$  = 7.5, 1.2 Hz, 1H), 7.30 (dd,  $J$  = 7.5, 1.2 Hz, 1H), 2.98 (s, 6H), 1.33 (s, 12H) ppm.  $^{13}\text{C}\{^1\text{H}\}$  NMR (101 MHz,  $\text{CDCl}_3$ ):  $\delta$  = 172.5, 142.7, 135.0, 130.9, 128.1, 125.5, 83.6, 24.9 ppm.  $^{11}\text{B}\{^1\text{H}\}$  NMR (128 MHz,  $\text{CDCl}_3$ ):  $\delta$  = 29.6 (s) ppm. The spectral data match those found in literature.<sup>15</sup>

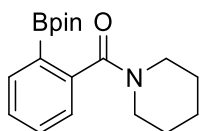

**Synthesis and characterization of 2-(4,4,5,5-tetramethyl-1,3,2-dioxaborolan-2-yl)-benzoylpiperidine (2b):** Following the general procedure **A**, benzoylpiperidine **1b** (31 mg, 0.162 mmol, 1 equiv.) was borylated at 100 °C during 30 hours using cyclohexene (13 mg, 16  $\mu\text{L}$ , 0.162 mmol, 1 equiv.)

as a pinacolborane scavenger. A conversion of 99% and a selectivity of 98% toward the *ortho* derivative were detected by GC-MS and GC-FID. The *ortho*-C-H borylated product **2b** was isolated as a solid (46 mg, 91% yield).  $^1\text{H}$  NMR (400 MHz,  $\text{CDCl}_3$ ):  $\delta$  = 7.82 (dd,  $J$  = 7.5, 1.3 Hz, 1H), 7.45 (td,  $J$  = 7.5, 1.3 Hz, 1H), 7.35 (td,  $J$  = 7.5, 1.3 Hz, 1H), 7.25 (dt,  $J$  = 7.5, 1.3 Hz, 1H), 3.73 (t,  $J$  = 5.4 Hz, 2H), 3.17 (t,  $J$  = 5.4 Hz, 2H), 1.74–1.62 (m, 4H), 1.53–1.46 (m, 2H), 1.34 (s, 12H) ppm.  $^{13}\text{C}\{^1\text{H}\}$  NMR (101 MHz,  $\text{CDCl}_3$ ):  $\delta$  = 170.84, 143.28, 135.41, 130.91, 127.76, 125.42, 83.81, 48.31, 42.61, 25.76, 25.15, 24.94, 24.68 ppm.  $^{11}\text{B}\{^1\text{H}\}$  NMR (128 MHz,  $\text{CDCl}_3$ ):  $\delta$  = 30.32 (s) ppm. The data match those found in the literature.<sup>16</sup>

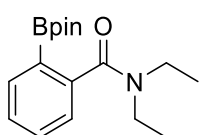

**Synthesis and characterization of 2-(4,4,5,5-tetramethyl-1,3,2-dioxaborolan-2-yl)-N,N'-diethylbenzamide (2c):** Following the general procedure, *N,N'*-diethylbenzamide **1c** (29 mg, 0.162 mmol, 1 equiv.) was borylated at 100 °C during 40 hours using cyclohexene (13 mg, 16  $\mu\text{L}$ , 0.162 mmol, 1 equiv.) as a pinacolborane scavenger. A conversion of 92% and a selectivity of 86% toward the *ortho* derivative were detected by GC-MS and GC-FID. The *ortho*-C-H borylated product **2c** was isolated as a solid (40 mg, 82% yield).

$^1\text{H}$  NMR (400 MHz,  $\text{CDCl}_3$ ):  $\delta$  = 7.80 (dd,  $J$  = 7.5, 1.5 Hz, 1H), 7.41 (td,  $J$  = 7.5, 1.3 Hz, 1H), 7.35 (td,  $J$  = 7.5, 1.3 Hz, 1H), 7.26 (dd,  $J$  = 7.5, 1.3 Hz, 1H), 3.57 (q,  $J$  = 7.1 Hz, 2H), 3.21 (q,  $J$  = 7.1 Hz, 2H), 1.31 (m, 3 H), 1.30 (s, 12H), 1.06 (t,  $J$  = 7.1 Hz, 3H) ppm.  $^{13}\text{C}\{^1\text{H}\}$  NMR (101 MHz,  $\text{CDCl}_3$ ):  $\delta$  = 171.7, 142.4, 135.1, 130.5, 128.2, 125.4, 83.4, 43.0, 39.8, 24.9, 13.7, 12.5 ppm.  $^{11}\text{B}\{^1\text{H}\}$  NMR (128 MHz,  $\text{CDCl}_3$ ):  $\delta$  = 28.35 (s) ppm. The data match those found in the literature.<sup>16</sup>

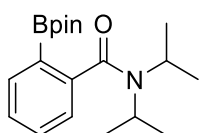

**Synthesis and characterization of 2-(4,4,5,5-tetramethyl-1,3,2-dioxaborolan-2-yl)-N,N'-diisopropylbenzamide (2d):** Following the general procedure, *N,N'*-diisopropylbenzamide **1d** (33 mg, 0.162 mmol, 1 equiv.) was borylated at 100 °C during 48 hours using cyclohexene (13 mg, 16  $\mu\text{L}$ , 0.162 mmol, 1 equiv.) as a pinacolborane scavenger. A conversion of 99% and a selectivity of 77% toward the *ortho* derivative were detected by GC-MS and GC-FID. The *ortho*-C-H borylated product **2d** was isolated as a solid (46 mg, 91% yield).

$^1\text{H}$  NMR (400 MHz,  $\text{CDCl}_3$ ):  $\delta$  = 7.82 (dd,  $J$  = 7.5, 1.3 Hz, 1H), 7.42 (td,  $J$  = 7.5, 1.3 Hz, 1H), 7.34 (td,  $J$  = 7.5, 1.3 Hz, 1H), 7.18 (dt,  $J$  = 7.5, 0.8 Hz, 1H), 3.75 (dt,  $J$  = 13.0, 5.9 Hz, 1H), 3.53 (q,  $J$  = 13.0, 5.9 Hz, 1H), 1.60 (d,  $J$  = 6.8 Hz, 6H),

1.33 (s, 12H), 1.14 (d,  $J = 6.8$  Hz, 6H) ppm.  $^{13}\text{C}\{^1\text{H}\}$  NMR (101 MHz,  $\text{CDCl}_3$ ):  $\delta = 171.3, 145.0, 135.5, 130.5, 127.3, 124.6, 83.8, 50.9, 45.7, 24.9, 20.4, 20.2$  ppm.  $^{11}\text{B}\{^1\text{H}\}$  NMR (128 MHz,  $\text{CDCl}_3$ ):  $\delta = 30.0$  (s) ppm. The data match those found in the literature.<sup>16</sup>

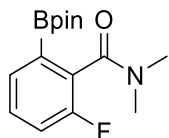

**Synthesis and characterization of 2-(4,4,5,5-tetramethyl-1,3,2-dioxaborolan-2-yl)-6-fluoro-*N,N'*-dimethylbenzamide (2f):** Following the general procedure without cyclohexene, 2-fluoro-*N,N'*-dimethylbenzamide **1f** (27 mg, 0.162 mmol, 1 equiv.) was borylated at 100 °C during 30 hours. A conversion of 99% and a selectivity of 94% toward the *ortho* derivative were detected by GC-MS and GC-FID. The *ortho*-C-H borylated product **2e** was isolated as a solid (46 mg, 91% yield).  $^1\text{H}$  NMR (400 MHz,  $\text{CDCl}_3$ ):  $\delta = 7.60$  (dd,  $J = 7.4, 1.1$  Hz, 1H), 7.39–7.32 (m, 1H), 7.18 (td,  $J = 8.2, 7.4, 1.1$  Hz, 1H), 3.13 (s, 3H), 2.85 (s, 3H), 1.33 (s, 12H) ppm.  $^{13}\text{C}\{^1\text{H}\}$  NMR (101 MHz,  $\text{CDCl}_3$ ):  $\delta = 167.2, 157.8$  (d,  $J = 246.7$  Hz), 131.0 (d,  $J = 3.2$  Hz), 130.3 (d,  $J = 17.9$  Hz), 129.6 (d,  $J = 7.3$  Hz), 118.2 (d,  $J = 21.6$  Hz), 84.0, 38.3, 34.5, 24.8 ppm.  $^{11}\text{B}\{^1\text{H}\}$  NMR (128 MHz,  $\text{CDCl}_3$ ):  $\delta = 30.3$  (s) ppm.  $^{19}\text{F}\{^1\text{H}\}$  NMR (376 MHz,  $\text{CDCl}_3$ ):  $\delta = -117.5$  (s) ppm. The data match those found in the literature.<sup>17</sup>

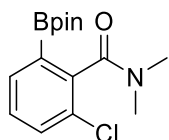

**Synthesis and characterization of 2-(4,4,5,5-tetramethyl-1,3,2-dioxaborolan-2-yl)-6-chloro-*N,N'*-dimethylbenzamide (2g):** Following the general procedure without cyclohexene, 2-chloro-*N,N'*-dimethylbenzamide **1g** (30 mg, 0.162 mmol, 1 equiv.) was borylated at 100 °C during 72 hours. A conversion of 85% and a selectivity of 77% toward the *ortho* derivative were detected by GC-MS and GC-FID. The *ortho*-C-H borylated product **2g** was isolated as a solid (35 mg, 70% yield).  $^1\text{H}$  NMR (400 MHz,  $\text{CDCl}_3$ ):  $\delta = 7.72$  (dd,  $J = 7.4, 1.2$  Hz, 1H), 7.47 (dd,  $J = 8.1, 1.2$  Hz, 1H), 7.30 (t,  $J = 8.1, 7.4$  Hz, 1H), 3.12 (s, 3H), 2.80 (s, 3H), 1.33 (s, 12H) ppm.  $^{13}\text{C}\{^1\text{H}\}$  NMR (101 MHz,  $\text{CDCl}_3$ ):  $\delta = 168.8, 142.0, 133.8, 132.0, 130.2, 128.9, 84.1, 38.1, 34.4, 24.9$  ppm.  $^{11}\text{B}\{^1\text{H}\}$  NMR (128 MHz,  $\text{CDCl}_3$ ):  $\delta = 30.5$  (s) ppm. HRMS (ESI, MeOH/DCM, 95/5):  $m/z$  calcd for  $\text{C}_{15}\text{H}_{21}\text{NO}_3^{35}\text{Cl}^{11}\text{B}$ : 332.11952  $[\text{M}+\text{Na}]^+$ ; found: 332.1198 (1 ppm).

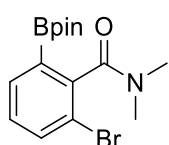

**Synthesis and characterization of 2-(4,4,5,5-tetramethyl-1,3,2-dioxaborolan-2-yl)-6-bromo-*N,N'*-dimethylbenzamide (2h):** Following the general procedure without cyclohexene, 2-bromo-*N,N'*-dimethylbenzamide **1h** (37 mg, 0.162 mmol, 1 equiv.) was borylated at 100 °C during 72 hours. A conversion of 30% was determined by GC-MS and GC-FID. The *ortho*-C-H borylated product **2h** was isolated as a solid (16 mg, 28% yield).  $^1\text{H}$  NMR (400 MHz,  $\text{CDCl}_3$ ):  $\delta = 7.56$  (dd,  $J = 8.1, 1.2$  Hz, 1H), 7.35 (td,  $J = 7.5, 1.2$  Hz, 1H), 7.25–7.19 (m, 1H), 3.13 (s, 3H), 2.85 (s, 3H), 1.25 (s, 12H) ppm.  $^{13}\text{C}\{^1\text{H}\}$  NMR (101 MHz,  $\text{CDCl}_3$ ):  $\delta = 169.2, 138.6, 132.7, 130.2, 127.7, 127.7, 119.1, 83.5, 38.2, 34.7, 25.0$  ppm.  $^{11}\text{B}\{^1\text{H}\}$  NMR (128 MHz,  $\text{CDCl}_3$ ):  $\delta = 30.5$  (s) ppm. The data match those found in the literature.<sup>18</sup>

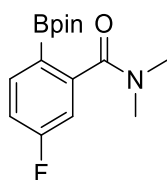

**Synthesis and characterization of 2-(4,4,5,5-tetramethyl-1,3,2-dioxaborolan-2-yl)-5-fluoro-*N,N'*-dimethylbenzamide (2i):** Following the general procedure, 3-fluoro-*N,N'*-dimethylbenzamide **1i** (27 mg, 0.162 mmol, 1 equiv.) was borylated at 100 °C during 30 hours using cyclohexene (13 mg, 16  $\mu$ L, 0.162 mmol, 1 equiv.) as a pinacolborane scavenger. A conversion of 99% and a selectivity of 98% toward the *ortho* derivative were detected by GC-MS and GC-FID. The *ortho*-C-H borylated product **2i** was isolated as a solid (48 mg, 94% yield).  $^1\text{H}$  NMR (400 MHz,  $\text{CDCl}_3$ ):  $\delta$  = 7.56 (dd,  $J$  = 7.3, 1.1 Hz, 1H), 7.35–7.27 (m, 1H), 7.14 (td,  $J$  = 8.3, 7.3, 1.1 Hz, 1H), 3.08 (s, 3H), 2.80 (s, 3H), 1.29 (s, 12H) ppm.  $^{13}\text{C}\{^1\text{H}\}$  NMR (101 MHz,  $\text{CDCl}_3$ ):  $\delta$  = 171.2, 165.9 (d,  $J$  = 248.3 Hz), 142.0, 131.6 (d,  $J$  = 8.4 Hz), 121.7 (d,  $J$  = 3.1 Hz), 117.0 (d,  $J$  = 24.7 Hz), 83.2, 25.0 ppm.  $^{11}\text{B}\{^1\text{H}\}$  NMR (128 MHz,  $\text{CDCl}_3$ ):  $\delta$  = 30.3 (s) ppm.  $^{19}\text{F}\{^1\text{H}\}$  NMR (376 MHz,  $\text{CDCl}_3$ ):  $\delta$  = -102.9 (s) ppm. HRMS (ESI, MeOH/DCM, 95/5):  $m/z$  calcd for  $\text{C}_{15}\text{H}_{21}\text{NO}_3^{19}\text{F}^{11}\text{B}$ : 293.15985  $[\text{M}+\text{Na}]^+$ ; found: 293.1599 (0 ppm).

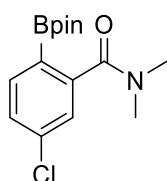

**Synthesis and characterization of 2-(4,4,5,5-tetramethyl-1,3,2-dioxaborolan-2-yl)-5-chloro-*N,N'*-dimethylbenzamide (2j):** Following the general procedure, 3-chloro-*N,N'*-dimethylbenzamide **1j** (30 mg, 0.162 mmol, 1 equiv.) was borylated at 100 °C for 48 hours using cyclohexene (13 mg, 16  $\mu$ L, 0.162 mmol, 1 equiv.) as a pinacolborane scavenger. A conversion of 99% and a selectivity of 90% toward the *ortho* derivative were detected by GC-MS and GC-FID. The *ortho*-C-H borylated product **2j** was isolated as a solid (36 mg, 72% yield).  $^1\text{H}$  NMR (400 MHz,  $\text{CDCl}_3$ ):  $\delta$  = 7.76 (d,  $J$  = 8.0 Hz, 1H), 7.36 (dd,  $J$  = 8.0, 2.0 Hz, 1H), 7.30–7.27 (m, 1H), 3.08 (s, 3H), 2.85 (s, 3H), 1.33 (s, 12H) ppm.  $^{13}\text{C}\{^1\text{H}\}$  NMR (101 MHz,  $\text{CDCl}_3$ ):  $\delta$  = 170.9, 144.7, 137.4, 136.7, 128.2, 125.9, 83.9, 24.9 ppm.  $^{11}\text{B}\{^1\text{H}\}$  NMR (128 MHz,  $\text{CDCl}_3$ ):  $\delta$  = 30.1 (s) ppm. HRMS (ESI, MeOH/DCM, 95/5):  $m/z$  calcd for  $\text{C}_{15}\text{H}_{21}\text{NO}_3^{35}\text{Cl}^{11}\text{B}$ : 332.11952  $[\text{M}+\text{Na}]^+$ ; found: 332.1198 (1 ppm).

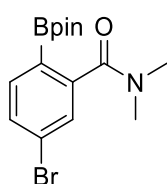

**Synthesis and characterization of 2-(4,4,5,5-tetramethyl-1,3,2-dioxaborolan-2-yl)-5-bromo-*N,N'*-dimethylbenzamide (2k):** Following the general procedure, 3-bromo-*N,N'*-dimethylbenzamide **1k** (37 mg, 0.162 mmol, 1 equiv.) was borylated at 100 °C for 40 hours using cyclohexene (13 mg, 16  $\mu$ L, 0.162 mmol, 1 equiv.) as a pinacolborane scavenger. A conversion of 95% and a selectivity of 87% toward the *ortho* derivative were detected by GC-MS and GC-FID. The *ortho*-C-H borylated product **2k** was isolated as a solid (48 mg, 84% yield).  $^1\text{H}$  NMR (400 MHz,  $\text{CDCl}_3$ ):  $\delta$  = 7.65 (d,  $J$  = 8.0 Hz, 1H), 7.48 (dd,  $J$  = 8.0, 1.8 Hz, 1H), 7.42 (d,  $J$  = 1.8 Hz, 1H), 2.97 (s, 6H), 1.29 (s, 12H) ppm.  $^{13}\text{C}\{^1\text{H}\}$  NMR (101 MHz,  $\text{CDCl}_3$ ):  $\delta$  = 170.7, 144.8, 136.8, 131.1, 128.7, 125.9, 84.0, 24.9 ppm.  $^{11}\text{B}\{^1\text{H}\}$  NMR (128 MHz,  $\text{CDCl}_3$ ):  $\delta$  = 30.4 (s) ppm. The data match those found in the literature.<sup>16</sup>

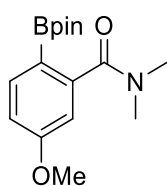

**Synthesis and characterization of (4,4,5,5-tetramethyl-1,3,2-dioxaborolan-2-yl)-5-methoxy-*N,N'*-dimethylbenzamide (2l):** Following the general procedure, 3-methoxy-*N,N'*-dimethylbenzamide **1l** (29 mg, 0.162 mmol, 1 equiv.) was borylated at 100 °C during 40 hours using cyclohexene (13 mg, 16  $\mu$ L, 0.162 mmol, 1 equiv.) as a pinacolborane scavenger. A conversion of 99% and a selectivity of 76% toward the *ortho* derivative were detected by GC-MS and GC-FID. The *ortho*-C-H borylated product **2l** was isolated as a solid (33 mg, 67% yield).  $^1\text{H}$  NMR (400 MHz,  $\text{CDCl}_3$ ):  $\delta$  = 7.74 (d,  $J$  = 8.3 Hz, 1H), 6.86 (dd,  $J$  = 8.3, 2.5 Hz, 1H), 6.79 (d,  $J$  = 2.5 Hz, 1H), 3.81 (s, 3H), 3.06 (s, 3H), 2.78 (s, 3H), 1.29 (s, 12H) ppm.  $^{13}\text{C}\{^1\text{H}\}$  NMR (101 MHz,  $\text{CDCl}_3$ ):  $\delta$  = 172.2, 162.1, 145.3, 137.4, 113.7, 111.1, 83.5, 55.3, 24.9 ppm.  $^{11}\text{B}\{^1\text{H}\}$  NMR (128 MHz,  $\text{CDCl}_3$ ):  $\delta$  = 30.72 (s) ppm. The data match those found in the literature.<sup>17</sup>

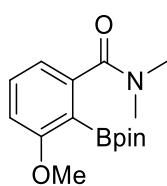

**2-(4,4,5,5-tetramethyl-1,3,2-dioxaborolan-2-yl)-3-methoxy-*N,N'*-dimethylbenzamide (2m):** This *ortho*-C-H borylated isomer product was isolated as a solid (7 mg, 13% yield) during the synthesis of **2l**.  $^1\text{H}$  NMR (400 MHz,  $\text{CDCl}_3$ ):  $\delta$  = 7.34 (t,  $J$  = 8.1 Hz, 1H), 6.99 (dd,  $J$  = 8.1, 0.8 Hz, 1H), 6.89 (d,  $J$  = 8.1 Hz, 1H), 3.83 (s, 3H), 3.10 (s, 6H), 1.37 (s, 12H) ppm.  $^{13}\text{C}\{^1\text{H}\}$  NMR (101 MHz,  $\text{CDCl}_3$ ):  $\delta$  = 172.0, 163.0, 141.0, 130.5, 118.2, 111.5, 83.1, 55.7, 25.0 ppm.  $^{11}\text{B}\{^1\text{H}\}$  NMR (128 MHz,  $\text{CDCl}_3$ ):  $\delta$  = 27.69 (s) ppm. HRMS (ESI, MeOH/DCM, 95/5):  $m/z$  calcd for  $\text{C}_{16}\text{H}_{24}\text{NO}_4^{11}\text{B}$ : 305.17984  $[\text{M}+\text{Na}]^+$ ; found: 305.1798 (0 ppm).

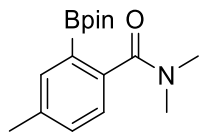

**Synthesis and characterization of 2-(4,4,5,5-tetramethyl-1,3,2-dioxaborolan-2-yl)-4-methyl-*N,N'*-dimethylbenzamide (2n):** Following the general procedure, 4-methyl-*N,N'*-dimethylbenzamide **1n** (26 mg, 0.162 mmol, 1 equiv.) was borylated at 100 °C during 24 hours using cyclohexene (13 mg, 16  $\mu$ L, 0.162 mmol, 1 equiv.) as a pinacolborane scavenger. A conversion of 99% and a selectivity of 97% toward the *ortho* derivative were detected by GC-MS and GC-FID. The *ortho*-C-H borylated product **2n** was isolated as a solid (44 mg, 94% yield).  $^1\text{H}$  NMR (400 MHz,  $\text{CDCl}_3$ ):  $\delta$  = 7.59 (s, 1H), 7.32–7.12 (m, 2H), 2.99 (s, 6H), 2.35 (s, 3H), 1.31 (s, 12H) ppm.  $^{13}\text{C}\{^1\text{H}\}$  NMR (101 MHz,  $\text{CDCl}_3$ ):  $\delta$  = 172.68, 139.13, 138.29, 135.25, 131.31, 125.59, 83.26, 24.98, 21.18.  $^{11}\text{B}\{^1\text{H}\}$  NMR (128 MHz,  $\text{CDCl}_3$ ):  $\delta$  = 28.5 (s) ppm. The data match those found in the literature.<sup>17</sup>

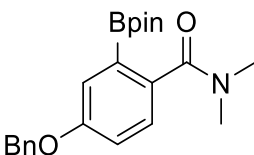

**Synthesis and characterization of 2-(4,4,5,5-tetramethyl-1,3,2-dioxaborolan-2-yl)-4-(phenylmethoxy)-*N,N'*-dimethylbenzamide (2o):** Following the general procedure, 4-(phenylmethoxy)-*N,N'*-dimethylbenzamide **1o** (41 mg, 0.162 mmol, 1 equiv.) was borylated at 100 °C during 48 hours using cyclohexene (13 mg, 16  $\mu$ L, 0.162 mmol, 1 equiv.) as a pinacolborane scavenger. A conversion of 82% and a selectivity of 97% toward the *ortho* derivative were detected by GC-MS and GC-FID. The *ortho*-C-H borylated product **2o** was isolated as a solid (39 mg, 61% yield).  $^1\text{H}$  NMR (400 MHz,  $\text{CDCl}_3$ ):  $\delta$  = 7.49–7.32 (m, 7H), 6.97 (dd,  $J$  = 8.6, 2.6 Hz, 1H), 5.14 (s, 2H), 3.19 (s, 6H), 1.35 (s, 12H) ppm.  $^{13}\text{C}\{^1\text{H}\}$  NMR (101 MHz,

CDCl<sub>3</sub>):  $\delta$  = 172.4, 160.4, 136.7, 130.8, 128.6, 128.0, 127.6, 127.4, 118.3, 116.5, 82.1, 70.0, 38.6, 25.1 ppm. <sup>11</sup>B{<sup>1</sup>H} NMR (128 MHz, CDCl<sub>3</sub>):  $\delta$  = 22.5 (s) ppm. HRMS (ESI, MeOH/DCM, 95/5): *m/z* calcd for C<sub>22</sub>H<sub>28</sub>NO<sub>4</sub><sup>11</sup>B: 381.21114 [M+Na]<sup>+</sup>; found: 381.2112 (1 ppm).

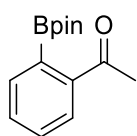

**Synthesis and characterization of 2-(4,4,5,5-tetramethyl-1,3,2-dioxaborolan-2-yl)acetophenone (2p):** Following the general procedure, acetophenone (19 mg, 0.162 mmol, 1 equiv.) was borylated at 80 °C during 24 hours without cyclohexene. A conversion of 55% and a selectivity of 93% toward the *ortho* derivative were detected by GC-MS and GC-FID. The *ortho*-C-H borylated product **7a** was isolated as a solid (20 mg, 49% yield). <sup>1</sup>H NMR (400 MHz, CDCl<sub>3</sub>):  $\delta$  = 7.82 (d, *J* = 7.7 Hz, 1H), 7.55–7.48 (m, 2H), 7.45–7.42 (m, 1H), 2.62 (s, 3H), 1.40 (s, 12H) ppm. <sup>13</sup>C{<sup>1</sup>H} NMR (101 MHz, CDCl<sub>3</sub>):  $\delta$  = 199.9, 140.7, 137.5, 132.6, 132.4, 129.0, 128.5, 83.8, 25.6, 25.0 ppm. <sup>11</sup>B{<sup>1</sup>H} NMR (128 MHz, CDCl<sub>3</sub>):  $\delta$  = 31.6 (s) ppm. The data match those found in the literature.<sup>16</sup>

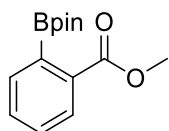

**Synthesis and characterization of 2-(4,4,5,5-tetramethyl-1,3,2-dioxaborolan-2-yl)methylbenzoate (2q):** Following the general procedure, methylbenzoate (22 mg, 0.162 mmol, 1 equiv.) was borylated at 80 °C during 24 hours without cyclohexene. A conversion of 55% and a selectivity of 93% toward the *ortho* derivative were detected by GC-MS and GC-FID. The *ortho*-C-H borylated product **7b** was isolated in as a solid (19 mg, 49% yield). <sup>1</sup>H NMR (400 MHz, CDCl<sub>3</sub>):  $\delta$  = 7.93 (dt, *J* = 7.8, 1.0 Hz, 1H), 7.53–7.48 (m, 2H), 7.45–7.38 (m, 1H), 3.91 (s, 3H), 1.42 (s, 12H) ppm. <sup>11</sup>B{<sup>1</sup>H} NMR (128 MHz, CDCl<sub>3</sub>):  $\delta$  = 30.7 (s) ppm. The data match those found in the literature.<sup>15</sup>

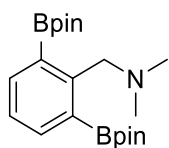

**Synthesis and characterization of 1-(2,6-bis(4,4,5,5-tetramethyl-1,3,2-dioxaborolan-2-yl)phenyl)-N,N-dimethylmethanamine (5):** This compound was obtained during the purification of **2a** (*vide supra*). <sup>1</sup>H NMR (400 MHz, CDCl<sub>3</sub>):  $\delta$  = 7.63 (d, *J* = 7.3 Hz, 2H), 7.20 (t, *J* = 7.3 Hz, 1H), 4.14 (s, 2H), 2.60 (s, 6H), 1.29 (s, 24H) ppm. <sup>11</sup>B{<sup>1</sup>H} NMR (128 MHz, CDCl<sub>3</sub>):  $\delta$  = 22.7 (s) ppm. The data match those found in the literature.<sup>18</sup>

### 3. Catalytic studies.

#### Optimization of ligand and kinetic enhancement effect evidence:

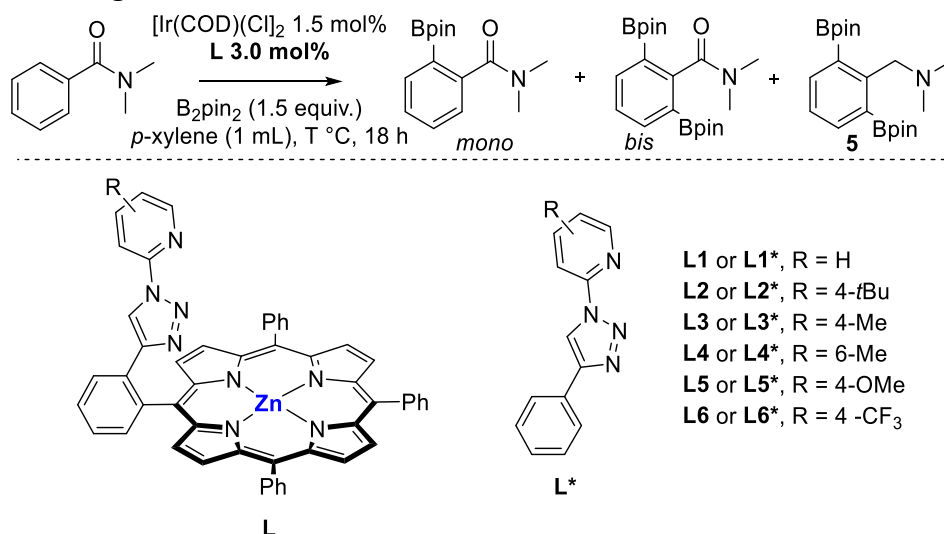

**Table S1.** Optimization of ligand choice and kinetic enhancement evidence.

| Entry | L   | T(°C) | Conversion (%)    | Mono (%) | Bis (%) | 5 (%)  | Ortho selectivity (%) |
|-------|-----|-------|-------------------|----------|---------|--------|-----------------------|
| 1     | L1  | 80    | 83                | 64       | 15      | <5     | 96                    |
| 2     | L2  | 80    | 26                | 22       | 2       | -      | 90                    |
| 3     | L3  | 80    | 50                | 37       | 13      | Traces | 90                    |
| 4     | L4  | 80    | 83                | 73       | 8       | <5     | 97                    |
| 5     | L5  | 80    | 50                | 38       | 12      | Traces | 92                    |
| 6     | L6  | 80    | 41                | 30       | 11      | Traces | 91                    |
| 7     | L1* | 80    | 39                | 33       | 6       | Traces | 95                    |
| 8     | L2* | 80    | 7                 | 6.7      | 0.3     | -      | 96                    |
| 9     | L3* | 80    | 7.4               | 5        | 2.4     | -      | 90                    |
| 10    | L4* | 80    | 52                | 46       | 6       | <5     | 95                    |
| 11    | L5* | 80    | 25                | 22       | 3       | traces | 93                    |
| 12    | L6* | 80    | 15                | 12       | 3       | -      | 89                    |
| 13    | L1  | 100   | 89                | 60       | 10      | 19     | 97                    |
| 14    | L1* | 100   | 73                | 56       | 4       | 13     | 94                    |
| 15    | L1  | 120   | 85 <sup>[a]</sup> | 53       | 8       | 24     | 95                    |
| 16    | L1* | 120   | 73                | 47       | 6       | 20     | 94                    |

<sup>[a]</sup> Full conversion of B<sub>2</sub>pin<sub>2</sub>, >30% estimated yield of mixture of borylated p-xylene.

## Kinetic isotope effect study.

### Reactions in parallel:

**General procedure:**  $[\text{Ir}(\text{COD})(\text{Cl})]_2$ , ligand **L1**,  $\text{B}_2\text{pin}_2$ , and dodecane (0.25 eq.) and  $N,N'$ -dimethylbenzamide derivative were introduced in an oven dried Schlenk flask. *p*-xylene was added and the reaction mixture was stirred at 100 °C. Small aliquots were taken from the flask under argon flow every 1 hour using a dry pipette. Conversion and yield were estimated by GC-MS/GC-FID using dodecane as the internal standard. Fitting of the experimental data was done using sigmoidal Boltzmann function.

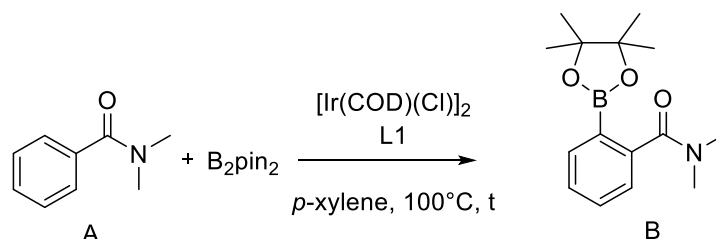

**Reaction at standard conditions with ligand L1.** Following the general procedure,  $[\text{Ir}(\text{COD})(\text{Cl})]_2$  (16.5 mg,  $2.43 \times 10^{-5}$  mol, 0.015 eq.), ligand **L1** (41 mg,  $4.86 \times 10^{-5}$  mol, 0.03 eq.),  $\text{B}_2\text{pin}_2$  (617 mg,  $2.43 \times 10^{-3}$  mol, 1.5 eq.) and  $N,N'$ -dimethylbenzamide (242 mg,  $1.62 \times 10^{-3}$  mol, 1 eq.) were dissolved in *p*-xylene (10 mL). The reaction mixture was stirred at 100 °C for 10 hours. Formation of *ortho*-borylated product [B1] versus time (h) is plotted below (fitted values are shown in red, and experimental values are shown in black squares highlighting the error of the measurement):

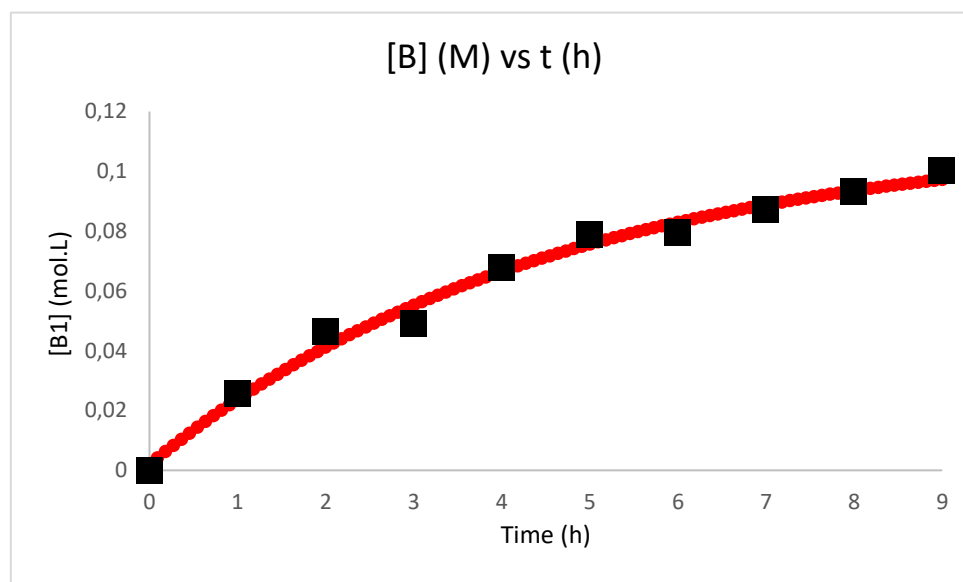

**Reaction at standard conditions with ligand L1.** Following the general procedure,  $[\text{Ir}(\text{COD})(\text{Cl})]_2$  (16.5 mg,  $2.43 \times 10^{-5}$  mol, 0.015 eq.), ligand **L1** (41 mg,  $4.86 \times 10^{-5}$  mol, 0.03 eq.),  $\text{B}_2\text{pin}_2$  (617 mg,  $2.43 \times 10^{-3}$  mol, 1.5 eq.) and 2,3,4,5,6- $\text{D}_5$ - $N,N'$ -dimethylbenzamide (250 mg,  $1.62 \times 10^{-3}$  mol, 1 eq.) were dissolved in *p*-xylene (10 mL). The reaction mixture was stirred at 100 °C for 10 hours. Formation of *ortho*-borylated product [B- $\text{d}_5$ ] versus time (h) is plotted below (fitted values are shown in blue, and experimental values are shown in red squares highlighting the error of the measurement):

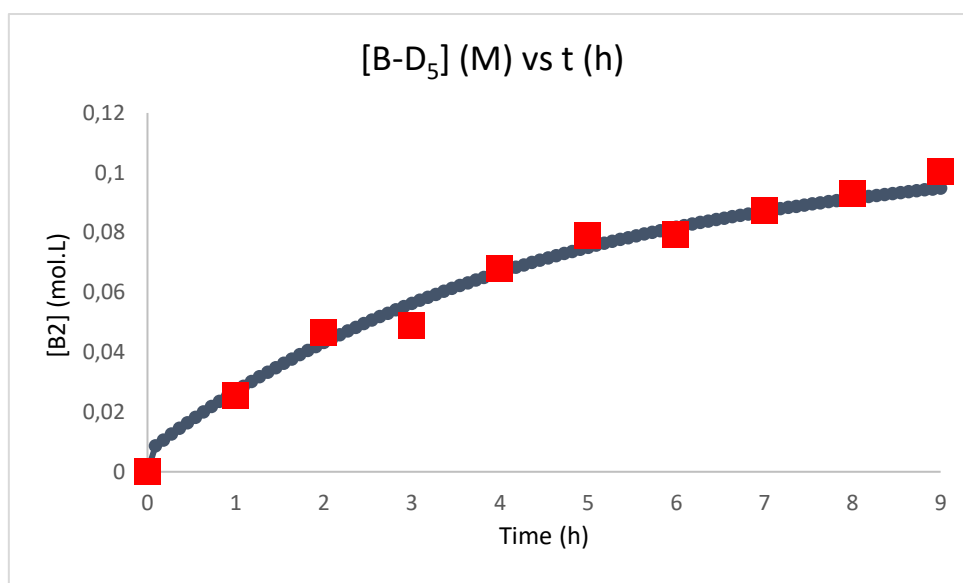

**Summary of kinetic profil**

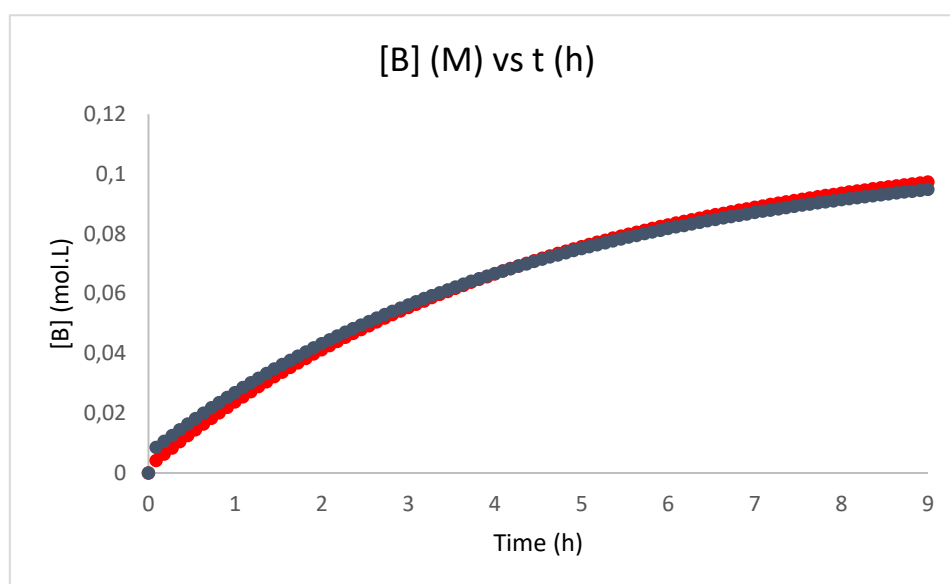

**Summary of kinetic profile:** The kinetic profiles are plotted as follow:  $N,N'$ -dimethylbenzamide kinetic profile in red and  $2,3,4,5,6-d_5-N,N'$ -dimethylbenzamide kinetic profile in blue.

### Intermolecular competition:

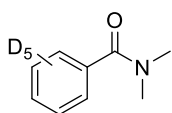

**Synthesis and characterization of 2,3,4,5,6-d<sub>5</sub>-*N,N'*-dimethylbenzamide (1a-d<sub>5</sub>):** According to the general method, 2,3,4,5,6-d<sub>5</sub>-*N,N'*-dimethylbenzamide was synthesized starting from 2,3,4,5,6-d<sub>5</sub>-benzoic acid and isolated as a white solid upon cooling (1.51 g, 91% yield). <sup>1</sup>H NMR (400 MHz, CDCl<sub>3</sub>):  $\delta$  = 3.10 (s, 3H), 2.97 (s, 3H) ppm.

**KIE evaluation by substrate competition:** [Ir(COD)(Cl)]<sub>2</sub> (1.65 mg, 2.43 x 10<sup>-6</sup> mol, 0.015 eq.), ligand **L1** (4.1 mg, 4.86 x 10<sup>-6</sup> mol, 0.03 eq.), B<sub>2</sub>pin<sub>2</sub> (41.1 mg, 1.62 x 10<sup>-4</sup> mol, 1 eq.), *N,N'*-dimethylbenzamide **1a** (48.4 mg, 1.62 x 10<sup>-4</sup> mol, 1 eq), 2,3,4,5,6-D<sub>5</sub>-*N,N'*-dimethylbenzamide **1a-d<sub>5</sub>** (49.8 mg, 1.62 x 10<sup>-4</sup> mol, 1 eq.) and dodecane (0.25 eq.) were introduced in an oven dried Schlenk flask. *p*-xylene (1 mL) was added and the reaction mixture was stirred at 80 °C for 16 hours before full conversion of both benzamide starting materials. The reaction mixture was then cooled at room temperature, evaporated and the mixture of borylated product was purified by column chromatography (SiO<sub>2</sub>, n-heptane:EtOAc, v/v 1:0 to 1:1) affording the mixture as a colorless oil.

The KIE was calculated as it follows:

Relative number of non deuterated mono-borylated product (based on aromatic hydrogen):  
 $N = 1.19 + 1.25 + 1.29 + 1.21 = 4.94$ .

Relative number of deuterated mono-borylated product:  $N_d = (8 - 4.94) = 3.06$ .

$KIE = N/N_d = (4.94/3.06) = 1.61$

See details in the NMR spectra below.

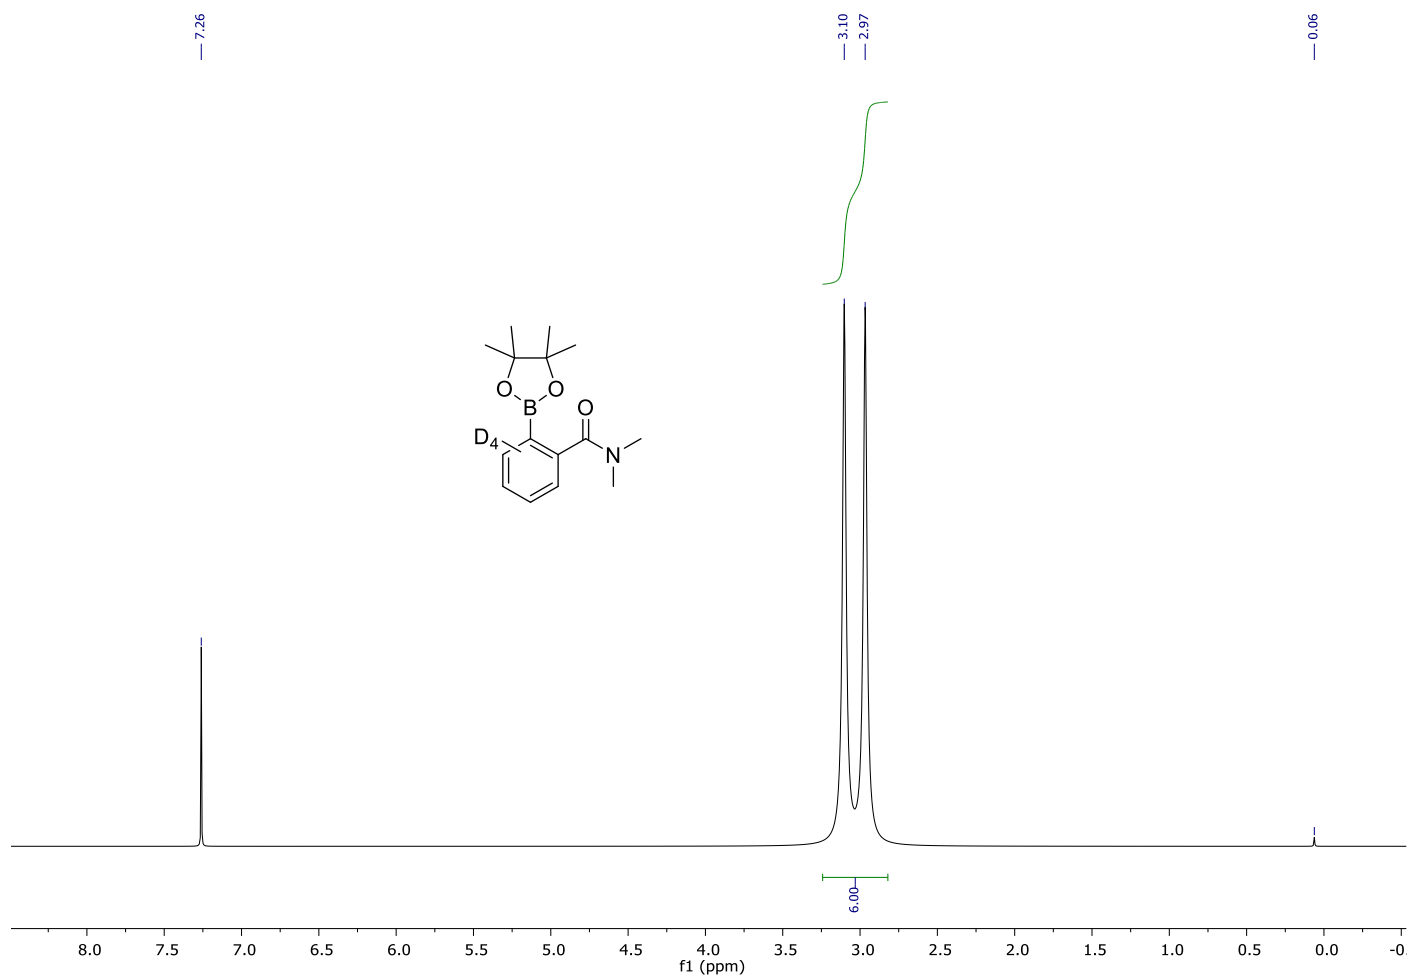

<sup>1</sup>H NMR (CDCl<sub>3</sub>, 400 MHz) spectrum of 2-(4,4,5,5-tetramethyl-1,3,2-dioxaborolan-2-yl)-3,4,5,6-D<sub>5</sub>-N,N'-dimethylbenzamide **1a-d<sub>5</sub>**.

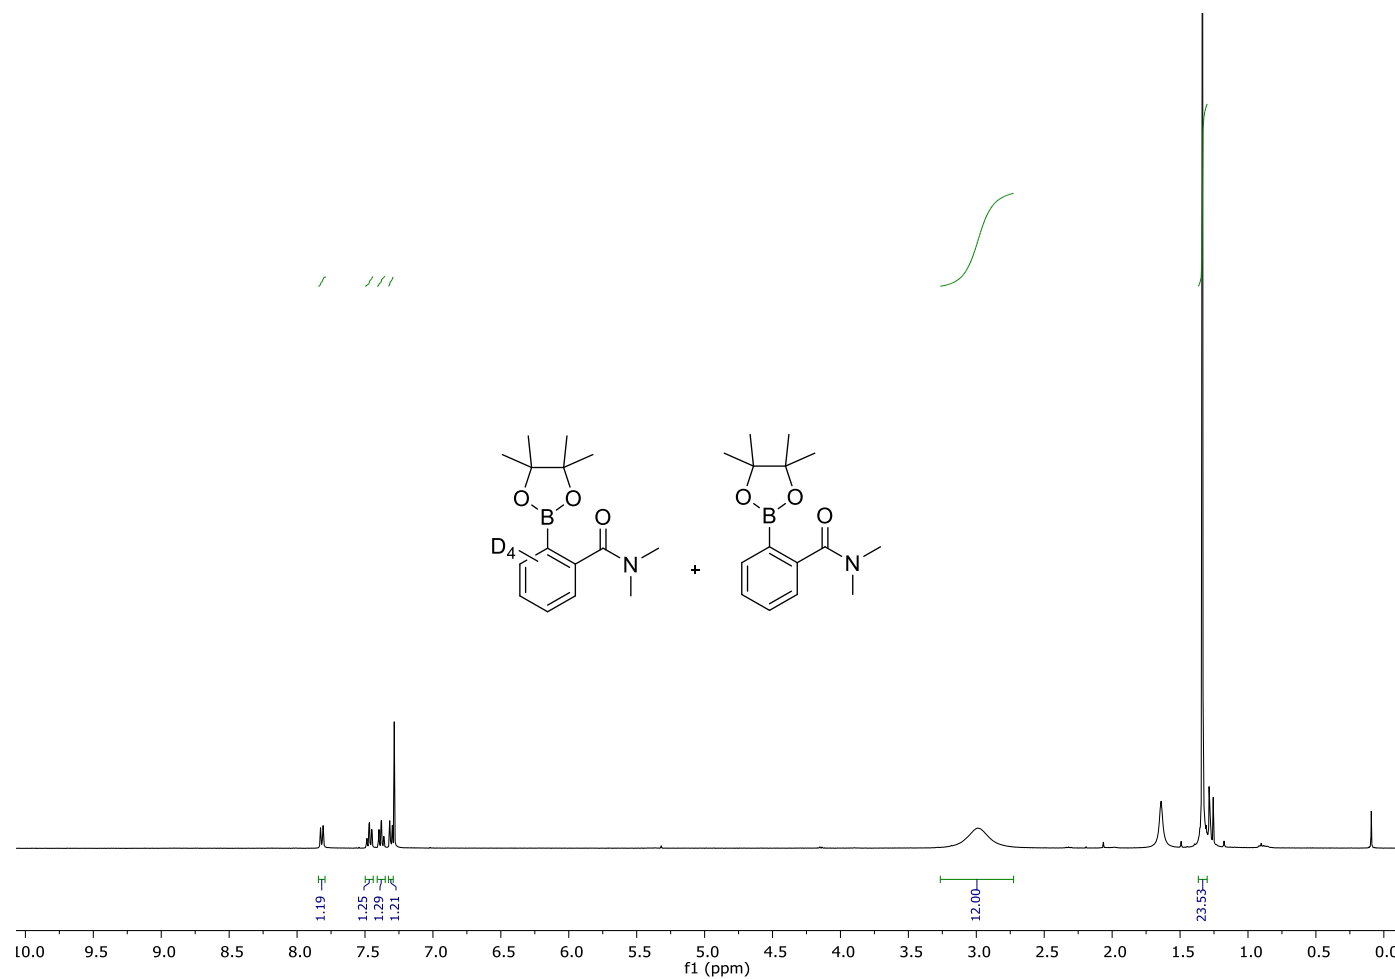

<sup>1</sup>H NMR (CDCl<sub>3</sub>, 400 MHz) spectrum of the mixture of 2-(4,4,5,5-tetramethyl-1,3,2-dioxaborolan-2-yl)-3,4,5,6-D<sub>4</sub>-N,N'-dimethylbenzamide **2a-d<sub>4</sub>** and 2-(4,4,5,5-tetramethyl-1,3,2-dioxaborolan-2-yl)-N,N'-dimethylbenzamide **2a**

#### 4. X-ray crystallographic data for ZnTPP⊂DMF.

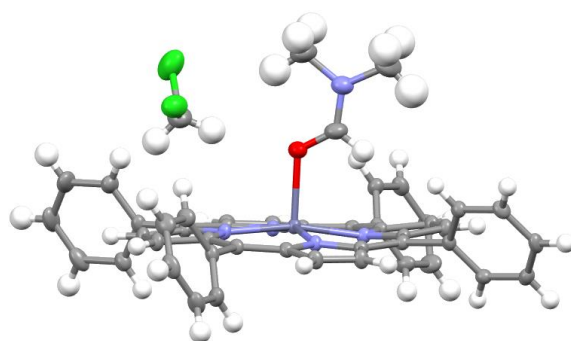

(C<sub>47</sub> H<sub>35</sub> N<sub>5</sub> O Zn, C H<sub>2</sub> Cl<sub>2</sub>);  $M = 836.09$ . APEXII, Bruker-AXS diffractometer, Mo-K $\alpha$  radiation ( $\lambda = 0.71073 \text{ \AA}$ ),  $T = 150(2) \text{ K}$ ; Triclinic  $P \bar{1}$  (I.T.#2),  $a = 11.1934(5)$ ,  $b = 12.5189(6)$ ,  $c = 14.5833(6) \text{ \AA}$ ,  $\alpha = 98.996(2)$ ,  $\beta = 94.719(2)$ ,  $\gamma = 103.136(2)^\circ$ ,  $V = 1950.79(15) \text{ \AA}^3$ ,  $Z = 2$ ,  $d = 1.423 \text{ g.cm}^{-3}$ ,  $\mu = 0.812 \text{ mm}^{-1}$ . The structure was solved by direct methods using the *SIR97* program,<sup>19</sup> and then refined with full-matrix least-square methods based on  $F^2$  (*SHELXL-97*).<sup>20</sup> All non-hydrogen atoms were refined with anisotropic atomic displacement parameters. H atoms were finally included in their calculated positions. A final refinement on  $F^2$  with 8916 unique intensities and 516 parameters converged at  $\omega R(F^2) = 0.0917$  ( $R(F) = 0.0370$ ) for 7536 observed reflections with  $I > 2\sigma(I)$ .

## Structural data

|                                      |                                                                                                                                  |
|--------------------------------------|----------------------------------------------------------------------------------------------------------------------------------|
| Empirical formula                    | C <sub>48</sub> H <sub>37</sub> Cl <sub>2</sub> N <sub>5</sub> O Zn                                                              |
| Extended formula                     | C <sub>47</sub> H <sub>35</sub> N <sub>5</sub> O Zn, C H <sub>2</sub> Cl <sub>2</sub>                                            |
| Formula weight                       | 836.09                                                                                                                           |
| Temperature                          | 150(2) K                                                                                                                         |
| Wavelength                           | 0.71073 Å                                                                                                                        |
| Crystal system, space group          | Triclinic, <i>P</i> $\bar{1}$                                                                                                    |
| Unit cell dimensions                 | a = 11.1934(5) Å, $\alpha$ = 98.996(2) °<br>b = 12.5189(6) Å, $\beta$ = 94.719(2) °<br>c = 14.5833(6) Å, $\gamma$ = 103.136(2) ° |
| Volume                               | 1950.79(15) Å <sup>3</sup>                                                                                                       |
| Z, Calculated density                | 2, 1.423 (g.cm <sup>-3</sup> )                                                                                                   |
| Absorption coefficient               | 0.812 mm <sup>-1</sup>                                                                                                           |
| <i>F</i> (000)                       | 864                                                                                                                              |
| Crystal size                         | 0.370 x 0.250 x 0.210 mm                                                                                                         |
| Crystal color                        | red                                                                                                                              |
| Theta range for data collection      | 2.914 to 27.543 °                                                                                                                |
| h <sub>min</sub> , h <sub>max</sub>  | -12, 14                                                                                                                          |
| k <sub>min</sub> , k <sub>max</sub>  | -16, 16                                                                                                                          |
| l <sub>min</sub> , l <sub>max</sub>  | -18, 16                                                                                                                          |
| Reflections collected / unique       | 21741 / 8916 [R(int) <sup>a</sup> = 0.0294]                                                                                      |
| Reflections [I>2σ]                   | 7536                                                                                                                             |
| Completeness to theta <sub>max</sub> | 0.992                                                                                                                            |
| Absorption correction type           | multi-scan                                                                                                                       |
| Max. and min. transmission           | 0.843 , 0.795                                                                                                                    |
| Refinement method                    | Full-matrix least-squares on <i>F</i> <sup>2</sup>                                                                               |
| Data / restraints / parameters       | 8916 / 0 / 516                                                                                                                   |
| <sup>b</sup> Goodness-of-fit         | 1.051                                                                                                                            |
| Final R indices [I>2σ]               | R1 <sup>c</sup> = 0.0370, wR2 <sup>d</sup> = 0.0917                                                                              |
| R indices (all data)                 | R1 <sup>c</sup> = 0.0461, wR2 <sup>d</sup> = 0.0962                                                                              |
| Largest diff. peak and hole          | 0.544 and -0.552 e <sup>-</sup> .Å <sup>-3</sup>                                                                                 |

$$^a R_{int} = \sum |F_o^2 - \langle F_o^2 \rangle| / \sum [F_o^2]$$

$$^b S = \{ \sum [w(F_o^2 - F_c^2)^2] / (n - p) \}^{1/2}$$

$$^c R1 = \sum | |F_o| - |F_c| | / \sum |F_o|$$

$$^d wR2 = \{ \sum [w(F_o^2 - F_c^2)^2] / \sum [w(F_o^2)^2] \}^{1/2}$$

$$w = 1 / [\sigma(F_o^2) + aP^2 + bP] \text{ where } P = [2F_c^2 + \text{MAX}(F_o^2, 0)] / 3$$

**Atomic coordinates, site occupancy (%) and equivalent isotropic displacement parameters ( $\text{\AA}^2$ ). U(eq) is defined as one third of the trace of the orthogonalized  $U_{ij}$  tensor.**

| Atom | x           | y           | z           | occ. | U(eq)      |
|------|-------------|-------------|-------------|------|------------|
| Zn1  | 0.57107(2)  | 0.43779(2)  | 0.77875(2)  | 1    | 0.01677(7) |
| C1   | 0.69589(17) | 0.25101(15) | 0.70736(12) | 1    | 0.0191(4)  |
| C2   | 0.79886(17) | 0.32578(16) | 0.68562(13) | 1    | 0.0195(4)  |
| C3   | 0.82101(17) | 0.44260(15) | 0.70462(13) | 1    | 0.0197(4)  |
| C4   | 0.92887(17) | 0.51834(16) | 0.68374(14) | 1    | 0.0239(4)  |
| H4   | 0.9956      | 0.4984      | 0.6547      | 1    | 0.029      |
| C5   | 0.91732(17) | 0.62310(16) | 0.71324(14) | 1    | 0.0230(4)  |
| H5   | 0.9749      | 0.6905      | 0.7097      | 1    | 0.028      |
| C6   | 0.80126(16) | 0.61303(15) | 0.75110(12) | 1    | 0.0188(4)  |
| C7   | 0.75307(16) | 0.70346(15) | 0.78647(12) | 1    | 0.0184(4)  |
| C8   | 0.63990(16) | 0.69423(15) | 0.82283(12) | 1    | 0.0184(4)  |
| C9   | 0.58498(17) | 0.78645(16) | 0.84928(13) | 1    | 0.0222(4)  |
| H9   | 0.6186      | 0.8622      | 0.8454      | 1    | 0.027      |
| C10  | 0.47679(18) | 0.74499(15) | 0.88067(14) | 1    | 0.0228(4)  |
| H10  | 0.4198      | 0.7860      | 0.9026      | 1    | 0.027      |
| C11  | 0.46411(16) | 0.62670(15) | 0.87454(12) | 1    | 0.0180(4)  |
| C12  | 0.36460(16) | 0.55245(15) | 0.90142(12) | 1    | 0.0185(4)  |
| C13  | 0.35002(16) | 0.43656(15) | 0.89176(13) | 1    | 0.0184(4)  |
| C14  | 0.25376(17) | 0.36266(16) | 0.92725(14) | 1    | 0.0230(4)  |
| H14  | 0.1925      | 0.3836      | 0.9626      | 1    | 0.028      |
| C15  | 0.26691(17) | 0.25798(16) | 0.90092(14) | 1    | 0.0228(4)  |
| H15  | 0.2161      | 0.1914      | 0.9136      | 1    | 0.027      |
| C16  | 0.37295(16) | 0.26650(15) | 0.84985(13) | 1    | 0.0189(4)  |
| C17  | 0.41701(16) | 0.17555(15) | 0.80954(13) | 1    | 0.0189(4)  |
| C18  | 0.52281(17) | 0.18307(15) | 0.76331(13) | 1    | 0.0191(4)  |
| C19  | 0.57507(18) | 0.09015(16) | 0.73178(14) | 1    | 0.0233(4)  |
| H19  | 0.5413      | 0.0141      | 0.7347      | 1    | 0.028      |
| C20  | 0.68112(17) | 0.13201(16) | 0.69735(14) | 1    | 0.0226(4)  |
| H20  | 0.7357      | 0.0908      | 0.6714      | 1    | 0.027      |
| C21  | 0.89460(17) | 0.27648(16) | 0.64016(14) | 1    | 0.0225(4)  |
| C22  | 0.8692(2)   | 0.21693(19) | 0.54948(15) | 1    | 0.0314(5)  |
| H22  | 0.7902      | 0.2073      | 0.5155      | 1    | 0.038      |
| C23  | 0.9578(2)   | 0.1711(2)   | 0.50759(17) | 1    | 0.0412(6)  |
| H23  | 0.9391      | 0.1301      | 0.4455      | 1    | 0.049      |
| C24  | 1.0725(2)   | 0.1855(2)   | 0.55642(17) | 1    | 0.0404(6)  |
| H24  | 1.1334      | 0.1549      | 0.5277      | 1    | 0.048      |
| C25  | 1.0996(2)   | 0.24400(19) | 0.64663(18) | 1    | 0.0363(5)  |
| H25  | 1.1788      | 0.2534      | 0.6801      | 1    | 0.044      |
| C26  | 1.01046(18) | 0.28953(17) | 0.68897(15) | 1    | 0.0263(4)  |
| H26  | 1.0291      | 0.3296      | 0.7514      | 1    | 0.032      |
| C31  | 0.26488(16) | 0.59928(15) | 0.94258(13) | 1    | 0.0188(4)  |
| C32  | 0.29163(17) | 0.67791(16) | 1.02479(13) | 1    | 0.0214(4)  |
| H32  | 0.3739      | 0.7021      | 1.0554      | 1    | 0.026      |
| C33  | 0.19941(18) | 0.72123(17) | 1.06247(14) | 1    | 0.0247(4)  |
| H33  | 0.2191      | 0.7756      | 1.1183      | 1    | 0.030      |
| C34  | 0.07848(18) | 0.68588(16) | 1.01931(14) | 1    | 0.0249(4)  |
| H34  | 0.0154      | 0.7160      | 1.0452      | 1    | 0.030      |
| C35  | 0.05040(17) | 0.60627(16) | 0.93818(14) | 1    | 0.0245(4)  |
| H35  | -0.0324     | 0.5804      | 0.9088      | 1    | 0.029      |

|      |             |              |             |   |             |
|------|-------------|--------------|-------------|---|-------------|
| C36  | 0.14358(17) | 0.56427(15)  | 0.89980(13) | 1 | 0.0212(4)   |
| H36  | 0.1240      | 0.5108       | 0.8435      | 1 | 0.025       |
| C41  | 0.82842(16) | 0.81921(15)  | 0.78766(13) | 1 | 0.0195(4)   |
| C42  | 0.85198(18) | 0.85971(16)  | 0.70577(14) | 1 | 0.0238(4)   |
| H42  | 0.8212      | 0.8125       | 0.6470      | 1 | 0.029       |
| C43  | 0.91949(18) | 0.96755(17)  | 0.70858(15) | 1 | 0.0268(4)   |
| H43  | 0.9350      | 0.9937       | 0.6519      | 1 | 0.032       |
| C44  | 0.96444(19) | 1.03739(17)  | 0.79327(15) | 1 | 0.0296(5)   |
| H44  | 1.0118      | 1.1112       | 0.7951      | 1 | 0.035       |
| C45  | 0.9402(2)   | 0.99934(18)  | 0.87558(16) | 1 | 0.0343(5)   |
| H45  | 0.9692      | 1.0475       | 0.9341      | 1 | 0.041       |
| C46  | 0.8732(2)   | 0.89050(17)  | 0.87227(14) | 1 | 0.0289(4)   |
| H46  | 0.8579      | 0.8645       | 0.9290      | 1 | 0.035       |
| C51  | 0.34681(17) | 0.06216(15)  | 0.82041(14) | 1 | 0.0211(4)   |
| C52  | 0.3371(2)   | 0.03452(17)  | 0.90879(15) | 1 | 0.0279(4)   |
| H52  | 0.3800      | 0.0865       | 0.9624      | 1 | 0.034       |
| C53  | 0.2661(2)   | -0.06719(18) | 0.91968(16) | 1 | 0.0329(5)   |
| H53  | 0.2592      | -0.0840      | 0.9806      | 1 | 0.040       |
| C54  | 0.2052(2)   | -0.14458(17) | 0.84258(17) | 1 | 0.0338(5)   |
| H54  | 0.1556      | -0.2143      | 0.8501      | 1 | 0.041       |
| C55  | 0.2170(2)   | -0.11985(18) | 0.75425(17) | 1 | 0.0343(5)   |
| H55  | 0.1775      | -0.1738      | 0.7008      | 1 | 0.041       |
| C56  | 0.28630(19) | -0.01672(16) | 0.74292(15) | 1 | 0.0277(4)   |
| H56  | 0.2924      | 0.0000       | 0.6819      | 1 | 0.033       |
| O61  | 0.46635(13) | 0.43070(12)  | 0.64573(10) | 1 | 0.0304(3)   |
| C62  | 0.3857(2)   | 0.4841(2)    | 0.64143(16) | 1 | 0.0368(5)   |
| H62  | 0.3740      | 0.5277       | 0.6979      | 1 | 0.044       |
| N63  | 0.31549(18) | 0.48496(17)  | 0.56533(13) | 1 | 0.0379(4)   |
| C64  | 0.3254(3)   | 0.4194(3)    | 0.47825(18) | 1 | 0.0575(8)   |
| H64A | 0.3924      | 0.3819       | 0.4865      | 1 | 0.086       |
| H64B | 0.3431      | 0.4678       | 0.4318      | 1 | 0.086       |
| H64C | 0.2474      | 0.3634       | 0.4566      | 1 | 0.086       |
| C65  | 0.2213(3)   | 0.5476(3)    | 0.5657(2)   | 1 | 0.0641(9)   |
| H65A | 0.2223      | 0.5878       | 0.6292      | 1 | 0.096       |
| H65B | 0.1401      | 0.4963       | 0.5450      | 1 | 0.096       |
| H65C | 0.2381      | 0.6011       | 0.5232      | 1 | 0.096       |
| C101 | 0.4900(3)   | 0.1792(2)    | 0.51183(19) | 1 | 0.0530(7)   |
| H10A | 0.5595      | 0.1503       | 0.5358      | 1 | 0.064       |
| H10B | 0.4886      | 0.2477       | 0.5556      | 1 | 0.064       |
| N1   | 0.59774(14) | 0.27980(12)  | 0.74697(10) | 1 | 0.0178(3)   |
| N2   | 0.74467(13) | 0.50255(13)  | 0.74574(11) | 1 | 0.0185(3)   |
| N3   | 0.56354(14) | 0.59760(12)  | 0.83740(11) | 1 | 0.0184(3)   |
| N4   | 0.42261(14) | 0.37619(12)  | 0.84619(11) | 1 | 0.0183(3)   |
| Cl1  | 0.35036(6)  | 0.07889(7)   | 0.50755(5)  | 1 | 0.05400(18) |
| Cl2  | 0.51350(9)  | 0.21186(6)   | 0.40039(6)  | 1 | 0.0677(2)   |

# Anisotropic displacement parameters ( $\text{\AA}^2$ )

The anisotropic displacement factor exponent takes the form:  $-2\pi^2 [h^2 a^{*2} U_{11} + \dots + 2 h k a^* b^* U_{12}]$ .

| Atom | U11         | U22         | U33         | U23        | U13         | U12        |
|------|-------------|-------------|-------------|------------|-------------|------------|
| Zn1  | 0.01554(11) | 0.01495(11) | 0.01942(12) | 0.00280(8) | 0.00501(8)  | 0.00211(8) |
| C1   | 0.0191(9)   | 0.0197(9)   | 0.0183(9)   | 0.0021(7)  | 0.0030(7)   | 0.0047(7)  |
| C2   | 0.0178(9)   | 0.0233(10)  | 0.0188(9)   | 0.0033(7)  | 0.0053(7)   | 0.0069(7)  |
| C3   | 0.0188(9)   | 0.0216(9)   | 0.0193(9)   | 0.0048(7)  | 0.0046(7)   | 0.0045(7)  |
| C4   | 0.0184(9)   | 0.0266(10)  | 0.0277(10)  | 0.0072(8)  | 0.0079(8)   | 0.0045(8)  |
| C5   | 0.0178(9)   | 0.0220(10)  | 0.0285(10)  | 0.0069(8)  | 0.0055(8)   | 0.0013(7)  |
| C6   | 0.0171(9)   | 0.0197(9)   | 0.0177(9)   | 0.0028(7)  | 0.0022(7)   | 0.0013(7)  |
| C7   | 0.0193(9)   | 0.0169(9)   | 0.0171(9)   | 0.0040(7)  | 0.0023(7)   | 0.0001(7)  |
| C8   | 0.0191(9)   | 0.0162(9)   | 0.0177(9)   | 0.0016(7)  | 0.0024(7)   | 0.0005(7)  |
| C9   | 0.0234(10)  | 0.0166(9)   | 0.0256(10)  | 0.0029(7)  | 0.0063(8)   | 0.0025(7)  |
| C10  | 0.0240(10)  | 0.0174(9)   | 0.0271(10)  | 0.0024(8)  | 0.0070(8)   | 0.0051(8)  |
| C11  | 0.0171(9)   | 0.0180(9)   | 0.0177(9)   | 0.0011(7)  | 0.0029(7)   | 0.0029(7)  |
| C12  | 0.0161(8)   | 0.0190(9)   | 0.0196(9)   | 0.0021(7)  | 0.0036(7)   | 0.0032(7)  |
| C13  | 0.0143(8)   | 0.0201(9)   | 0.0206(9)   | 0.0043(7)  | 0.0036(7)   | 0.0030(7)  |
| C14  | 0.0187(9)   | 0.0212(10)  | 0.0307(10)  | 0.0069(8)  | 0.0106(8)   | 0.0043(7)  |
| C15  | 0.0189(9)   | 0.0207(10)  | 0.0304(10)  | 0.0086(8)  | 0.0096(8)   | 0.0028(7)  |
| C16  | 0.0158(9)   | 0.0186(9)   | 0.0216(9)   | 0.0041(7)  | 0.0025(7)   | 0.0024(7)  |
| C17  | 0.0181(9)   | 0.0151(9)   | 0.0223(9)   | 0.0038(7)  | 0.0025(7)   | 0.0015(7)  |
| C18  | 0.0194(9)   | 0.0159(9)   | 0.0203(9)   | 0.0014(7)  | 0.0021(7)   | 0.0021(7)  |
| C19  | 0.0237(10)  | 0.0164(9)   | 0.0287(10)  | 0.0015(8)  | 0.0051(8)   | 0.0041(7)  |
| C20  | 0.0216(9)   | 0.0192(9)   | 0.0269(10)  | 0.0006(8)  | 0.0060(8)   | 0.0059(7)  |
| C21  | 0.0221(9)   | 0.0210(10)  | 0.0276(10)  | 0.0083(8)  | 0.0110(8)   | 0.0067(8)  |
| C22  | 0.0322(11)  | 0.0401(13)  | 0.0260(11)  | 0.0054(9)  | 0.0081(9)   | 0.0160(10) |
| C23  | 0.0503(15)  | 0.0526(16)  | 0.0297(12)  | 0.0065(11) | 0.0183(11)  | 0.0270(12) |
| C24  | 0.0408(13)  | 0.0504(15)  | 0.0460(14)  | 0.0199(12) | 0.0273(11)  | 0.0286(12) |
| C25  | 0.0222(11)  | 0.0397(13)  | 0.0557(15)  | 0.0228(11) | 0.0127(10)  | 0.0129(9)  |
| C26  | 0.0225(10)  | 0.0243(10)  | 0.0337(11)  | 0.0087(9)  | 0.0056(8)   | 0.0058(8)  |
| C31  | 0.0184(9)   | 0.0175(9)   | 0.0218(9)   | 0.0058(7)  | 0.0060(7)   | 0.0046(7)  |
| C32  | 0.0199(9)   | 0.0231(10)  | 0.0205(9)   | 0.0045(8)  | 0.0015(7)   | 0.0039(7)  |
| C33  | 0.0291(10)  | 0.0246(10)  | 0.0216(10)  | 0.0037(8)  | 0.0084(8)   | 0.0074(8)  |
| C34  | 0.0229(10)  | 0.0259(10)  | 0.0319(11)  | 0.0107(8)  | 0.0141(8)   | 0.0109(8)  |
| C35  | 0.0149(9)   | 0.0264(10)  | 0.0330(11)  | 0.0103(8)  | 0.0042(8)   | 0.0031(8)  |
| C36  | 0.0202(9)   | 0.0186(9)   | 0.0240(10)  | 0.0035(7)  | 0.0038(7)   | 0.0032(7)  |
| C41  | 0.0150(8)   | 0.0173(9)   | 0.0259(10)  | 0.0043(7)  | 0.0045(7)   | 0.0024(7)  |
| C42  | 0.0257(10)  | 0.0226(10)  | 0.0235(10)  | 0.0043(8)  | 0.0068(8)   | 0.0050(8)  |
| C43  | 0.0277(10)  | 0.0247(10)  | 0.0324(11)  | 0.0127(9)  | 0.0101(9)   | 0.0076(8)  |
| C44  | 0.0271(11)  | 0.0182(10)  | 0.0417(13)  | 0.0096(9)  | 0.0025(9)   | -0.0004(8) |
| C45  | 0.0393(12)  | 0.0232(11)  | 0.0322(12)  | 0.0029(9)  | -0.0040(9)  | -0.0049(9) |
| C46  | 0.0362(12)  | 0.0224(10)  | 0.0237(10)  | 0.0064(8)  | 0.0010(8)   | -0.0022(9) |
| C51  | 0.0179(9)   | 0.0164(9)   | 0.0301(10)  | 0.0055(8)  | 0.0074(7)   | 0.0043(7)  |
| C52  | 0.0357(11)  | 0.0213(10)  | 0.0287(11)  | 0.0050(8)  | 0.0087(9)   | 0.0089(9)  |
| C53  | 0.0398(12)  | 0.0287(11)  | 0.0392(12)  | 0.0177(10) | 0.0179(10)  | 0.0140(10) |
| C54  | 0.0268(11)  | 0.0201(10)  | 0.0568(15)  | 0.0152(10) | 0.0109(10)  | 0.0027(8)  |
| C55  | 0.0287(11)  | 0.0231(11)  | 0.0453(13)  | 0.0042(10) | 0.0003(10)  | -0.0028(9) |
| C56  | 0.0272(10)  | 0.0220(10)  | 0.0315(11)  | 0.0058(8)  | 0.0027(8)   | 0.0009(8)  |
| O61  | 0.0319(8)   | 0.0315(8)   | 0.0274(8)   | 0.0047(6)  | -0.0006(6)  | 0.0086(7)  |
| C62  | 0.0337(12)  | 0.0473(14)  | 0.0266(11)  | 0.0068(10) | -0.0017(9)  | 0.0059(11) |
| N63  | 0.0334(10)  | 0.0471(12)  | 0.0334(10)  | 0.0094(9)  | 0.0007(8)   | 0.0099(9)  |
| C64  | 0.0594(18)  | 0.079(2)    | 0.0339(14)  | 0.0030(14) | -0.0035(12) | 0.0233(16) |
| C65  | 0.0458(16)  | 0.100(3)    | 0.0560(18)  | 0.0127(17) | -0.0001(14) | 0.0395(17) |

|      |            |            |            |             |             |            |
|------|------------|------------|------------|-------------|-------------|------------|
| C101 | 0.0528(17) | 0.0557(18) | 0.0461(16) | -0.0003(13) | -0.0100(13) | 0.0163(14) |
| N1   | 0.0165(7)  | 0.0163(8)  | 0.0200(8)  | 0.0025(6)   | 0.0052(6)   | 0.0026(6)  |
| N2   | 0.0169(7)  | 0.0178(8)  | 0.0208(8)  | 0.0028(6)   | 0.0056(6)   | 0.0036(6)  |
| N3   | 0.0172(7)  | 0.0166(8)  | 0.0205(8)  | 0.0033(6)   | 0.0049(6)   | 0.0016(6)  |
| N4   | 0.0171(7)  | 0.0161(8)  | 0.0220(8)  | 0.0032(6)   | 0.0052(6)   | 0.0037(6)  |
| Cl1  | 0.0432(4)  | 0.0780(5)  | 0.0434(4)  | 0.0092(3)   | 0.0078(3)   | 0.0203(3)  |
| Cl2  | 0.0896(6)  | 0.0502(4)  | 0.0589(5)  | 0.0017(3)   | 0.0246(4)   | 0.0082(4)  |

### Bond lengths [Å]

|           |              |
|-----------|--------------|
| Zn1 - N1  | = 2.0543(15) |
| Zn1 - N2  | = 2.0554(15) |
| Zn1 - N4  | = 2.0608(15) |
| Zn1 - N3  | = 2.0723(15) |
| Zn1 - O61 | = 2.1609(14) |
| C1 - N1   | = 1.375(2)   |
| C1 - C2   | = 1.403(3)   |
| C1 - C20  | = 1.444(3)   |
| C2 - C3   | = 1.405(3)   |
| C2 - C21  | = 1.503(2)   |
| C3 - N2   | = 1.374(2)   |
| C3 - C4   | = 1.442(2)   |
| C4 - C5   | = 1.353(3)   |
| C4 - H4   | = 0.9500     |
| C5 - C6   | = 1.440(2)   |
| C5 - H5   | = 0.9500     |
| C6 - N2   | = 1.371(2)   |
| C6 - C7   | = 1.407(3)   |
| C7 - C8   | = 1.401(2)   |
| C7 - C41  | = 1.499(2)   |
| C8 - N3   | = 1.371(2)   |
| C8 - C9   | = 1.443(3)   |
| C9 - C10  | = 1.351(3)   |
| C9 - H9   | = 0.9500     |
| C10 - C11 | = 1.443(3)   |
| C10 - H10 | = 0.9500     |
| C11 - N3  | = 1.373(2)   |
| C11 - C12 | = 1.405(2)   |
| C12 - C13 | = 1.406(3)   |
| C12 - C31 | = 1.499(2)   |
| C13 - N4  | = 1.373(2)   |
| C13 - C14 | = 1.440(2)   |
| C14 - C15 | = 1.351(3)   |
| C14 - H14 | = 0.9500     |
| C15 - C16 | = 1.445(2)   |
| C15 - H15 | = 0.9500     |
| C16 - N4  | = 1.371(2)   |
| C16 - C17 | = 1.407(3)   |
| C17 - C18 | = 1.402(2)   |
| C17 - C51 | = 1.497(2)   |
| C18 - N1  | = 1.374(2)   |
| C18 - C19 | = 1.447(3)   |
| C19 - C20 | = 1.354(3)   |
| C19 - H19 | = 0.9500     |

C20 - H20 = 0.9500  
 C21 - C22 = 1.385(3)  
 C21 - C26 = 1.389(3)  
 C22 - C23 = 1.391(3)  
 C22 - H22 = 0.9500  
 C23 - C24 = 1.376(4)  
 C23 - H23 = 0.9500  
 C24 - C25 = 1.375(4)  
 C24 - H24 = 0.9500  
 C25 - C26 = 1.397(3)  
 C25 - H25 = 0.9500  
 C26 - H26 = 0.9500  
 C31 - C36 = 1.389(3)  
 C31 - C32 = 1.391(3)  
 C32 - C33 = 1.384(3)  
 C32 - H32 = 0.9500  
 C33 - C34 = 1.387(3)  
 C33 - H33 = 0.9500  
 C34 - C35 = 1.385(3)  
 C34 - H34 = 0.9500  
 C35 - C36 = 1.390(3)  
 C35 - H35 = 0.9500  
 C36 - H36 = 0.9500  
 C41 - C46 = 1.386(3)  
 C41 - C42 = 1.390(3)  
 C42 - C43 = 1.382(3)  
 C42 - H42 = 0.9500  
 C43 - C44 = 1.380(3)  
 C43 - H43 = 0.9500  
 C44 - C45 = 1.384(3)  
 C44 - H44 = 0.9500  
 C45 - C46 = 1.389(3)  
 C45 - H45 = 0.9500  
 C46 - H46 = 0.9500  
 C51 - C56 = 1.390(3)  
 C51 - C52 = 1.392(3)  
 C52 - C53 = 1.379(3)  
 C52 - H52 = 0.9500  
 C53 - C54 = 1.379(3)  
 C53 - H53 = 0.9500  
 C54 - C55 = 1.381(3)  
 C54 - H54 = 0.9500  
 C55 - C56 = 1.389(3)  
 C55 - H55 = 0.9500  
 C56 - H56 = 0.9500  
 O61 - C62 = 1.243(3)  
 C62 - N63 = 1.309(3)  
 C62 - H62 = 0.9500  
 N63 - C64 = 1.427(3)  
 N63 - C65 = 1.450(3)  
 C64 - H64A = 0.9800  
 C64 - H64B = 0.9800  
 C64 - H64C = 0.9800  
 C65 - H65A = 0.9800

C65 - H65B = 0.9800  
 C65 - H65C = 0.9800  
 C101 - Cl1 = 1.757(3)  
 C101 - Cl2 = 1.763(3)  
 C101 - H10A = 0.9900  
 C101 - H10B = 0.9900

# **Angles [°]**

N1 - Zn1 - N2 = 89.81(6)  
 N1 - Zn1 - N4 = 89.47(6)  
 N2 - Zn1 - N4 = 164.75(6)  
 N1 - Zn1 - N3 = 168.17(6)  
 N2 - Zn1 - N3 = 88.92(6)  
 N4 - Zn1 - N3 = 88.67(6)  
 N1 - Zn1 - O61 = 95.17(6)  
 N2 - Zn1 - O61 = 98.52(6)  
 N4 - Zn1 - O61 = 96.72(6)  
 N3 - Zn1 - O61 = 96.66(6)  
 N1 - C1 - C2 = 125.61(16)  
 N1 - C1 - C20 = 109.44(15)  
 C2 - C1 - C20 = 124.82(17)  
 C1 - C2 - C3 = 125.45(17)  
 C1 - C2 - C21 = 117.05(16)  
 C3 - C2 - C21 = 117.49(16)  
 N2 - C3 - C2 = 125.87(16)  
 N2 - C3 - C4 = 109.41(16)  
 C2 - C3 - C4 = 124.72(17)  
 C5 - C4 - C3 = 107.20(17)  
 C5 - C4 - H4 = 126.4  
 C3 - C4 - H4 = 126.4  
 C4 - C5 - C6 = 107.03(17)  
 C4 - C5 - H5 = 126.5  
 C6 - C5 - H5 = 126.5  
 N2 - C6 - C7 = 125.57(16)  
 N2 - C6 - C5 = 109.71(15)  
 C7 - C6 - C5 = 124.71(17)  
 C8 - C7 - C6 = 125.00(17)  
 C8 - C7 - C41 = 116.67(16)  
 C6 - C7 - C41 = 118.32(15)  
 N3 - C8 - C7 = 125.98(16)  
 N3 - C8 - C9 = 109.54(15)  
 C7 - C8 - C9 = 124.48(16)  
 C10 - C9 - C8 = 107.23(16)  
 C10 - C9 - H9 = 126.4  
 C8 - C9 - H9 = 126.4  
 C9 - C10 - C11 = 107.01(16)  
 C9 - C10 - H10 = 126.5  
 C11 - C10 - H10 = 126.5  
 N3 - C11 - C12 = 125.20(16)  
 N3 - C11 - C10 = 109.58(15)  
 C12 - C11 - C10 = 125.21(16)  
 C11 - C12 - C13 = 125.05(16)  
 C11 - C12 - C31 = 117.99(16)  
 C13 - C12 - C31 = 116.95(15)

|     |       |       |              |
|-----|-------|-------|--------------|
| N4  | - C13 | - C12 | = 125.86(16) |
| N4  | - C13 | - C14 | = 109.60(16) |
| C12 | - C13 | - C14 | = 124.53(16) |
| C15 | - C14 | - C13 | = 107.20(16) |
| C15 | - C14 | - H14 | = 126.4      |
| C13 | - C14 | - H14 | = 126.4      |
| C14 | - C15 | - C16 | = 107.00(16) |
| C14 | - C15 | - H15 | = 126.5      |
| C16 | - C15 | - H15 | = 126.5      |
| N4  | - C16 | - C17 | = 125.60(16) |
| N4  | - C16 | - C15 | = 109.54(15) |
| C17 | - C16 | - C15 | = 124.86(17) |
| C18 | - C17 | - C16 | = 125.39(17) |
| C18 | - C17 | - C51 | = 117.93(16) |
| C16 | - C17 | - C51 | = 116.65(15) |
| N1  | - C18 | - C17 | = 125.72(16) |
| N1  | - C18 | - C19 | = 109.42(15) |
| C17 | - C18 | - C19 | = 124.71(17) |
| C20 | - C19 | - C18 | = 107.07(17) |
| C20 | - C19 | - H19 | = 126.5      |
| C18 | - C19 | - H19 | = 126.5      |
| C19 | - C20 | - C1  | = 107.25(16) |
| C19 | - C20 | - H20 | = 126.4      |
| C1  | - C20 | - H20 | = 126.4      |
| C22 | - C21 | - C26 | = 118.80(18) |
| C22 | - C21 | - C2  | = 120.92(18) |
| C26 | - C21 | - C2  | = 120.28(18) |
| C21 | - C22 | - C23 | = 120.9(2)   |
| C21 | - C22 | - H22 | = 119.6      |
| C23 | - C22 | - H22 | = 119.6      |
| C24 | - C23 | - C22 | = 119.8(2)   |
| C24 | - C23 | - H23 | = 120.1      |
| C22 | - C23 | - H23 | = 120.1      |
| C25 | - C24 | - C23 | = 120.4(2)   |
| C25 | - C24 | - H24 | = 119.8      |
| C23 | - C24 | - H24 | = 119.8      |
| C24 | - C25 | - C26 | = 120.0(2)   |
| C24 | - C25 | - H25 | = 120.0      |
| C26 | - C25 | - H25 | = 120.0      |
| C21 | - C26 | - C25 | = 120.3(2)   |
| C21 | - C26 | - H26 | = 119.9      |
| C25 | - C26 | - H26 | = 119.9      |
| C36 | - C31 | - C32 | = 118.61(17) |
| C36 | - C31 | - C12 | = 120.66(17) |
| C32 | - C31 | - C12 | = 120.73(17) |
| C33 | - C32 | - C31 | = 120.58(18) |
| C33 | - C32 | - H32 | = 119.7      |
| C31 | - C32 | - H32 | = 119.7      |
| C32 | - C33 | - C34 | = 120.46(19) |
| C32 | - C33 | - H33 | = 119.8      |
| C34 | - C33 | - H33 | = 119.8      |
| C35 | - C34 | - C33 | = 119.45(17) |
| C35 | - C34 | - H34 | = 120.3      |
| C33 | - C34 | - H34 | = 120.3      |

|      |       |        |              |
|------|-------|--------|--------------|
| C34  | - C35 | - C36  | = 119.90(18) |
| C34  | - C35 | - H35  | = 120.1      |
| C36  | - C35 | - H35  | = 120.1      |
| C35  | - C36 | - C31  | = 120.98(18) |
| C35  | - C36 | - H36  | = 119.5      |
| C31  | - C36 | - H36  | = 119.5      |
| C46  | - C41 | - C42  | = 118.14(18) |
| C46  | - C41 | - C7   | = 119.83(17) |
| C42  | - C41 | - C7   | = 122.00(17) |
| C43  | - C42 | - C41  | = 120.99(19) |
| C43  | - C42 | - H42  | = 119.5      |
| C41  | - C42 | - H42  | = 119.5      |
| C44  | - C43 | - C42  | = 120.31(18) |
| C44  | - C43 | - H43  | = 119.8      |
| C42  | - C43 | - H43  | = 119.8      |
| C43  | - C44 | - C45  | = 119.62(19) |
| C43  | - C44 | - H44  | = 120.2      |
| C45  | - C44 | - H44  | = 120.2      |
| C44  | - C45 | - C46  | = 119.8(2)   |
| C44  | - C45 | - H45  | = 120.1      |
| C46  | - C45 | - H45  | = 120.1      |
| C41  | - C46 | - C45  | = 121.16(19) |
| C41  | - C46 | - H46  | = 119.4      |
| C45  | - C46 | - H46  | = 119.4      |
| C56  | - C51 | - C52  | = 118.36(18) |
| C56  | - C51 | - C17  | = 120.92(17) |
| C52  | - C51 | - C17  | = 120.68(18) |
| C53  | - C52 | - C51  | = 121.0(2)   |
| C53  | - C52 | - H52  | = 119.5      |
| C51  | - C52 | - H52  | = 119.5      |
| C54  | - C53 | - C52  | = 120.3(2)   |
| C54  | - C53 | - H53  | = 119.8      |
| C52  | - C53 | - H53  | = 119.8      |
| C53  | - C54 | - C55  | = 119.41(19) |
| C53  | - C54 | - H54  | = 120.3      |
| C55  | - C54 | - H54  | = 120.3      |
| C54  | - C55 | - C56  | = 120.5(2)   |
| C54  | - C55 | - H55  | = 119.7      |
| C56  | - C55 | - H55  | = 119.7      |
| C55  | - C56 | - C51  | = 120.3(2)   |
| C55  | - C56 | - H56  | = 119.8      |
| C51  | - C56 | - H56  | = 119.8      |
| C62  | - O61 | - Zn1  | = 119.75(14) |
| O61  | - C62 | - N63  | = 125.2(2)   |
| O61  | - C62 | - H62  | = 117.4      |
| N63  | - C62 | - H62  | = 117.4      |
| C62  | - N63 | - C64  | = 120.7(2)   |
| C62  | - N63 | - C65  | = 122.3(2)   |
| C64  | - N63 | - C65  | = 116.9(2)   |
| N63  | - C64 | - H64A | = 109.5      |
| N63  | - C64 | - H64B | = 109.5      |
| H64A | - C64 | - H64B | = 109.5      |
| N63  | - C64 | - H64C | = 109.5      |
| H64A | - C64 | - H64C | = 109.5      |

H64B - C64 - H64C = 109.5  
 N63 - C65 - H65A = 109.5  
 N63 - C65 - H65B = 109.5  
 H65A - C65 - H65B = 109.5  
 N63 - C65 - H65C = 109.5  
 H65A - C65 - H65C = 109.5  
 H65B - C65 - H65C = 109.5  
 Cl1 - C101 - Cl2 = 111.32(15)  
 Cl1 - C101 - H10A = 109.4  
 Cl2 - C101 - H10A = 109.4  
 Cl1 - C101 - H10B = 109.4  
 Cl2 - C101 - H10B = 109.4  
 H10A - C101 - H10B = 108.0  
 C18 - N1 - C1 = 106.81(14)  
 C18 - N1 - Zn1 = 126.72(12)  
 C1 - N1 - Zn1 = 126.45(12)  
 C6 - N2 - C3 = 106.64(14)  
 C6 - N2 - Zn1 = 126.94(12)  
 C3 - N2 - Zn1 = 126.10(12)  
 C8 - N3 - C11 = 106.61(14)  
 C8 - N3 - Zn1 = 125.35(12)  
 C11 - N3 - Zn1 = 125.75(12)  
 C16 - N4 - C13 = 106.63(14)  
 C16 - N4 - Zn1 = 126.73(12)  
 C13 - N4 - Zn1 = 126.56(12)

### Torsion angles [°]

N1 - C1 - C2 - C3 = 3.0(3)  
 C20 - C1 - C2 - C3 = -172.46(18)  
 N1 - C1 - C2 - C21 = -178.46(17)  
 C20 - C1 - C2 - C21 = 6.1(3)  
 C1 - C2 - C3 - N2 = -1.4(3)  
 C21 - C2 - C3 - N2 = -179.91(17)  
 C1 - C2 - C3 - C4 = 178.47(18)  
 C21 - C2 - C3 - C4 = -0.1(3)  
 N2 - C3 - C4 - C5 = 0.6(2)  
 C2 - C3 - C4 - C5 = -179.26(18)  
 C3 - C4 - C5 - C6 = -1.0(2)  
 C4 - C5 - C6 - N2 = 1.1(2)  
 C4 - C5 - C6 - C7 = -177.85(18)  
 N2 - C6 - C7 - C8 = 0.8(3)  
 C5 - C6 - C7 - C8 = 179.57(18)  
 N2 - C6 - C7 - C41 = 179.53(17)  
 C5 - C6 - C7 - C41 = -1.7(3)  
 C6 - C7 - C8 - N3 = 6.1(3)  
 C41 - C7 - C8 - N3 = -172.66(17)  
 C6 - C7 - C8 - C9 = -172.79(18)  
 C41 - C7 - C8 - C9 = 8.5(3)  
 N3 - C8 - C9 - C10 = 0.8(2)  
 C7 - C8 - C9 - C10 = 179.77(18)  
 C8 - C9 - C10 - C11 = 0.4(2)  
 C9 - C10 - C11 - N3 = -1.4(2)  
 C9 - C10 - C11 - C12 = 179.28(18)

N3 - C11 - C12 - C13 = -2.0(3)  
 C10 - C11 - C12 - C13 = 177.22(18)  
 N3 - C11 - C12 - C31 = 178.82(16)  
 C10 - C11 - C12 - C31 = -2.0(3)  
 C11 - C12 - C13 - N4 = -7.3(3)  
 C31 - C12 - C13 - N4 = 171.95(17)  
 C11 - C12 - C13 - C14 = 174.05(18)  
 C31 - C12 - C13 - C14 = -6.8(3)  
 N4 - C13 - C14 - C15 = -1.5(2)  
 C12 - C13 - C14 - C15 = 177.38(18)  
 C13 - C14 - C15 - C16 = 0.8(2)  
 C14 - C15 - C16 - N4 = 0.1(2)  
 C14 - C15 - C16 - C17 = -179.30(18)  
 N4 - C16 - C17 - C18 = 3.5(3)  
 C15 - C16 - C17 - C18 = -177.10(18)  
 N4 - C16 - C17 - C51 = -178.76(17)  
 C15 - C16 - C17 - C51 = 0.6(3)  
 C16 - C17 - C18 - N1 = -2.5(3)  
 C51 - C17 - C18 - N1 = 179.81(17)  
 C16 - C17 - C18 - C19 = 172.46(18)  
 C51 - C17 - C18 - C19 = -5.2(3)  
 N1 - C18 - C19 - C20 = 0.3(2)  
 C17 - C18 - C19 - C20 = -175.33(18)  
 C18 - C19 - C20 - C1 = 0.1(2)  
 N1 - C1 - C20 - C19 = -0.6(2)  
 C2 - C1 - C20 - C19 = 175.49(18)  
 C1 - C2 - C21 - C22 = 69.1(2)  
 C3 - C2 - C21 - C22 = -112.3(2)  
 C1 - C2 - C21 - C26 = -110.6(2)  
 C3 - C2 - C21 - C26 = 68.1(2)  
 C26 - C21 - C22 - C23 = -0.2(3)  
 C2 - C21 - C22 - C23 = -179.8(2)  
 C21 - C22 - C23 - C24 = -0.4(4)  
 C22 - C23 - C24 - C25 = 0.6(4)  
 C23 - C24 - C25 - C26 = -0.2(3)  
 C22 - C21 - C26 - C25 = 0.5(3)  
 C2 - C21 - C26 - C25 = -179.81(18)  
 C24 - C25 - C26 - C21 = -0.3(3)  
 C11 - C12 - C31 - C36 = 119.7(2)  
 C13 - C12 - C31 - C36 = -59.6(2)  
 C11 - C12 - C31 - C32 = -60.9(2)  
 C13 - C12 - C31 - C32 = 119.81(19)  
 C36 - C31 - C32 - C33 = -0.8(3)  
 C12 - C31 - C32 - C33 = 179.81(17)  
 C31 - C32 - C33 - C34 = 0.8(3)  
 C32 - C33 - C34 - C35 = 0.3(3)  
 C33 - C34 - C35 - C36 = -1.3(3)  
 C34 - C35 - C36 - C31 = 1.3(3)  
 C32 - C31 - C36 - C35 = -0.2(3)  
 C12 - C31 - C36 - C35 = 179.19(17)  
 C8 - C7 - C41 - C46 = 63.4(2)  
 C6 - C7 - C41 - C46 = -115.4(2)  
 C8 - C7 - C41 - C42 = -114.4(2)  
 C6 - C7 - C41 - C42 = 66.8(2)

C46 - C41 - C42 - C43 = 0.8(3)  
C7 - C41 - C42 - C43 = 178.60(17)  
C41 - C42 - C43 - C44 = -0.3(3)  
C42 - C43 - C44 - C45 = -0.9(3)  
C43 - C44 - C45 - C46 = 1.5(3)  
C42 - C41 - C46 - C45 = -0.2(3)  
C7 - C41 - C46 - C45 = -178.03(19)  
C44 - C45 - C46 - C41 = -0.9(3)  
C18 - C17 - C51 - C56 = -66.0(2)  
C16 - C17 - C51 - C56 = 116.1(2)  
C18 - C17 - C51 - C52 = 116.2(2)  
C16 - C17 - C51 - C52 = -61.7(2)  
C56 - C51 - C52 - C53 = -2.0(3)  
C17 - C51 - C52 - C53 = 175.85(18)  
C51 - C52 - C53 - C54 = 1.3(3)  
C52 - C53 - C54 - C55 = 0.7(3)  
C53 - C54 - C55 - C56 = -2.1(3)  
C54 - C55 - C56 - C51 = 1.3(3)  
C52 - C51 - C56 - C55 = 0.7(3)  
C17 - C51 - C56 - C55 = -177.17(18)  
Zn1 - O61 - C62 - N63 = -178.99(18)  
O61 - C62 - N63 - C64 = 1.6(4)  
O61 - C62 - N63 - C65 = 178.8(2)  
C17 - C18 - N1 - C1 = 174.91(17)  
C19 - C18 - N1 - C1 = -0.7(2)  
C17 - C18 - N1 - Zn1 = -3.6(3)  
C19 - C18 - N1 - Zn1 = -179.21(12)  
C2 - C1 - N1 - C18 = -175.24(18)  
C20 - C1 - N1 - C18 = 0.8(2)  
C2 - C1 - N1 - Zn1 = 3.3(3)  
C20 - C1 - N1 - Zn1 = 179.31(12)  
C7 - C6 - N2 - C3 = 178.23(17)  
C5 - C6 - N2 - C3 = -0.7(2)  
C7 - C6 - N2 - Zn1 = 4.5(3)  
C5 - C6 - N2 - Zn1 = -174.43(12)  
C2 - C3 - N2 - C6 = 179.93(17)  
C4 - C3 - N2 - C6 = 0.1(2)  
C2 - C3 - N2 - Zn1 = -6.3(3)  
C4 - C3 - N2 - Zn1 = 173.88(12)  
C7 - C8 - N3 - C11 = 179.39(17)  
C9 - C8 - N3 - C11 = -1.6(2)  
C7 - C8 - N3 - Zn1 = -17.0(3)  
C9 - C8 - N3 - Zn1 = 161.96(12)  
C12 - C11 - N3 - C8 = -178.83(18)  
C10 - C11 - N3 - C8 = 1.9(2)  
C12 - C11 - N3 - Zn1 = 17.7(3)  
C10 - C11 - N3 - Zn1 = -161.63(12)  
C17 - C16 - N4 - C13 = 178.37(18)  
C15 - C16 - N4 - C13 = -1.1(2)  
C17 - C16 - N4 - Zn1 = 1.7(3)  
C15 - C16 - N4 - Zn1 = -177.78(12)  
C12 - C13 - N4 - C16 = -177.30(18)  
C14 - C13 - N4 - C16 = 1.6(2)  
C12 - C13 - N4 - Zn1 = -0.6(3)

$$\text{C14} - \text{C13} - \text{N4} - \text{Zn1} = 178.29(12)$$

## Structure visualisation

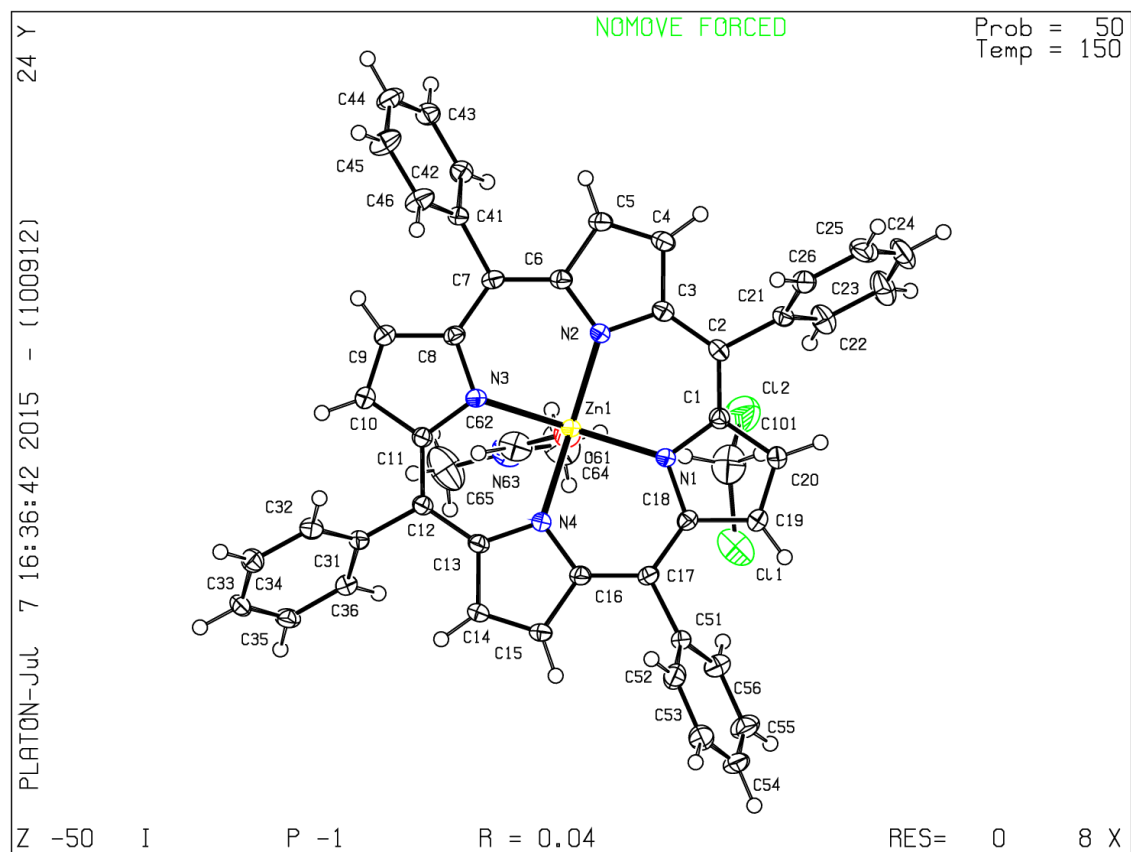

## 5. PM3-minimized molecular modelling.

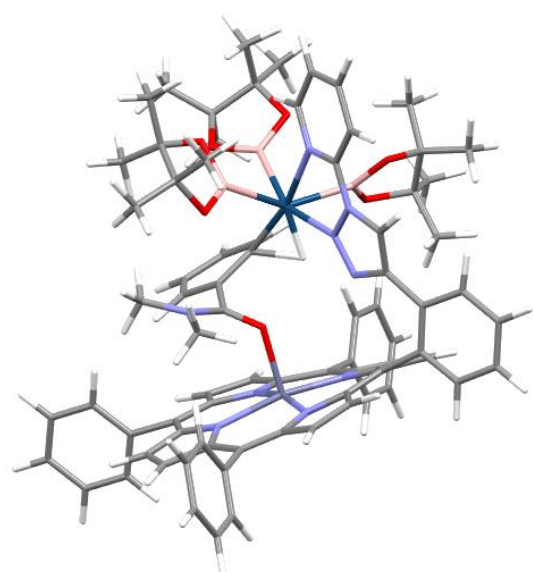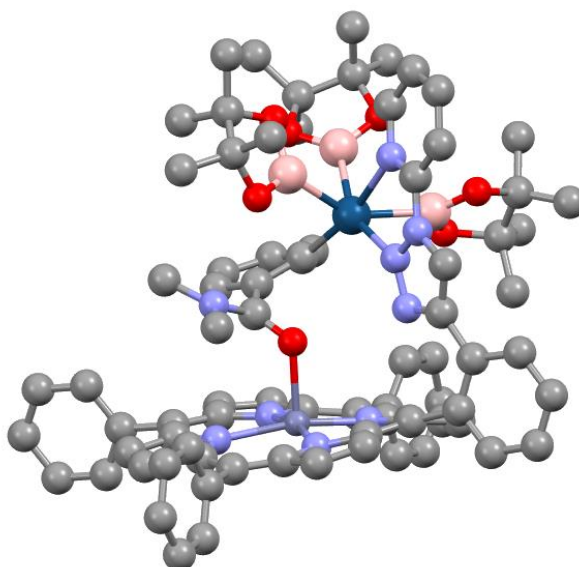

|        |    |   |     |      |        |        |        |
|--------|----|---|-----|------|--------|--------|--------|
| HETATM | 1  | N | UNK | 0001 | 1.155  | -2.560 | -1.984 |
| HETATM | 2  | C | UNK | 0001 | 1.375  | -2.303 | -3.325 |
| HETATM | 3  | C | UNK | 0001 | 2.347  | -2.447 | -1.294 |
| HETATM | 4  | C | UNK | 0001 | 2.711  | -1.942 | -3.451 |
| HETATM | 5  | C | UNK | 0001 | 3.309  | -2.024 | -2.196 |
| HETATM | 6  | C | UNK | 0001 | 2.555  | -2.753 | 0.073  |
| HETATM | 7  | C | UNK | 0001 | 1.571  | -3.118 | 0.904  |
| HETATM | 8  | N | UNK | 0001 | 0.265  | -3.228 | 0.631  |
| HETATM | 9  | C | UNK | 0001 | -0.363 | -3.478 | 1.774  |
| HETATM | 10 | C | UNK | 0001 | 0.573  | -3.613 | 2.896  |
| HETATM | 11 | C | UNK | 0001 | 1.751  | -3.408 | 2.314  |
| HETATM | 12 | C | UNK | 0001 | -1.786 | -3.640 | 1.981  |
| HETATM | 13 | C | UNK | 0001 | -2.510 | -3.888 | 0.886  |
| HETATM | 14 | N | UNK | 0001 | -2.167 | -3.902 | -0.474 |
| HETATM | 15 | C | UNK | 0001 | -3.315 | -4.217 | -1.211 |
| HETATM | 16 | C | UNK | 0001 | -3.904 | -4.293 | 0.985  |
| HETATM | 17 | C | UNK | 0001 | -4.360 | -4.540 | -0.240 |
| HETATM | 18 | C | UNK | 0001 | -3.613 | -4.221 | -2.512 |
| HETATM | 19 | C | UNK | 0001 | -2.603 | -3.705 | -3.401 |

|        |    |   |     |      |        |        |        |
|--------|----|---|-----|------|--------|--------|--------|
| HETATM | 20 | N | UNK | 0001 | -1.418 | -3.188 | -3.104 |
| HETATM | 21 | C | UNK | 0001 | -0.795 | -2.860 | -4.238 |
| HETATM | 22 | C | UNK | 0001 | -2.839 | -3.673 | -4.853 |
| HETATM | 23 | C | UNK | 0001 | -1.718 | -3.133 | -5.324 |
| HETATM | 24 | C | UNK | 0001 | 0.459  | -2.432 | -4.396 |
| HETATM | 25 | C | UNK | 0001 | 2.054  | -3.069 | -7.781 |
| HETATM | 26 | C | UNK | 0001 | 0.698  | -1.007 | -6.474 |
| HETATM | 27 | C | UNK | 0001 | 1.609  | -3.248 | -6.471 |
| HETATM | 28 | C | UNK | 0001 | 1.822  | -1.862 | -8.436 |
| HETATM | 29 | C | UNK | 0001 | 1.145  | -0.831 | -7.785 |
| HETATM | 30 | C | UNK | 0001 | 0.926  | -2.218 | -5.805 |
| HETATM | 31 | C | UNK | 0001 | -7.198 | -4.171 | -3.726 |
| HETATM | 32 | C | UNK | 0001 | -5.131 | -6.010 | -3.351 |
| HETATM | 33 | C | UNK | 0001 | -7.395 | -5.517 | -4.034 |
| HETATM | 34 | C | UNK | 0001 | -5.967 | -3.741 | -3.229 |
| HETATM | 35 | C | UNK | 0001 | -4.924 | -4.659 | -3.039 |
| HETATM | 36 | C | UNK | 0001 | -6.364 | -6.435 | -3.848 |
| HETATM | 37 | C | UNK | 0001 | -2.358 | -3.627 | 3.339  |
| HETATM | 38 | C | UNK | 0001 | -3.443 | -3.795 | 5.916  |
| HETATM | 39 | C | UNK | 0001 | -2.469 | -4.868 | 4.002  |
| HETATM | 40 | C | UNK | 0001 | -2.799 | -2.444 | 3.970  |
| HETATM | 41 | C | UNK | 0001 | -3.336 | -2.559 | 5.270  |
| HETATM | 42 | C | UNK | 0001 | -3.010 | -4.950 | 5.281  |
| HETATM | 43 | C | UNK | 0001 | 4.357  | -1.458 | 1.256  |
| HETATM | 44 | C | UNK | 0001 | 6.096  | -3.638 | 1.111  |
| HETATM | 45 | C | UNK | 0001 | 3.930  | -2.650 | 0.651  |
| HETATM | 46 | C | UNK | 0001 | 5.644  | -1.360 | 1.785  |
| HETATM | 47 | C | UNK | 0001 | 6.511  | -2.450 | 1.713  |
| HETATM | 48 | C | UNK | 0001 | 4.810  | -3.740 | 0.579  |

|        |    |    |     |      |        |        |        |
|--------|----|----|-----|------|--------|--------|--------|
| HETATM | 49 | C  | UNK | 0001 | -2.686 | -1.115 | 3.356  |
| HETATM | 50 | C  | UNK | 0001 | -3.449 | -0.000 | 3.751  |
| HETATM | 51 | H  | UNK | 0001 | -4.246 | 0.122  | 4.470  |
| HETATM | 52 | N  | UNK | 0001 | -1.740 | -0.756 | 2.363  |
| HETATM | 53 | N  | UNK | 0001 | -1.872 | 0.543  | 2.292  |
| HETATM | 54 | N  | UNK | 0001 | -2.832 | 1.035  | 3.105  |
| HETATM | 55 | C  | UNK | 0001 | -2.911 | 2.407  | 3.291  |
| HETATM | 56 | C  | UNK | 0001 | -2.736 | 5.117  | 3.657  |
| HETATM | 57 | C  | UNK | 0001 | -3.804 | 3.019  | 4.164  |
| HETATM | 58 | C  | UNK | 0001 | -1.871 | 4.444  | 2.800  |
| HETATM | 59 | C  | UNK | 0001 | -3.714 | 4.397  | 4.340  |
| HETATM | 60 | N  | UNK | 0001 | -1.987 | 3.121  | 2.629  |
| HETATM | 61 | Ir | UNK | 0001 | -0.564 | 1.970  | 1.181  |
| HETATM | 62 | Zn | UNK | 0001 | -0.605 | -3.032 | -1.091 |
| HETATM | 63 | H  | UNK | 0001 | 0.070  | 0.448  | 0.971  |
| HETATM | 64 | B  | UNK | 0001 | 0.629  | 1.816  | 3.075  |
| HETATM | 65 | B  | UNK | 0001 | 0.698  | 3.870  | 0.963  |
| HETATM | 66 | O  | UNK | 0001 | 1.343  | 4.536  | 2.053  |
| HETATM | 67 | O  | UNK | 0001 | 0.963  | 4.514  | -0.313 |
| HETATM | 68 | C  | UNK | 0001 | 2.005  | 5.485  | -0.030 |
| HETATM | 69 | C  | UNK | 0001 | 3.345  | 4.836  | -0.391 |
| HETATM | 70 | C  | UNK | 0001 | 1.784  | 6.692  | -0.942 |
| HETATM | 71 | C  | UNK | 0001 | 1.850  | 5.778  | 1.498  |
| HETATM | 72 | C  | UNK | 0001 | 3.149  | 6.121  | 2.227  |
| HETATM | 73 | C  | UNK | 0001 | 0.810  | 6.864  | 1.810  |
| HETATM | 74 | O  | UNK | 0001 | 1.997  | 1.388  | 3.108  |
| HETATM | 75 | O  | UNK | 0001 | 0.094  | 2.068  | 4.386  |
| HETATM | 76 | C  | UNK | 0001 | 2.232  | 1.054  | 4.496  |
| HETATM | 77 | C  | UNK | 0001 | 1.243  | 1.985  | 5.266  |

|        |     |   |     |      |        |        |        |
|--------|-----|---|-----|------|--------|--------|--------|
| HETATM | 78  | C | UNK | 0001 | 0.776  | 1.445  | 6.616  |
| HETATM | 79  | C | UNK | 0001 | 1.751  | 3.422  | 5.441  |
| HETATM | 80  | C | UNK | 0001 | 3.707  | 1.286  | 4.813  |
| HETATM | 81  | C | UNK | 0001 | 1.908  | -0.440 | 4.634  |
| HETATM | 82  | H | UNK | 0001 | -5.830 | -2.691 | -2.992 |
| HETATM | 83  | H | UNK | 0001 | -8.008 | -3.461 | -3.874 |
| HETATM | 84  | H | UNK | 0001 | -8.355 | -5.852 | -4.422 |
| HETATM | 85  | H | UNK | 0001 | -6.520 | -7.484 | -4.090 |
| HETATM | 86  | H | UNK | 0001 | -4.334 | -6.739 | -3.212 |
| HETATM | 87  | H | UNK | 0001 | -4.552 | 2.457  | 4.716  |
| HETATM | 88  | H | UNK | 0001 | -4.396 | 4.910  | 5.020  |
| HETATM | 89  | H | UNK | 0001 | -2.649 | 6.193  | 3.793  |
| HETATM | 90  | H | UNK | 0001 | -1.107 | 4.942  | 2.235  |
| HETATM | 91  | H | UNK | 0001 | 2.100  | 3.840  | 4.492  |
| HETATM | 92  | H | UNK | 0001 | 2.570  | 3.478  | 6.165  |
| HETATM | 93  | H | UNK | 0001 | 0.944  | 4.079  | 5.785  |
| HETATM | 94  | H | UNK | 0001 | 0.084  | 2.148  | 7.095  |
| HETATM | 95  | H | UNK | 0001 | 1.617  | 1.276  | 7.294  |
| HETATM | 96  | H | UNK | 0001 | 0.213  | 0.512  | 6.505  |
| HETATM | 97  | H | UNK | 0001 | 2.095  | -0.807 | 5.648  |
| HETATM | 98  | H | UNK | 0001 | 2.524  | -1.027 | 3.944  |
| HETATM | 99  | H | UNK | 0001 | 0.866  | -0.650 | 4.369  |
| HETATM | 100 | H | UNK | 0001 | 4.340  | 0.604  | 4.234  |
| HETATM | 101 | H | UNK | 0001 | 4.027  | 2.294  | 4.528  |
| HETATM | 102 | H | UNK | 0001 | 3.918  | 1.132  | 5.875  |
| HETATM | 103 | H | UNK | 0001 | 3.548  | 3.963  | 0.237  |
| HETATM | 104 | H | UNK | 0001 | 4.178  | 5.538  | -0.281 |
| HETATM | 105 | H | UNK | 0001 | 3.338  | 4.486  | -1.429 |
| HETATM | 106 | H | UNK | 0001 | 2.483  | 7.502  | -0.712 |

|        |     |   |     |      |        |        |        |
|--------|-----|---|-----|------|--------|--------|--------|
| HETATM | 107 | H | UNK | 0001 | 1.916  | 6.412  | -1.994 |
| HETATM | 108 | H | UNK | 0001 | 0.760  | 7.073  | -0.870 |
| HETATM | 109 | H | UNK | 0001 | 3.632  | 7.003  | 1.796  |
| HETATM | 110 | H | UNK | 0001 | 3.855  | 5.284  | 2.213  |
| HETATM | 111 | H | UNK | 0001 | 2.956  | 6.320  | 3.288  |
| HETATM | 112 | H | UNK | 0001 | 1.173  | 7.861  | 1.537  |
| HETATM | 113 | H | UNK | 0001 | -0.129 | 6.686  | 1.277  |
| HETATM | 114 | H | UNK | 0001 | 0.564  | 6.871  | 2.878  |
| HETATM | 115 | H | UNK | 0001 | -3.696 | -4.021 | -5.403 |
| HETATM | 116 | H | UNK | 0001 | -1.524 | -2.984 | -6.376 |
| HETATM | 117 | H | UNK | 0001 | 0.167  | -0.194 | -5.992 |
| HETATM | 118 | H | UNK | 0001 | 0.966  | 0.106  | -8.306 |
| HETATM | 119 | H | UNK | 0001 | 2.170  | -1.725 | -9.458 |
| HETATM | 120 | H | UNK | 0001 | 2.583  | -3.872 | -8.290 |
| HETATM | 121 | H | UNK | 0001 | 1.798  | -4.197 | -5.971 |
| HETATM | 122 | H | UNK | 0001 | 3.219  | -1.683 | -4.373 |
| HETATM | 123 | H | UNK | 0001 | 4.354  | -1.839 | -1.975 |
| HETATM | 124 | H | UNK | 0001 | 4.498  | -4.669 | 0.107  |
| HETATM | 125 | H | UNK | 0001 | 6.776  | -4.484 | 1.053  |
| HETATM | 126 | H | UNK | 0001 | 7.516  | -2.375 | 2.123  |
| HETATM | 127 | H | UNK | 0001 | 5.976  | -0.437 | 2.253  |
| HETATM | 128 | H | UNK | 0001 | 3.685  | -0.607 | 1.318  |
| HETATM | 129 | H | UNK | 0001 | 2.695  | -3.447 | 2.834  |
| HETATM | 130 | H | UNK | 0001 | 0.366  | -3.847 | 3.924  |
| HETATM | 131 | H | UNK | 0001 | -3.668 | -1.684 | 5.824  |
| HETATM | 132 | H | UNK | 0001 | -3.860 | -3.853 | 6.919  |
| HETATM | 133 | H | UNK | 0001 | -3.089 | -5.913 | 5.781  |
| HETATM | 134 | H | UNK | 0001 | -2.129 | -5.783 | 3.516  |
| HETATM | 135 | H | UNK | 0001 | -4.476 | -4.432 | 1.890  |

|        |     |   |     |      |        |        |        |
|--------|-----|---|-----|------|--------|--------|--------|
| HETATM | 136 | H | UNK | 0001 | -5.360 | -4.885 | -0.459 |
| HETATM | 137 | C | UNK | 0001 | 0.656  | 1.254  | -0.432 |
| HETATM | 138 | C | UNK | 0001 | 2.188  | 1.374  | -2.721 |
| HETATM | 139 | C | UNK | 0001 | 2.018  | 1.512  | -0.327 |
| HETATM | 140 | C | UNK | 0001 | 0.115  | 0.737  | -1.615 |
| HETATM | 141 | C | UNK | 0001 | 0.882  | 0.894  | -2.781 |
| HETATM | 142 | C | UNK | 0001 | 2.773  | 1.614  | -1.489 |
| HETATM | 143 | C | UNK | 0001 | -1.092 | -0.132 | -1.639 |
| HETATM | 144 | O | UNK | 0001 | -1.313 | -1.043 | -0.758 |
| HETATM | 145 | H | UNK | 0001 | 0.528  | 0.543  | -3.744 |
| HETATM | 146 | H | UNK | 0001 | 2.787  | 1.449  | -3.627 |
| HETATM | 147 | H | UNK | 0001 | 3.828  | 1.871  | -1.427 |
| HETATM | 148 | H | UNK | 0001 | 2.486  | 1.681  | 0.638  |
| HETATM | 149 | B | UNK | 0001 | -2.009 | 3.143  | -0.085 |
| HETATM | 150 | O | UNK | 0001 | -1.958 | 4.603  | -0.208 |
| HETATM | 151 | O | UNK | 0001 | -3.116 | 2.580  | -0.804 |
| HETATM | 152 | C | UNK | 0001 | -3.949 | 3.729  | -1.126 |
| HETATM | 153 | C | UNK | 0001 | -2.936 | 4.914  | -1.226 |
| HETATM | 154 | C | UNK | 0001 | -4.943 | 3.859  | 0.039  |
| HETATM | 155 | C | UNK | 0001 | -4.731 | 3.456  | -2.408 |
| HETATM | 156 | C | UNK | 0001 | -2.158 | 4.977  | -2.546 |
| HETATM | 157 | C | UNK | 0001 | -3.530 | 6.287  | -0.922 |
| HETATM | 158 | N | UNK | 0001 | -2.171 | 0.161  | -2.494 |
| HETATM | 159 | C | UNK | 0001 | -2.099 | 1.024  | -3.661 |
| HETATM | 160 | C | UNK | 0001 | -3.426 | -0.555 | -2.332 |
| HETATM | 161 | H | UNK | 0001 | -1.461 | 1.888  | -3.478 |
| HETATM | 162 | H | UNK | 0001 | -3.098 | 1.377  | -3.926 |
| HETATM | 163 | H | UNK | 0001 | -1.705 | 0.440  | -4.497 |
| HETATM | 164 | H | UNK | 0001 | -4.227 | 0.178  | -2.195 |

|        |     |   |     |      |        |        |        |
|--------|-----|---|-----|------|--------|--------|--------|
| HETATM | 165 | H | UNK | 0001 | -3.629 | -1.129 | -3.238 |
| HETATM | 166 | H | UNK | 0001 | -3.420 | -1.213 | -1.462 |
| HETATM | 167 | H | UNK | 0001 | -1.350 | 5.715  | -2.482 |
| HETATM | 168 | H | UNK | 0001 | -1.671 | 4.022  | -2.766 |
| HETATM | 169 | H | UNK | 0001 | -2.801 | 5.250  | -3.388 |
| HETATM | 170 | H | UNK | 0001 | -5.372 | 4.303  | -2.673 |
| HETATM | 171 | H | UNK | 0001 | -5.674 | 4.655  | -0.136 |
| HETATM | 172 | H | UNK | 0001 | -4.429 | 4.063  | 0.983  |
| HETATM | 173 | H | UNK | 0001 | -4.340 | 6.537  | -1.615 |
| HETATM | 174 | H | UNK | 0001 | -2.762 | 7.067  | -0.995 |
| HETATM | 175 | H | UNK | 0001 | -3.908 | 6.346  | 0.104  |
| HETATM | 176 | H | UNK | 0001 | -5.360 | 2.566  | -2.298 |
| HETATM | 177 | H | UNK | 0001 | -5.489 | 2.920  | 0.187  |
| HETATM | 178 | H | UNK | 0001 | -4.068 | 3.252  | -3.252 |

CONNECT 1 2 3 62

CONNECT 2 1 4 24

CONNECT 3 1 5 6

CONNECT 4 2 5 122

CONNECT 5 3 4 123

CONNECT 6 3 7 45

CONNECT 7 6 8 11

CONNECT 8 7 9 62

CONNECT 9 8 10 12

CONNECT 10 9 11 130

CONNECT 11 7 10 129

CONNECT 12 9 13 37

CONNECT 13 12 14 16

CONNECT 14 13 15 62

CONNECT 15 14 17 18

CONNECT 16 13 17 135  
CONNECT 17 16 15 136  
CONNECT 18 15 19 35  
CONNECT 19 18 20 22  
CONNECT 20 19 21 62  
CONNECT 21 20 23 24  
CONNECT 22 19 23 115  
CONNECT 23 22 21 116  
CONNECT 24 21 2 30  
CONNECT 25 28 27 120  
CONNECT 26 29 30 117  
CONNECT 27 30 25 121  
CONNECT 28 25 29 119  
CONNECT 29 28 26 118  
CONNECT 30 26 27 24  
CONNECT 31 34 33 83  
CONNECT 32 35 36 86  
CONNECT 33 36 31 84  
CONNECT 34 31 35 82  
CONNECT 35 34 32 18  
CONNECT 36 32 33 85  
CONNECT 37 40 39 12  
CONNECT 38 41 42 132  
CONNECT 39 42 37 134  
CONNECT 40 37 41 49  
CONNECT 41 40 38 131  
CONNECT 42 38 39 133  
CONNECT 43 46 45 128  
CONNECT 44 47 48 125

CONNECT 45 48 43 6  
CONNECT 46 43 47 127  
CONNECT 47 46 44 126  
CONNECT 48 44 45 124  
CONNECT 49 40 50 52  
CONNECT 50 49 51 54  
CONNECT 51 50  
CONNECT 52 49 53  
CONNECT 53 52 54 61  
CONNECT 54 53 50 55  
CONNECT 55 57 54 60  
CONNECT 56 58 59 89  
CONNECT 57 59 55 87  
CONNECT 58 56 60 90  
CONNECT 59 56 57 88  
CONNECT 60 58 55 61  
CONNECT 61 53 60 63 64  
CONNECT 61 65 137 149  
CONNECT 62 8 14 20 1  
CONNECT 62 144  
CONNECT 63 61 137  
CONNECT 64 61 74 75  
CONNECT 65 61 66 67  
CONNECT 66 65 71  
CONNECT 67 65 68  
CONNECT 68 67 69 70 71  
CONNECT 69 68 103 104 105  
CONNECT 70 68 106 107 108  
CONNECT 71 68 72 73 66

CONNECT 72 71 109 110 111  
CONNECT 73 71 112 113 114  
CONNECT 74 64 76  
CONNECT 75 64 77  
CONNECT 76 77 80 81 74  
CONNECT 77 76 78 79 75  
CONNECT 78 77 94 95 96  
CONNECT 79 77 91 92 93  
CONNECT 80 76 100 101 102  
CONNECT 81 76 97 98 99  
CONNECT 82 34  
CONNECT 83 31  
CONNECT 84 33  
CONNECT 85 36  
CONNECT 86 32  
CONNECT 87 57  
CONNECT 88 59  
CONNECT 89 56  
CONNECT 90 58  
CONNECT 91 79  
CONNECT 92 79  
CONNECT 93 79  
CONNECT 94 78  
CONNECT 95 78  
CONNECT 96 78  
CONNECT 97 81  
CONNECT 98 81  
CONNECT 99 81  
CONNECT 100 80

CONNECT 101 80  
CONNECT 102 80  
CONNECT 103 69  
CONNECT 104 69  
CONNECT 105 69  
CONNECT 106 70  
CONNECT 107 70  
CONNECT 108 70  
CONNECT 109 72  
CONNECT 110 72  
CONNECT 111 72  
CONNECT 112 73  
CONNECT 113 73  
CONNECT 114 73  
CONNECT 115 22  
CONNECT 116 23  
CONNECT 117 26  
CONNECT 118 29  
CONNECT 119 28  
CONNECT 120 25  
CONNECT 121 27  
CONNECT 122 4  
CONNECT 123 5  
CONNECT 124 48  
CONNECT 125 44  
CONNECT 126 47  
CONNECT 127 46  
CONNECT 128 43  
CONNECT 129 11

CONNECT 130 10  
CONNECT 131 41  
CONNECT 132 38  
CONNECT 133 42  
CONNECT 134 39  
CONNECT 135 16  
CONNECT 136 17  
CONNECT 137 140 139 61 63  
CONNECT 138 141 142 146  
CONNECT 139 142 137 148  
CONNECT 140 137 141 143  
CONNECT 141 140 138 145  
CONNECT 142 138 139 147  
CONNECT 143 140 144 158  
CONNECT 144 143 62  
CONNECT 145 141  
CONNECT 146 138  
CONNECT 147 142  
CONNECT 148 139  
CONNECT 149 61 151 150  
CONNECT 150 153 149  
CONNECT 151 149 152  
CONNECT 152 151 153 154 155  
CONNECT 153 152 150 156 157  
CONNECT 154 152 171 172 177  
CONNECT 155 152 170 176 178  
CONNECT 156 153 167 168 169  
CONNECT 157 153 173 174 175  
CONNECT 158 143 159 160

CONNECT 159 158 161 162 163

CONNECT 160 158 164 165 166

CONNECT 161 159

CONNECT 162 159

CONNECT 163 159

CONNECT 164 160

CONNECT 165 160

CONNECT 166 160

CONNECT 167 156

CONNECT 168 156

CONNECT 169 156

CONNECT 170 155

CONNECT 171 154

CONNECT 172 154

CONNECT 173 157

CONNECT 174 157

CONNECT 175 157

CONNECT 176 155

CONNECT 177 154

CONNECT 178 155

## 6. Computational details.

All the DFT calculations were performed with the Gaussian 16 set of programs.<sup>21</sup> Geometry optimizations were performed without symmetry constraints. Analytical frequency calculations were then carried out for the characterization of the located stationary points. These frequencies were used to calculate unscaled zero-point energies (ZPEs) as well as thermal corrections and entropy effects at 353.15 K. For this calculations, we used the BP86 functional of Becke and Perdew,<sup>22-24</sup> together with the Grimme D3 correction term to the electronic energy.<sup>25</sup> The electronic configuration of the molecular systems was described with the double- $\zeta$  basis set with polarization of Ahlrichs for main-group atoms (Def2SVP keyword in Gaussian),<sup>26</sup> whereas for iridium the small-core quasi-relativistic Stuttgart/Dresden effective core potential, with an associated valence basis set (standard SDD keywords in Gaussian16) were employed.<sup>27-29</sup> Energies were obtained by single-point calculations on the optimized geometries with the M06L functional,<sup>30</sup> coupled with the Def2TZVP basis set.<sup>31</sup> Solvent corrections were considered using the polarization continuum solvation model (PCM),<sup>32,33</sup> using p-xylene as the solvent. The reported free energies in this work include energies obtained at the M06L/Def2TZVP~sdd level of theory (with solvent corrections included) corrected with zero-point energies, thermal corrections and entropy effects evaluated at 353.15 K, achieved at the BP86-D3/Def2SVP~sdd level. Other four functionals (B3LYP-D3//SMD, B3LYP-D3//PCM, PBEPBE-D3BJ//SMD and M06L//SMD) led to less accurate data.

**Table S2.** NCI plots for a selected list of intermediates and transitions states. The isosurface represents a value of 0.5 with a color scale for the reduced density gradient from -0.05 to 0.05.

A

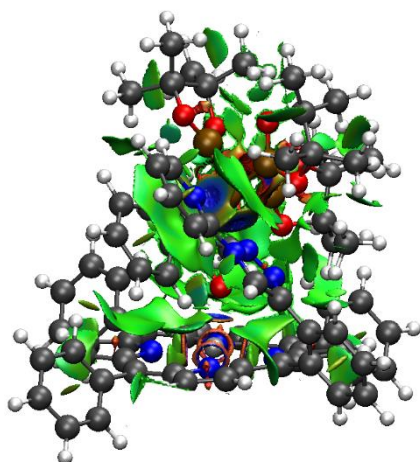

TS<sub>AB</sub>

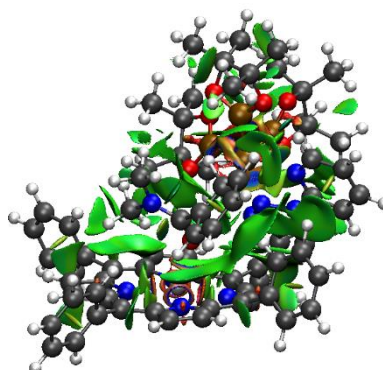

B

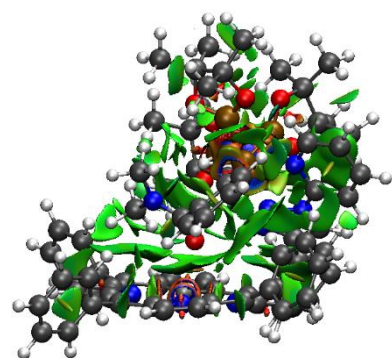

TS<sub>BC</sub>

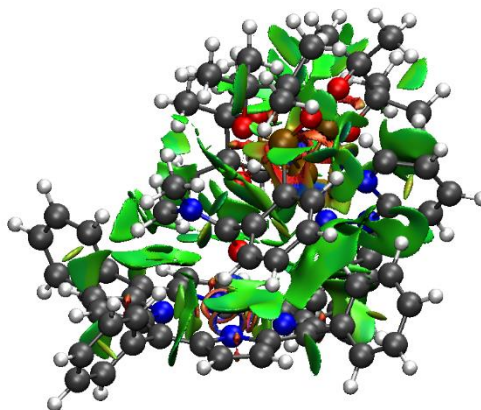

C

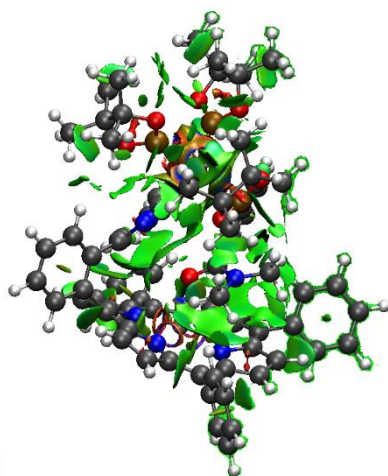

TS<sub>CD</sub>

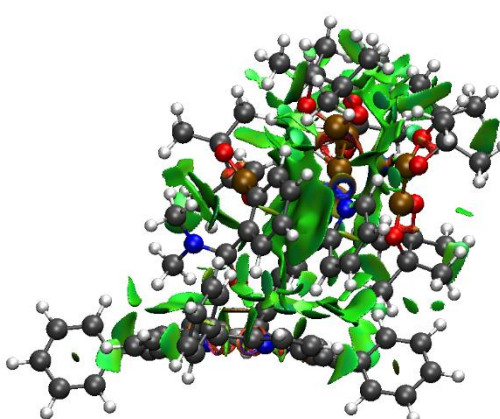

D

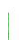

D'

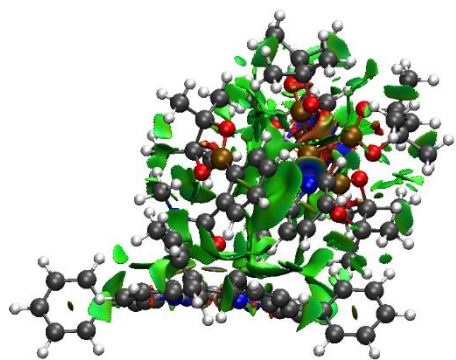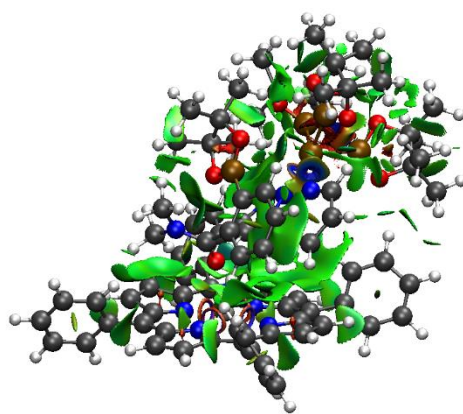

**Table S3.** xyz coordinates and absolute energies (in a.u.) of all optimized geometries.

## Ir-1

Thermal correction to Gibbs Free Energy= 1.224983

SCF Done: -5831.35899691 A.U.

|   |           |           |           |
|---|-----------|-----------|-----------|
| N | 2.720589  | -0.716300 | -0.480008 |
| C | 3.150229  | -0.453300 | -1.767668 |
| C | 3.796415  | -1.261770 | 0.197367  |
| C | 4.542362  | -0.845728 | -1.909289 |
| C | 3.790329  | -1.719867 | 1.539867  |
| C | 2.661582  | -1.705119 | 2.398277  |
| N | 1.399118  | -1.252804 | 2.064137  |
| C | 0.628923  | -1.334099 | 3.207579  |
| C | 1.425677  | -1.866112 | 4.299187  |
| C | 2.682192  | -2.105178 | 3.796632  |
| C | -0.725052 | -0.941606 | 3.321001  |
| C | -1.532585 | -0.466269 | 2.260140  |
| N | -1.117019 | -0.257117 | 0.960528  |
| C | -2.223829 | 0.168113  | 0.248959  |
| C | -2.951419 | -0.172604 | 2.374415  |
| C | -3.381245 | 0.215858  | 1.126883  |
| C | -2.238028 | 0.533303  | -1.118708 |
| C | -1.115677 | 0.499148  | -1.983098 |
| N | 0.156858  | 0.073057  | -1.644757 |
| C | 0.960514  | 0.309966  | -2.744959 |
| C | -1.117587 | 1.011762  | -3.341997 |
| C | 0.168975  | 0.898701  | -3.813207 |
| C | 2.353833  | 0.058737  | -2.823563 |
| C | 3.351471  | -0.097706 | -6.510825 |
| C | 4.038178  | 1.345050  | -4.201365 |
| C | 2.705189  | -0.370717 | -5.293913 |
| C | 4.342553  | 0.898027  | -6.577256 |
| C | 4.683974  | 1.618249  | -5.418455 |
| C | 3.038879  | 0.347557  | -4.122442 |
| C | -5.176203 | 2.875350  | -1.771627 |
| C | -4.268493 | 0.357360  | -2.624488 |
| C | -5.920941 | 2.145869  | -2.716217 |
| C | -3.981948 | 2.348638  | -1.252092 |
| C | -3.517376 | 1.080861  | -1.672050 |
| C | -5.463304 | 0.886028  | -3.142226 |
| C | -1.371941 | -1.059900 | 4.665373  |
| C | -2.689736 | -1.341869 | 7.160039  |
| C | -1.652265 | -2.335657 | 5.200719  |
| C | -1.754733 | 0.094539  | 5.403558  |
| C | -2.412219 | -0.067089 | 6.645895  |
| C | -2.303728 | -2.483004 | 6.435413  |
| C | 6.197684  | -1.392997 | 2.237146  |
| C | 6.396315  | -4.071821 | 3.054249  |
| C | 5.075817  | -2.242843 | 2.099429  |
| C | 7.400018  | -1.874262 | 2.779820  |
| C | 7.503224  | -3.215070 | 3.191588  |
| C | 5.193095  | -3.589954 | 2.512619  |
| C | -1.491819 | 1.461981  | 4.917097  |

|    |           |           |           |
|----|-----------|-----------|-----------|
| C  | -2.336755 | 2.563322  | 5.006270  |
| H  | -3.360596 | 2.664009  | 5.372629  |
| N  | -0.297426 | 1.867367  | 4.363231  |
| N  | -0.357988 | 3.149868  | 4.134751  |
| N  | -1.609498 | 3.610356  | 4.502347  |
| C  | -1.879080 | 4.985941  | 4.470824  |
| C  | -2.201548 | 7.708323  | 4.575607  |
| C  | -3.129143 | 5.497222  | 4.869699  |
| C  | -0.999340 | 7.120257  | 4.179619  |
| C  | -3.296030 | 6.884184  | 4.912178  |
| N  | -0.830332 | 5.770875  | 4.102372  |
| Ir | 1.127719  | 4.727354  | 3.928433  |
| Zn | 0.804422  | -0.491538 | 0.245280  |
| B  | 2.716956  | 3.639342  | 4.662231  |
| B  | 0.978896  | 4.870376  | 6.009633  |
| B  | 2.390958  | 6.330865  | 4.066155  |
| O  | 1.953440  | 7.668613  | 4.160179  |
| O  | 3.792188  | 6.301262  | 4.014705  |
| C  | 4.277089  | 7.584429  | 4.482708  |
| C  | 4.406590  | 7.473907  | 6.012201  |
| C  | 5.630841  | 7.875219  | 3.836999  |
| C  | 3.105385  | 8.546339  | 4.047777  |
| C  | 2.893674  | 9.756688  | 4.957628  |
| C  | 3.204696  | 8.981407  | 2.576690  |
| O  | 1.144614  | 6.017832  | 6.781880  |
| O  | 0.484470  | 3.813511  | 6.786509  |
| C  | 0.996311  | 5.652591  | 8.184313  |
| C  | 0.132094  | 4.328643  | 8.094757  |
| C  | 0.465060  | 3.264189  | 9.140593  |
| C  | -1.381752 | 4.600183  | 8.061644  |
| C  | 0.320546  | 6.810447  | 8.919953  |
| C  | 2.409057  | 5.407969  | 8.732492  |
| H  | -3.384605 | 2.921173  | -0.523584 |
| H  | -5.523515 | 3.867362  | -1.440853 |
| H  | -6.857182 | 2.560341  | -3.122970 |
| H  | -6.042040 | 0.308693  | -3.880930 |
| H  | -3.906212 | -0.629378 | -2.953682 |
| H  | -3.947572 | 4.819013  | 5.146353  |
| H  | -4.260720 | 7.316614  | 5.217634  |
| H  | -2.278604 | 8.804689  | 4.614270  |
| H  | -0.098135 | 7.706415  | 3.937701  |
| H  | -1.623541 | 5.379392  | 7.310843  |
| H  | -1.775469 | 4.921286  | 9.047319  |
| H  | -1.899053 | 3.666111  | 7.759573  |
| H  | -0.177798 | 2.373948  | 8.984154  |
| H  | 0.291293  | 3.644919  | 10.168560 |
| H  | 1.518404  | 2.937431  | 9.053414  |
| H  | 2.397754  | 5.132088  | 9.806386  |
| H  | 3.005200  | 6.334844  | 8.616546  |
| H  | 2.910215  | 4.617396  | 8.143602  |
| H  | 0.994891  | 7.690512  | 8.928523  |
| H  | -0.621652 | 7.113208  | 8.424888  |
| H  | 0.100836  | 6.533968  | 9.972298  |
| H  | 3.414516  | 7.271583  | 6.463713  |
| H  | 4.845583  | 8.387196  | 6.463612  |

|   |           |           |           |
|---|-----------|-----------|-----------|
| H | 5.055420  | 6.607823  | 6.248322  |
| H | 5.981832  | 8.895868  | 4.096567  |
| H | 6.381955  | 7.147237  | 4.205267  |
| H | 5.583696  | 7.782939  | 2.735067  |
| H | 3.807199  | 10.386210 | 4.995843  |
| H | 2.632888  | 9.440626  | 5.985009  |
| H | 2.062210  | 10.381669 | 4.571338  |
| H | 4.017751  | 9.717958  | 2.413482  |
| H | 3.382497  | 8.105059  | 1.921155  |
| H | 2.244756  | 9.446465  | 2.273342  |
| H | -1.989714 | 1.430042  | -3.856967 |
| H | 0.555691  | 1.210061  | -4.789910 |
| H | 4.299579  | 1.910831  | -3.293307 |
| H | 5.455958  | 2.403006  | -5.462885 |
| H | 4.849190  | 1.112136  | -7.531703 |
| H | 3.083060  | -0.671141 | -7.412469 |
| H | 1.934239  | -1.155166 | -5.237126 |
| H | 5.128824  | -0.774633 | -2.832077 |
| H | 4.326622  | -4.260225 | 2.399202  |
| H | 6.471189  | -5.125708 | 3.366574  |
| H | 8.446032  | -3.592533 | 3.618344  |
| H | 8.259936  | -1.194292 | 2.888302  |
| H | 6.110305  | -0.341350 | 1.925037  |
| H | 3.557056  | -2.482306 | 4.336983  |
| H | 1.075420  | -2.015496 | 5.326199  |
| H | -2.676582 | 0.831059  | 7.226591  |
| H | -3.195413 | -1.444156 | 8.133024  |
| H | -2.513574 | -3.489930 | 6.829258  |
| H | -1.359737 | -3.222878 | 4.617773  |
| H | -3.545043 | -0.273294 | 3.290141  |
| H | -4.393690 | 0.500135  | 0.819085  |
| O | 3.468380  | 3.946200  | 5.813657  |
| O | 3.096318  | 2.385186  | 4.167770  |
| C | 4.506632  | 2.941989  | 5.955277  |
| C | 3.858024  | 1.718532  | 5.210389  |
| C | 5.756827  | 3.486145  | 5.244710  |
| C | 4.790882  | 2.706607  | 7.438691  |
| C | 4.843488  | 0.754467  | 4.557616  |
| C | 2.834288  | 0.972544  | 6.083163  |
| H | 3.866274  | 2.459203  | 7.993625  |
| H | 5.230243  | 3.618445  | 7.891877  |
| H | 5.512800  | 1.873536  | 7.569193  |
| H | 6.014542  | 4.471654  | 5.681217  |
| H | 5.553277  | 3.644088  | 4.167180  |
| H | 6.627541  | 2.808266  | 5.358791  |
| H | 5.480516  | 1.271322  | 3.815132  |
| H | 4.286467  | -0.041233 | 4.027646  |
| H | 5.497596  | 0.272640  | 5.313598  |
| H | 3.321815  | 0.341357  | 6.854607  |
| H | 2.143889  | 1.692160  | 6.569734  |
| H | 2.225503  | 0.326258  | 5.423213  |
| C | 4.940507  | -1.351612 | -0.694798 |
| H | 5.916613  | -1.774112 | -0.432121 |
| C | -1.601382 | 4.674517  | 1.317823  |
| C | -1.244581 | 3.385989  | 1.138379  |

|   |           |          |           |
|---|-----------|----------|-----------|
| C | -0.010902 | 2.890278 | 0.436209  |
| C | 1.201860  | 2.622100 | 1.346739  |
| C | 1.914930  | 3.840234 | 1.906272  |
| C | 1.665899  | 5.210745 | 1.665813  |
| C | 0.682238  | 5.891369 | 0.705740  |
| C | -0.846403 | 5.925419 | 0.944001  |
| H | -2.563065 | 4.866273 | 1.829154  |
| H | -1.903521 | 2.603427 | 1.558074  |
| H | 2.956126  | 3.606714 | 2.175203  |
| H | 2.577264  | 5.824685 | 1.773686  |
| H | -0.266307 | 1.941626 | -0.064325 |
| H | 0.282349  | 3.575530 | -0.382086 |
| H | 0.932982  | 1.920662 | 2.168386  |
| H | 1.962668  | 2.068312 | 0.744164  |
| H | 0.995509  | 6.955792 | 0.652081  |
| H | 0.887411  | 5.487337 | -0.310806 |
| H | -1.049732 | 6.672719 | 1.737760  |
| H | -1.312788 | 6.366809 | 0.030495  |

## COD

Thermal correction to Gibbs Free Energy= 0.135201  
SCF Done: -312.06501155 A.U.

|   |           |          |           |
|---|-----------|----------|-----------|
| C | -1.487188 | 4.692933 | 1.375935  |
| C | -1.202741 | 3.401471 | 1.095592  |
| C | -0.013038 | 2.827985 | 0.351294  |
| C | 1.252009  | 2.669547 | 1.228127  |
| C | 1.864115  | 3.914273 | 1.826332  |
| C | 1.658700  | 5.219629 | 1.541374  |
| C | 0.715353  | 5.835596 | 0.527087  |
| C | -0.742586 | 5.960915 | 1.029935  |
| H | -2.417022 | 4.872504 | 1.948296  |
| H | -1.911875 | 2.650499 | 1.490726  |
| H | 2.601823  | 3.700891 | 2.623002  |
| H | 2.226552  | 5.946060 | 2.151931  |
| H | -0.286076 | 1.821101 | -0.030106 |
| H | 0.227261  | 3.426951 | -0.548978 |
| H | 1.017332  | 1.973791 | 2.066881  |
| H | 2.037217  | 2.138567 | 0.637322  |
| H | 1.076103  | 6.857484 | 0.283269  |
| H | 0.734947  | 5.281364 | -0.431747 |
| H | -0.751425 | 6.613514 | 1.933643  |
| H | -1.338904 | 6.525464 | 0.272845  |

## B<sub>2</sub>pin<sub>2</sub>

Thermal correction to Gibbs Free Energy= 0.290388  
SCF Done: -822.729730458 A.U.

|   |           |          |          |
|---|-----------|----------|----------|
| B | -3.746289 | 6.412156 | 5.448946 |
| C | -3.752023 | 5.228665 | 7.415478 |

|   |           |           |          |
|---|-----------|-----------|----------|
| C | -5.147912 | 5.081289  | 6.686784 |
| B | -3.186671 | 7.411992  | 4.175063 |
| C | -2.407699 | 8.034555  | 2.107825 |
| C | -2.558333 | 9.304329  | 3.038370 |
| C | -1.341281 | 10.229029 | 3.068592 |
| H | -1.127588 | 10.626680 | 2.054846 |
| H | -1.538573 | 11.087331 | 3.741942 |
| H | -0.441587 | 9.705833  | 3.442948 |
| C | -3.837694 | 10.108692 | 2.758485 |
| H | -3.991605 | 10.833549 | 3.582560 |
| H | -3.770860 | 10.669339 | 1.804326 |
| H | -4.723899 | 9.443961  | 2.719970 |
| C | -0.958724 | 7.533192  | 2.001257 |
| H | -0.961736 | 6.528450  | 1.533612 |
| H | -0.334263 | 8.208000  | 1.381666 |
| H | -0.495876 | 7.440199  | 3.004182 |
| C | -3.027481 | 8.177135  | 0.717538 |
| H | -2.551768 | 9.011312  | 0.161370 |
| H | -2.872097 | 7.243766  | 0.139885 |
| H | -4.116508 | 8.361979  | 0.774079 |
| C | -3.129347 | 3.914346  | 7.886647 |
| H | -2.158982 | 4.115601  | 8.383536 |
| H | -3.793290 | 3.407102  | 8.616967 |
| H | -2.939982 | 3.227258  | 7.040841 |
| C | -3.774117 | 6.253525  | 8.560593 |
| H | -4.327727 | 5.873214  | 9.442734 |
| H | -2.731161 | 6.470721  | 8.865831 |
| H | -4.237040 | 7.205677  | 8.232348 |
| C | -6.367491 | 5.329304  | 7.574638 |
| H | -7.295503 | 5.203219  | 6.981428 |
| H | -6.392975 | 4.604851  | 8.414873 |
| H | -6.367833 | 6.354854  | 7.988915 |
| C | -5.296248 | 3.752139  | 5.929446 |
| H | -5.433610 | 2.897051  | 6.621714 |
| H | -6.182574 | 3.815275  | 5.267213 |
| H | -4.410140 | 3.556841  | 5.292811 |
| O | -2.724303 | 8.701375  | 4.360696 |
| O | -3.149054 | 7.016029  | 2.851227 |
| O | -2.910897 | 5.798054  | 6.362791 |
| O | -5.081350 | 6.133493  | 5.672712 |

### NMe<sub>2</sub>C(=O)Ph

Thermal correction to Gibbs Free Energy= 0.132249  
 SCF Done: -479.6711441 A.U.

|   |           |           |           |
|---|-----------|-----------|-----------|
| C | 0.359305  | 0.495023  | -0.010858 |
| C | 1.682538  | 0.616485  | 0.467070  |
| C | 2.294197  | 1.878784  | 0.552342  |
| C | 1.593452  | 3.029845  | 0.150991  |
| C | 0.269730  | 2.916784  | -0.314332 |
| C | -0.348884 | 1.659113  | -0.378807 |
| H | 2.229448  | -0.282031 | 0.794194  |
| H | 3.322236  | 1.964414  | 0.939112  |
| H | 2.075767  | 4.018490  | 0.210861  |

|   |           |           |           |
|---|-----------|-----------|-----------|
| H | -0.286543 | 3.817717  | -0.618503 |
| H | -1.395466 | 1.558171  | -0.705140 |
| C | -0.390774 | -0.818237 | -0.004028 |
| O | -1.527596 | -0.870619 | 0.475272  |
| N | 0.254460  | -1.937551 | -0.510229 |
| C | 1.418936  | -1.912545 | -1.383550 |
| H | 1.699384  | -0.875303 | -1.640436 |
| H | 2.298447  | -2.411625 | -0.915930 |
| H | 1.192081  | -2.450160 | -2.332248 |
| C | -0.389991 | -3.235199 | -0.359678 |
| H | 0.337695  | -3.983369 | 0.024466  |
| H | -1.233817 | -3.132310 | 0.346900  |
| H | -0.786088 | -3.605881 | -1.333062 |

## A

Thermal correction to Gibbs Free Energy= 1.224793  
 SCF Done: -5995.53986227 A.U.

|   |           |           |           |
|---|-----------|-----------|-----------|
| N | 2.664463  | -0.673619 | -0.226126 |
| C | 3.157213  | -0.108302 | -1.380162 |
| C | 3.681337  | -1.422917 | 0.323917  |
| C | 4.525263  | -0.555223 | -1.602394 |
| C | 3.640289  | -2.072260 | 1.587486  |
| C | 2.520695  | -2.085254 | 2.463201  |
| N | 1.275109  | -1.570613 | 2.183793  |
| C | 0.519360  | -1.697791 | 3.326035  |
| C | 1.313836  | -2.321638 | 4.376502  |
| C | 2.552473  | -2.574559 | 3.837422  |
| C | -0.825847 | -1.275803 | 3.471438  |
| C | -1.620227 | -0.672577 | 2.460518  |
| N | -1.184975 | -0.291458 | 1.210144  |
| C | -2.262866 | 0.270779  | 0.556348  |
| C | -3.034205 | -0.362104 | 2.601258  |
| C | -3.434296 | 0.222922  | 1.421319  |
| C | -2.219605 | 0.914956  | -0.710722 |
| C | -1.040131 | 1.119454  | -1.477217 |
| N | 0.223106  | 0.679831  | -1.140792 |
| C | 1.073629  | 1.089276  | -2.146383 |
| C | -0.986902 | 1.832069  | -2.747367 |
| C | 0.329182  | 1.844298  | -3.143891 |
| C | 2.451778  | 0.767904  | -2.245015 |
| C | 3.796272  | 1.608172  | -5.732098 |
| C | 4.218294  | 2.363228  | -3.062362 |
| C | 3.039331  | 1.016036  | -4.706699 |
| C | 4.766061  | 2.579645  | -5.425550 |
| C | 4.976023  | 2.955026  | -4.086378 |
| C | 3.238516  | 1.388049  | -3.358416 |

|    |           |           |           |
|----|-----------|-----------|-----------|
| C  | -4.903383 | 3.326744  | -1.992916 |
| C  | -4.589687 | 0.579186  | -1.518064 |
| C  | -5.971525 | 2.448665  | -2.249770 |
| C  | -3.684497 | 2.834148  | -1.498062 |
| C  | -3.508068 | 1.451602  | -1.249740 |
| C  | -5.808936 | 1.072092  | -2.011272 |
| C  | -1.469469 | -1.463970 | 4.808635  |
| C  | -2.793170 | -1.845319 | 7.290807  |
| C  | -1.749971 | -2.759782 | 5.293528  |
| C  | -1.850853 | -0.342516 | 5.599584  |
| C  | -2.515278 | -0.549807 | 6.829589  |
| C  | -2.402652 | -2.955100 | 6.521221  |
| C  | 6.067679  | -1.960763 | 2.289251  |
| C  | 6.103721  | -4.712449 | 2.841996  |
| C  | 4.894961  | -2.723058 | 2.075735  |
| C  | 7.239724  | -2.564021 | 2.772946  |
| C  | 7.262039  | -3.942555 | 3.051478  |
| C  | 4.931068  | -4.108151 | 2.359334  |
| C  | -1.585550 | 1.038952  | 5.151684  |
| C  | -2.467675 | 2.115038  | 5.141308  |
| H  | -3.524894 | 2.184324  | 5.407231  |
| N  | -0.366718 | 1.470719  | 4.673806  |
| N  | -0.453277 | 2.733047  | 4.384403  |
| N  | -1.740931 | 3.164781  | 4.647070  |
| C  | -2.069653 | 4.527587  | 4.498085  |
| C  | -2.518755 | 7.228293  | 4.302737  |
| C  | -3.348901 | 5.014979  | 4.821015  |
| C  | -1.284179 | 6.652790  | 3.980008  |
| C  | -3.573055 | 6.393511  | 4.716584  |
| N  | -1.061197 | 5.319018  | 4.066539  |
| Ir | 0.969442  | 4.370026  | 3.984472  |
| Zn | 0.828282  | -0.229790 | 0.650733  |
| B  | 2.655469  | 3.353068  | 4.540713  |
| B  | 1.028986  | 4.802438  | 5.958126  |
| B  | 2.181571  | 5.987015  | 3.760519  |
| O  | 1.721010  | 7.322436  | 3.766303  |
| O  | 3.567814  | 5.981632  | 3.505082  |
| C  | 4.073280  | 7.317484  | 3.759919  |
| C  | 4.444506  | 7.366733  | 5.252447  |
| C  | 5.300042  | 7.563452  | 2.882380  |
| C  | 2.815704  | 8.207690  | 3.416978  |
| C  | 2.694848  | 9.490370  | 4.240793  |
| C  | 2.692038  | 8.515278  | 1.915352  |
| O  | 1.429678  | 5.997948  | 6.552822  |
| O  | 0.403677  | 3.959529  | 6.890753  |
| C  | 1.280451  | 5.854813  | 7.991894  |
| C  | 0.164537  | 4.738984  | 8.091666  |
| C  | 0.277373  | 3.821618  | 9.308303  |
| C  | -1.260284 | 5.307872  | 7.964481  |
| C  | 0.887257  | 7.210565  | 8.578965  |
| C  | 2.637399  | 5.391916  | 8.539927  |
| H  | -2.851378 | 3.522959  | -1.291553 |
| H  | -5.020278 | 4.407154  | -2.175812 |
| H  | -6.927160 | 2.835433  | -2.638171 |
| H  | -6.635866 | 0.373994  | -2.218461 |

|   |           |           |           |
|---|-----------|-----------|-----------|
| H | -4.458417 | -0.499630 | -1.339763 |
| H | -4.145096 | 4.336024  | 5.154443  |
| H | -4.560131 | 6.810434  | 4.968136  |
| H | -2.647622 | 8.317744  | 4.226418  |
| H | -0.407441 | 7.244531  | 3.670060  |
| H | -1.334912 | 5.985476  | 7.089035  |
| H | -1.577112 | 5.861176  | 8.871835  |
| H | -1.963804 | 4.465944  | 7.801884  |
| H | -0.543664 | 3.076057  | 9.296122  |
| H | 0.205126  | 4.402976  | 10.251061 |
| H | 1.235695  | 3.269036  | 9.301346  |
| H | 2.632082  | 5.299015  | 9.644887  |
| H | 3.409672  | 6.132497  | 8.251038  |
| H | 2.922200  | 4.426996  | 8.081245  |
| H | 1.727157  | 7.925178  | 8.462535  |
| H | 0.007217  | 7.637691  | 8.061608  |
| H | 0.659372  | 7.120039  | 9.661537  |
| H | 3.546939  | 7.178263  | 5.875718  |
| H | 4.905655  | 8.334497  | 5.537550  |
| H | 5.165599  | 6.551512  | 5.459892  |
| H | 5.654154  | 8.610702  | 2.981821  |
| H | 6.123232  | 6.889969  | 3.196017  |
| H | 5.086040  | 7.362084  | 1.814940  |
| H | 3.582407  | 10.140744 | 4.094211  |
| H | 2.592361  | 9.259490  | 5.317538  |
| H | 1.795836  | 10.059926 | 3.926995  |
| H | 3.446053  | 9.253742  | 1.574768  |
| H | 2.808491  | 7.591469  | 1.313045  |
| H | 1.683088  | 8.929944  | 1.715003  |
| H | -1.844734 | 2.261181  | -3.276334 |
| H | 0.752561  | 2.299727  | -4.046138 |
| H | 4.374255  | 2.653358  | -2.011456 |
| H | 5.733317  | 3.715818  | -3.837770 |
| H | 5.359810  | 3.042229  | -6.229961 |
| H | 3.631985  | 1.303321  | -6.778071 |
| H | 2.286176  | 0.247752  | -4.941952 |
| H | 5.147710  | -0.287923 | -2.464088 |
| H | 4.023527  | -4.709055 | 2.191724  |
| H | 6.114148  | -5.794039 | 3.051888  |
| H | 8.180997  | -4.416327 | 3.431860  |
| H | 8.139721  | -1.951105 | 2.940998  |
| H | 6.043021  | -0.880081 | 2.082920  |
| H | 3.422340  | -3.015454 | 4.336836  |
| H | 0.977208  | -2.519285 | 5.400312  |
| H | -2.787331 | 0.325430  | 7.441137  |
| H | -3.304014 | -1.988241 | 8.255948  |
| H | -2.613841 | -3.977101 | 6.873667  |
| H | -1.459586 | -3.622858 | 4.674581  |
| H | -3.646589 | -0.576640 | 3.485025  |
| H | -4.431027 | 0.599120  | 1.164675  |
| O | 3.445904  | 3.695225  | 5.662865  |
| O | 3.046835  | 2.099141  | 4.059870  |
| C | 4.465297  | 2.675097  | 5.829035  |
| C | 3.794378  | 1.442487  | 5.118450  |
| C | 5.722812  | 3.176932  | 5.100442  |

|   |           |           |           |
|---|-----------|-----------|-----------|
| C | 4.749422  | 2.473740  | 7.317471  |
| C | 4.759017  | 0.426446  | 4.512257  |
| C | 2.757551  | 0.733238  | 6.007422  |
| H | 3.820281  | 2.260644  | 7.879051  |
| H | 5.208934  | 3.387406  | 7.746384  |
| H | 5.453372  | 1.628810  | 7.468793  |
| H | 5.999914  | 4.168974  | 5.510246  |
| H | 5.515204  | 3.308553  | 4.019563  |
| H | 6.583334  | 2.488398  | 5.227386  |
| H | 5.457579  | 0.892433  | 3.792899  |
| H | 4.185166  | -0.354738 | 3.976033  |
| H | 5.355676  | -0.071418 | 5.304354  |
| H | 3.236676  | 0.117034  | 6.795913  |
| H | 2.077196  | 1.472408  | 6.477675  |
| H | 2.138825  | 0.078485  | 5.363950  |
| C | 4.845070  | -1.384555 | -0.552195 |
| H | 5.780784  | -1.931769 | -0.391896 |
| O | 1.447867  | 1.420531  | 1.729518  |
| C | 1.808278  | 2.582040  | 1.419048  |
| C | 0.730062  | 3.643360  | 1.377660  |
| N | 3.108991  | 2.830436  | 1.092633  |
| C | 0.886279  | 5.058609  | 1.283640  |
| C | -0.601081 | 3.130900  | 1.353693  |
| C | 3.660077  | 4.104015  | 0.637676  |
| C | 4.098617  | 1.776397  | 1.307928  |
| C | -0.233282 | 5.891864  | 1.051168  |
| H | 1.875717  | 5.520838  | 1.286994  |
| C | -1.704734 | 3.964337  | 1.174423  |
| H | -0.727951 | 2.048484  | 1.476885  |
| H | 3.023278  | 4.559676  | -0.144851 |
| H | 3.804007  | 4.813684  | 1.483468  |
| H | 4.648312  | 3.903705  | 0.180178  |
| H | 4.896757  | 2.163118  | 1.973805  |
| H | 3.612094  | 0.917978  | 1.795329  |
| H | 4.542907  | 1.455177  | 0.341430  |
| C | -1.521661 | 5.352830  | 0.989000  |
| H | -0.070101 | 6.975382  | 0.951816  |
| H | -2.712035 | 3.520890  | 1.159003  |
| H | -2.390011 | 6.009344  | 0.820362  |

## TS<sub>AB</sub>

Thermal correction to Gibbs Free Energy= 1.221979  
 SCF Done: 5998.91460995 A.U.

|   |          |           |           |
|---|----------|-----------|-----------|
| N | 2.605312 | -1.186793 | -0.375600 |
| C | 2.973715 | -0.859470 | -1.666081 |
| C | 3.679777 | -1.834638 | 0.198616  |
| C | 4.329598 | -1.326841 | -1.919402 |
| C | 3.754935 | -2.296180 | 1.539161  |
| C | 2.700646 | -2.241106 | 2.486289  |
| N | 1.433651 | -1.753305 | 2.246169  |
| C | 0.736495 | -1.839231 | 3.430806  |
| C | 1.598414 | -2.392273 | 4.467879  |
| C | 2.814786 | -2.648432 | 3.880084  |

|    |           |           |           |
|----|-----------|-----------|-----------|
| C  | -0.606953 | -1.426506 | 3.628439  |
| C  | -1.431406 | -0.808826 | 2.651194  |
| N  | -1.007938 | -0.383901 | 1.415473  |
| C  | -1.970103 | 0.470145  | 0.934153  |
| C  | -2.786593 | -0.326511 | 2.895955  |
| C  | -3.102895 | 0.507555  | 1.849627  |
| C  | -1.887596 | 1.232620  | -0.255640 |
| C  | -0.922104 | 1.052793  | -1.277537 |
| N  | 0.204257  | 0.271144  | -1.171443 |
| C  | 0.898287  | 0.400830  | -2.352935 |
| C  | -0.970454 | 1.677405  | -2.591184 |
| C  | 0.142270  | 1.242059  | -3.275603 |
| C  | 2.191826  | -0.128732 | -2.601450 |
| C  | 3.632654  | -0.580471 | -6.115467 |
| C  | 3.175020  | 1.490108  | -4.275865 |
| C  | 3.047657  | -0.863783 | -4.869717 |
| C  | 3.989191  | 0.739268  | -6.445948 |
| C  | 3.758067  | 1.774252  | -5.521942 |
| C  | 2.810442  | 0.167574  | -3.932879 |
| C  | -3.153276 | 4.742272  | 0.394011  |
| C  | -3.923934 | 2.520135  | -1.151570 |
| C  | -4.301102 | 4.816358  | -0.416482 |
| C  | -2.400281 | 3.559329  | 0.439574  |
| C  | -2.775253 | 2.436991  | -0.338007 |
| C  | -4.685192 | 3.703347  | -1.186622 |
| C  | -1.129483 | -1.464223 | 5.028957  |
| C  | -2.111074 | -1.515787 | 7.693273  |
| C  | -1.338474 | -2.685534 | 5.705173  |
| C  | -1.419171 | -0.247199 | 5.713875  |
| C  | -1.911278 | -0.291264 | 7.037239  |
| C  | -1.822540 | -2.717416 | 7.023154  |
| C  | 6.176803  | -1.952753 | 2.156597  |
| C  | 6.469391  | -4.660292 | 2.836883  |
| C  | 5.071694  | -2.823940 | 2.017367  |
| C  | 7.411056  | -2.427794 | 2.629743  |
| C  | 7.561167  | -3.783882 | 2.971710  |
| C  | 5.234776  | -4.184012 | 2.364118  |
| C  | -1.277854 | 1.065232  | 5.049968  |
| C  | -2.243284 | 2.060447  | 4.969659  |
| H  | -3.267024 | 2.113765  | 5.346774  |
| N  | -0.157660 | 1.490920  | 4.371128  |
| N  | -0.366353 | 2.685591  | 3.909634  |
| N  | -1.659046 | 3.057454  | 4.240402  |
| C  | -2.121148 | 4.350202  | 3.951144  |
| C  | -2.878930 | 6.952143  | 3.538190  |
| C  | -3.494603 | 4.647863  | 3.928388  |
| C  | -1.534024 | 6.560418  | 3.542952  |
| C  | -3.876700 | 5.978190  | 3.719328  |
| N  | -1.155520 | 5.273659  | 3.733821  |
| Ir | 0.972895  | 4.539715  | 3.742631  |
| Zn | 0.908962  | -0.525818 | 0.640432  |
| B  | 2.571594  | 3.495765  | 4.557229  |
| B  | 0.704424  | 4.642118  | 5.838027  |
| B  | 1.934201  | 6.312859  | 3.997254  |
| O  | 1.263851  | 7.551896  | 3.935266  |

|   |           |           |           |
|---|-----------|-----------|-----------|
| O | 3.305093  | 6.515499  | 4.150256  |
| C | 3.512162  | 7.901092  | 4.532436  |
| C | 3.479214  | 7.946185  | 6.069485  |
| C | 4.866878  | 8.367371  | 4.000507  |
| C | 2.262428  | 8.609722  | 3.877813  |
| C | 1.737985  | 9.824930  | 4.642172  |
| C | 2.474133  | 8.947519  | 2.393478  |
| O | 0.765953  | 5.801002  | 6.610982  |
| O | 0.237390  | 3.565867  | 6.602373  |
| C | 0.591627  | 5.433166  | 8.009621  |
| C | -0.196954 | 4.065904  | 7.893257  |
| C | 0.148344  | 3.024173  | 8.957177  |
| C | -1.720200 | 4.256323  | 7.795052  |
| C | -0.166790 | 6.555532  | 8.718595  |
| C | 1.997595  | 5.266051  | 8.601980  |
| H | -1.489292 | 3.502031  | 1.057526  |
| H | -2.826795 | 5.611486  | 0.985839  |
| H | -4.893776 | 5.744610  | -0.454818 |
| H | -5.583513 | 3.756329  | -1.822679 |
| H | -4.218694 | 1.647427  | -1.755589 |
| H | -4.237164 | 3.847151  | 4.044987  |
| H | -4.943416 | 6.246929  | 3.689842  |
| H | -3.132703 | 8.011732  | 3.389986  |
| H | -0.700700 | 7.275964  | 3.448443  |
| H | -1.971448 | 4.992184  | 7.003562  |
| H | -2.166697 | 4.592987  | 8.752392  |
| H | -2.177740 | 3.286199  | 7.514148  |
| H | -0.426200 | 2.094197  | 8.770063  |
| H | -0.101304 | 3.392674  | 9.973777  |
| H | 1.222634  | 2.762804  | 8.925715  |
| H | 1.968308  | 4.997309  | 9.677306  |
| H | 2.548266  | 6.221281  | 8.493411  |
| H | 2.557239  | 4.498609  | 8.036026  |
| H | 0.459924  | 7.469906  | 8.743310  |
| H | -1.108931 | 6.806878  | 8.195472  |
| H | -0.402470 | 6.271517  | 9.765408  |
| H | 2.491535  | 7.605625  | 6.439788  |
| H | 3.699993  | 8.959758  | 6.462296  |
| H | 4.239885  | 7.239473  | 6.456776  |
| H | 5.009921  | 9.452696  | 4.184236  |
| H | 5.679606  | 7.819867  | 4.519145  |
| H | 4.966344  | 8.173071  | 2.915602  |
| H | 2.521387  | 10.607141 | 4.721381  |
| H | 1.408195  | 9.545196  | 5.660196  |
| H | 0.869328  | 10.263212 | 4.108920  |
| H | 3.180451  | 9.791144  | 2.255849  |
| H | 2.854620  | 8.064852  | 1.841205  |
| H | 1.500448  | 9.233321  | 1.945894  |
| H | -1.761128 | 2.349937  | -2.943568 |
| H | 0.434973  | 1.481430  | -4.304278 |
| H | 2.998187  | 2.296454  | -3.546237 |
| H | 4.038937  | 2.810259  | -5.770726 |
| H | 4.447084  | 0.961118  | -7.423067 |
| H | 3.806341  | -1.396176 | -6.835517 |
| H | 2.762409  | -1.895232 | -4.609480 |

|   |           |           |           |
|---|-----------|-----------|-----------|
| H | 4.878330  | -1.202864 | -2.859929 |
| H | 4.377569  | -4.866989 | 2.256183  |
| H | 6.580672  | -5.724872 | 3.098280  |
| H | 8.528639  | -4.157602 | 3.343157  |
| H | 8.259449  | -1.733101 | 2.737329  |
| H | 6.052053  | -0.890654 | 1.895673  |
| H | 3.715850  | -3.054808 | 4.352946  |
| H | 1.320051  | -2.548349 | 5.515832  |
| H | -2.115458 | 0.657788  | 7.558591  |
| H | -2.486195 | -1.531030 | 8.728607  |
| H | -1.980056 | -3.684643 | 7.526155  |
| H | -1.123503 | -3.623080 | 5.169328  |
| H | -3.398906 | -0.576398 | 3.770584  |
| H | -4.026532 | 1.075432  | 1.683893  |
| O | 3.294516  | 3.839147  | 5.708812  |
| O | 2.945265  | 2.225264  | 4.108227  |
| C | 4.273988  | 2.790486  | 5.953455  |
| C | 3.614922  | 1.561448  | 5.225478  |
| C | 5.585880  | 3.247288  | 5.295220  |
| C | 4.461007  | 2.610075  | 7.458964  |
| C | 4.600600  | 0.512678  | 4.713651  |
| C | 2.518757  | 0.881067  | 6.063340  |
| H | 3.495738  | 2.419508  | 7.964270  |
| H | 4.909297  | 3.522541  | 7.901652  |
| H | 5.138604  | 1.755650  | 7.665243  |
| H | 5.846223  | 4.253305  | 5.680010  |
| H | 5.460041  | 3.328212  | 4.196436  |
| H | 6.424302  | 2.554095  | 5.511518  |
| H | 5.372686  | 0.941645  | 4.048660  |
| H | 4.059373  | -0.276187 | 4.154846  |
| H | 5.115882  | 0.028218  | 5.568634  |
| H | 2.949398  | 0.290862  | 6.897976  |
| H | 1.805380  | 1.629135  | 6.464163  |
| H | 1.947451  | 0.201786  | 5.402012  |
| C | 4.764186  | -1.937324 | -0.765132 |
| H | 5.731353  | -2.419404 | -0.581960 |
| O | 1.283794  | 1.401285  | 1.355924  |
| C | 1.968810  | 2.398606  | 1.047885  |
| C | 1.287670  | 3.660961  | 0.601097  |
| N | 3.326809  | 2.394324  | 1.037032  |
| C | 1.022703  | 4.710033  | 1.512759  |
| C | 0.947162  | 3.764094  | -0.762786 |
| C | 4.142672  | 3.574658  | 0.781243  |
| C | 4.055352  | 1.192836  | 1.413804  |
| C | 0.510645  | 5.916141  | 0.973582  |
| H | 2.138578  | 4.526966  | 2.600780  |
| C | 0.353430  | 4.935661  | -1.253243 |
| H | 1.159080  | 2.922048  | -1.437837 |
| H | 3.537308  | 4.382537  | 0.333882  |
| H | 4.585175  | 3.948534  | 1.731949  |
| H | 4.966250  | 3.316810  | 0.082222  |
| H | 4.841498  | 1.459327  | 2.145111  |
| H | 3.362748  | 0.476142  | 1.885636  |
| H | 4.521403  | 0.723206  | 0.520815  |
| C | 0.154663  | 6.021697  | -0.382072 |

|   |           |          |           |
|---|-----------|----------|-----------|
| H | 0.383128  | 6.789096 | 1.631468  |
| H | 0.064547  | 5.001403 | -2.313618 |
| H | -0.280136 | 6.961618 | -0.759841 |

## B

Thermal correction to Gibbs Free Energy= 1.221559

SCF Done: -5998.94100183 A.U.

|   |           |           |           |
|---|-----------|-----------|-----------|
| N | 2.712106  | -0.923336 | -0.297909 |
| C | 3.122109  | -0.499986 | -1.546483 |
| C | 3.791661  | -1.546867 | 0.292136  |
| C | 4.515732  | -0.868430 | -1.753142 |
| C | 3.816632  | -2.115410 | 1.593078  |
| C | 2.709443  | -2.194083 | 2.476506  |
| N | 1.441815  | -1.717948 | 2.217680  |
| C | 0.691210  | -1.929720 | 3.352573  |
| C | 1.513277  | -2.564856 | 4.373955  |
| C | 2.763141  | -2.738480 | 3.826930  |
| C | -0.665805 | -1.552967 | 3.525873  |
| C | -1.461589 | -0.874697 | 2.566582  |
| N | -1.005787 | -0.367341 | 1.374106  |
| C | -1.981147 | 0.473266  | 0.896032  |
| C | -2.835162 | -0.439313 | 2.791633  |
| C | -3.144403 | 0.431333  | 1.773646  |
| C | -1.900483 | 1.273589  | -0.270228 |
| C | -0.893853 | 1.170254  | -1.264124 |
| N | 0.266619  | 0.443525  | -1.135701 |
| C | 0.998689  | 0.648475  | -2.283457 |
| C | -0.925110 | 1.829127  | -2.561924 |
| C | 0.232776  | 1.471775  | -3.213790 |
| C | 2.335489  | 0.217912  | -2.487888 |
| C | 3.965766  | 0.011519  | -5.941813 |
| C | 3.285744  | 1.967555  | -4.046497 |
| C | 3.343357  | -0.361912 | -4.738665 |
| C | 4.248808  | 1.364456  | -6.201684 |
| C | 3.906518  | 2.341804  | -5.249843 |
| C | 2.994073  | 0.610842  | -3.774625 |
| C | -3.532436 | 4.587048  | 0.565385  |
| C | -3.927869 | 2.493433  | -1.273435 |
| C | -4.591768 | 4.656484  | -0.357959 |
| C | -2.679575 | 3.473288  | 0.572719  |
| C | -2.866701 | 2.413821  | -0.347197 |
| C | -4.786039 | 3.608232  | -1.276467 |
| C | -1.243298 | -1.700824 | 4.897769  |
| C | -2.329731 | -1.959940 | 7.509049  |
| C | -1.479414 | -2.970820 | 5.466100  |
| C | -1.561619 | -0.540484 | 5.665375  |
| C | -2.104118 | -0.687759 | 6.961253  |
| C | -2.015803 | -3.105547 | 6.757159  |
| C | 6.188348  | -1.723513 | 2.359367  |
| C | 6.571497  | -4.461941 | 2.839420  |
| C | 5.130730  | -2.625157 | 2.097536  |
| C | 7.419483  | -2.183199 | 2.855216  |
| C | 7.614747  | -3.554804 | 3.098144  |

|    |           |           |           |
|----|-----------|-----------|-----------|
| C  | 5.340376  | -4.000965 | 2.342939  |
| C  | -1.392345 | 0.815972  | 5.105668  |
| C  | -2.322693 | 1.847905  | 5.108029  |
| H  | -3.335394 | 1.916481  | 5.511901  |
| N  | -0.268434 | 1.243118  | 4.429623  |
| N  | -0.448446 | 2.464399  | 4.035489  |
| N  | -1.717031 | 2.864933  | 4.419309  |
| C  | -2.114537 | 4.191087  | 4.229092  |
| C  | -2.730525 | 6.860987  | 4.083421  |
| C  | -3.465650 | 4.570033  | 4.297315  |
| C  | -1.413874 | 6.400021  | 3.976648  |
| C  | -3.777227 | 5.931876  | 4.222726  |
| N  | -1.104567 | 5.077756  | 4.024015  |
| Ir | 0.889101  | 4.293489  | 3.730024  |
| Zn | 0.943338  | -0.397905 | 0.672643  |
| B  | 2.394038  | 3.267347  | 4.796280  |
| B  | 0.805836  | 4.529599  | 5.848118  |
| B  | 1.970282  | 6.008004  | 3.644857  |
| O  | 1.426512  | 7.300010  | 3.684033  |
| O  | 3.360148  | 6.064664  | 3.508903  |
| C  | 3.768471  | 7.427117  | 3.806596  |
| C  | 4.023485  | 7.487368  | 5.322694  |
| C  | 5.037231  | 7.748834  | 3.019115  |
| C  | 2.491300  | 8.244568  | 3.371139  |
| C  | 2.254121  | 9.533229  | 4.156394  |
| C  | 2.429685  | 8.498182  | 1.857032  |
| O  | 1.001654  | 5.756950  | 6.468990  |
| O  | 0.167096  | 3.624906  | 6.702307  |
| C  | 0.702606  | 5.605810  | 7.886407  |
| C  | -0.261920 | 4.350118  | 7.889289  |
| C  | -0.122024 | 3.426787  | 9.098648  |
| C  | -1.735130 | 4.725841  | 7.658945  |
| C  | 0.067311  | 6.902407  | 8.389419  |
| C  | 2.037516  | 5.342075  | 8.594429  |
| H  | -1.826883 | 3.427522  | 1.269185  |
| H  | -3.349917 | 5.409857  | 1.275318  |
| H  | -5.263287 | 5.530177  | -0.368626 |
| H  | -5.615135 | 3.656906  | -2.000739 |
| H  | -4.082799 | 1.668039  | -1.986205 |
| H  | -4.246574 | 3.803947  | 4.392390  |
| H  | -4.825980 | 6.261512  | 4.271285  |
| H  | -2.924486 | 7.942428  | 4.045082  |
| H  | -0.547142 | 7.074190  | 3.870305  |
| H  | -1.838160 | 5.408645  | 6.791634  |
| H  | -2.187135 | 5.212572  | 8.546498  |
| H  | -2.305613 | 3.801589  | 7.435109  |
| H  | -0.821435 | 2.571826  | 8.999149  |
| H  | -0.359807 | 3.964901  | 10.039549 |
| H  | 0.902304  | 3.015583  | 9.172138  |
| H  | 1.917129  | 5.249787  | 9.692687  |
| H  | 2.725734  | 6.184485  | 8.382811  |
| H  | 2.508721  | 4.427062  | 8.191199  |
| H  | 0.812400  | 7.722295  | 8.348359  |
| H  | -0.796595 | 7.201176  | 7.765881  |
| H  | -0.269248 | 6.794420  | 9.441454  |

|   |           |           |           |
|---|-----------|-----------|-----------|
| H | 3.093777  | 7.250441  | 5.879317  |
| H | 4.410243  | 8.476759  | 5.641867  |
| H | 4.769540  | 6.710618  | 5.583428  |
| H | 5.314632  | 8.816959  | 3.137428  |
| H | 5.877896  | 7.131109  | 3.395118  |
| H | 4.910253  | 7.531029  | 1.941536  |
| H | 3.110493  | 10.228830 | 4.035839  |
| H | 2.111807  | 9.325171  | 5.233568  |
| H | 1.343225  | 10.043680 | 3.781709  |
| H | 3.170145  | 9.256835  | 1.531765  |
| H | 2.599298  | 7.556969  | 1.296524  |
| H | 1.415787  | 8.861695  | 1.594813  |
| H | -1.730895 | 2.476462  | -2.925811 |
| H | 0.553313  | 1.760281  | -4.221302 |
| H | 3.022478  | 2.729478  | -3.295571 |
| H | 4.129054  | 3.403544  | -5.442862 |
| H | 4.736073  | 1.657046  | -7.145435 |
| H | 4.226905  | -0.759745 | -6.684122 |
| H | 3.116062  | -1.419863 | -4.533554 |
| H | 5.101618  | -0.656117 | -2.654675 |
| H | 4.522281  | -4.708654 | 2.136100  |
| H | 6.718801  | -5.538733 | 3.020840  |
| H | 8.579675  | -3.916691 | 3.487522  |
| H | 8.229875  | -1.464736 | 3.057988  |
| H | 6.029370  | -0.650269 | 2.172691  |
| H | 3.648468  | -3.174027 | 4.303546  |
| H | 1.186879  | -2.830807 | 5.385477  |
| H | -2.324858 | 0.216733  | 7.550755  |
| H | -2.744418 | -2.056540 | 8.524741  |
| H | -2.193399 | -4.109094 | 7.175177  |
| H | -1.242917 | -3.863393 | 4.866342  |
| H | -3.469203 | -0.750113 | 3.630559  |
| H | -4.082354 | 0.972899  | 1.602129  |
| O | 3.268545  | 3.741023  | 5.784230  |
| O | 2.618846  | 1.919494  | 4.533458  |
| C | 4.215118  | 2.670090  | 6.083163  |
| C | 3.421293  | 1.385717  | 5.617907  |
| C | 5.463410  | 2.955256  | 5.234888  |
| C | 4.558689  | 2.696475  | 7.570854  |
| C | 4.291046  | 0.248083  | 5.087786  |
| C | 2.428280  | 0.857257  | 6.668136  |
| H | 3.653586  | 2.602751  | 8.199534  |
| H | 5.061736  | 3.649828  | 7.830183  |
| H | 5.244165  | 1.860616  | 7.821242  |
| H | 5.834637  | 3.971503  | 5.474922  |
| H | 5.209284  | 2.939407  | 4.156166  |
| H | 6.274642  | 2.224113  | 5.425516  |
| H | 4.942356  | 0.569224  | 4.255489  |
| H | 3.643038  | -0.565891 | 4.709411  |
| H | 4.931831  | -0.162814 | 5.895101  |
| H | 2.941815  | 0.362319  | 7.517399  |
| H | 1.783192  | 1.676604  | 7.046310  |
| H | 1.766562  | 0.121412  | 6.168520  |
| C | 4.928404  | -1.524072 | -0.615464 |
| H | 5.912167  | -1.962239 | -0.411688 |

|   |           |          |           |
|---|-----------|----------|-----------|
| O | 1.311725  | 1.480255 | 1.476831  |
| C | 1.918829  | 2.521115 | 1.142837  |
| C | 1.142533  | 3.718635 | 0.671261  |
| N | 3.275905  | 2.615971 | 1.186617  |
| C | 0.600619  | 4.629873 | 1.615898  |
| C | 0.938070  | 3.860322 | -0.715728 |
| C | 4.004244  | 3.855061 | 0.933352  |
| C | 4.068165  | 1.476354 | 1.629880  |
| C | -0.101547 | 5.731545 | 1.071974  |
| H | 2.321159  | 3.759949 | 3.239011  |
| C | 0.188197  | 4.936796 | -1.212764 |
| H | 1.361979  | 3.113577 | -1.404466 |
| H | 3.327746  | 4.611127 | 0.498120  |
| H | 4.405512  | 4.271874 | 1.883404  |
| H | 4.842007  | 3.663953 | 0.229591  |
| H | 4.790033  | 1.808878 | 2.402993  |
| H | 3.399249  | 0.716073 | 2.069493  |
| H | 4.625666  | 1.030921 | 0.777530  |
| C | -0.320658 | 5.883942 | -0.309456 |
| H | -0.499732 | 6.510601 | 1.741296  |
| H | 0.006860  | 5.028669 | -2.294933 |
| H | -0.899887 | 6.746055 | -0.679178 |

## TS<sub>BC</sub>

Thermal correction to Gibbs Free Energy= 1.227072

SCF Done: -5998.91225946 A.U.

|   |           |           |           |
|---|-----------|-----------|-----------|
| N | 2.709514  | -0.899764 | -0.269008 |
| C | 3.070959  | -0.525391 | -1.548194 |
| C | 3.822132  | -1.467315 | 0.315267  |
| C | 4.472499  | -0.849125 | -1.773569 |
| C | 3.886852  | -2.015438 | 1.623534  |
| C | 2.790802  | -2.133668 | 2.516351  |
| N | 1.514020  | -1.668040 | 2.283229  |
| C | 0.769191  | -1.952388 | 3.407691  |
| C | 1.607545  | -2.614315 | 4.397381  |
| C | 2.859846  | -2.734600 | 3.841965  |
| C | -0.599249 | -1.628597 | 3.595614  |
| C | -1.412723 | -0.953100 | 2.650026  |
| N | -0.969017 | -0.405072 | 1.470029  |
| C | -1.980646 | 0.390256  | 0.990901  |
| C | -2.799334 | -0.567395 | 2.878794  |
| C | -3.136830 | 0.308538  | 1.874035  |
| C | -1.966575 | 1.130177  | -0.217159 |
| C | -1.010521 | 0.966315  | -1.253783 |
| N | 0.189099  | 0.311054  | -1.108173 |
| C | 0.865479  | 0.439914  | -2.300942 |
| C | -1.132729 | 1.481276  | -2.609570 |
| C | 0.017735  | 1.120161  | -3.274129 |
| C | 2.222126  | 0.081399  | -2.512902 |
| C | 3.783775  | -0.254678 | -5.988988 |
| C | 3.009713  | 1.776927  | -4.213268 |
| C | 3.217449  | -0.585707 | -4.746381 |
| C | 3.964346  | 1.093215  | -6.347787 |

|    |           |           |           |
|----|-----------|-----------|-----------|
| C  | 3.575154  | 2.108630  | -5.455701 |
| C  | 2.822338  | 0.425375  | -3.841235 |
| C  | -3.653516 | 4.419929  | 0.582007  |
| C  | -4.026182 | 2.295352  | -1.224998 |
| C  | -4.718925 | 4.459631  | -0.335626 |
| C  | -2.779914 | 3.322482  | 0.597318  |
| C  | -2.955070 | 2.246789  | -0.307179 |
| C  | -4.901932 | 3.395708  | -1.238317 |
| C  | -1.176293 | -1.843142 | 4.961694  |
| C  | -2.260707 | -2.245052 | 7.556675  |
| C  | -1.366711 | -3.141942 | 5.479633  |
| C  | -1.544140 | -0.724888 | 5.773770  |
| C  | -2.083818 | -0.944631 | 7.059836  |
| C  | -1.901167 | -3.347675 | 6.762256  |
| C  | 6.262114  | -1.550704 | 2.328966  |
| C  | 6.738676  | -4.271884 | 2.820699  |
| C  | 5.224269  | -2.484809 | 2.104393  |
| C  | 7.519007  | -1.969285 | 2.795488  |
| C  | 7.760827  | -3.332173 | 3.045165  |
| C  | 5.481919  | -3.851979 | 2.352991  |
| C  | -1.433799 | 0.646492  | 5.241318  |
| C  | -2.375688 | 1.669791  | 5.283038  |
| H  | -3.345731 | 1.751459  | 5.779017  |
| N  | -0.381157 | 1.052944  | 4.449245  |
| N  | -0.619873 | 2.241442  | 3.992101  |
| N  | -1.853681 | 2.654970  | 4.481922  |
| C  | -2.299582 | 3.938708  | 4.180586  |
| C  | -2.976108 | 6.571078  | 3.759799  |
| C  | -3.639329 | 4.326260  | 4.362412  |
| C  | -1.674621 | 6.106582  | 3.559085  |
| C  | -3.983077 | 5.663582  | 4.147222  |
| N  | -1.336491 | 4.796937  | 3.732295  |
| Ir | 0.656812  | 4.081197  | 3.436460  |
| Zn | 0.966458  | -0.354216 | 0.740249  |
| B  | 2.238196  | 3.107387  | 4.432416  |
| B  | 0.701795  | 4.809491  | 5.352958  |
| B  | 1.547022  | 5.709118  | 2.457392  |
| O  | 1.086480  | 7.038070  | 2.726995  |
| O  | 2.948373  | 5.766678  | 2.157893  |
| C  | 3.443603  | 7.028713  | 2.644892  |
| C  | 3.871284  | 6.829315  | 4.110224  |
| C  | 4.641372  | 7.448125  | 1.788869  |
| C  | 2.171084  | 7.962414  | 2.500322  |
| C  | 2.083368  | 9.074228  | 3.547647  |
| C  | 2.008660  | 8.524089  | 1.077606  |
| O  | 0.952611  | 6.126305  | 5.714845  |
| O  | 0.152076  | 4.084672  | 6.418925  |
| C  | 0.808298  | 6.237460  | 7.159079  |
| C  | -0.145322 | 5.016866  | 7.493898  |
| C  | 0.136403  | 4.328394  | 8.829138  |
| C  | -1.637107 | 5.367340  | 7.367526  |
| C  | 0.224855  | 7.613610  | 7.480557  |
| C  | 2.213724  | 6.087126  | 7.757521  |
| H  | -1.920684 | 3.300792  | 1.287781  |
| H  | -3.485127 | 5.253891  | 1.281124  |

|   |           |           |           |
|---|-----------|-----------|-----------|
| H | -5.406093 | 5.320868  | -0.351243 |
| H | -5.738609 | 3.418689  | -1.955046 |
| H | -4.179786 | 1.453421  | -1.918301 |
| H | -4.388437 | 3.580408  | 4.660571  |
| H | -5.023293 | 5.995375  | 4.283357  |
| H | -3.191419 | 7.639045  | 3.613128  |
| H | -0.832701 | 6.769869  | 3.293566  |
| H | -1.842128 | 5.882888  | 6.407839  |
| H | -1.988853 | 6.013307  | 8.197179  |
| H | -2.224454 | 4.426827  | 7.379975  |
| H | -0.571702 | 3.487487  | 8.974905  |
| H | 0.014915  | 5.036243  | 9.675174  |
| H | 1.162358  | 3.915184  | 8.854984  |
| H | 2.211124  | 6.192605  | 8.861149  |
| H | 2.868343  | 6.872664  | 7.329846  |
| H | 2.643159  | 5.108275  | 7.474881  |
| H | 0.956053  | 8.400895  | 7.206976  |
| H | -0.703758 | 7.804337  | 6.909895  |
| H | 0.006280  | 7.706401  | 8.564680  |
| H | 3.004993  | 6.540233  | 4.735002  |
| H | 4.346155  | 7.739232  | 4.532161  |
| H | 4.601797  | 5.997135  | 4.151357  |
| H | 4.978993  | 8.471916  | 2.053182  |
| H | 5.488482  | 6.753739  | 1.966003  |
| H | 4.399035  | 7.420370  | 0.709225  |
| H | 2.976460  | 9.732178  | 3.508202  |
| H | 1.991969  | 8.639255  | 4.560859  |
| H | 1.186260  | 9.700315  | 3.361035  |
| H | 2.765466  | 9.300047  | 0.841237  |
| H | 2.079344  | 7.709372  | 0.328919  |
| H | 1.001839  | 8.980324  | 0.986117  |
| H | -1.988364 | 2.040440  | -3.003983 |
| H | 0.280604  | 1.317025  | -4.319794 |
| H | 2.709000  | 2.569808  | -3.509909 |
| H | 3.717027  | 3.167159  | -5.726630 |
| H | 4.407959  | 1.352269  | -7.322329 |
| H | 4.081407  | -1.055770 | -6.684452 |
| H | 3.069916  | -1.639946 | -4.464006 |
| H | 5.027178  | -0.660632 | -2.699785 |
| H | 4.681836  | -4.586150 | 2.169456  |
| H | 6.923023  | -5.342405 | 3.005219  |
| H | 8.745896  | -3.662075 | 3.411759  |
| H | 8.313181  | -1.225637 | 2.969408  |
| H | 6.067426  | -0.484628 | 2.134650  |
| H | 3.753500  | -3.176205 | 4.296807  |
| H | 1.287823  | -2.937462 | 5.394194  |
| H | -2.345204 | -0.074098 | 7.682795  |
| H | -2.674832 | -2.397225 | 8.565791  |
| H | -2.041569 | -4.372895 | 7.139781  |
| H | -1.095706 | -4.001382 | 4.846909  |
| H | -3.424400 | -0.913823 | 3.710232  |
| H | -4.094965 | 0.814511  | 1.705546  |
| O | 3.036244  | 3.689911  | 5.426463  |
| O | 2.549993  | 1.767525  | 4.250084  |
| C | 4.004292  | 2.691904  | 5.865165  |

|   |           |           |           |
|---|-----------|-----------|-----------|
| C | 3.325046  | 1.339288  | 5.403869  |
| C | 5.310228  | 3.002921  | 5.119267  |
| C | 4.204352  | 2.811549  | 7.375438  |
| C | 4.306777  | 0.257403  | 4.963776  |
| C | 2.314476  | 0.783268  | 6.420484  |
| H | 3.237958  | 2.767550  | 7.911903  |
| H | 4.694913  | 3.774434  | 7.623035  |
| H | 4.851306  | 1.989617  | 7.745866  |
| H | 5.612386  | 4.044920  | 5.345696  |
| H | 5.157720  | 2.925795  | 4.024104  |
| H | 6.133227  | 2.322568  | 5.416908  |
| H | 4.934545  | 0.590535  | 4.117304  |
| H | 3.747448  | -0.637194 | 4.632518  |
| H | 4.970985  | -0.037287 | 5.802288  |
| H | 2.815171  | 0.359596  | 7.314629  |
| H | 1.601972  | 1.573729  | 6.735305  |
| H | 1.729051  | -0.014451 | 5.921522  |
| C | 4.935743  | -1.441881 | -0.620532 |
| H | 5.937845  | -1.840825 | -0.426083 |
| O | 1.332258  | 1.668889  | 1.287465  |
| C | 1.951880  | 2.663010  | 0.840527  |
| C | 1.130507  | 3.814869  | 0.302256  |
| N | 3.304634  | 2.729832  | 0.793995  |
| C | 0.661141  | 4.889513  | 1.114840  |
| C | 0.710283  | 3.679363  | -1.035476 |
| C | 4.035493  | 3.822836  | 0.165445  |
| C | 4.106785  | 1.640962  | 1.339831  |
| C | -0.298921 | 5.751991  | 0.528002  |
| H | 2.200915  | 3.707904  | 3.073741  |
| C | -0.211717 | 4.576265  | -1.592387 |
| H | 1.098771  | 2.845245  | -1.637034 |
| H | 4.747206  | 4.266156  | 0.890591  |
| H | 4.591523  | 3.444055  | -0.720653 |
| H | 3.338353  | 4.622701  | -0.136993 |
| H | 4.866216  | 2.061562  | 2.032021  |
| H | 3.453525  | 0.950007  | 1.901123  |
| H | 4.625646  | 1.090216  | 0.526571  |
| C | -0.733351 | 5.609681  | -0.797698 |
| H | -0.676750 | 6.597542  | 1.121425  |
| H | -0.535701 | 4.444320  | -2.635982 |
| H | -1.480857 | 6.305873  | -1.209852 |

## C

Thermal correction to Gibbs Free Energy= 1.224849  
 SCF Done: -5998.94999858 A.U.

|   |          |           |           |
|---|----------|-----------|-----------|
| N | 2.582592 | -0.449538 | -1.408239 |
| C | 2.711194 | 0.599309  | -2.295507 |
| C | 3.758968 | -1.164938 | -1.447351 |
| C | 4.035346 | 0.565124  | -2.901705 |
| C | 4.135121 | -2.207306 | -0.554568 |
| C | 3.406019 | -2.570133 | 0.608059  |
| N | 2.157224 | -2.091527 | 0.933858  |
| C | 1.887177 | -2.492310 | 2.222389  |









































## 8. NMR data.

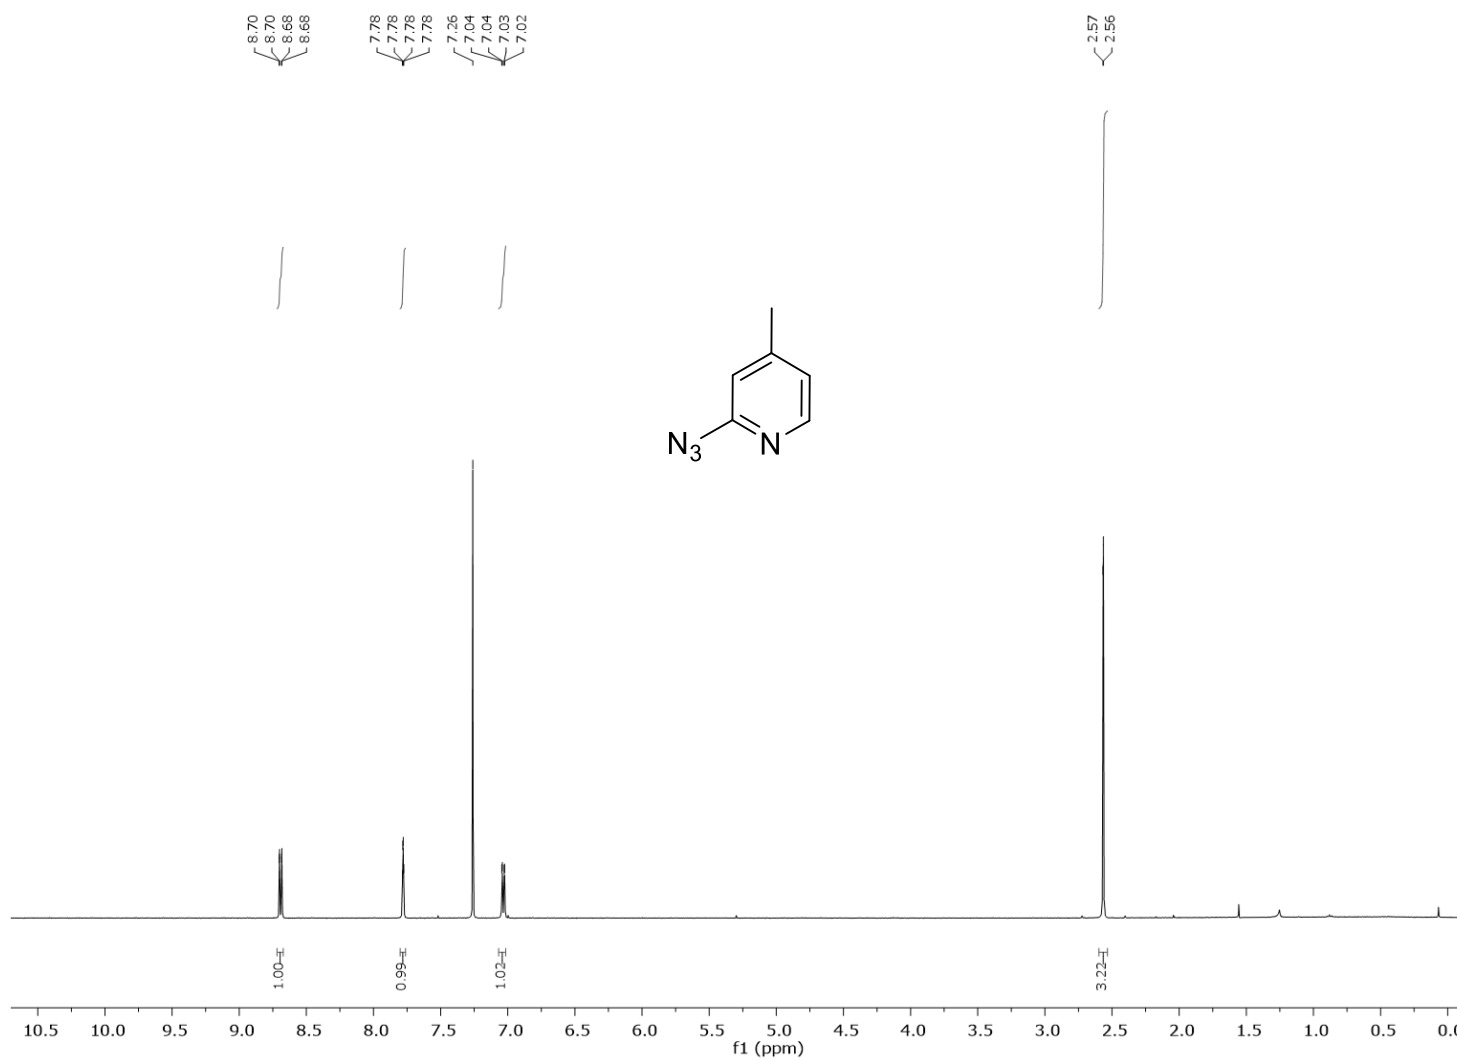

<sup>1</sup>H NMR (CDCl<sub>3</sub>, 400 MHz) spectrum of 2-azido-4-methylpyridine (AP3).

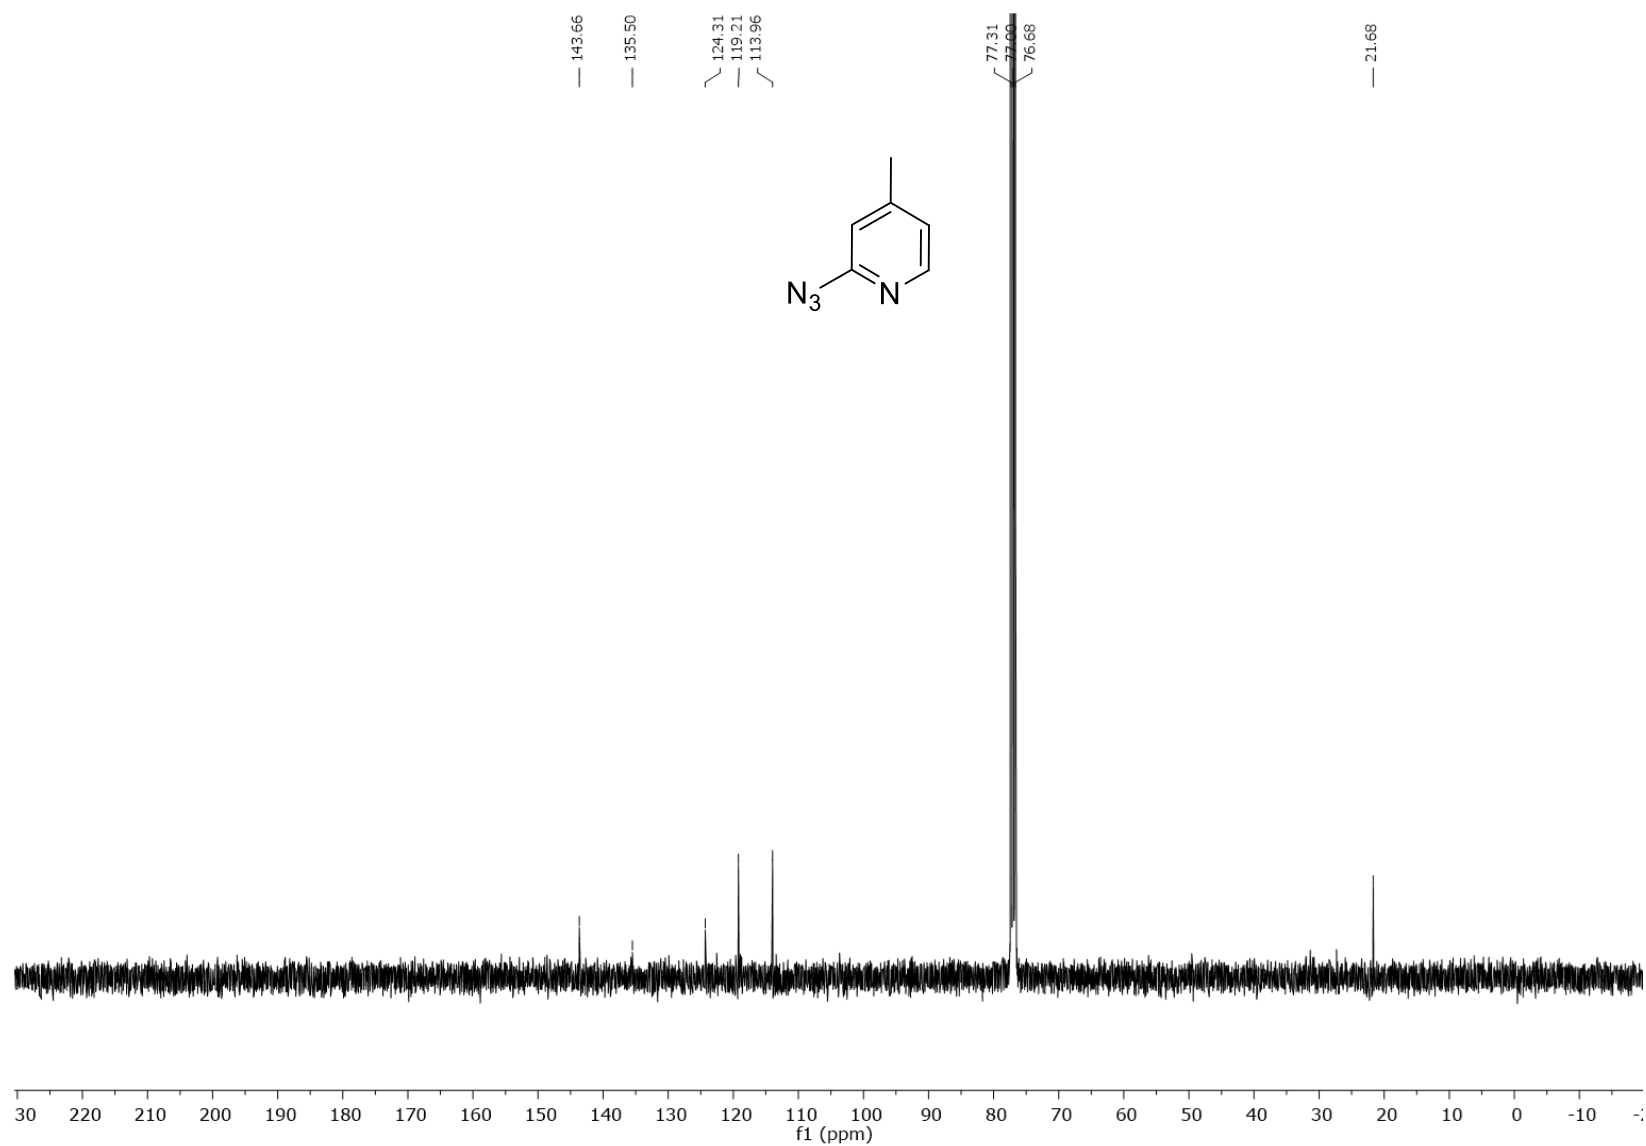

$^{13}\text{C}\{^1\text{H}\}$  NMR (CDCl<sub>3</sub>, 101 MHz) spectrum of 2-azido-4-methylpyridine (**AP3**).

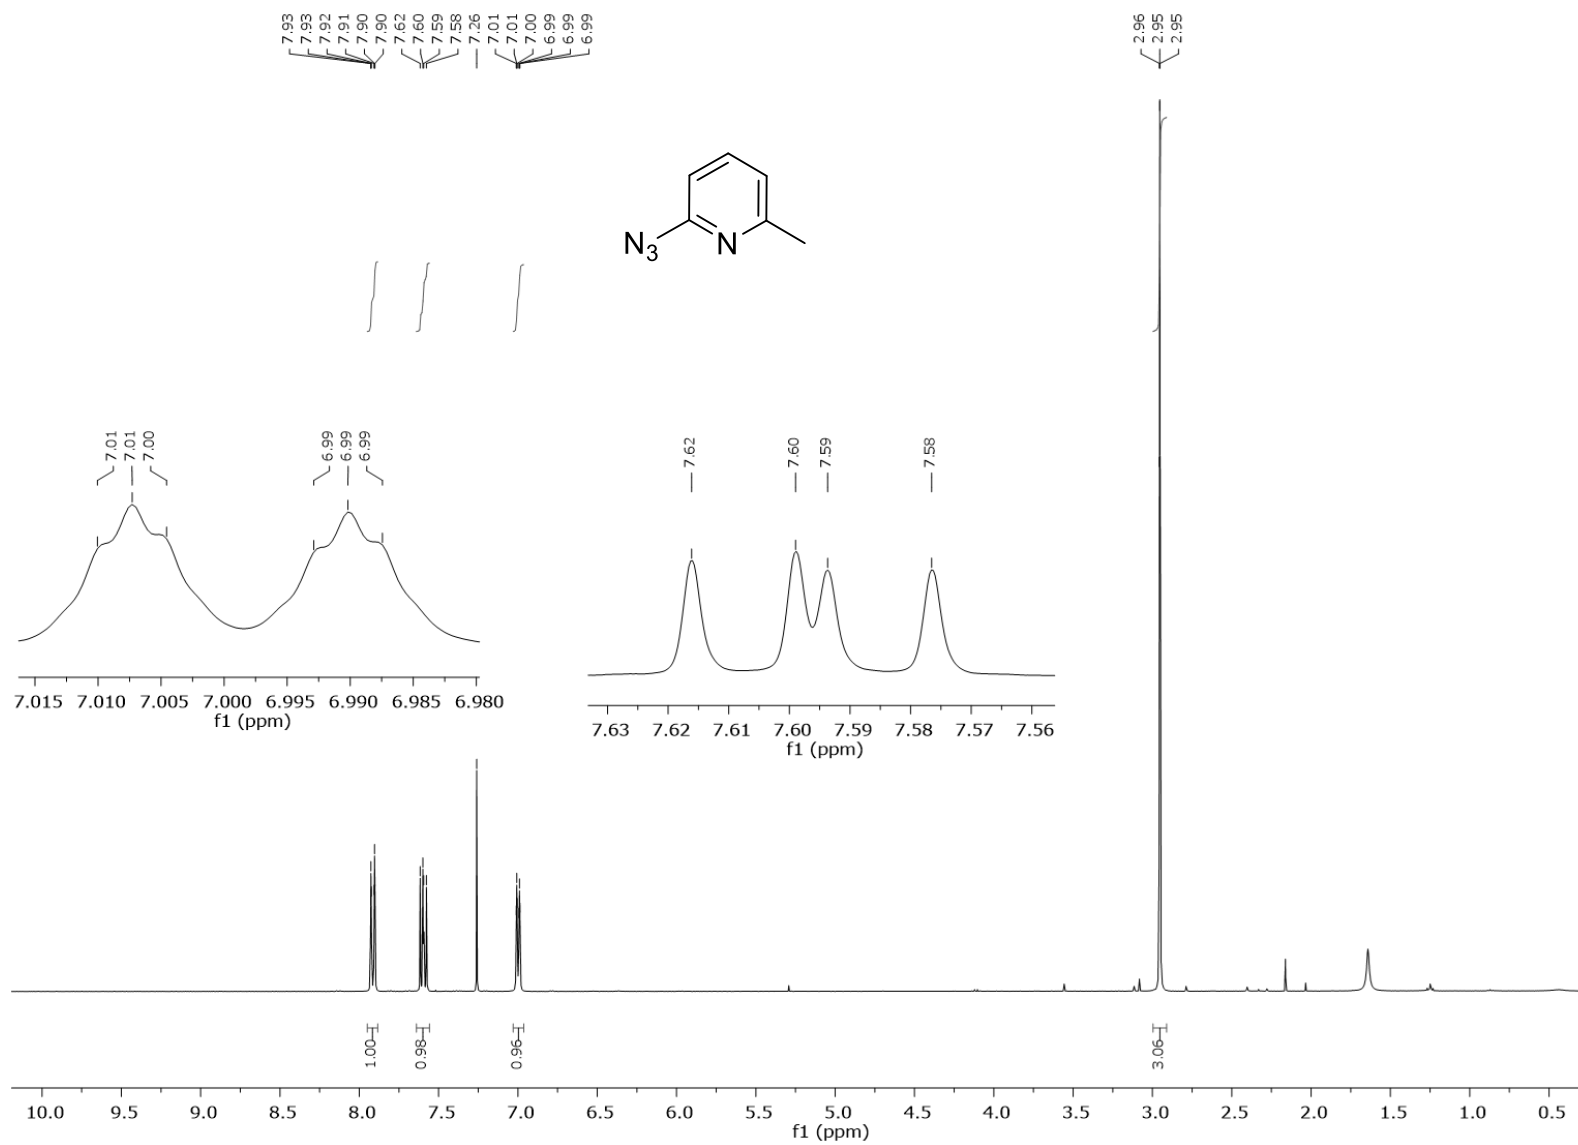

$^1\text{H}$  NMR ( $\text{CDCl}_3$ , 400 MHz) spectrum of 2-azido-6-methylpyridine (**AP4**).

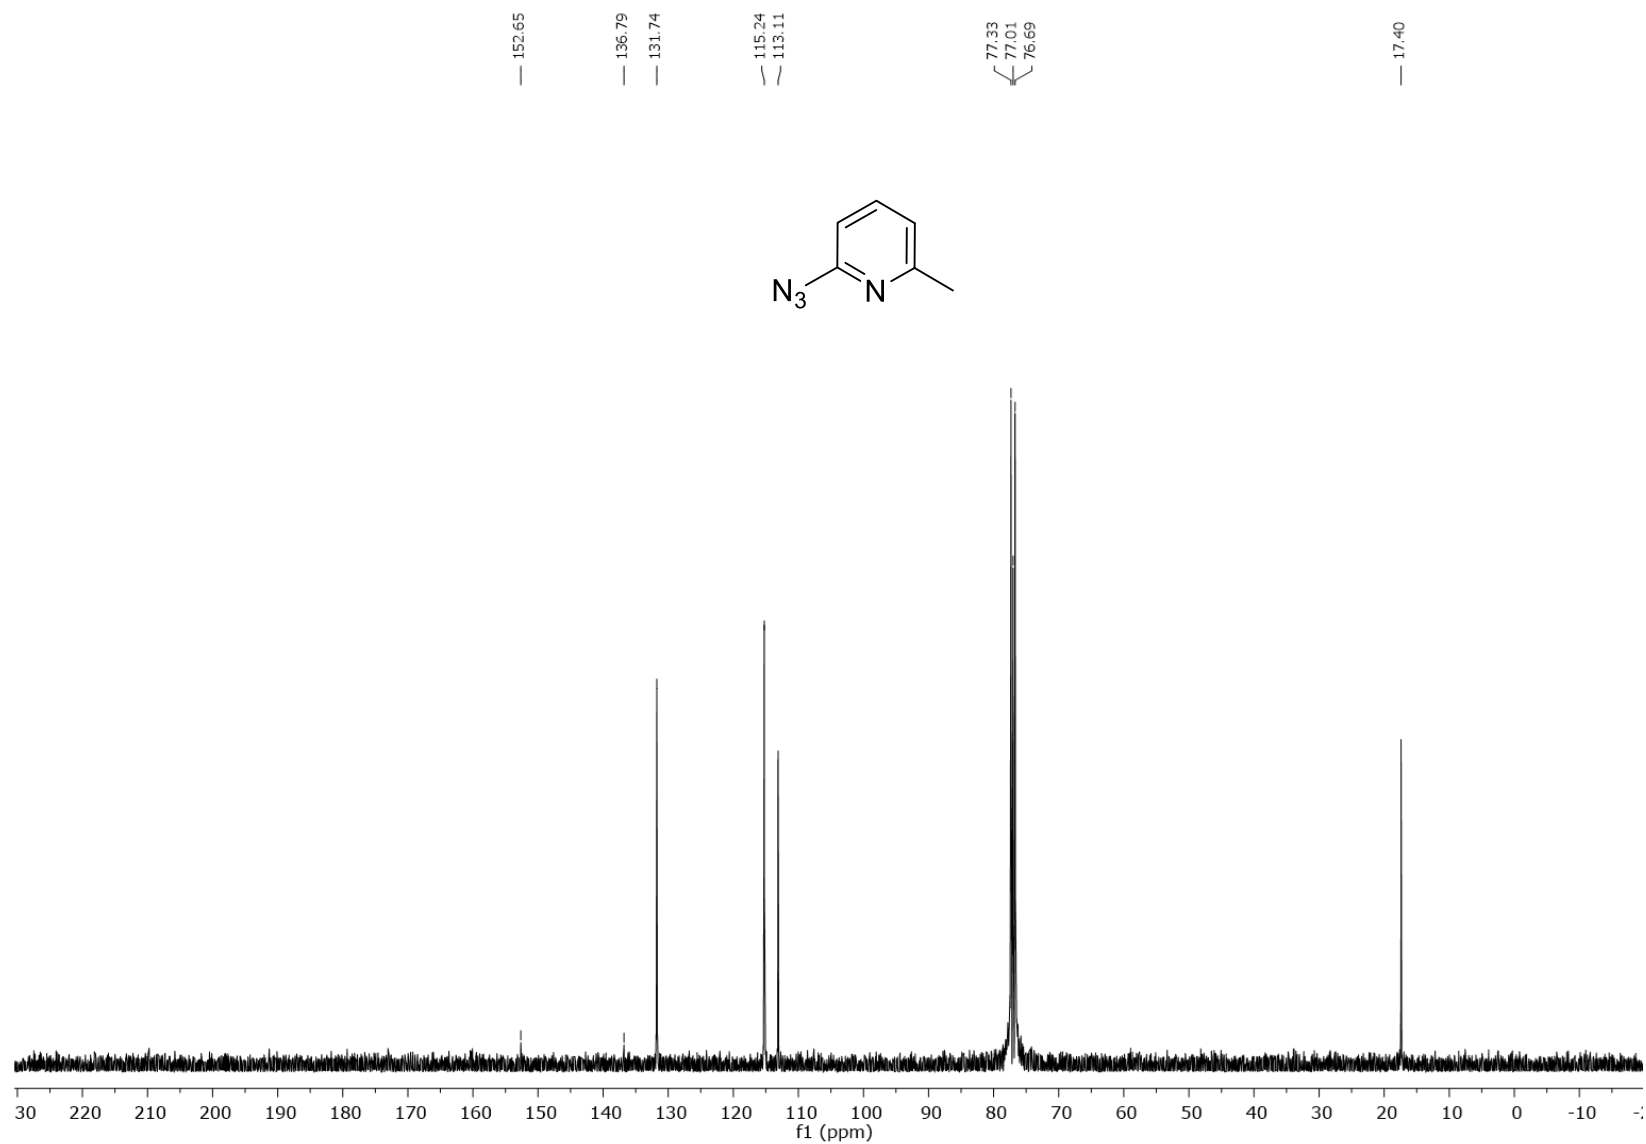

$^{13}\text{C}\{^1\text{H}\}$  NMR (CDCl<sub>3</sub>, 101 MHz) spectrum of 2-azido-6-methylpyridine (**AP4**).

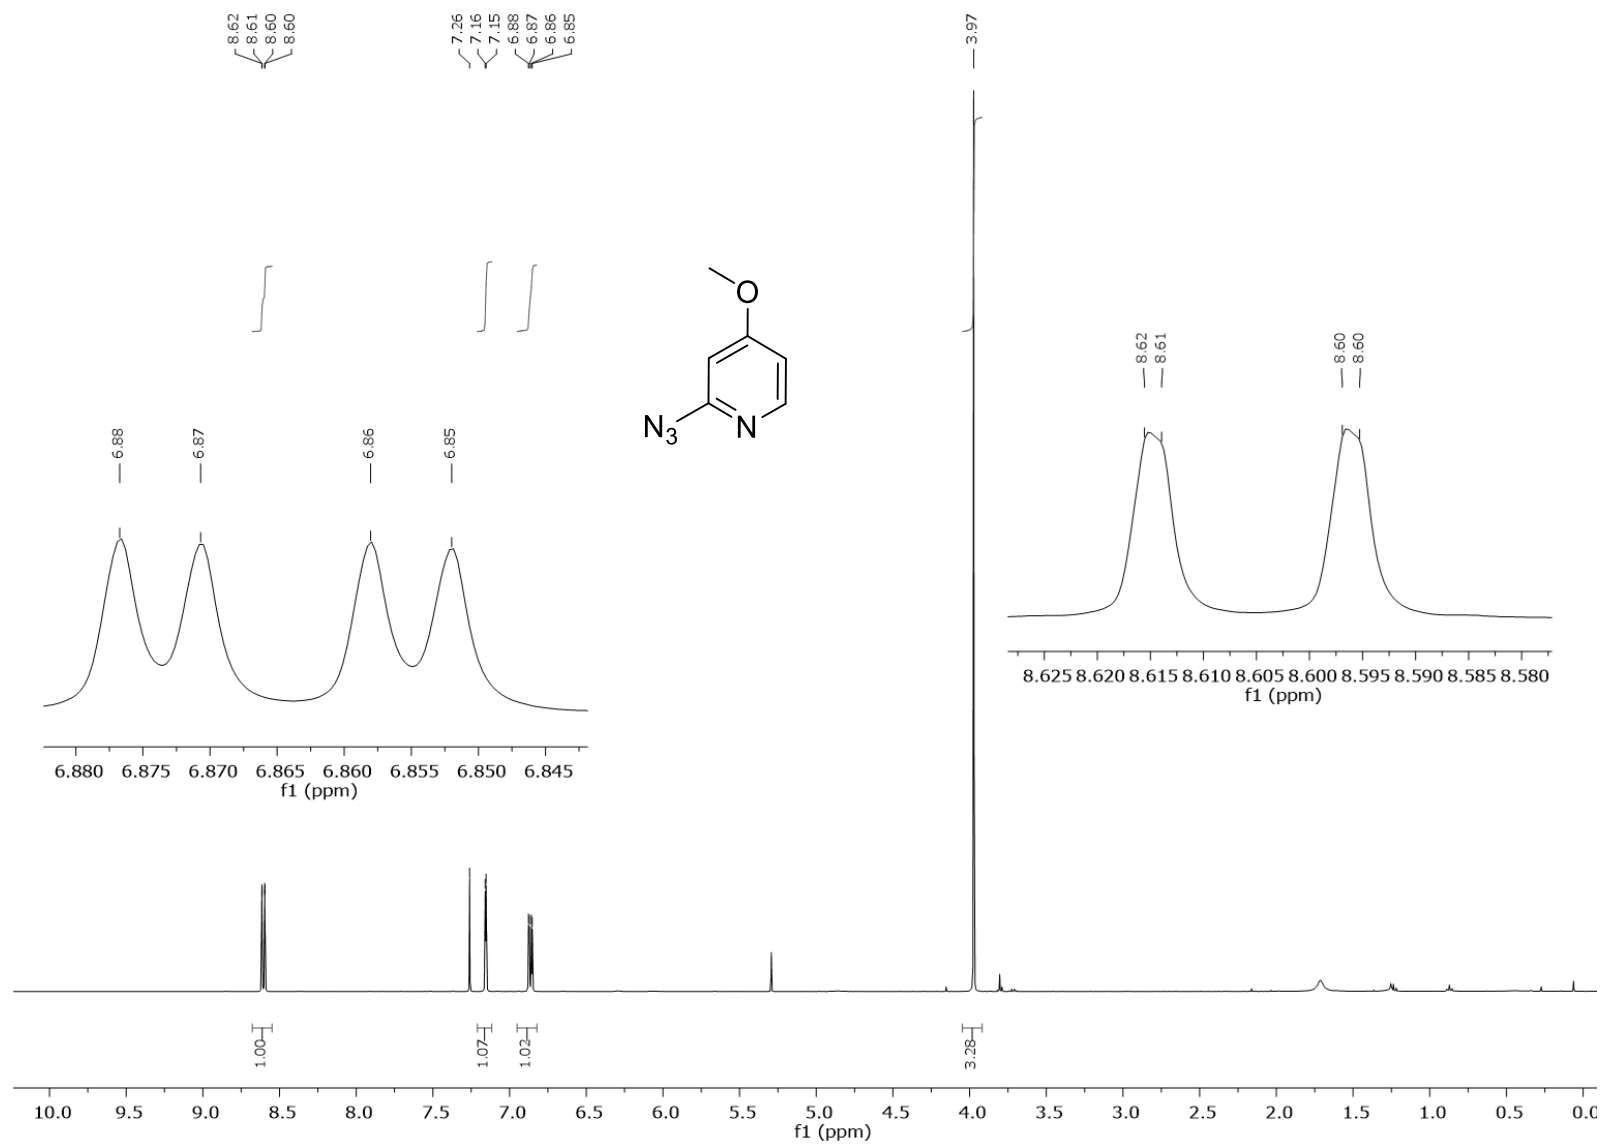

$^1\text{H}$  NMR ( $\text{CDCl}_3$ , 400 MHz) spectrum of 2-azido-4-methoxypyridine (AP5).

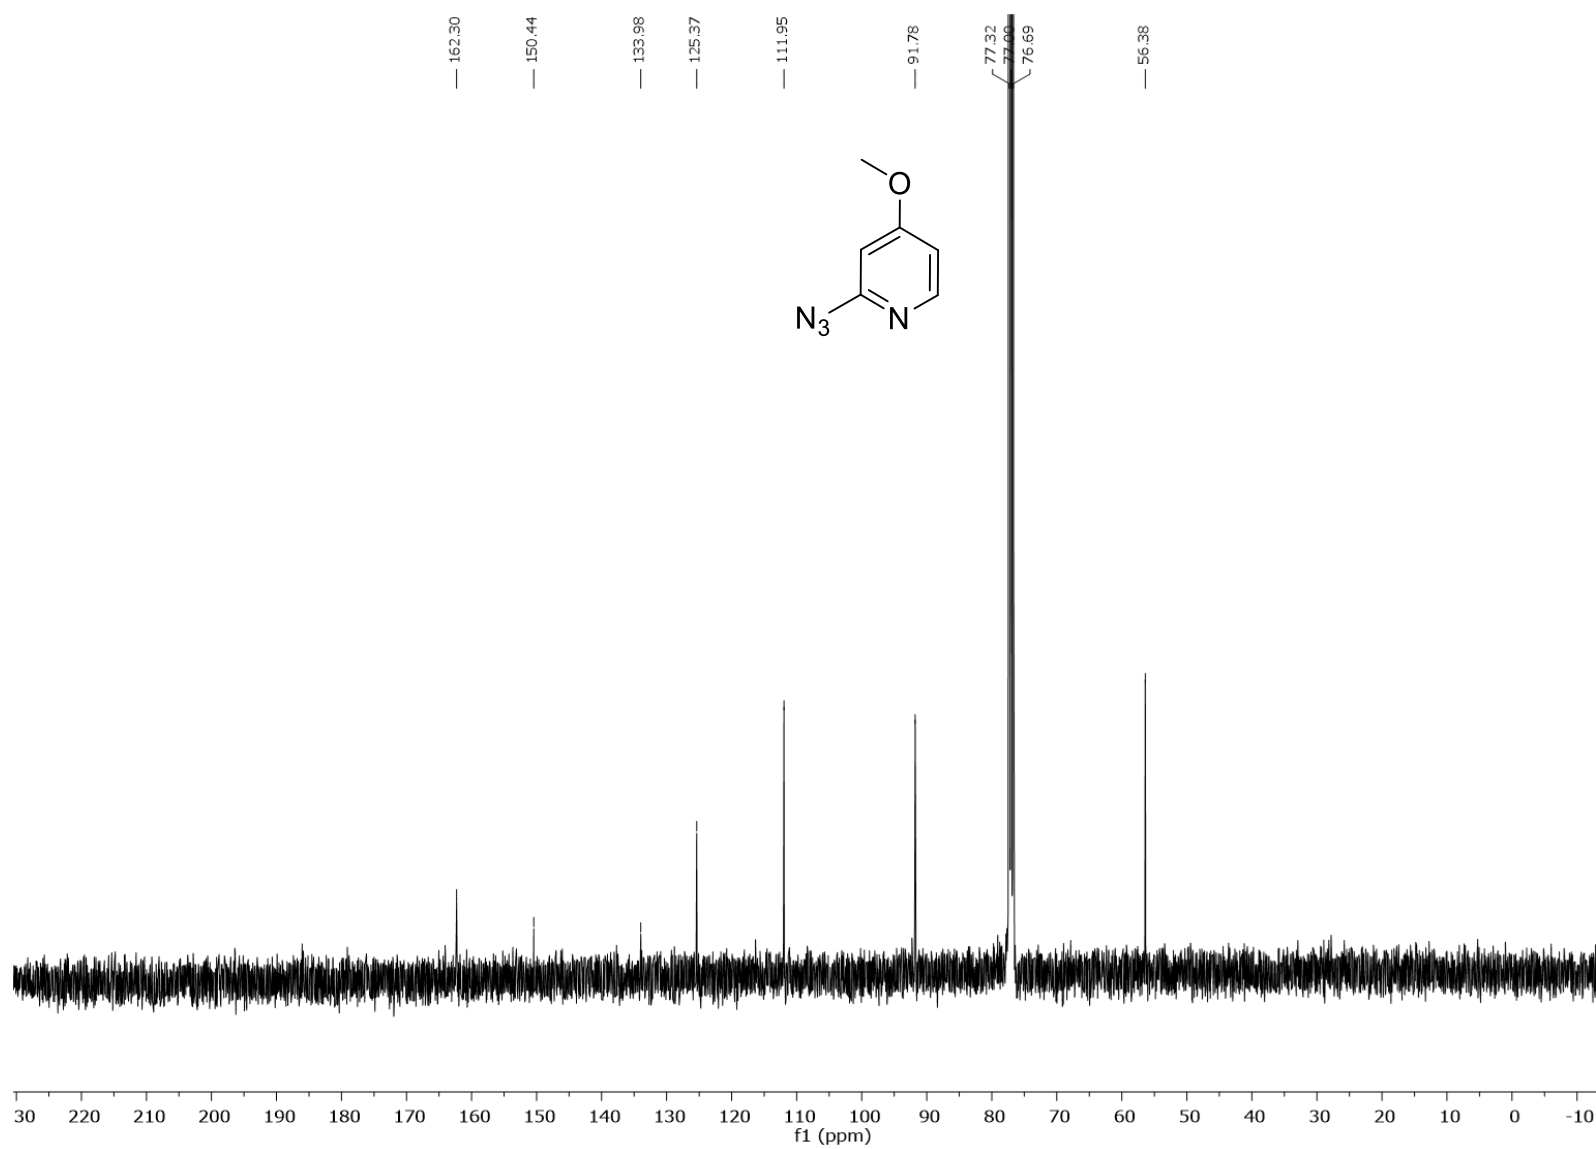

$^{13}\text{C}\{^1\text{H}\}$  NMR (CDCl<sub>3</sub>, 101 MHz) spectrum of 2-azido-4-methoxypyridine (AP5).

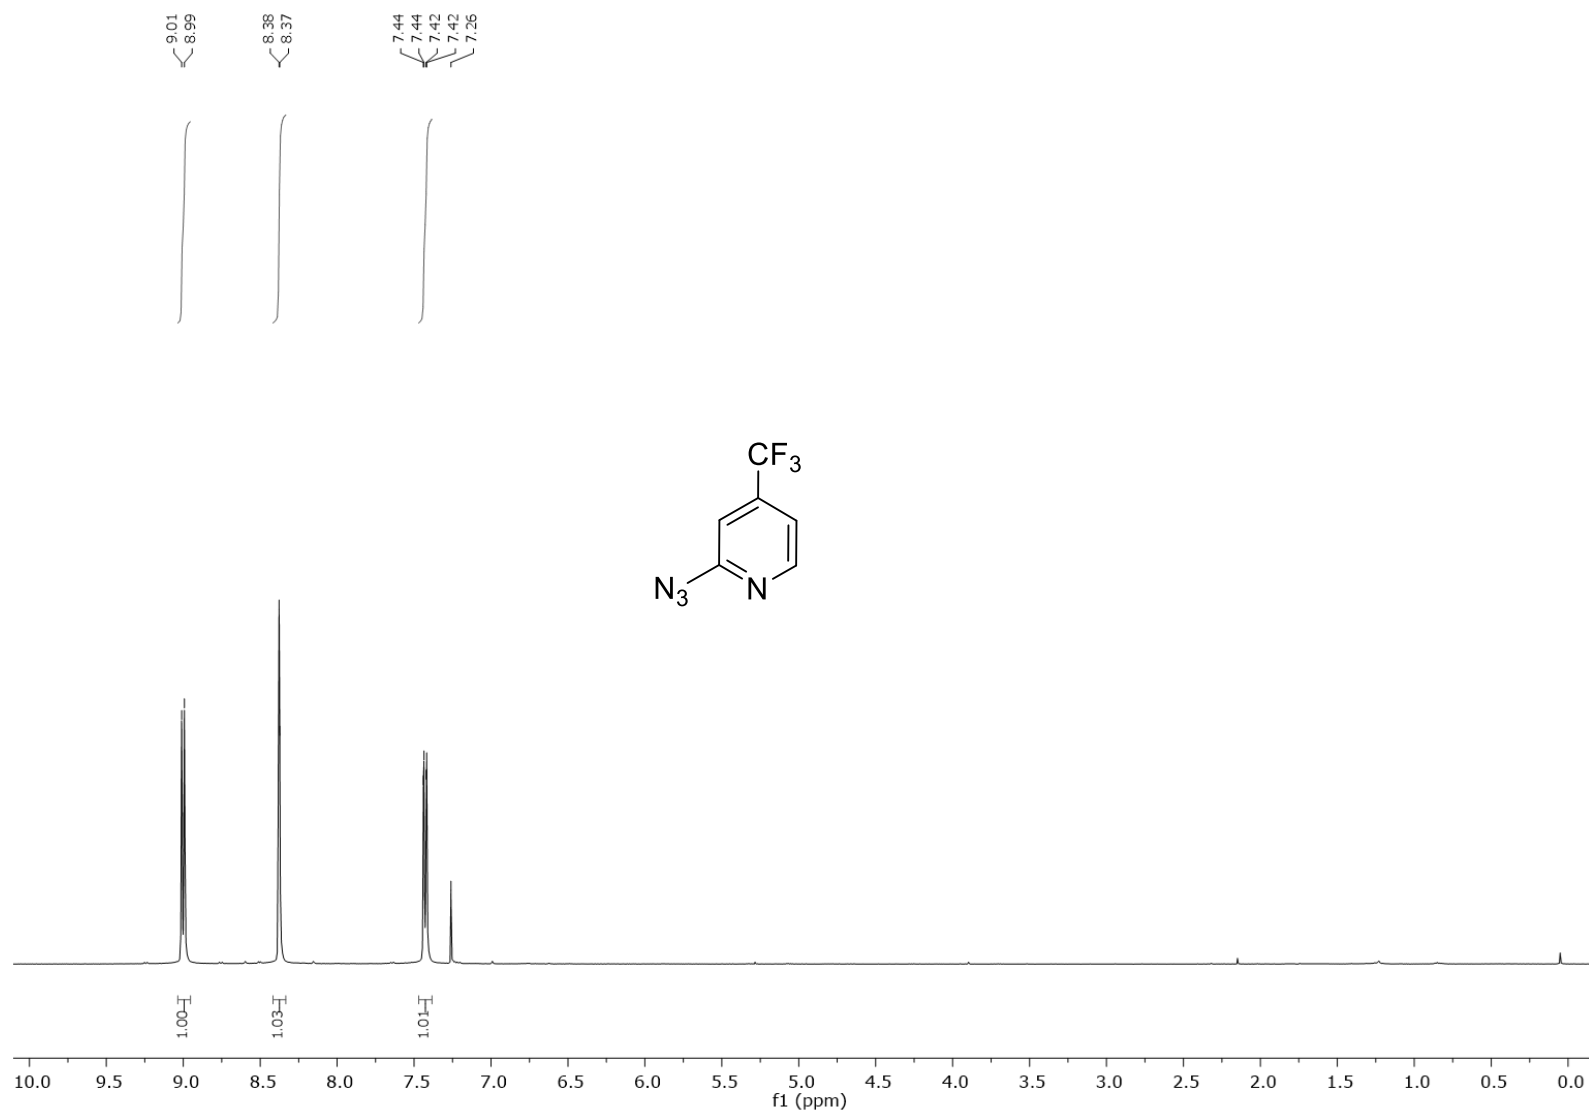

<sup>1</sup>H NMR (CDCl<sub>3</sub>, 400 MHz) spectrum of 2-azido-4-trifluoromethylpyridine (**AP6**).

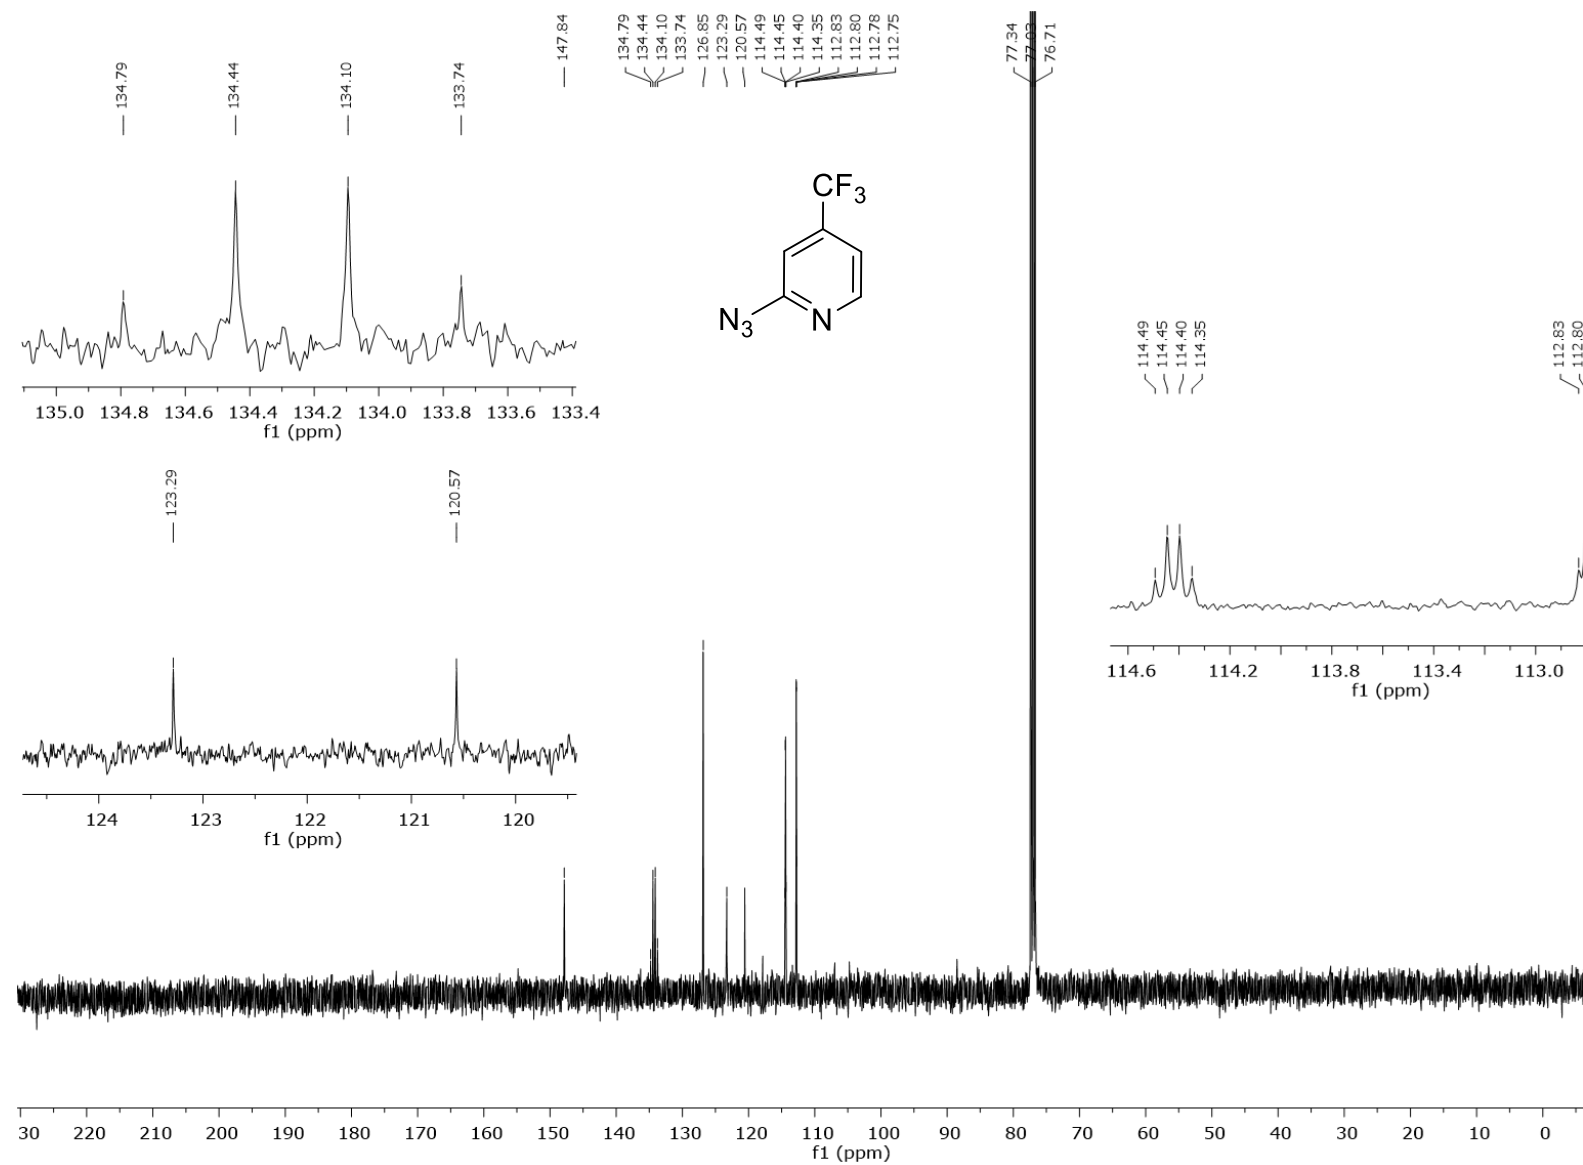

$^{13}\text{C}\{^1\text{H}\}$  NMR (CDCl<sub>3</sub>, 101 MHz) spectrum of 2-azido-4-(trifluoromethyl)pyridine (AP6).

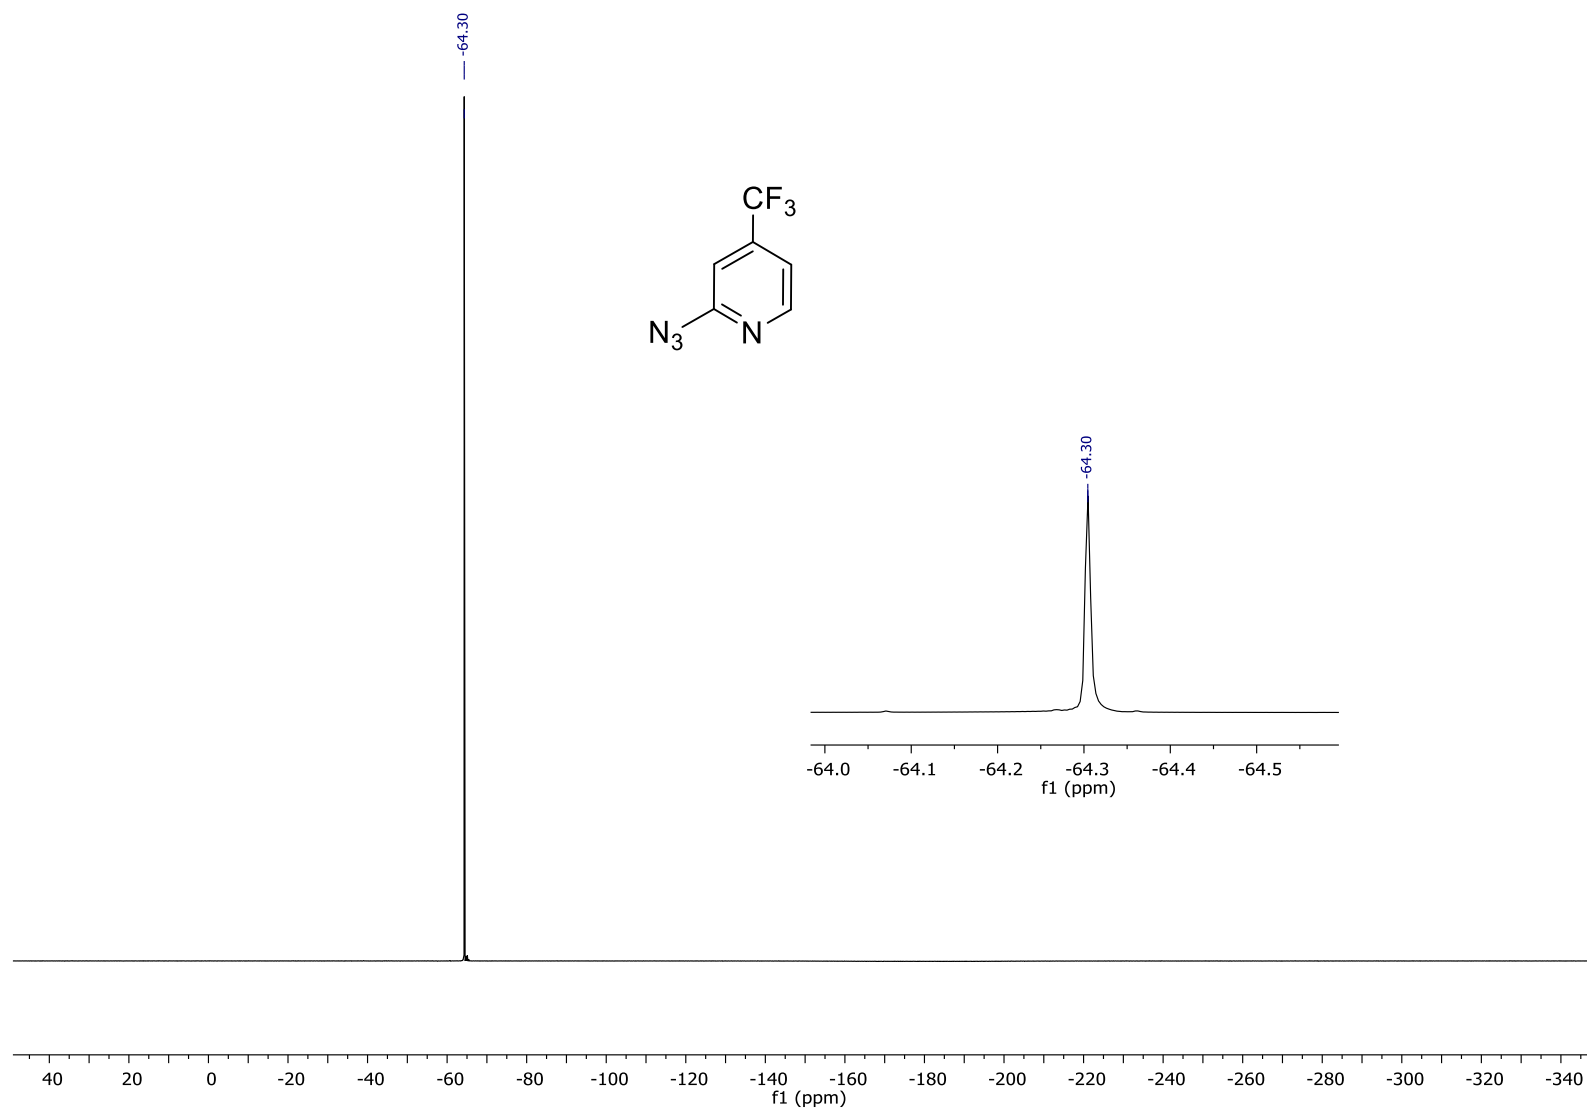

$^{19}\text{F}\{^1\text{H}\}$  NMR ( $\text{CDCl}_3$ , 376 MHz) spectrum of 2-azido-4-trifluoromethylpyridine (**AP6**).

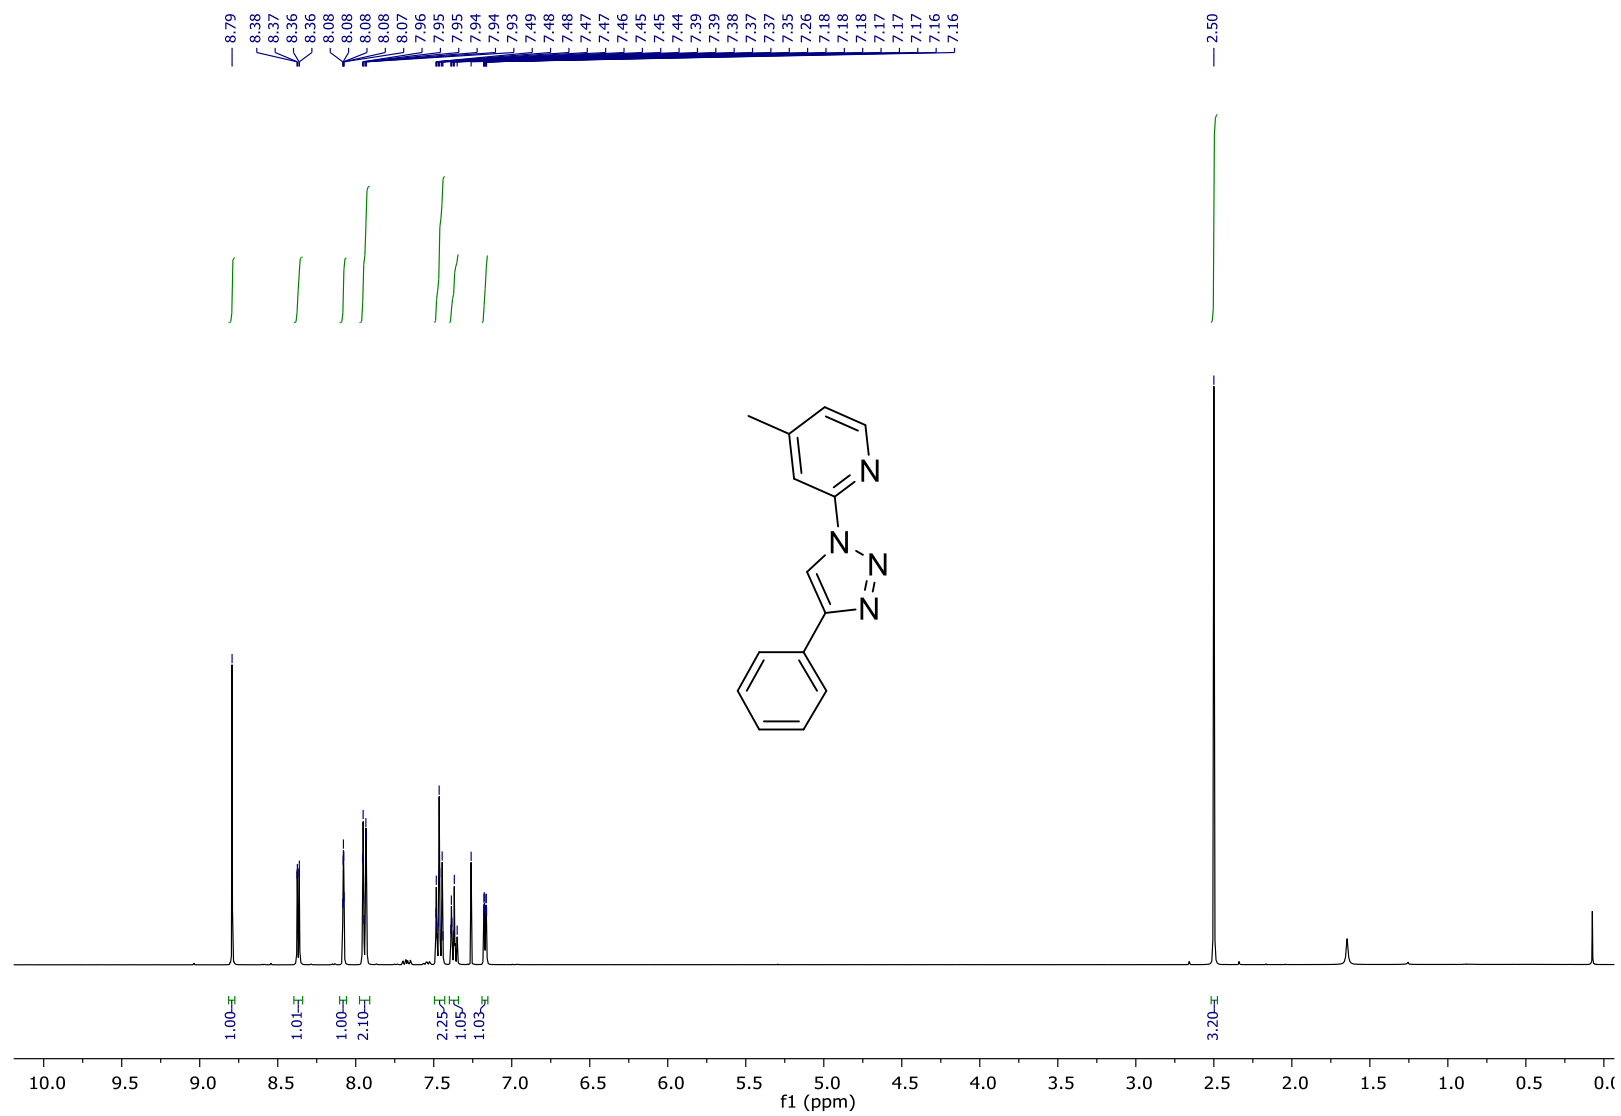

<sup>1</sup>H NMR (CDCl<sub>3</sub>, 400 MHz) spectrum of **L3\***.

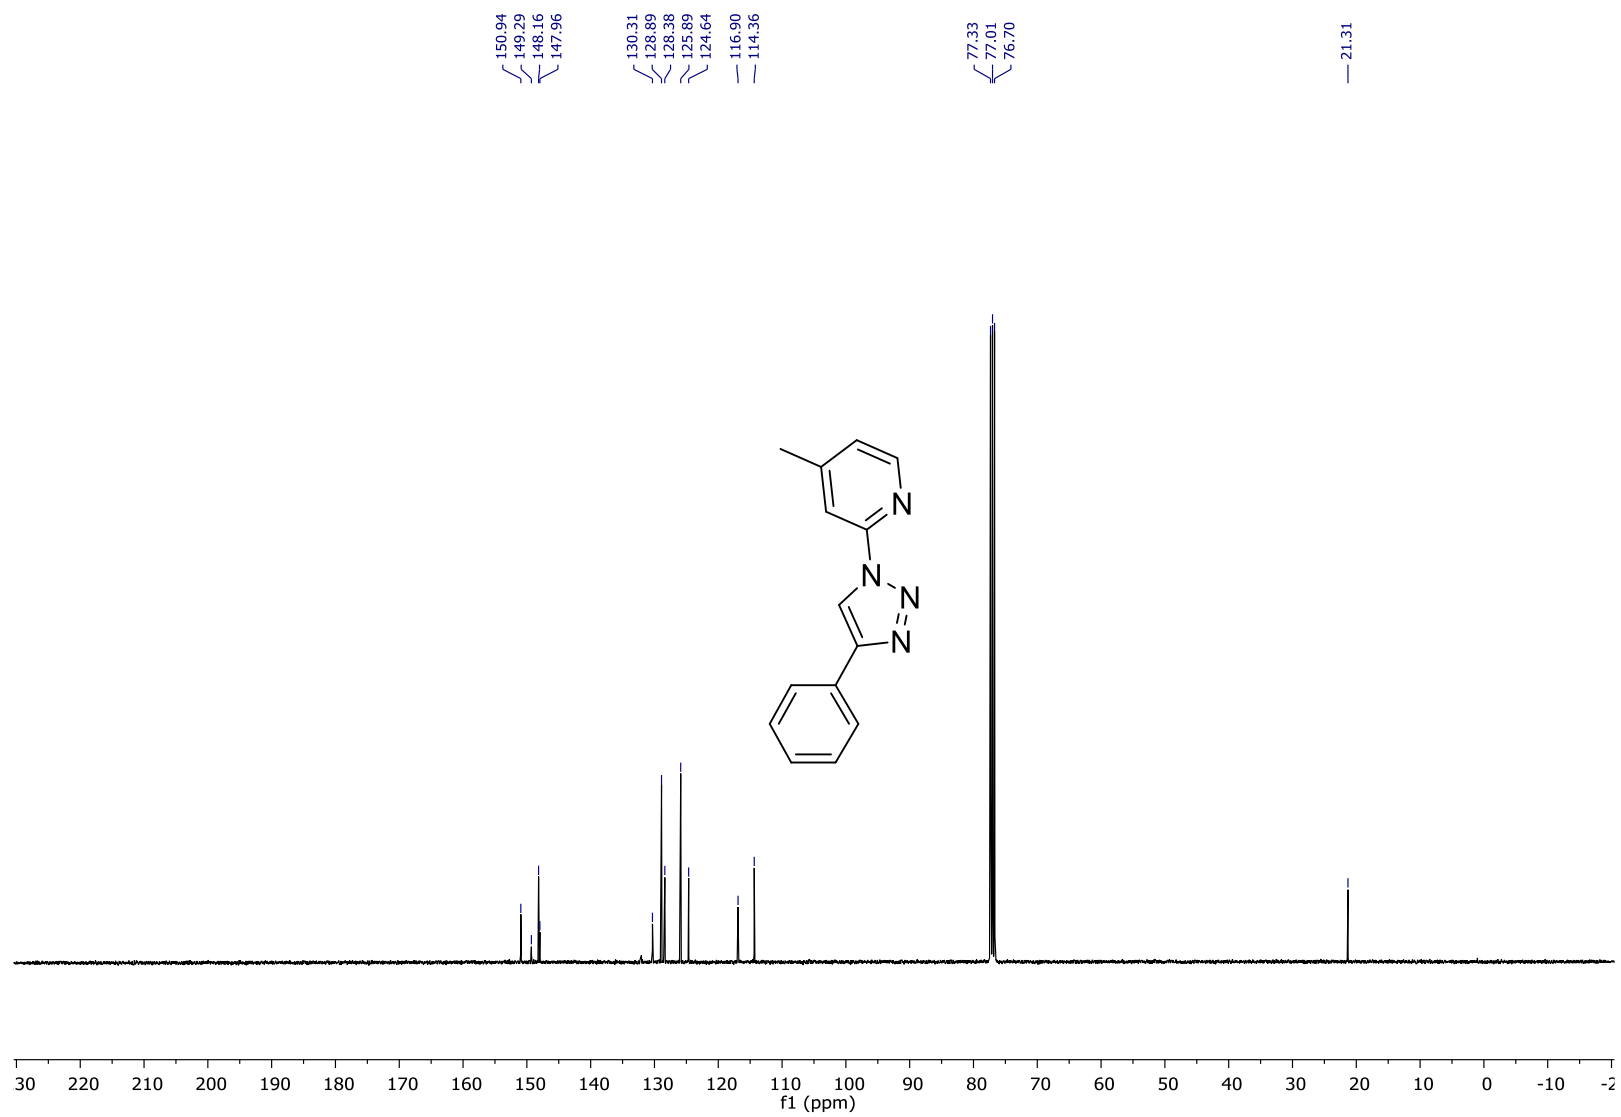

$^{13}\text{C}\{^1\text{H}\}$  NMR (CDCl<sub>3</sub>, 101 MHz) spectrum of **L3\***.

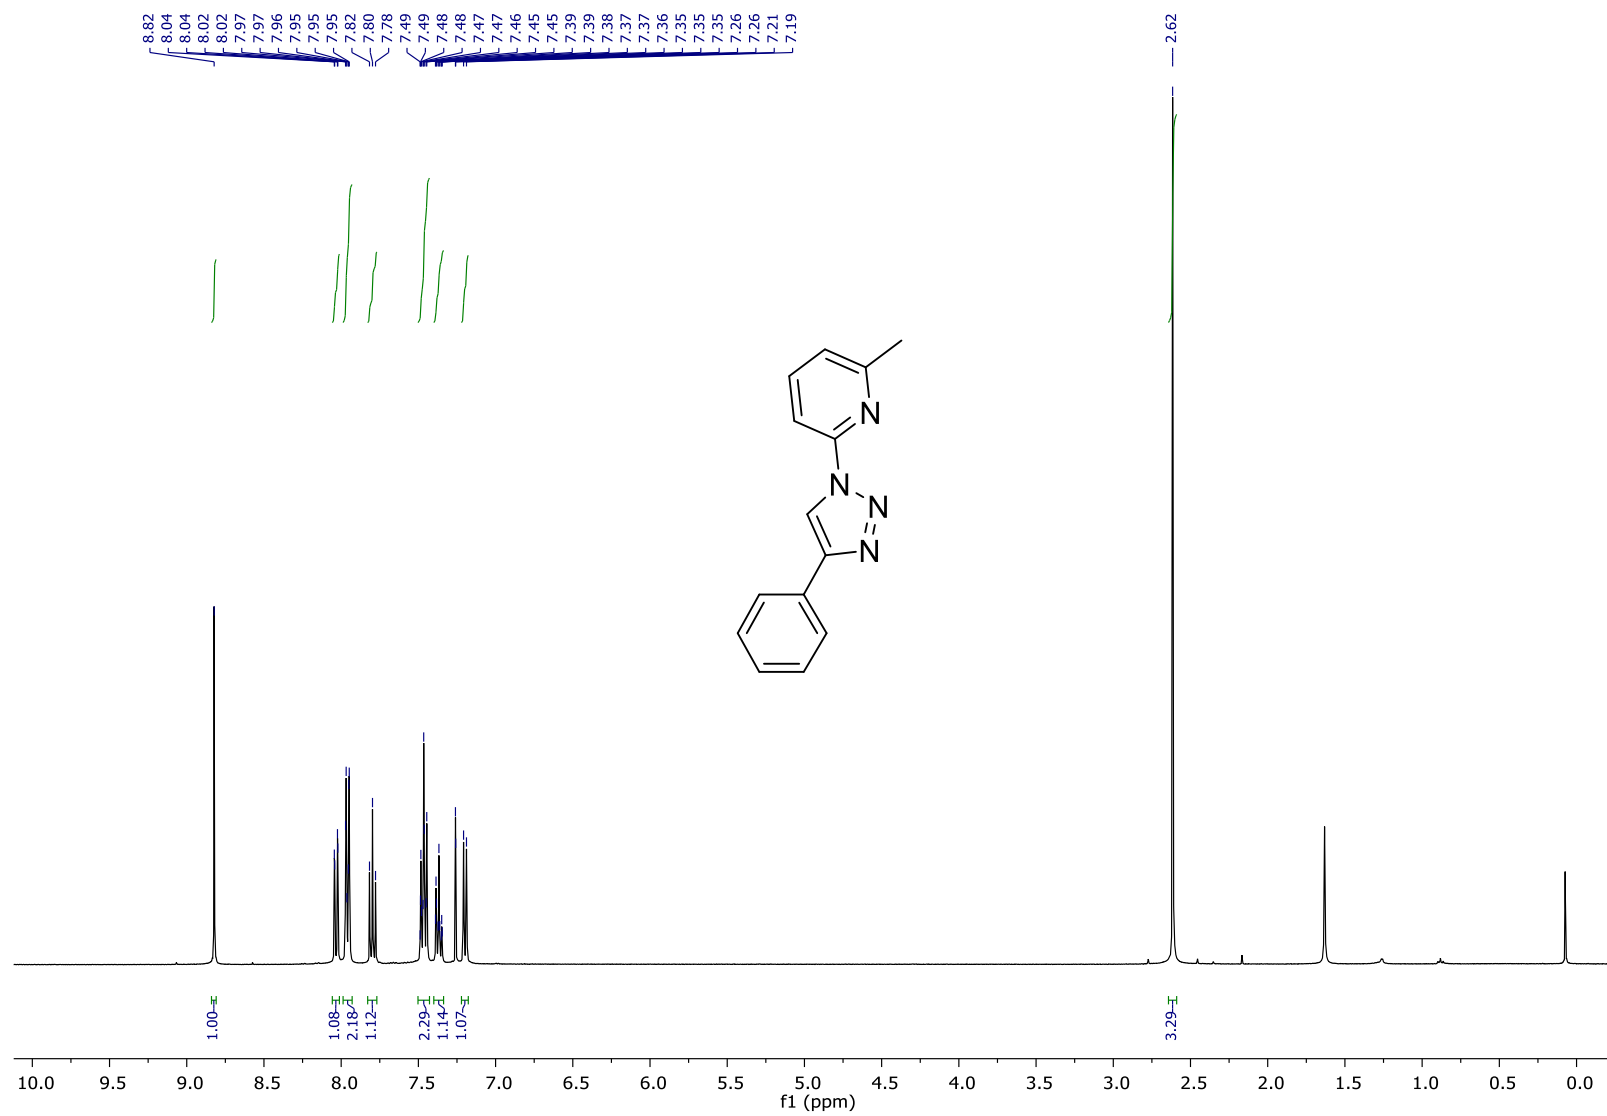

$^1\text{H}$  NMR ( $\text{CDCl}_3$ , 400 MHz) spectrum of **L4\***.

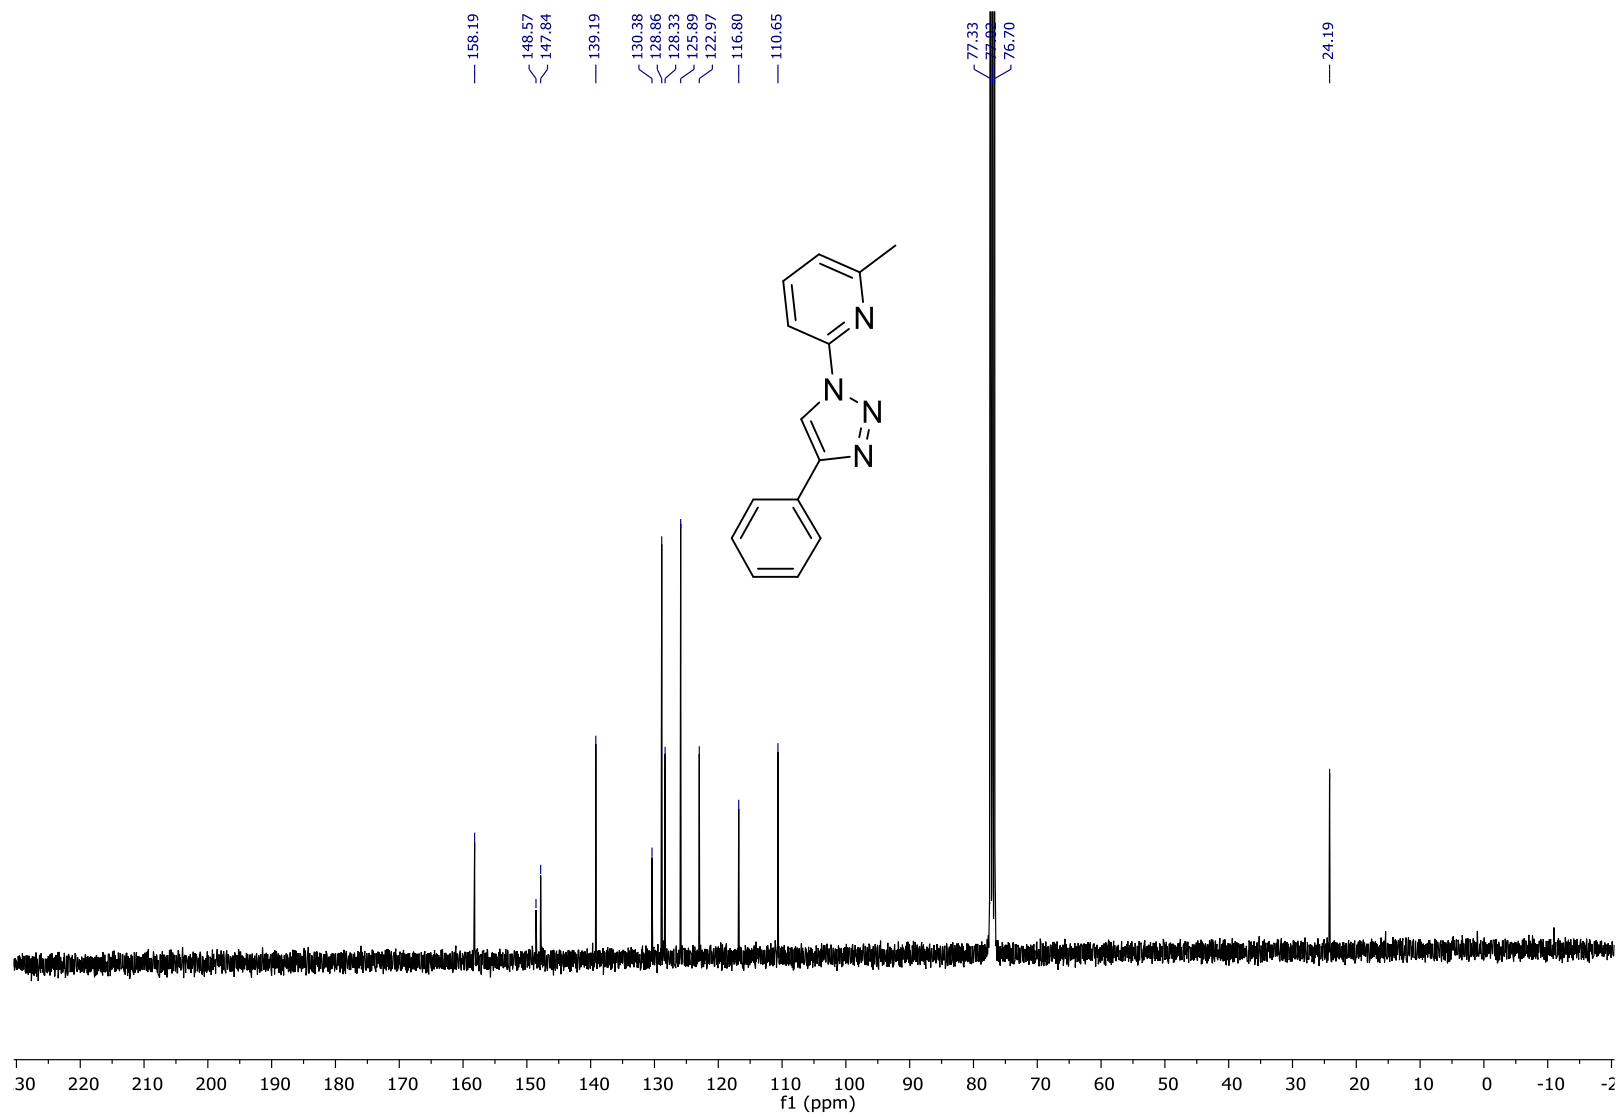

$^{13}\text{C}\{^1\text{H}\}$  NMR (CDCl<sub>3</sub>, 101 MHz) spectrum of **L4\***.



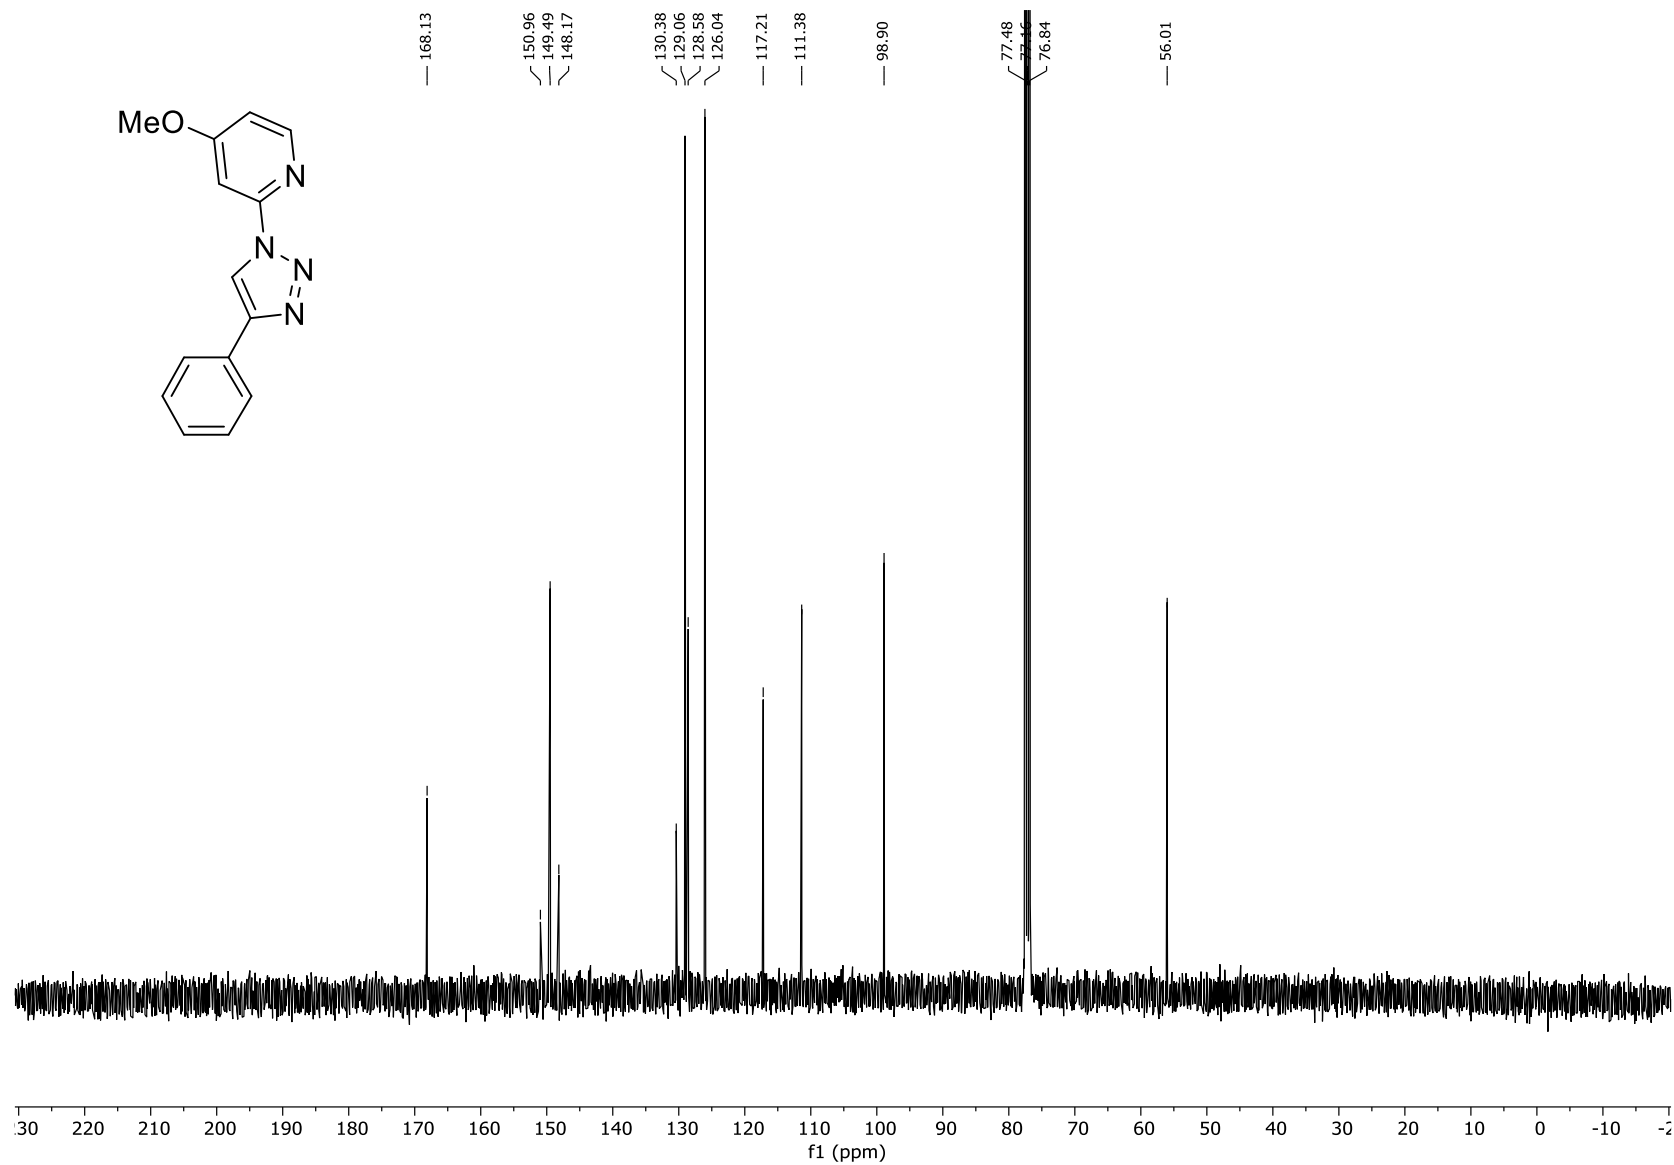

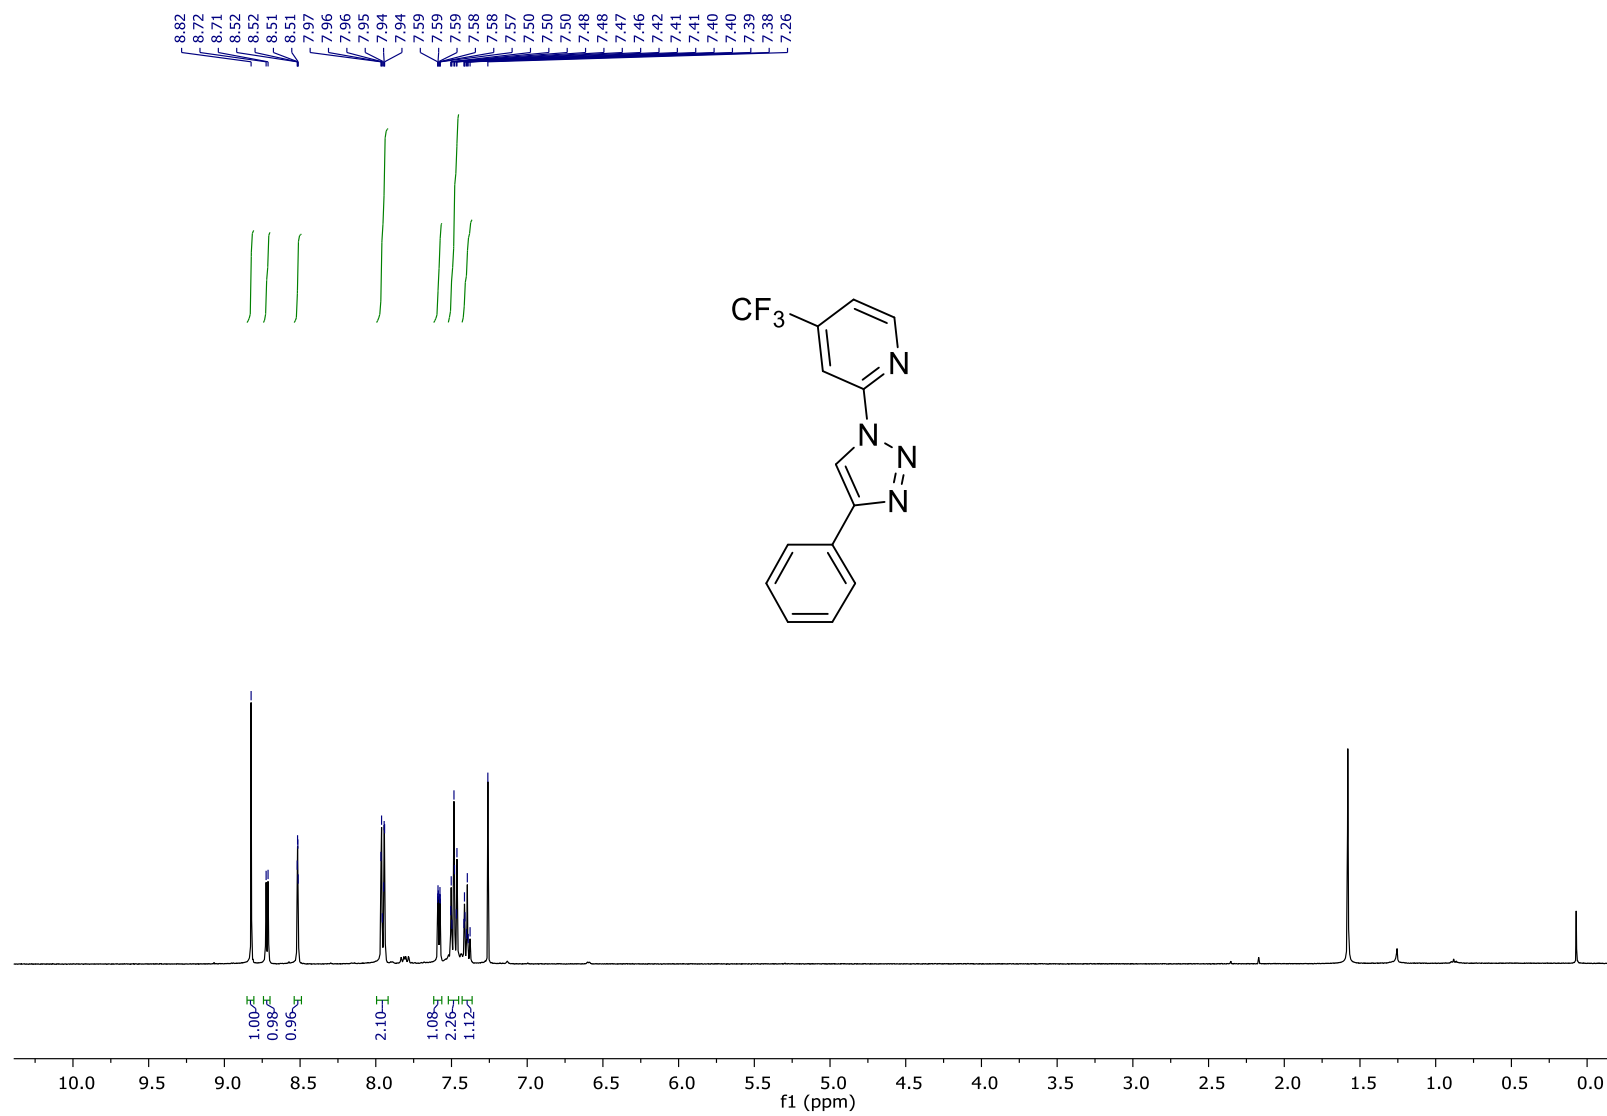

<sup>1</sup>H NMR (CDCl<sub>3</sub>, 400 MHz) spectrum of **L6\***.

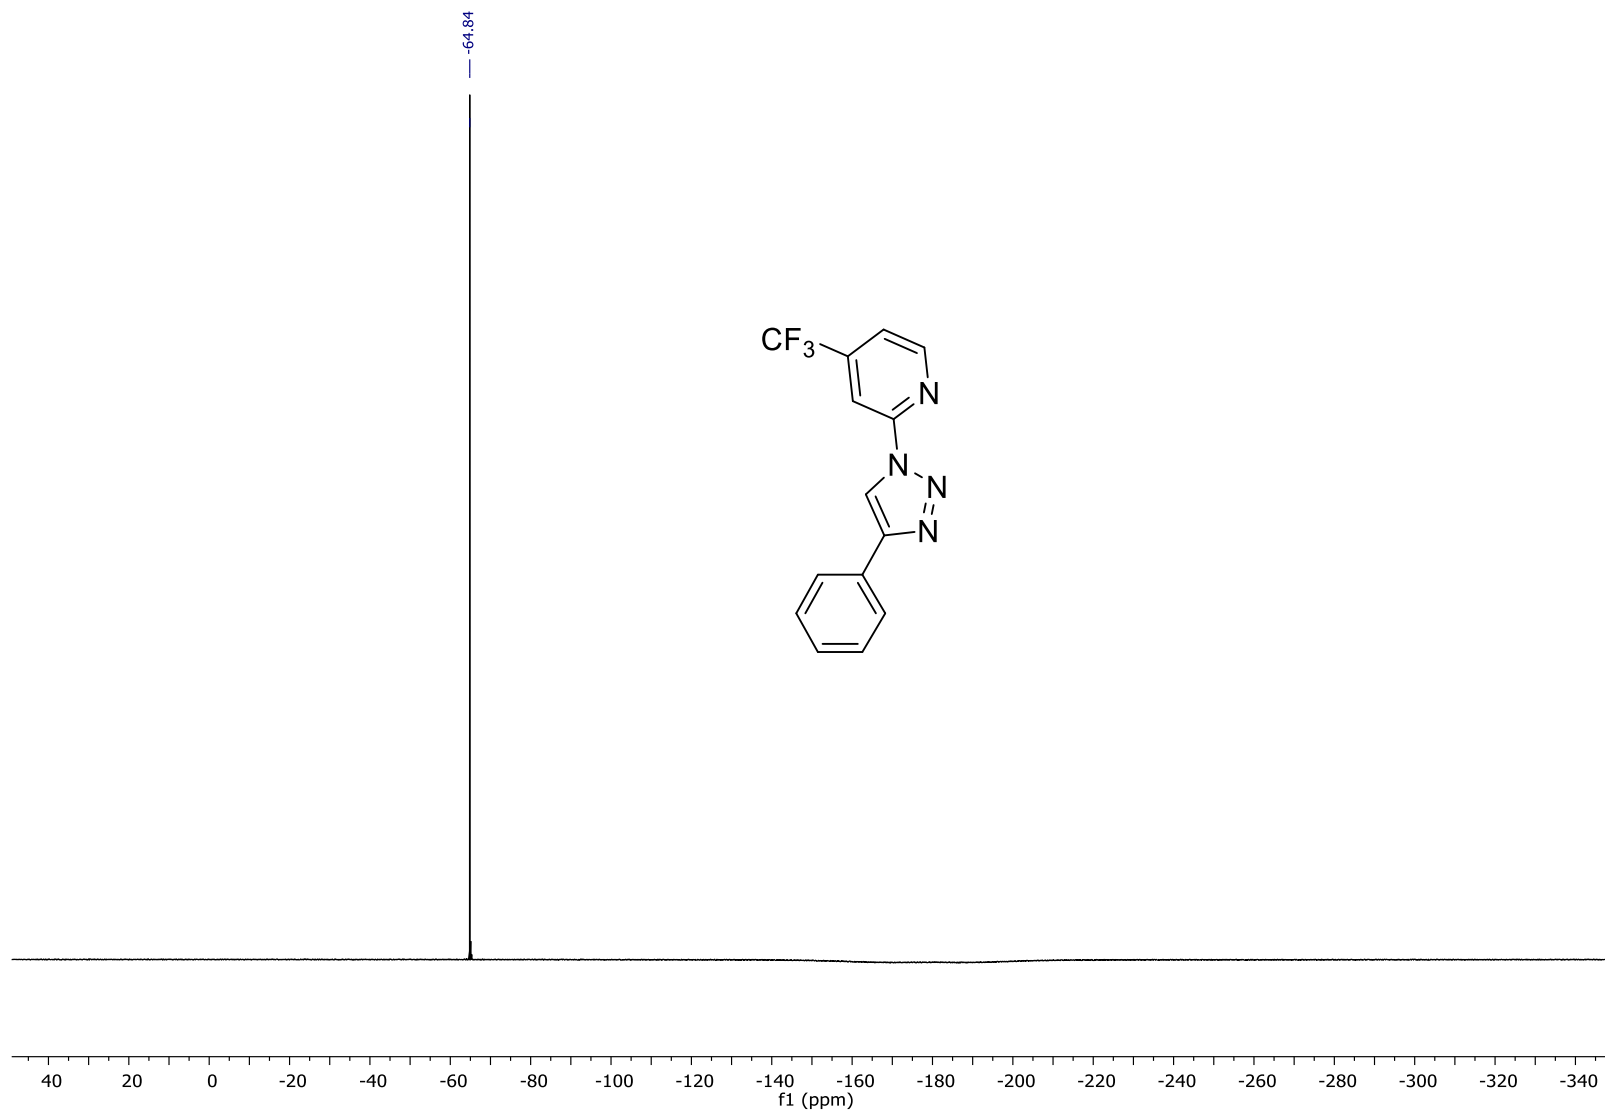

$^{19}\text{F}\{^1\text{H}\}$  NMR ( $\text{CDCl}_3$ , 376 MHz) spectrum of **L6\***.

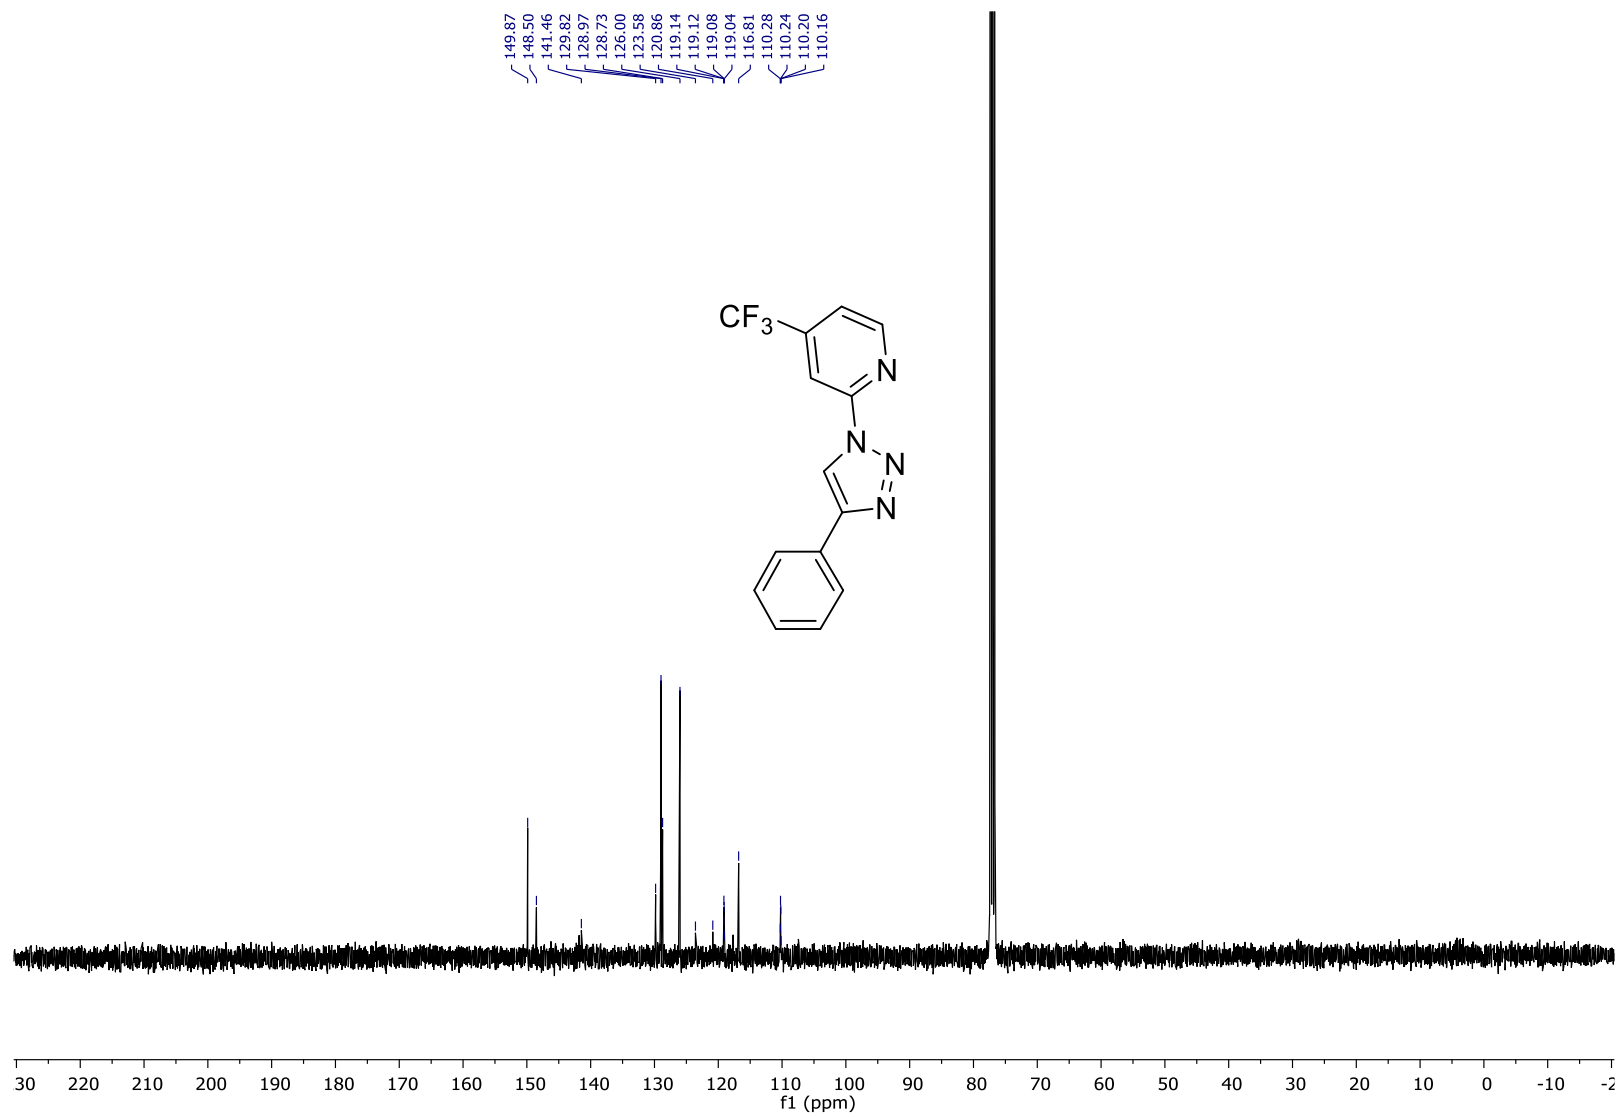

$^{13}\text{C}\{^1\text{H}\}$  NMR (CDCl<sub>3</sub>, 101 MHz) spectrum of L6\*.

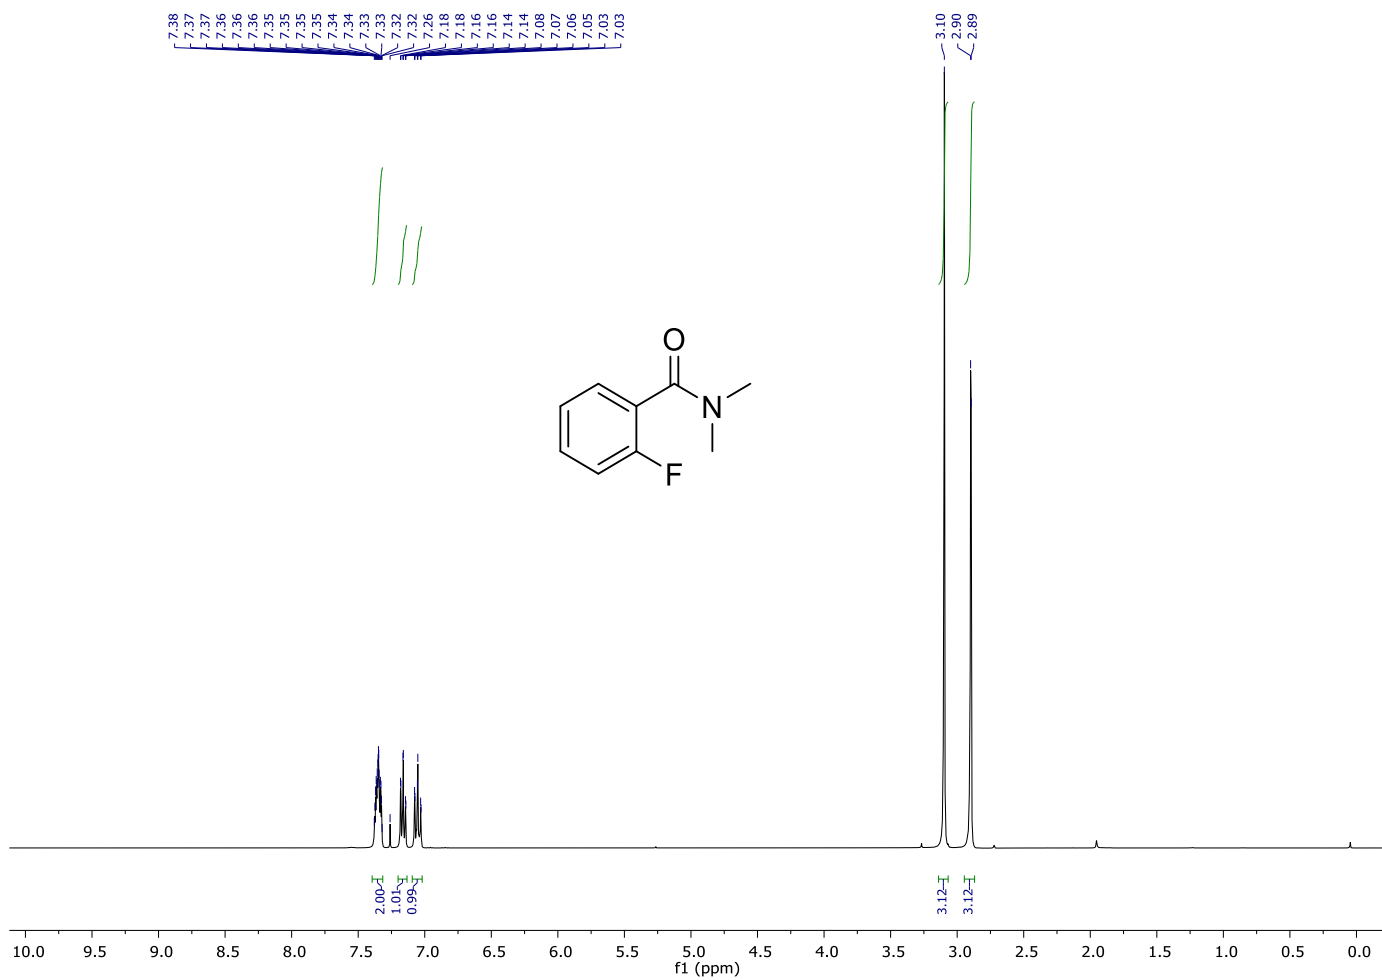

<sup>1</sup>H NMR (CDCl<sub>3</sub>, 400 MHz) spectrum of **1f**.

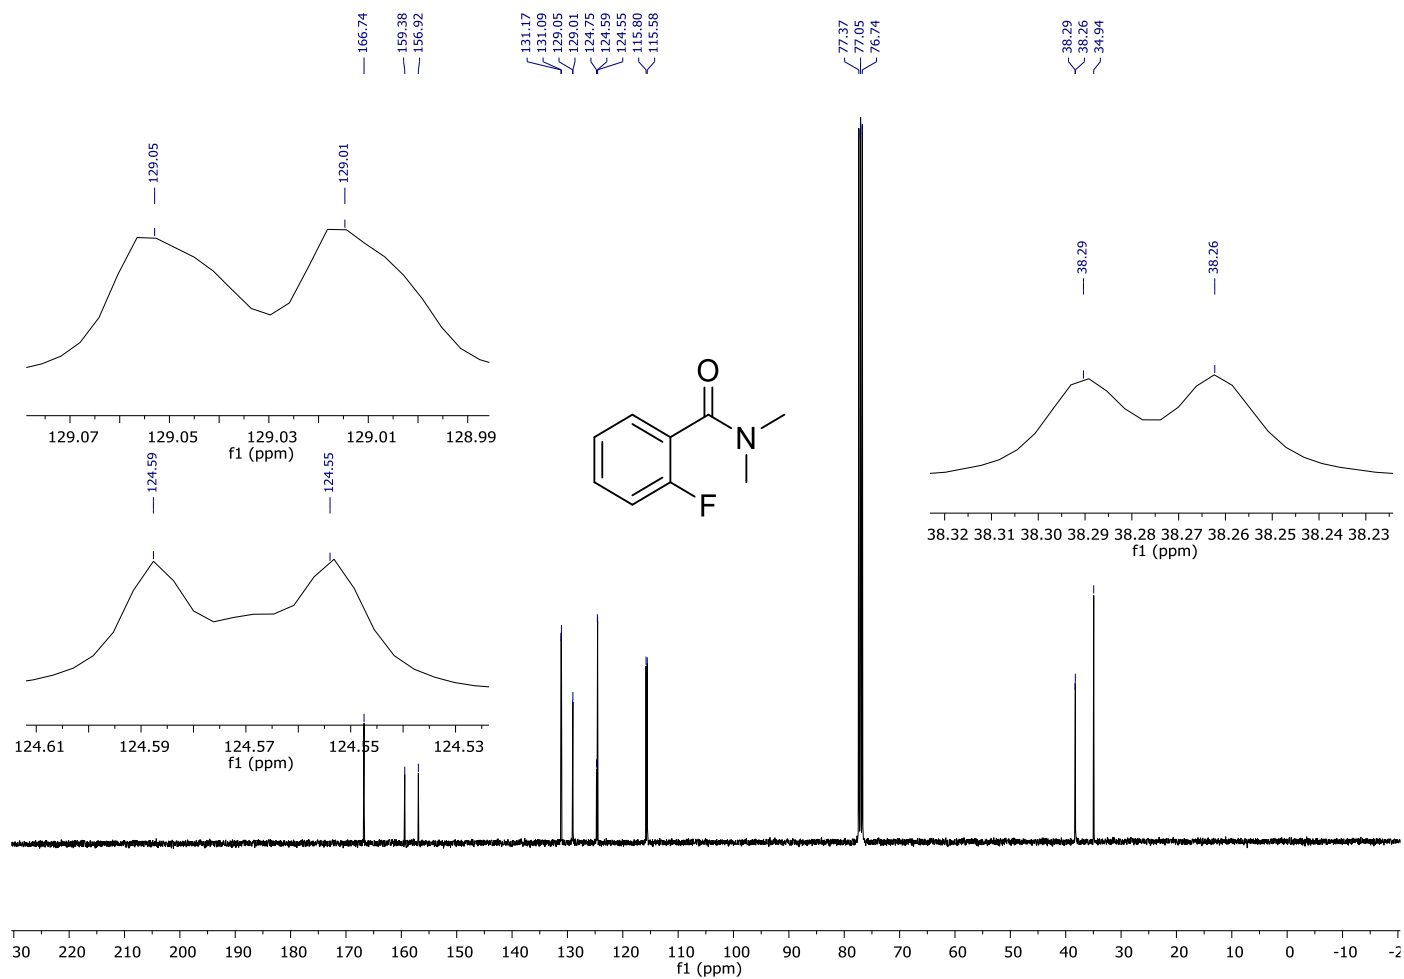

$^{13}\text{C}\{^1\text{H}\}$  NMR (CDCl<sub>3</sub>, 101 MHz) spectrum of **1f**.

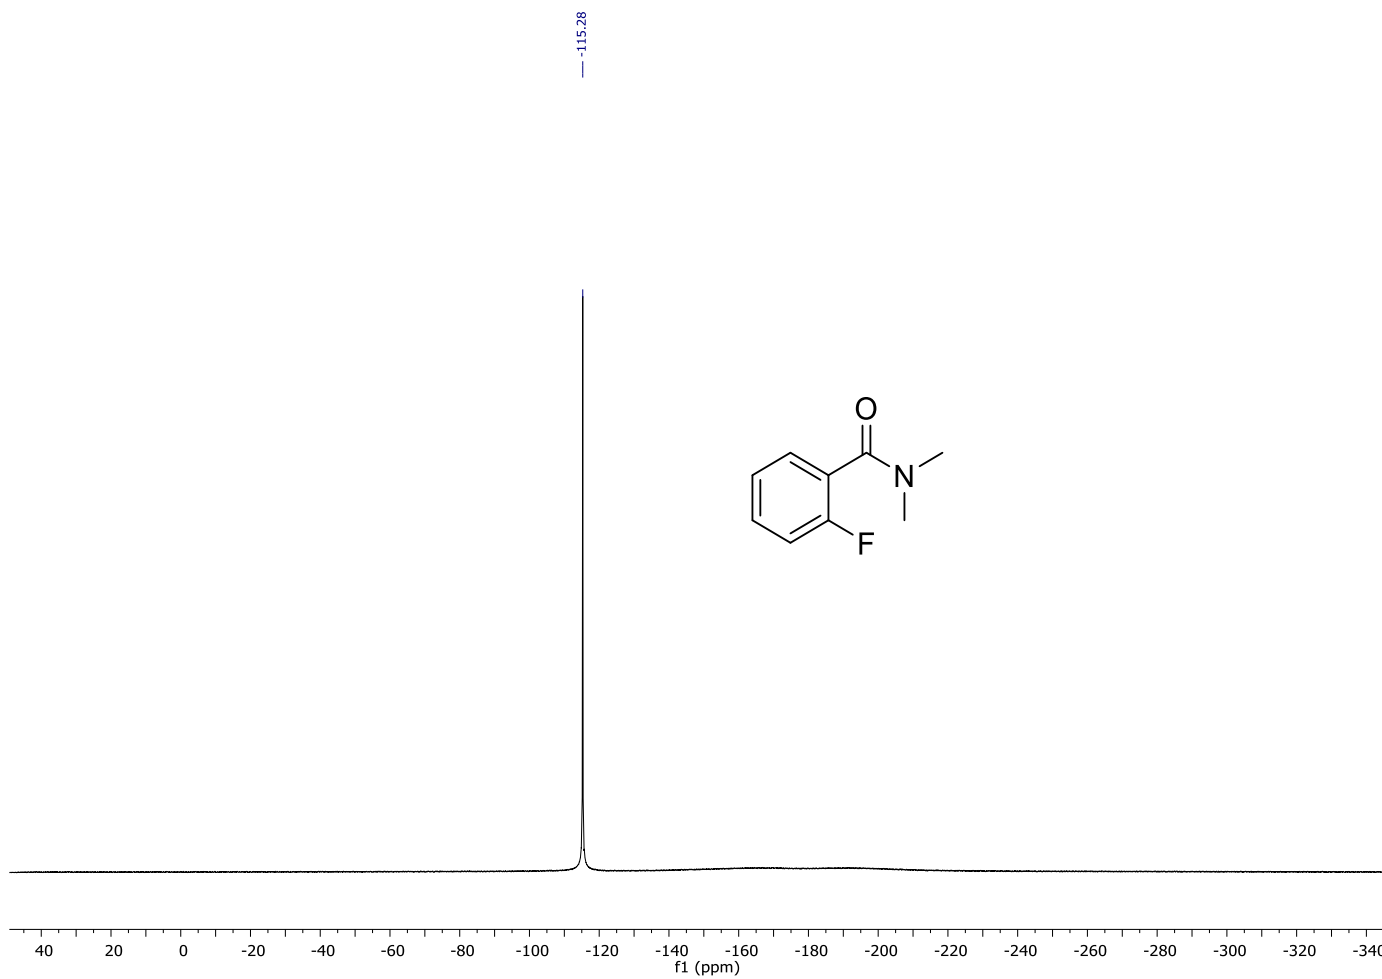

$^{19}\text{F}\{^1\text{H}\}$  NMR (CDCl<sub>3</sub>, 376 MHz) spectrum of **1f**.

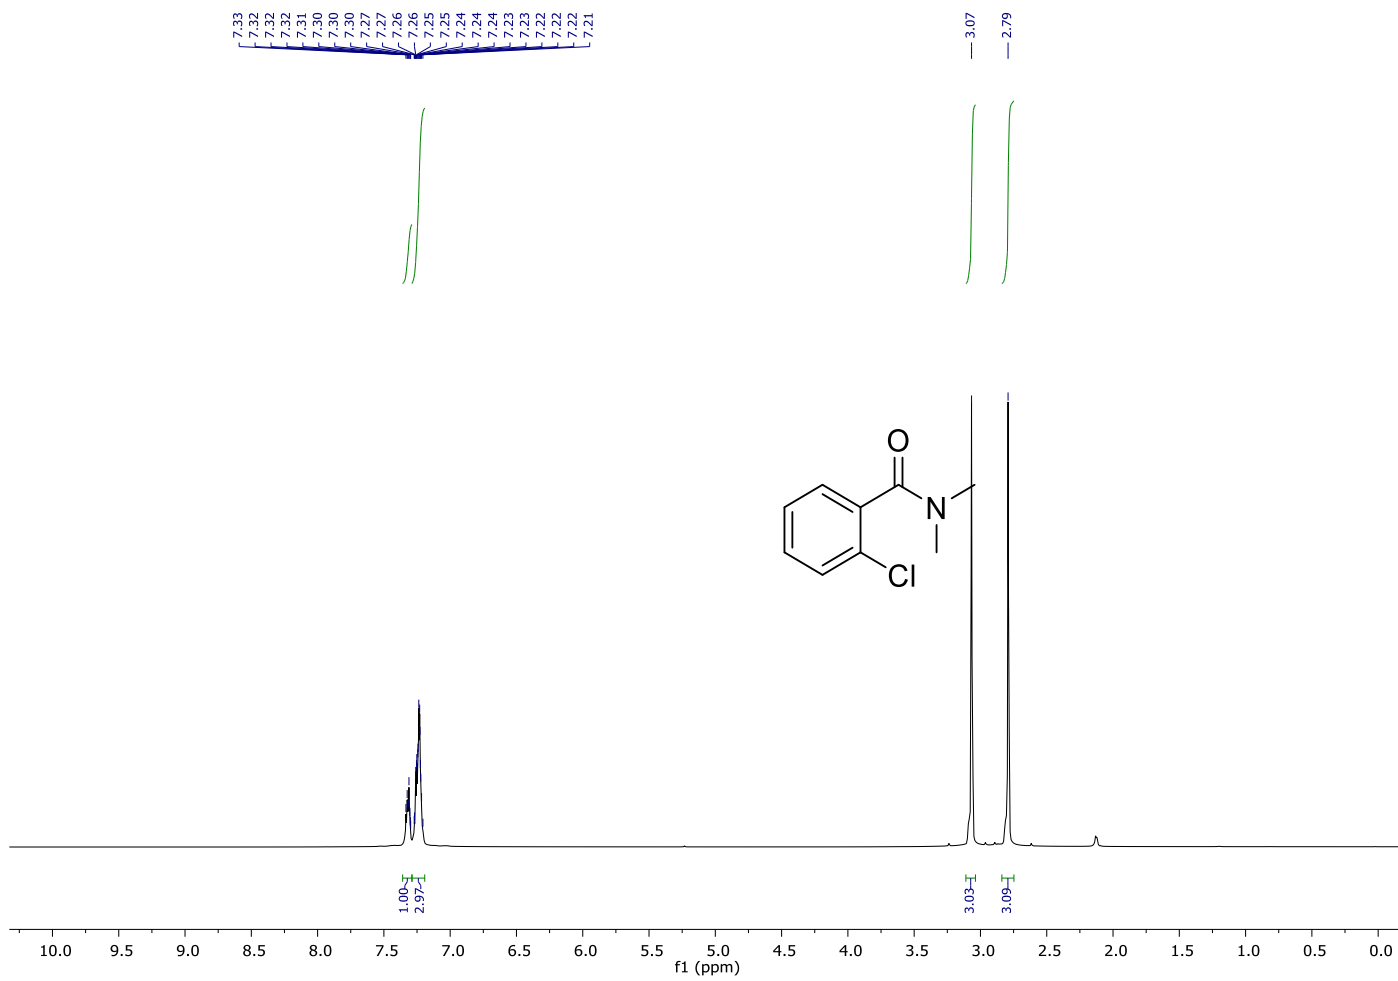

$^1\text{H}$  NMR ( $\text{CDCl}_3$ , 400 MHz) spectrum of **1g**.

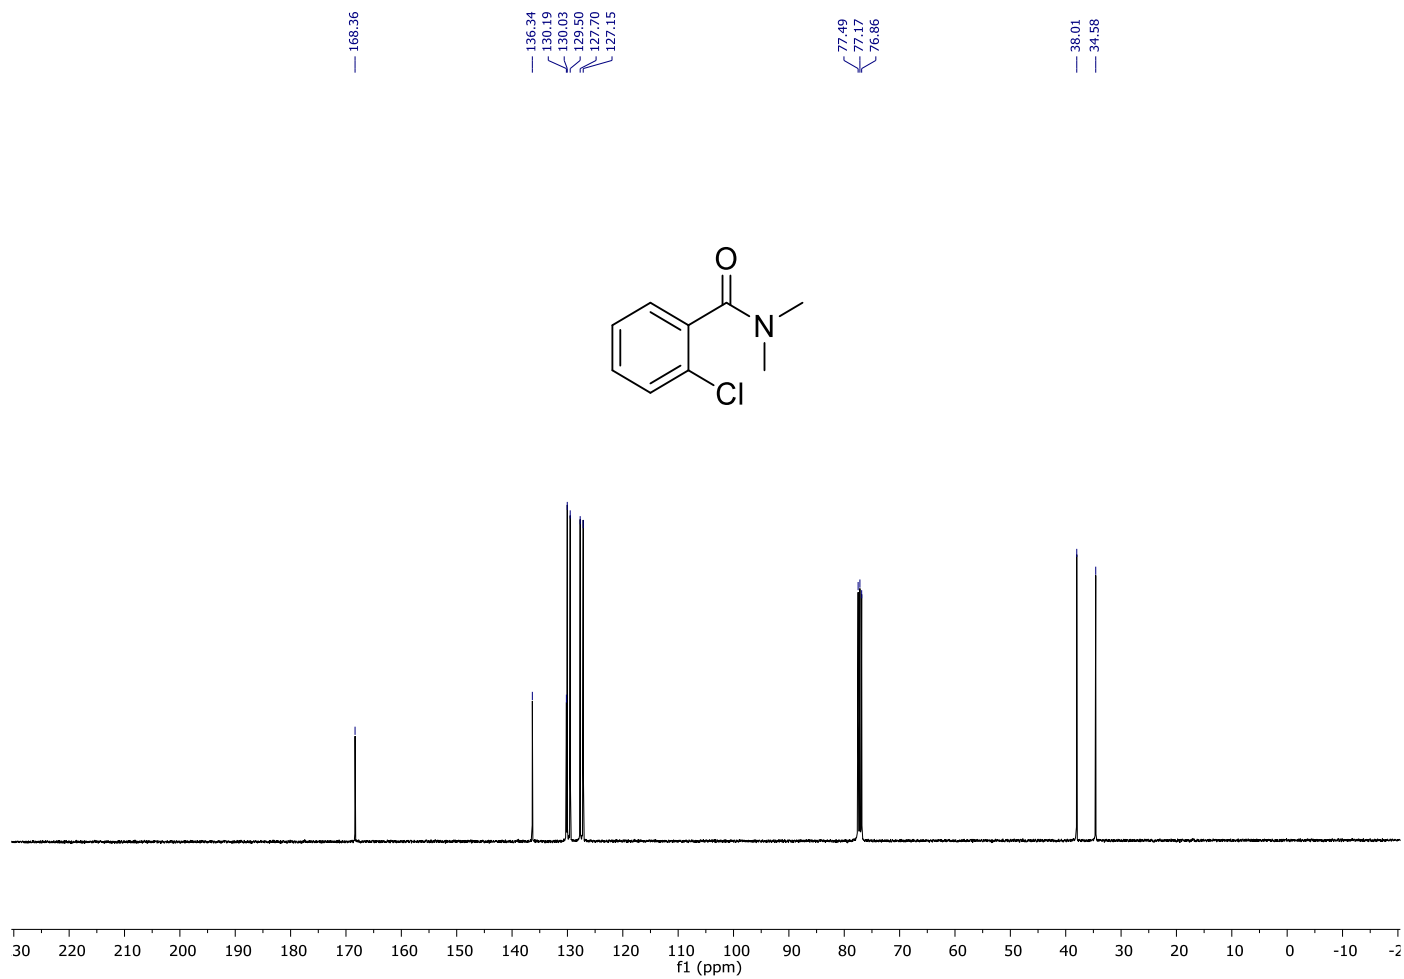

$^{13}\text{C}\{^1\text{H}\}$  NMR (CDCl<sub>3</sub>, 101 MHz) spectrum of **1g**.

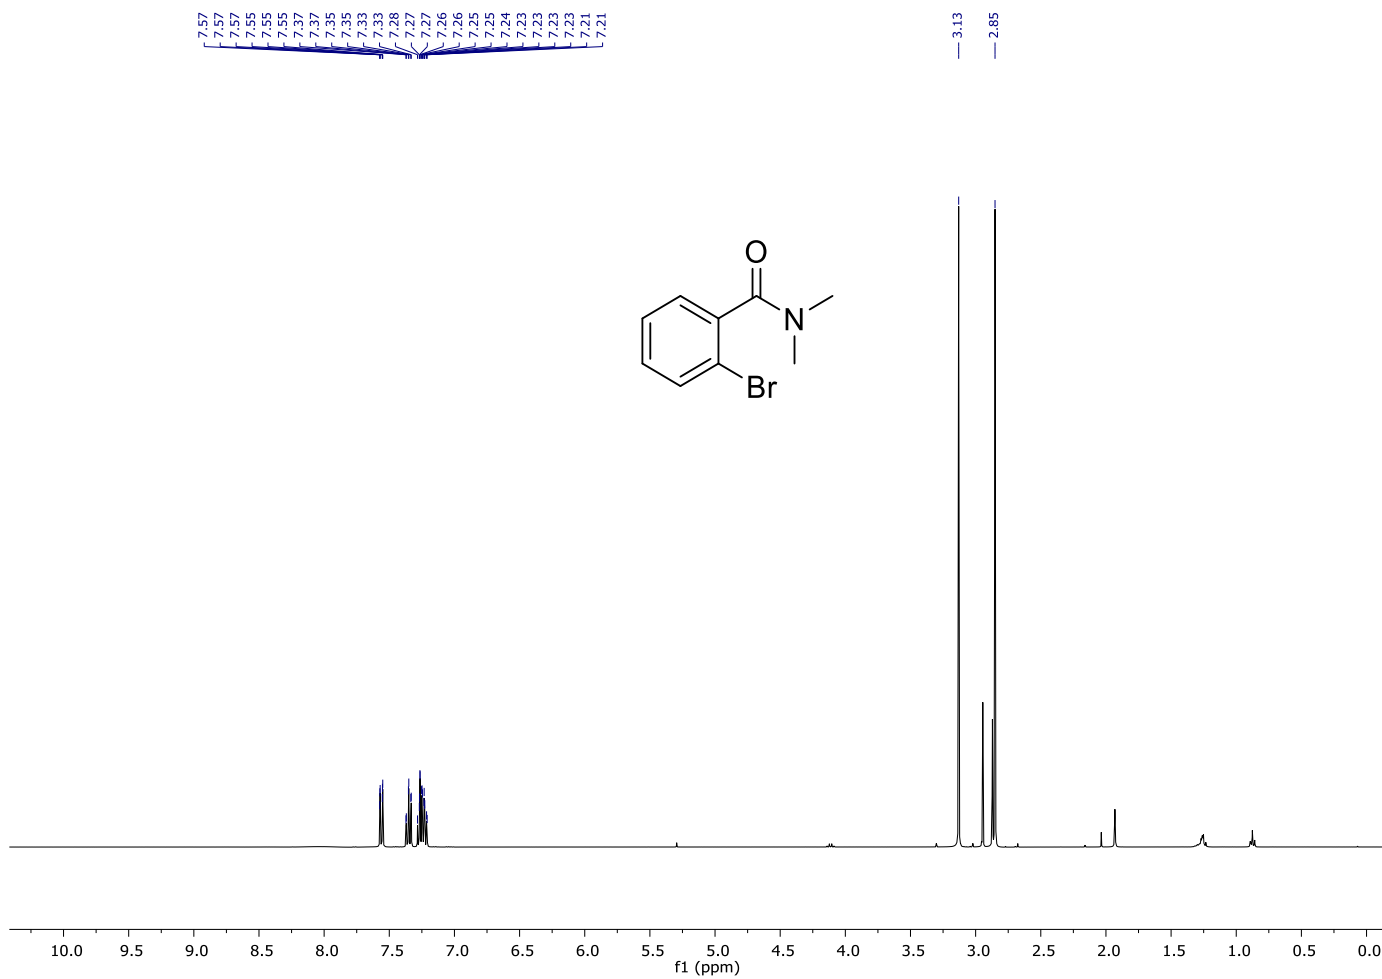

<sup>1</sup>H NMR (CDCl<sub>3</sub>, 400 MHz) spectrum of **1h**.

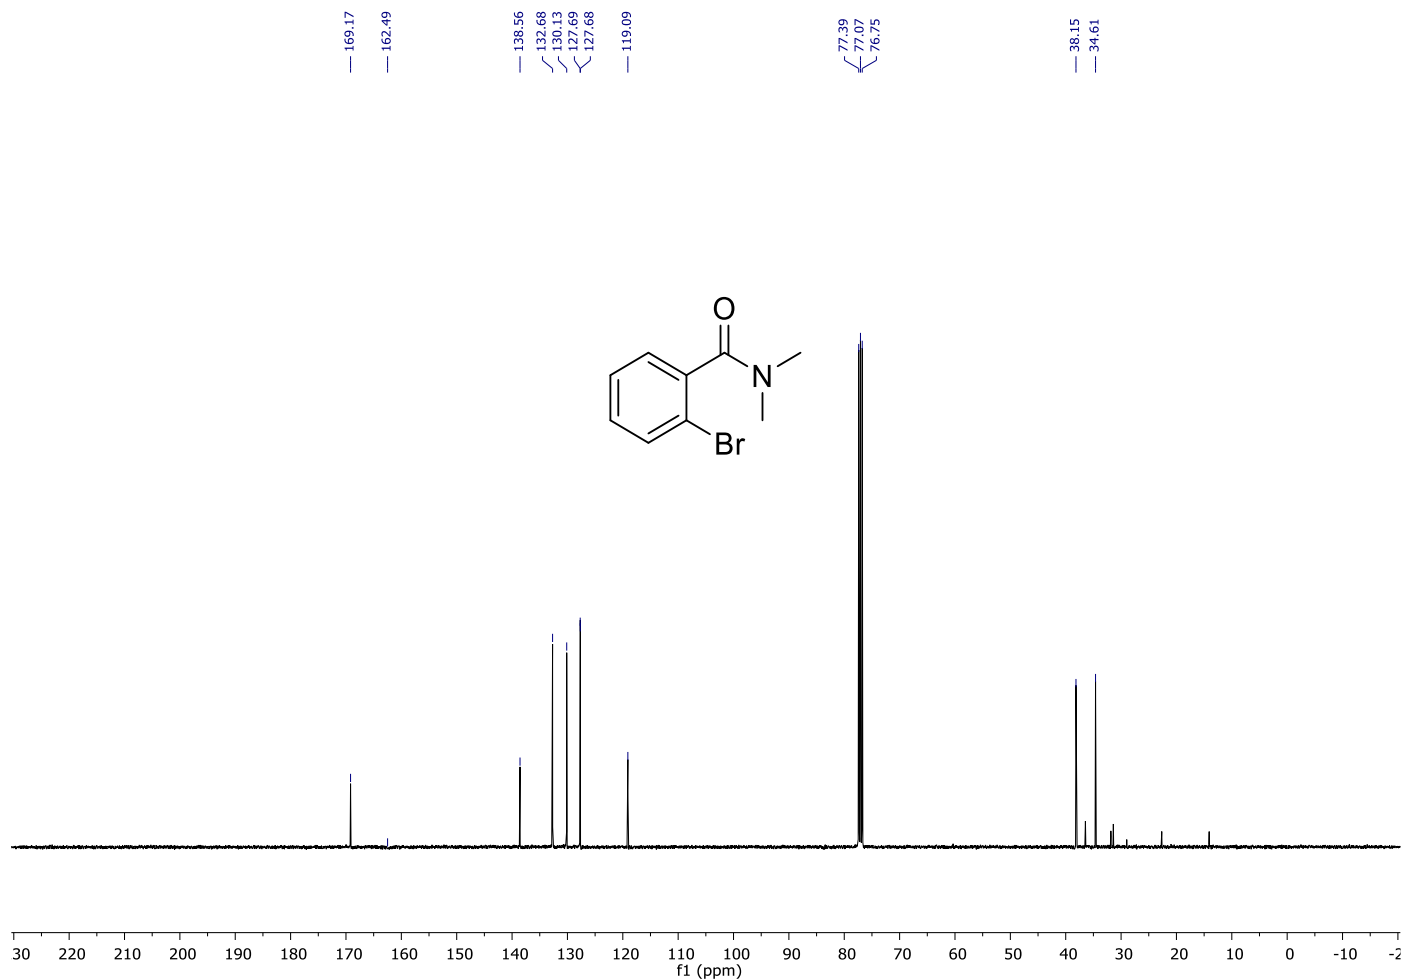

$^{13}\text{C}\{^1\text{H}\}$  NMR (CDCl<sub>3</sub>, 101 MHz) spectrum of **1h**.

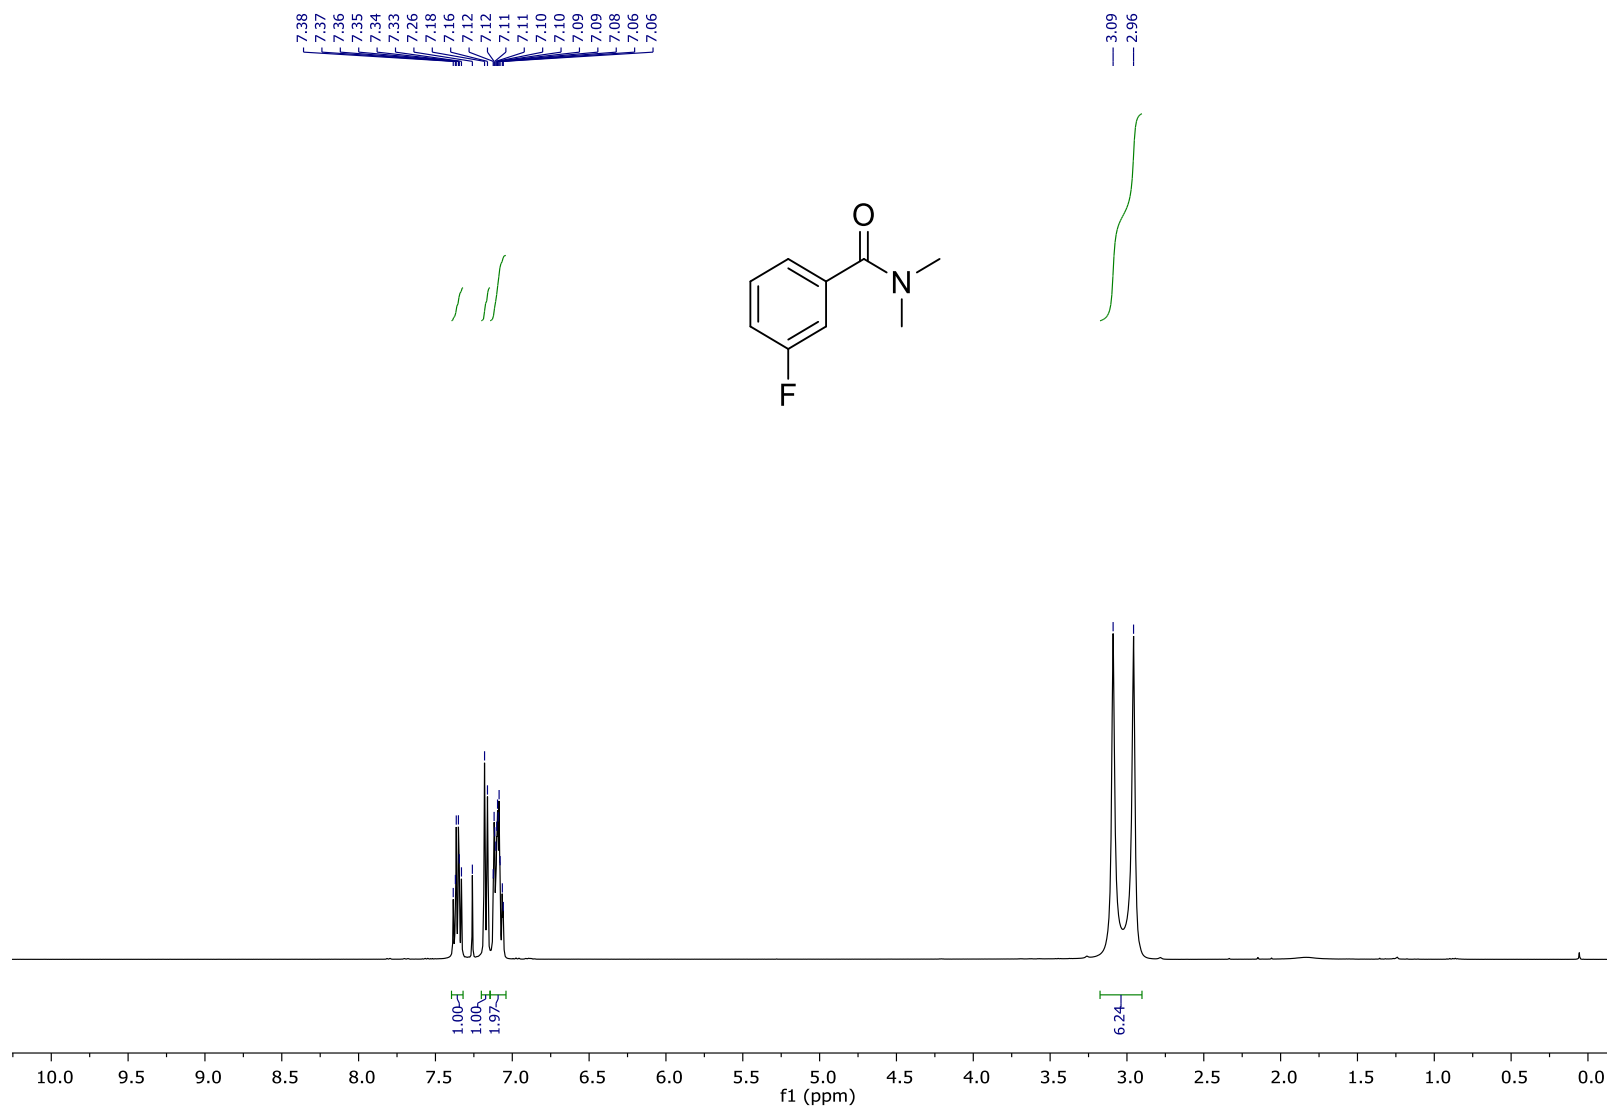

<sup>1</sup>H NMR (CDCl<sub>3</sub>, 400 MHz) spectrum of **1i**.

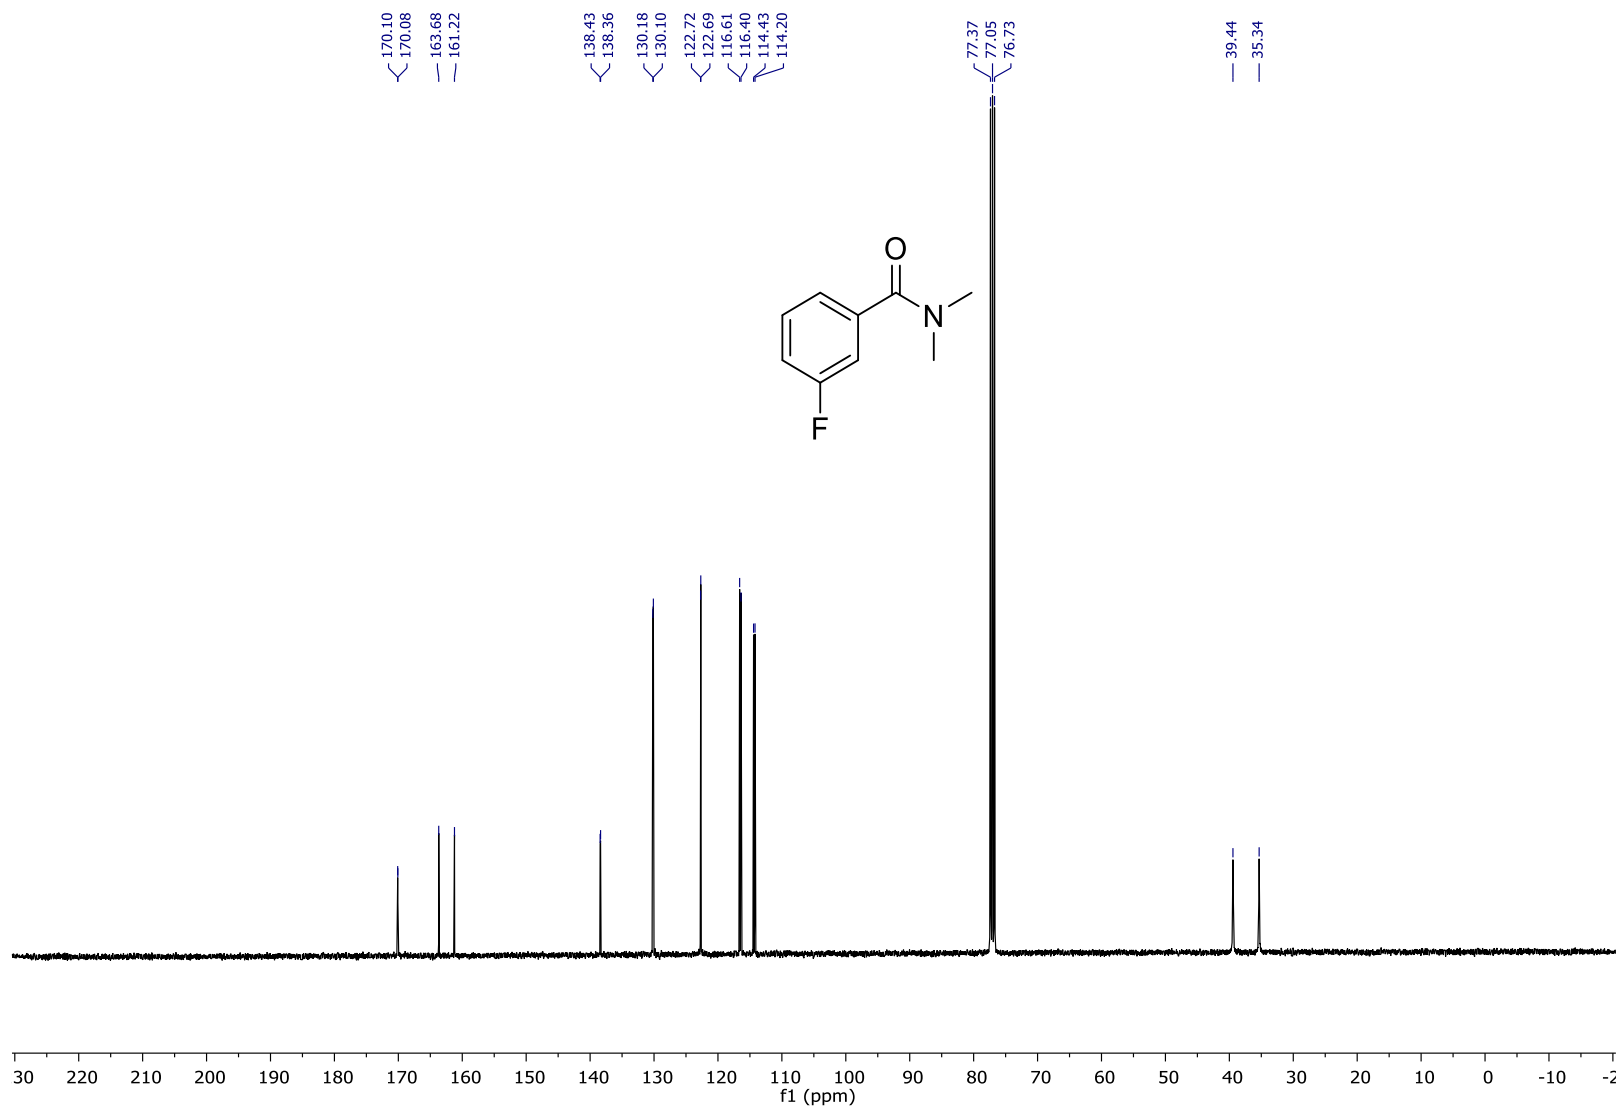

$^{13}\text{C}\{^1\text{H}\}$  NMR (CDCl<sub>3</sub>, 101 MHz) spectrum of **1i**.

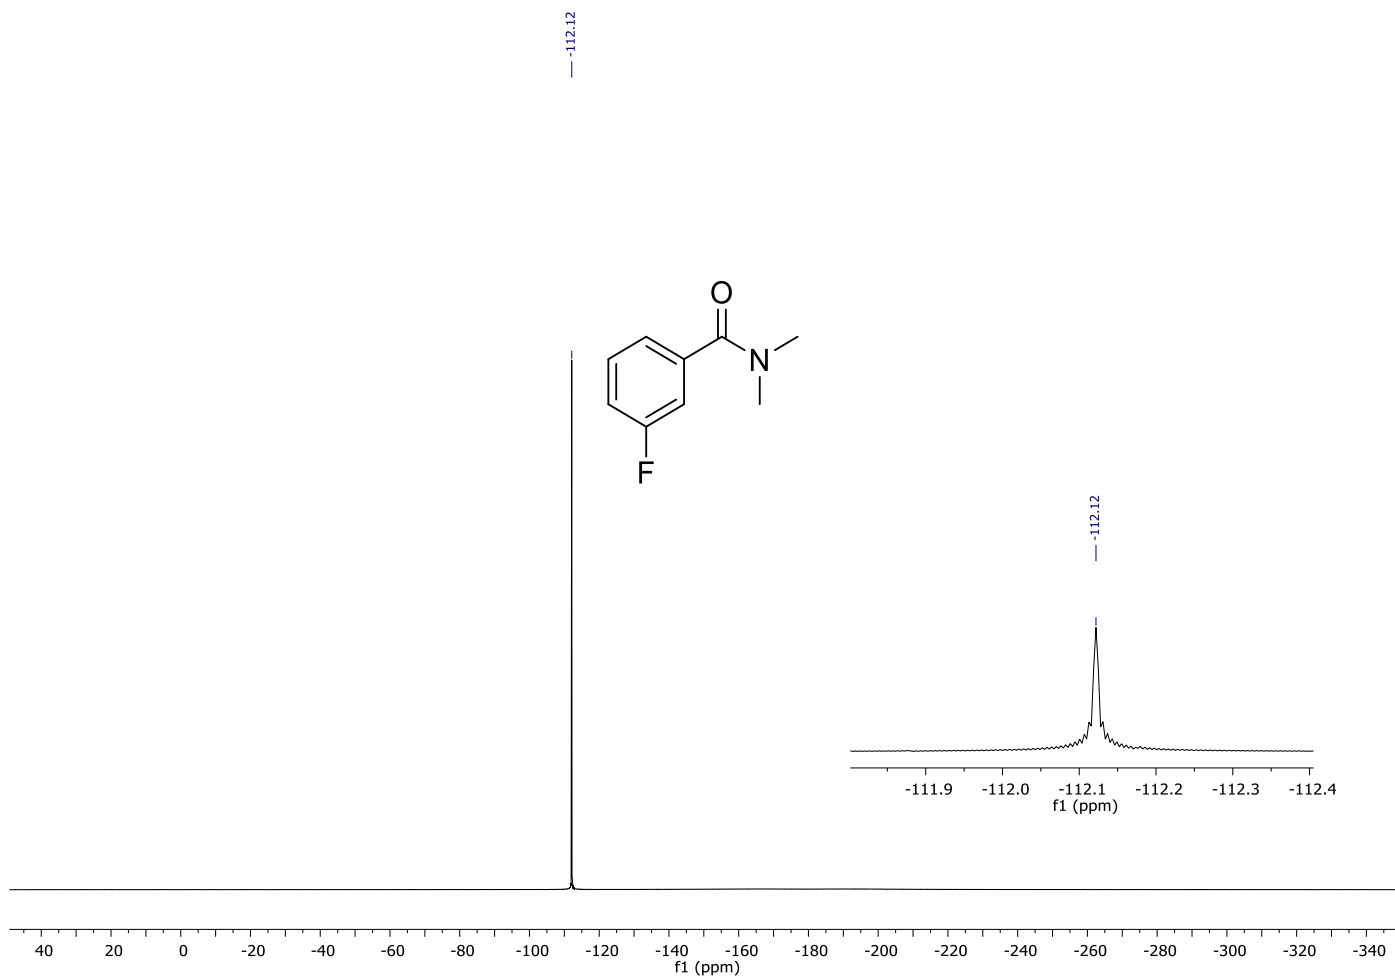

$^{19}\text{F}\{^1\text{H}\}$  NMR (CDCl<sub>3</sub>, 376 MHz) spectrum of **1i**.

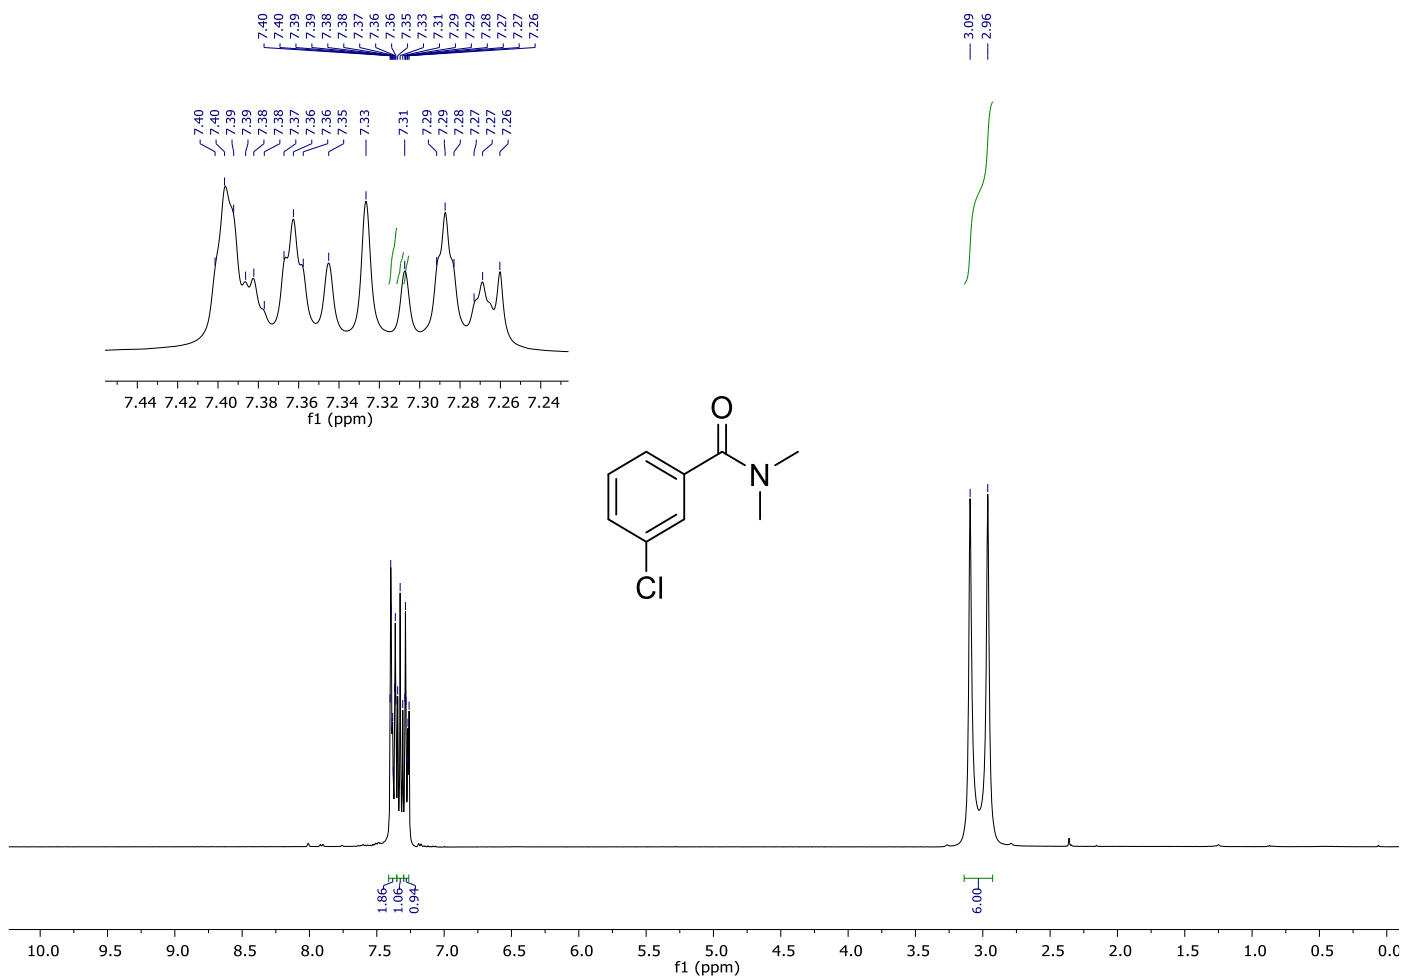

$^1\text{H}$  NMR ( $\text{CDCl}_3$ , 400 MHz) spectrum of **1j**.

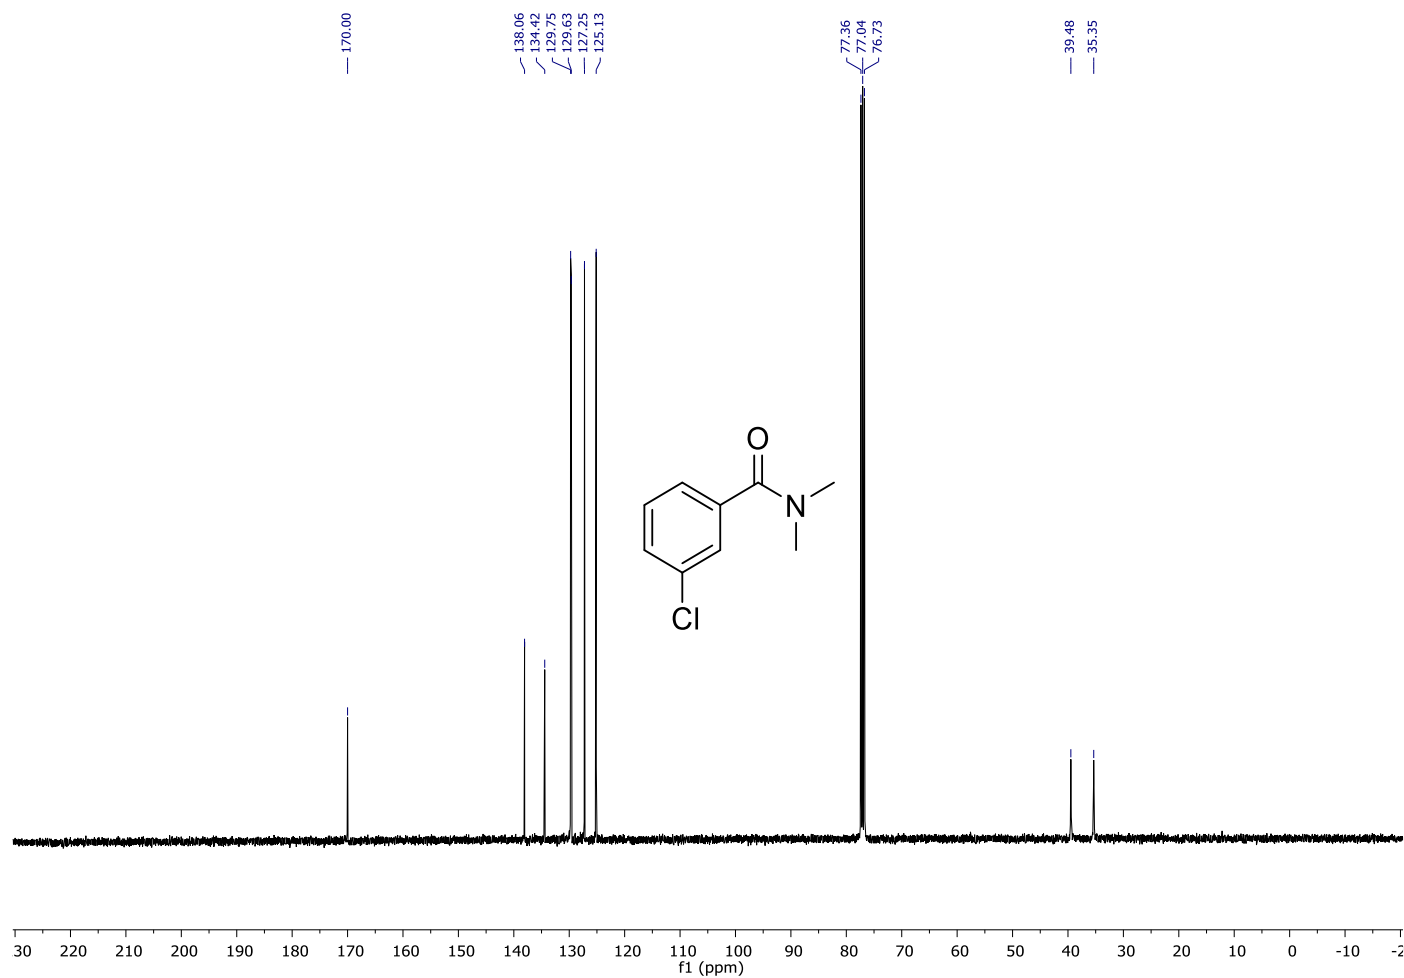

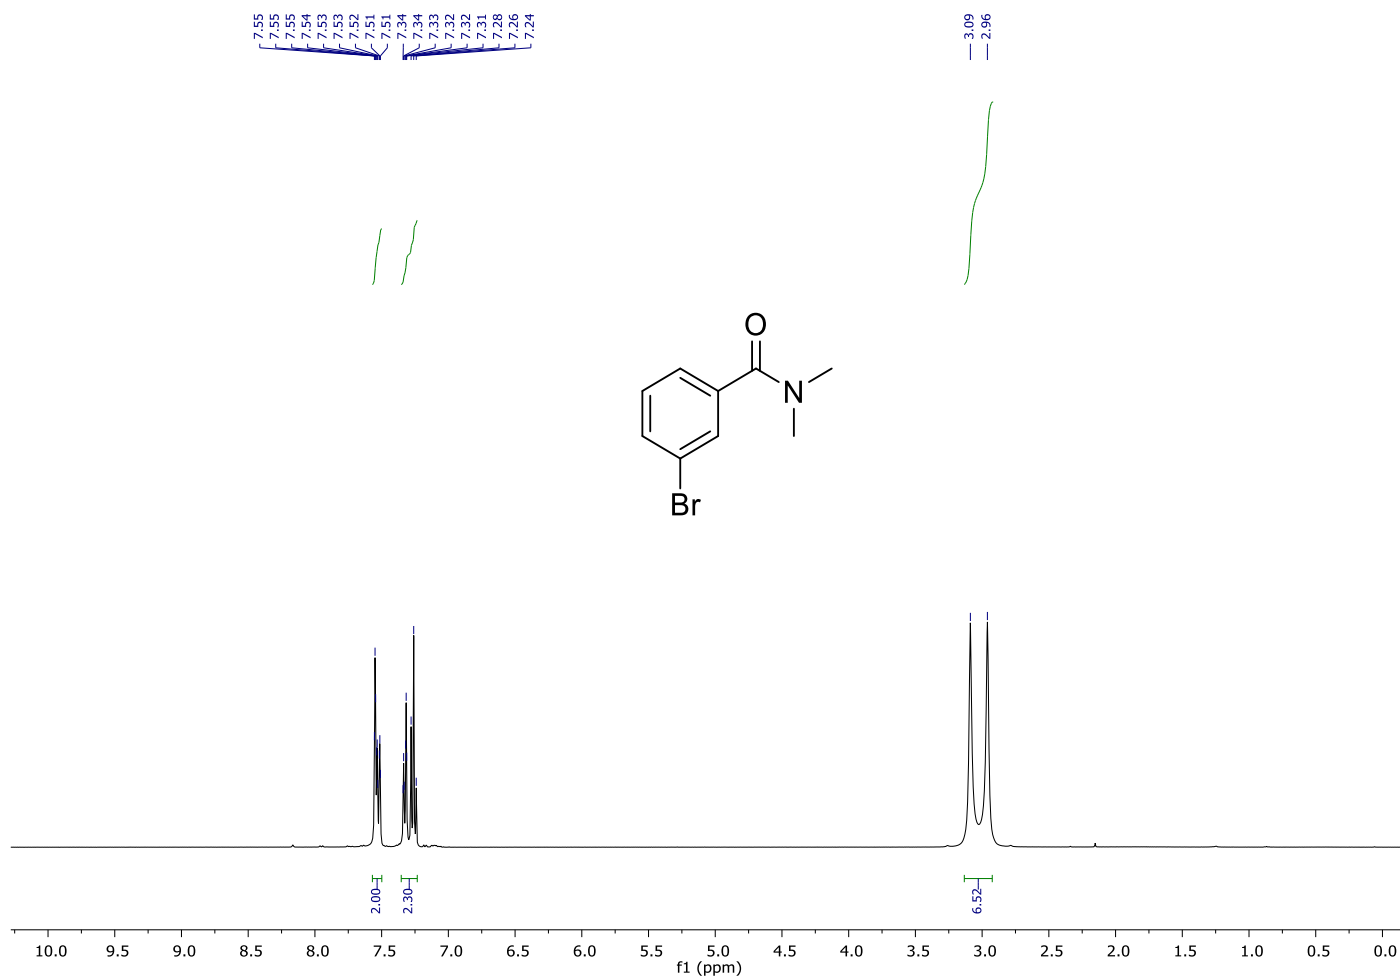

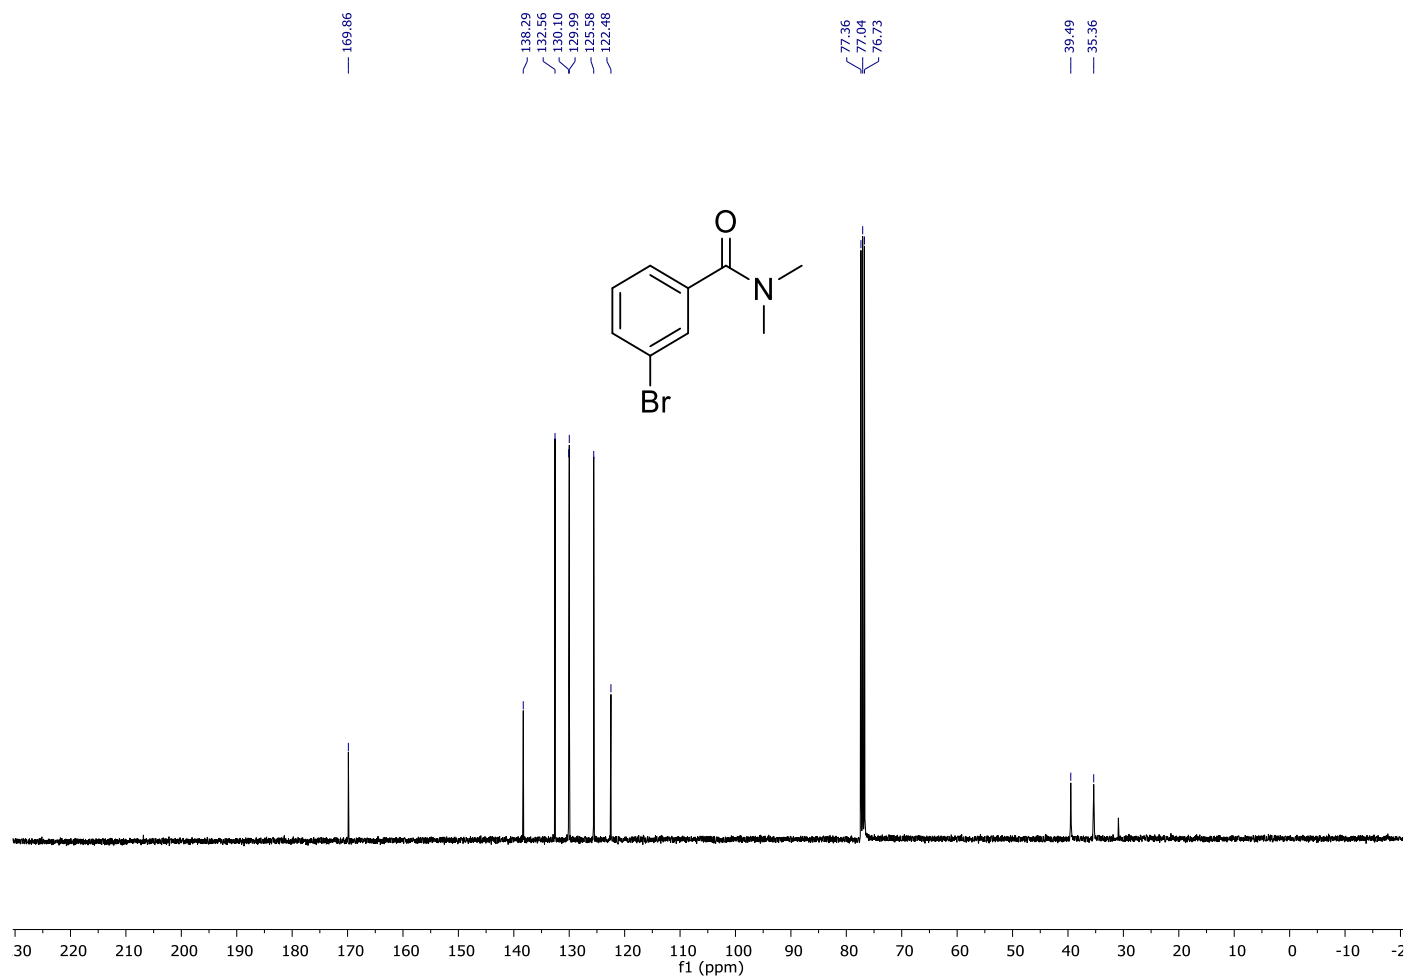

$^{13}\text{C}\{^1\text{H}\}$  NMR (CDCl<sub>3</sub>, 101 MHz) spectrum of **1k**

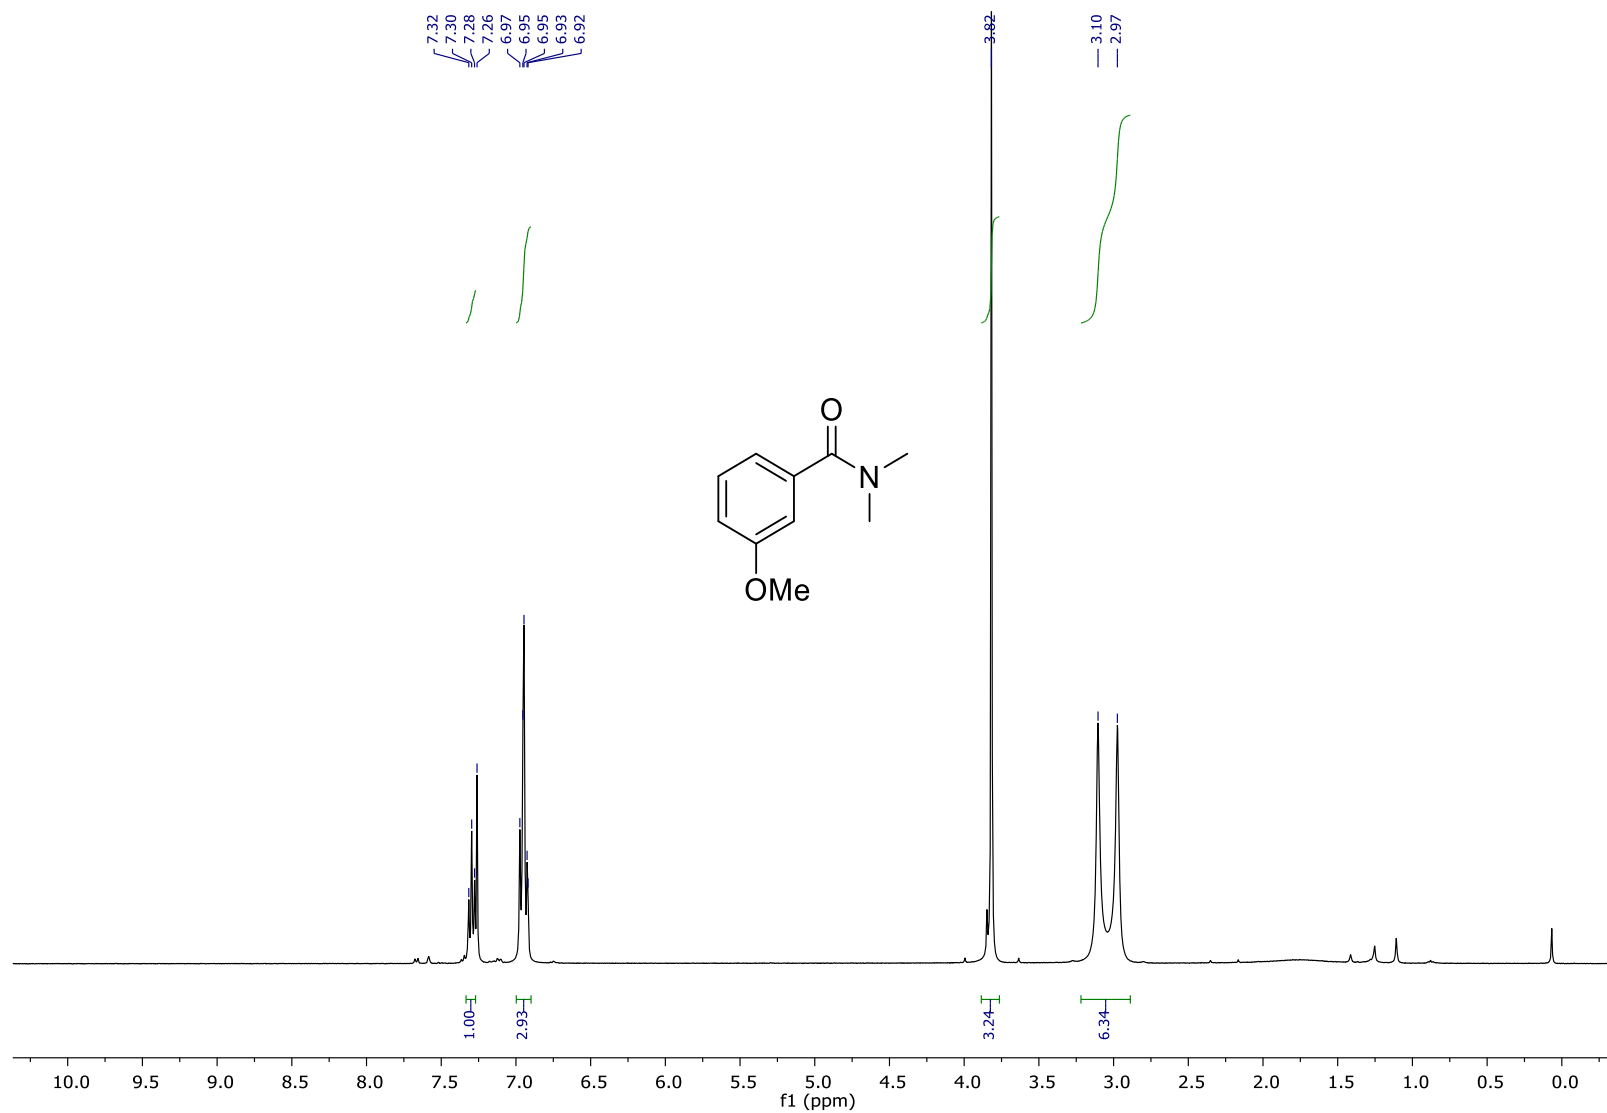

<sup>1</sup>H NMR (CDCl<sub>3</sub>, 400 MHz) spectrum of **11**.

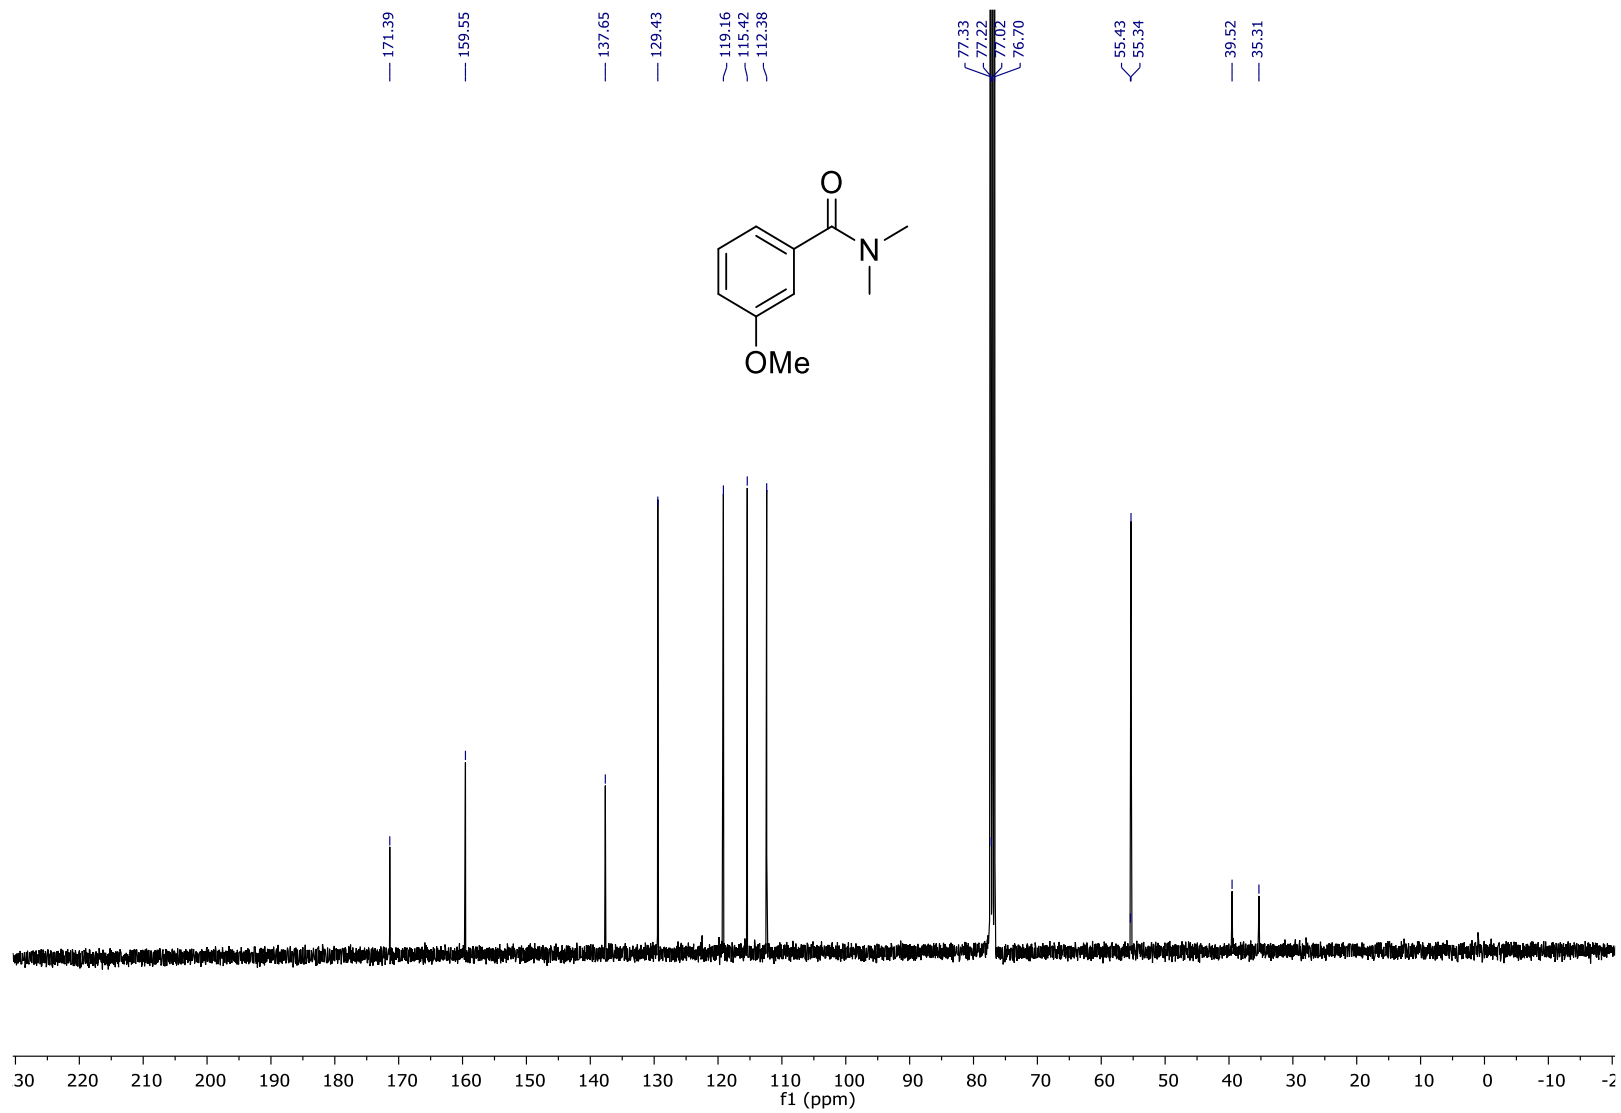

$^{13}\text{C}\{^1\text{H}\}$  NMR (CDCl<sub>3</sub>, 101 MHz) spectrum of 11.

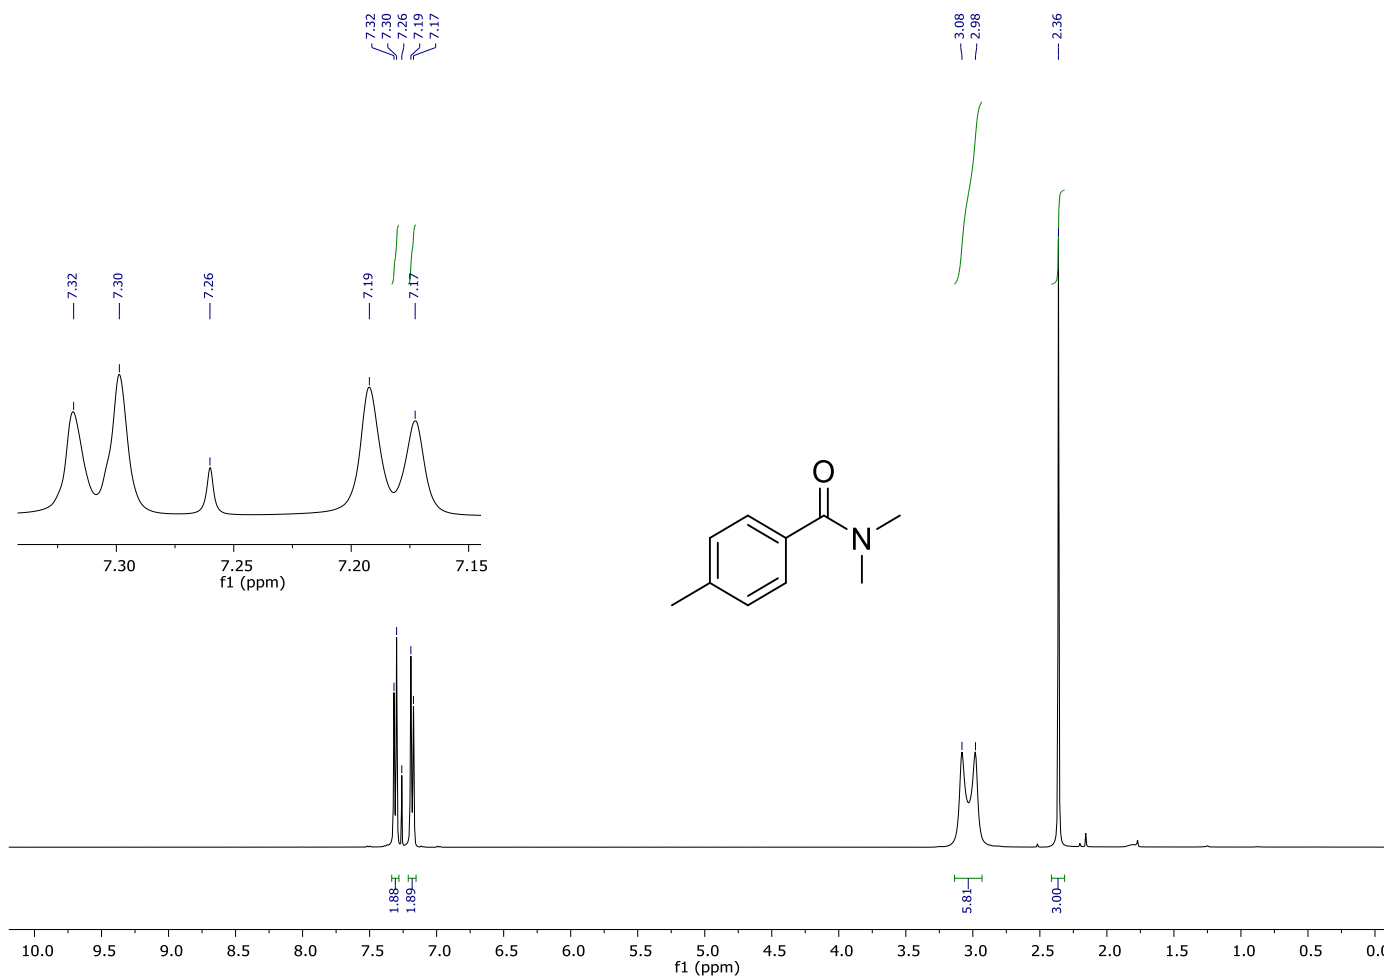

<sup>1</sup>H NMR (CDCl<sub>3</sub>, 400 MHz) spectrum of **1n**.

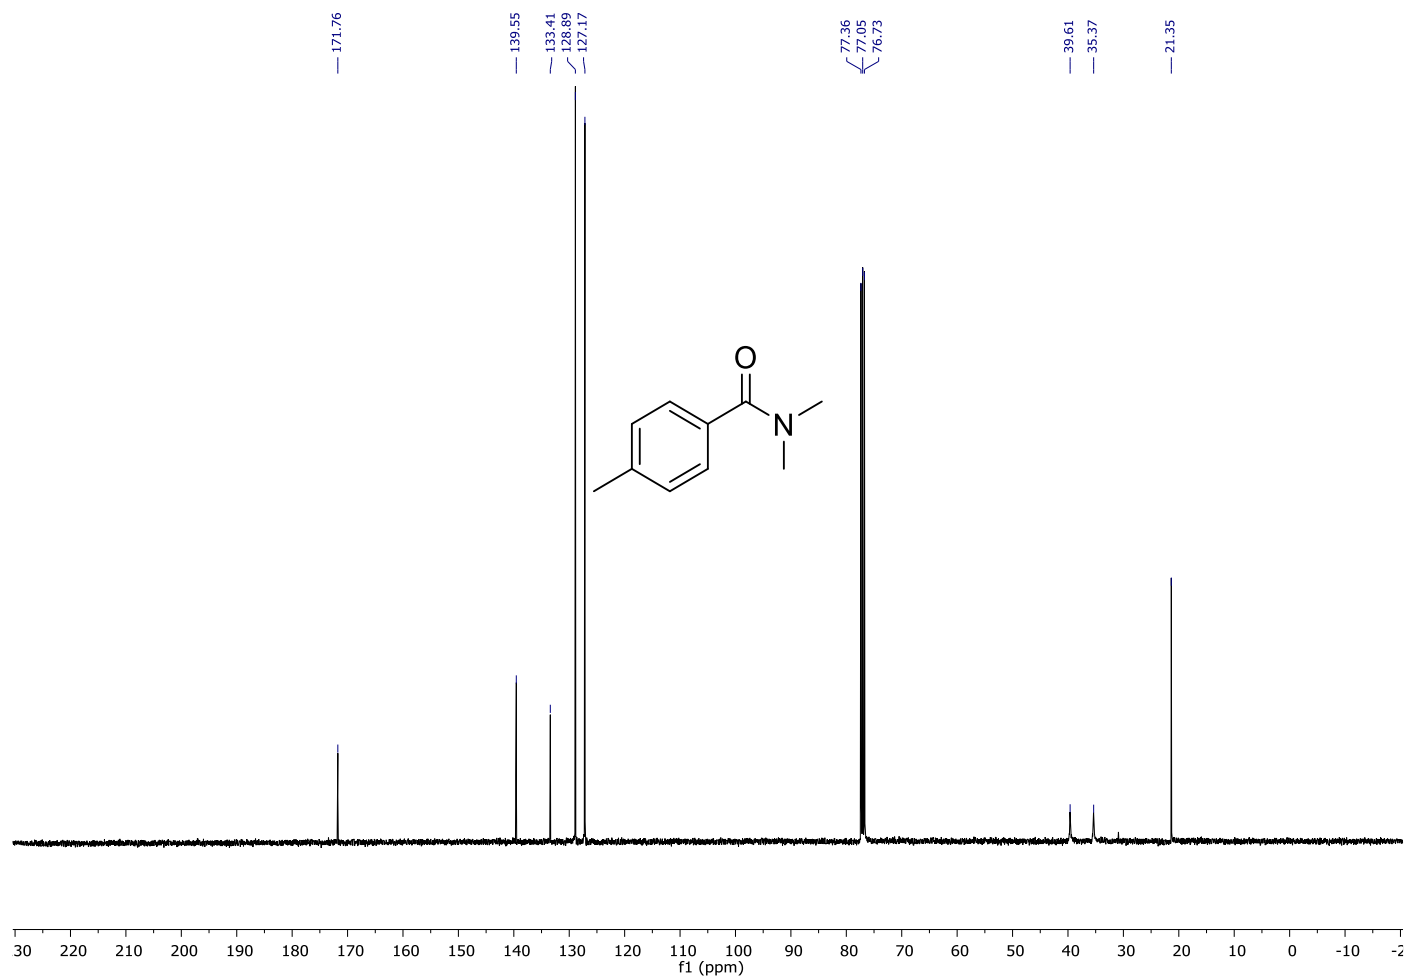

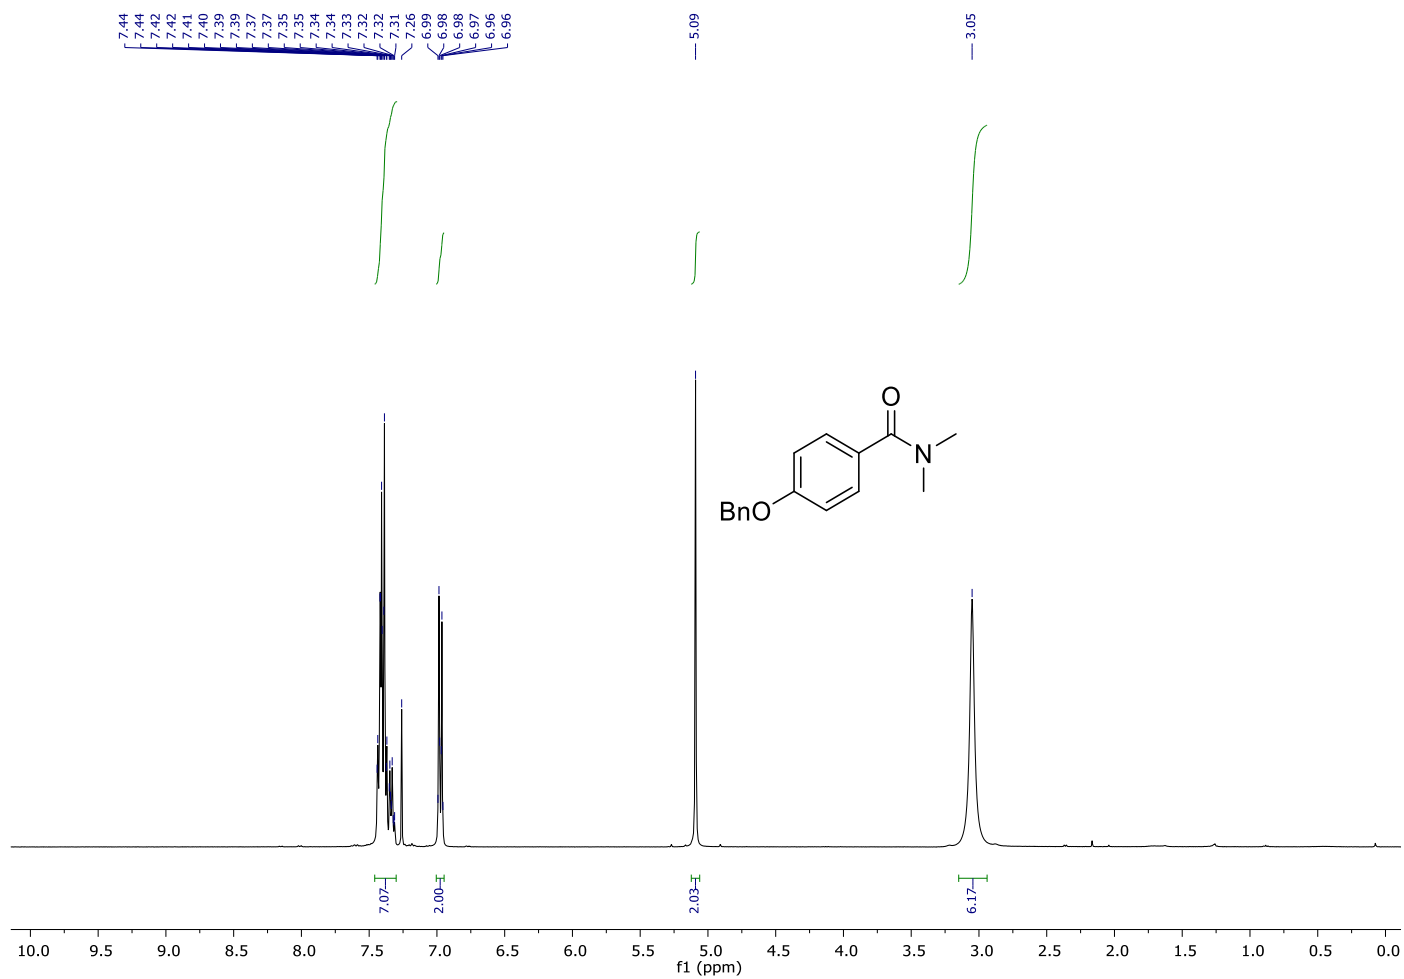

<sup>1</sup>H NMR (CDCl<sub>3</sub>, 400 MHz) spectrum of **1o**.

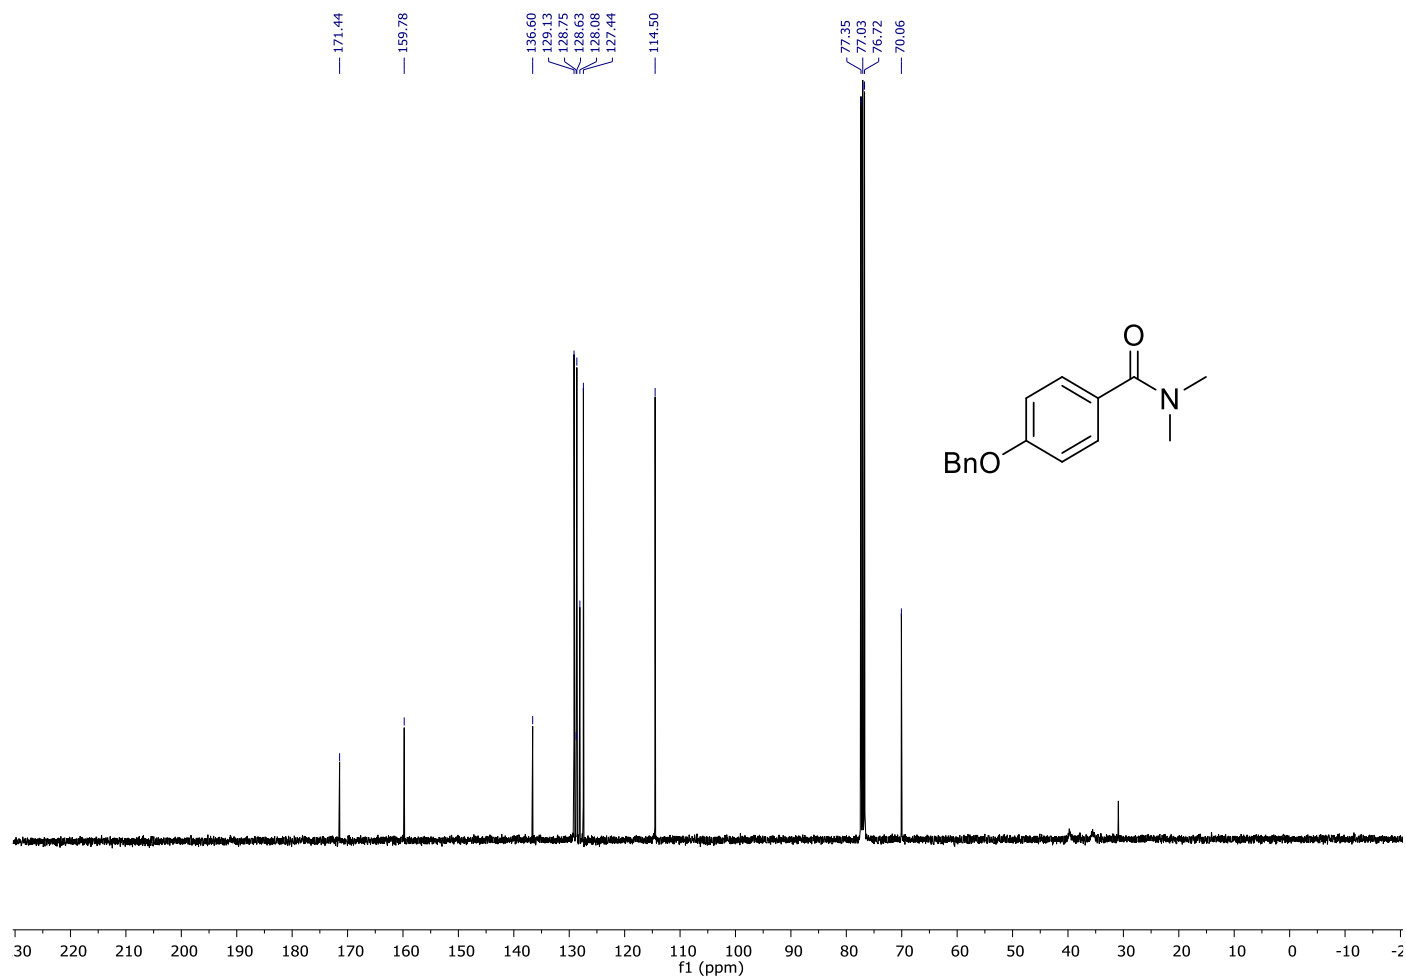

$^{13}\text{C}\{^1\text{H}\}$  NMR ( $\text{CDCl}_3$ , 101 MHz) spectrum of **1o**.

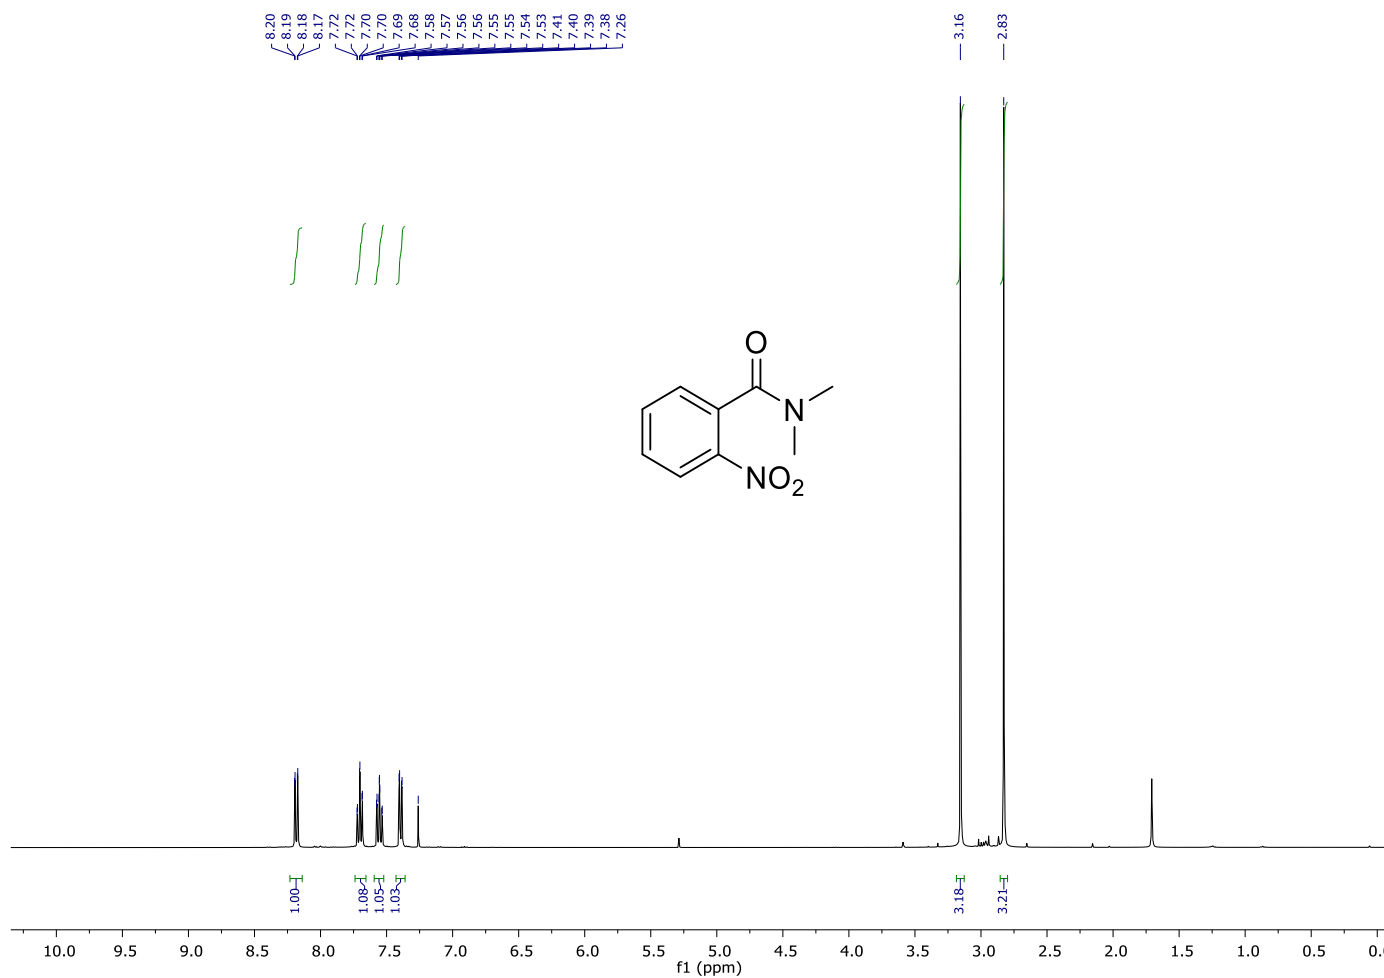

$^1\text{H}$  NMR ( $\text{CDCl}_3$ , 400 MHz) spectrum of **1p**.

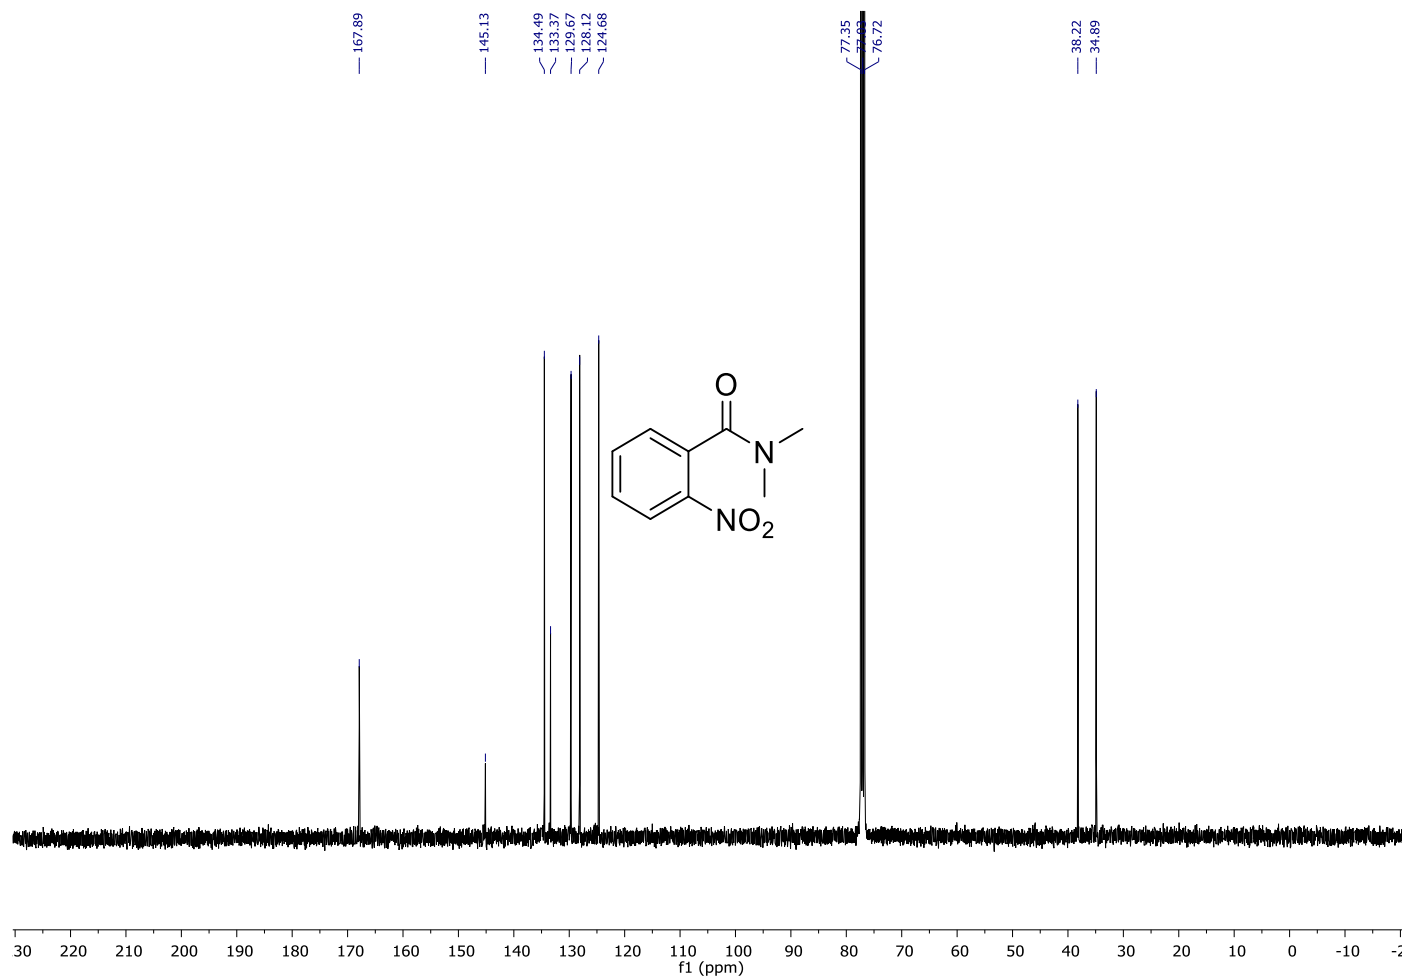

$^{13}\text{C}\{^1\text{H}\}$  NMR ( $\text{CDCl}_3$ , 101 MHz) spectrum of **1p**.

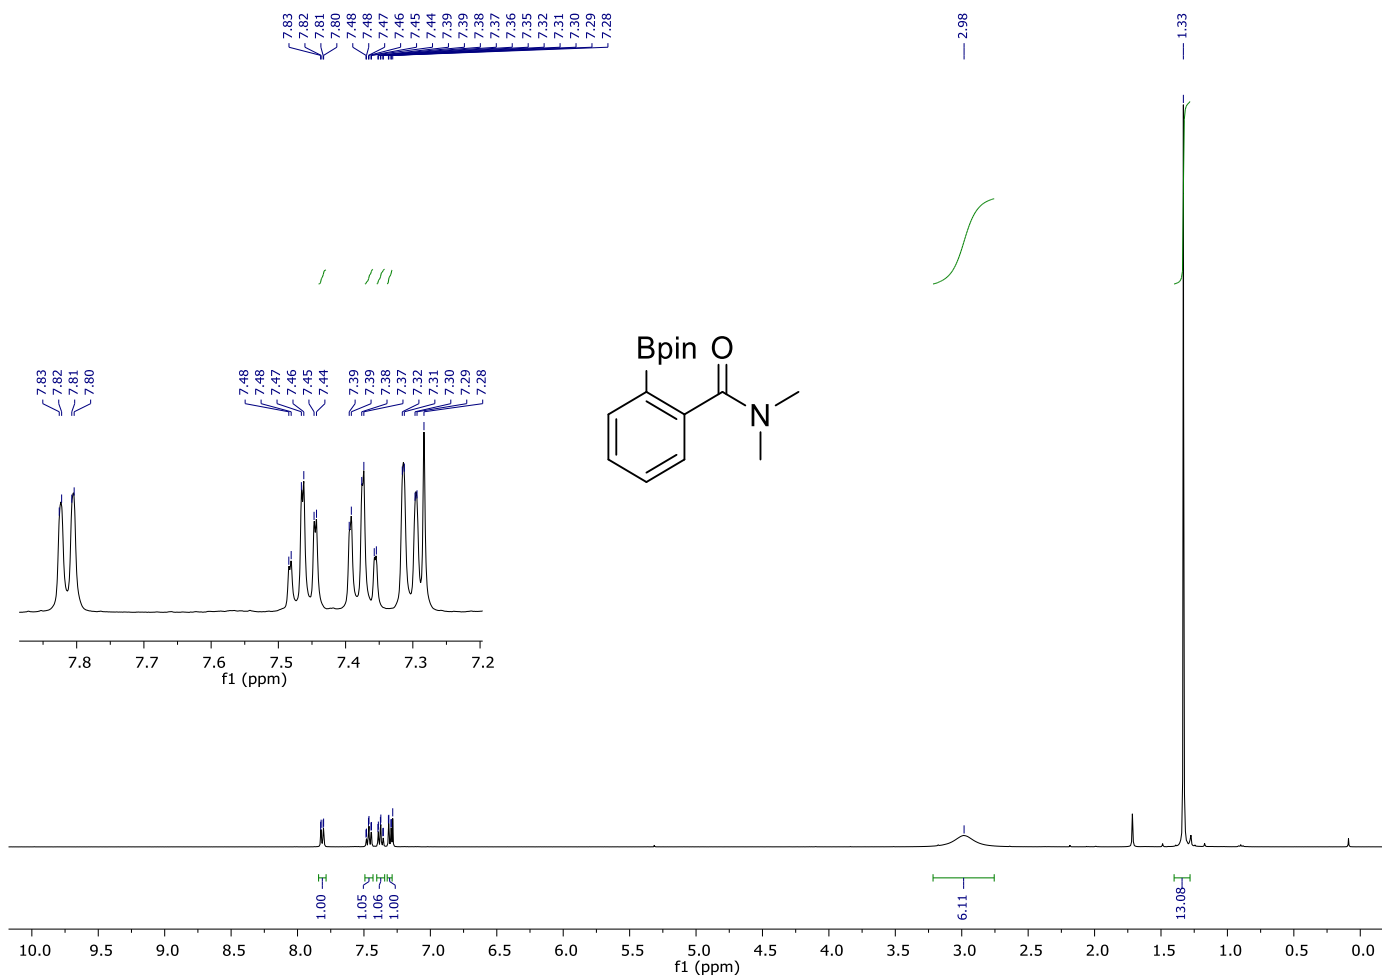

<sup>1</sup>H NMR (CDCl<sub>3</sub>, 400 MHz) spectrum of **2a**.

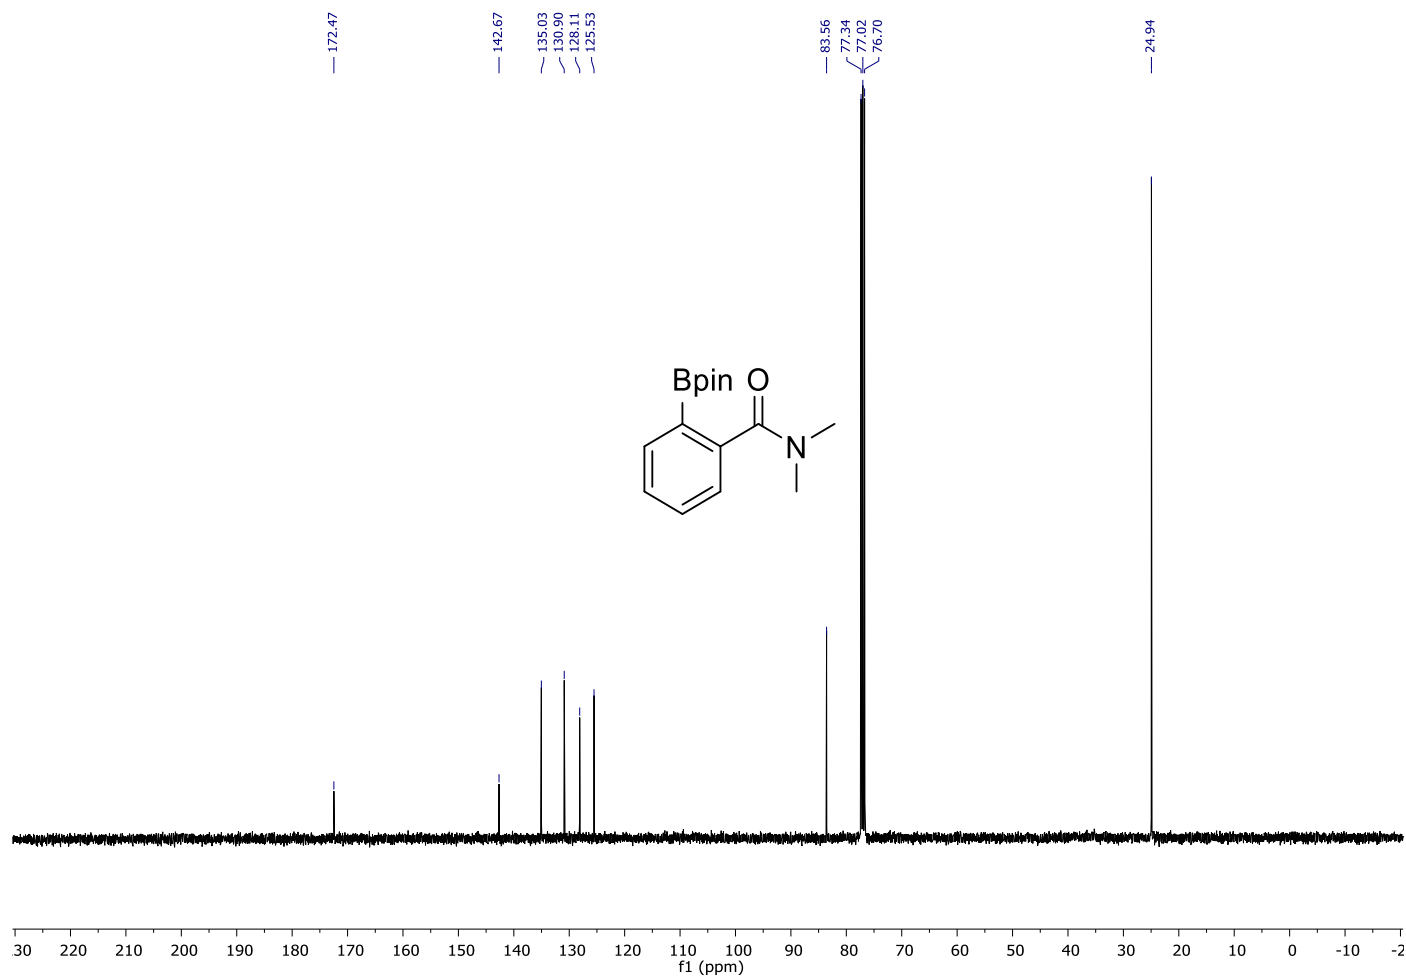

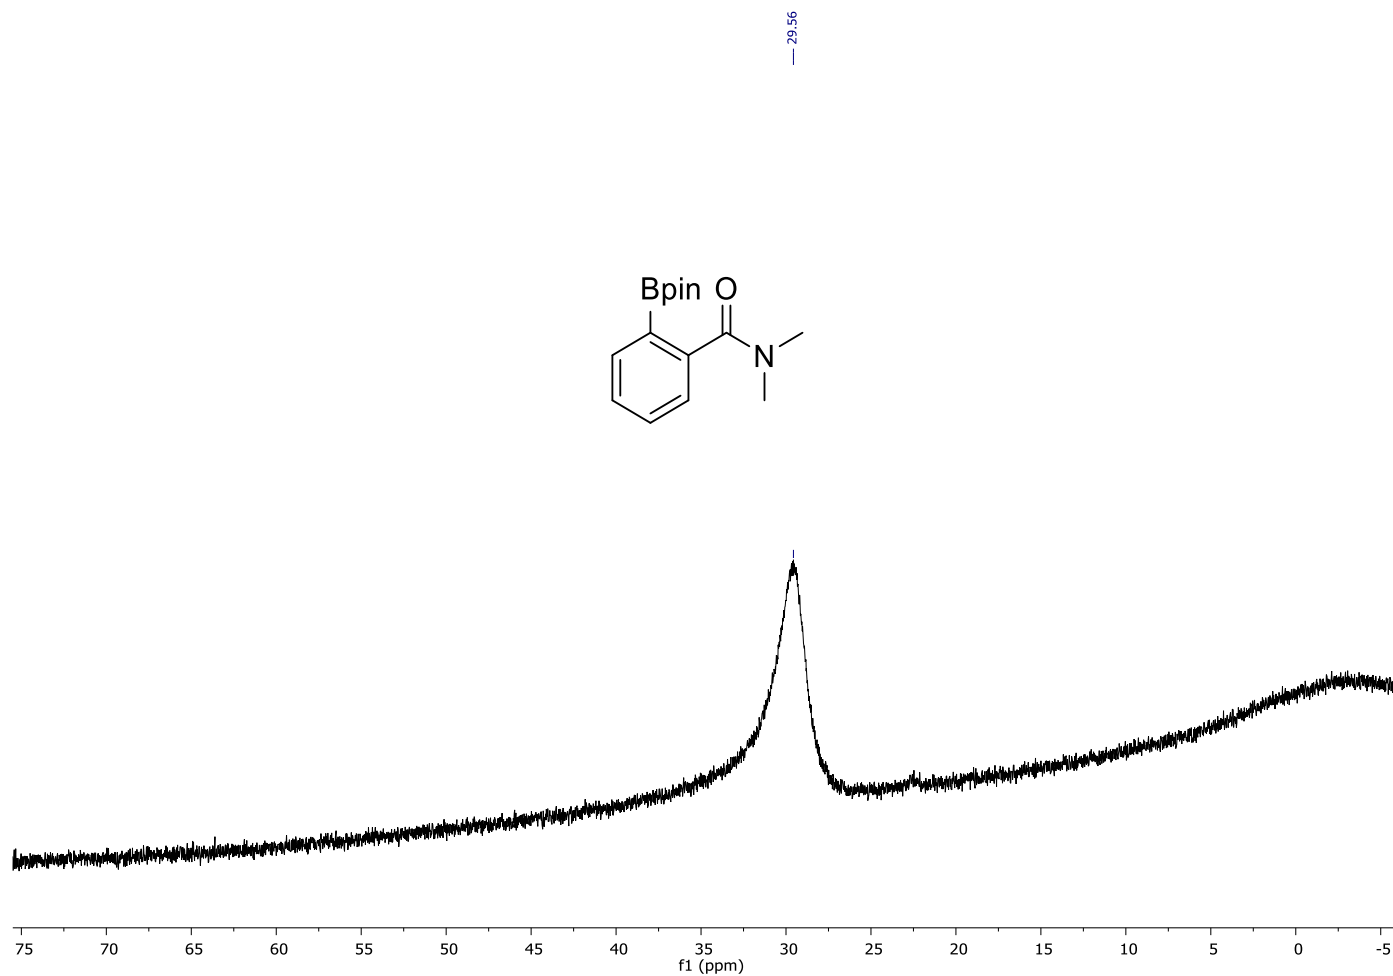

$^{11}\text{B}\{^1\text{H}\}$  NMR ( $\text{CDCl}_3$ , 128 MHz) spectrum spectrum of **2a**.

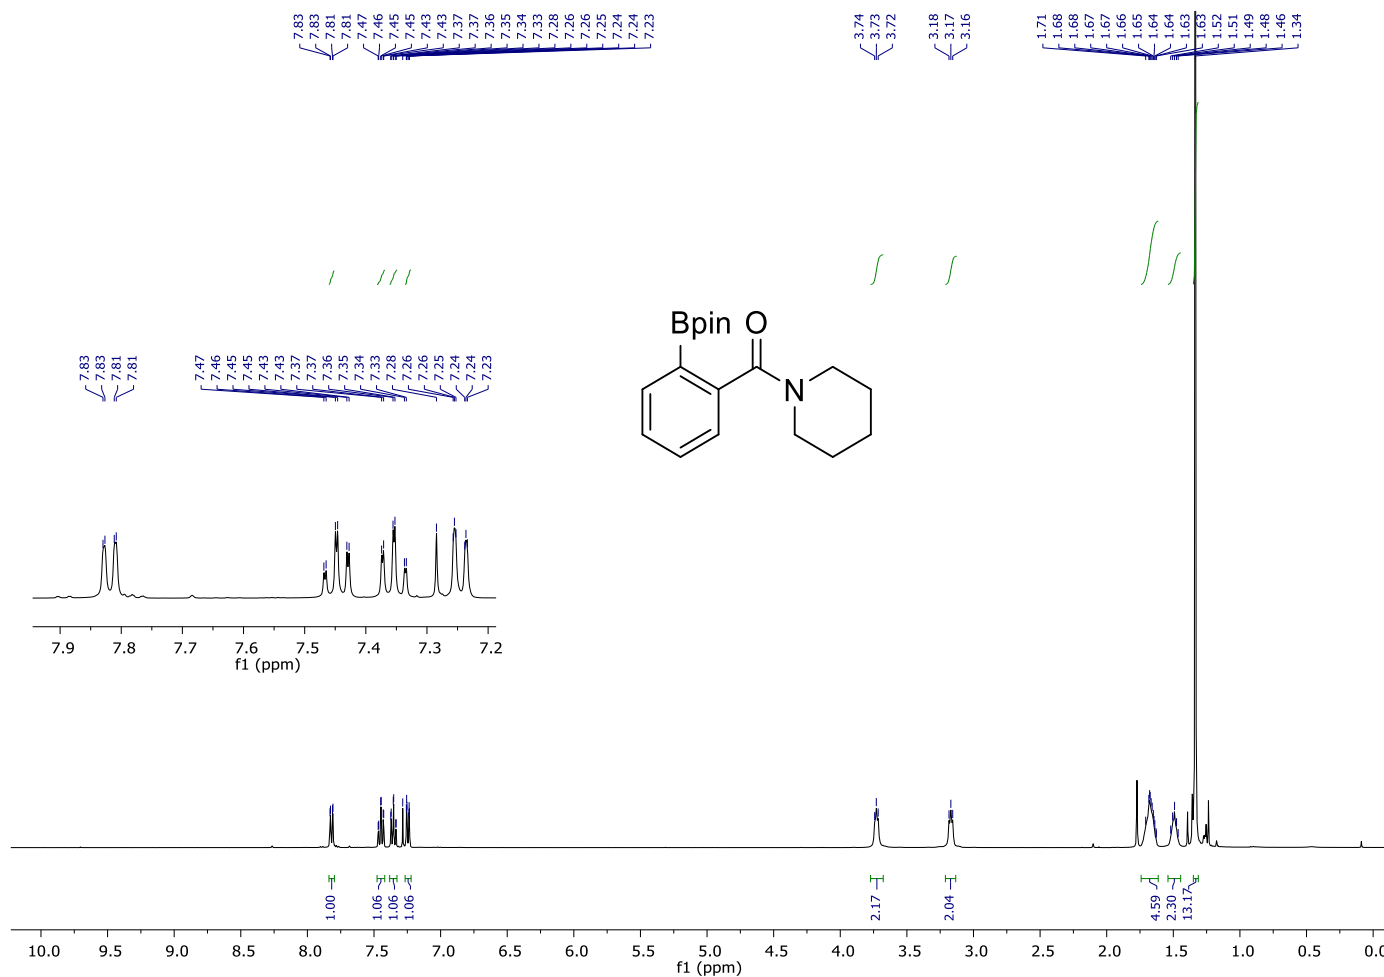

<sup>1</sup>H NMR (CDCl<sub>3</sub>, 400 MHz) spectrum of **2b**.

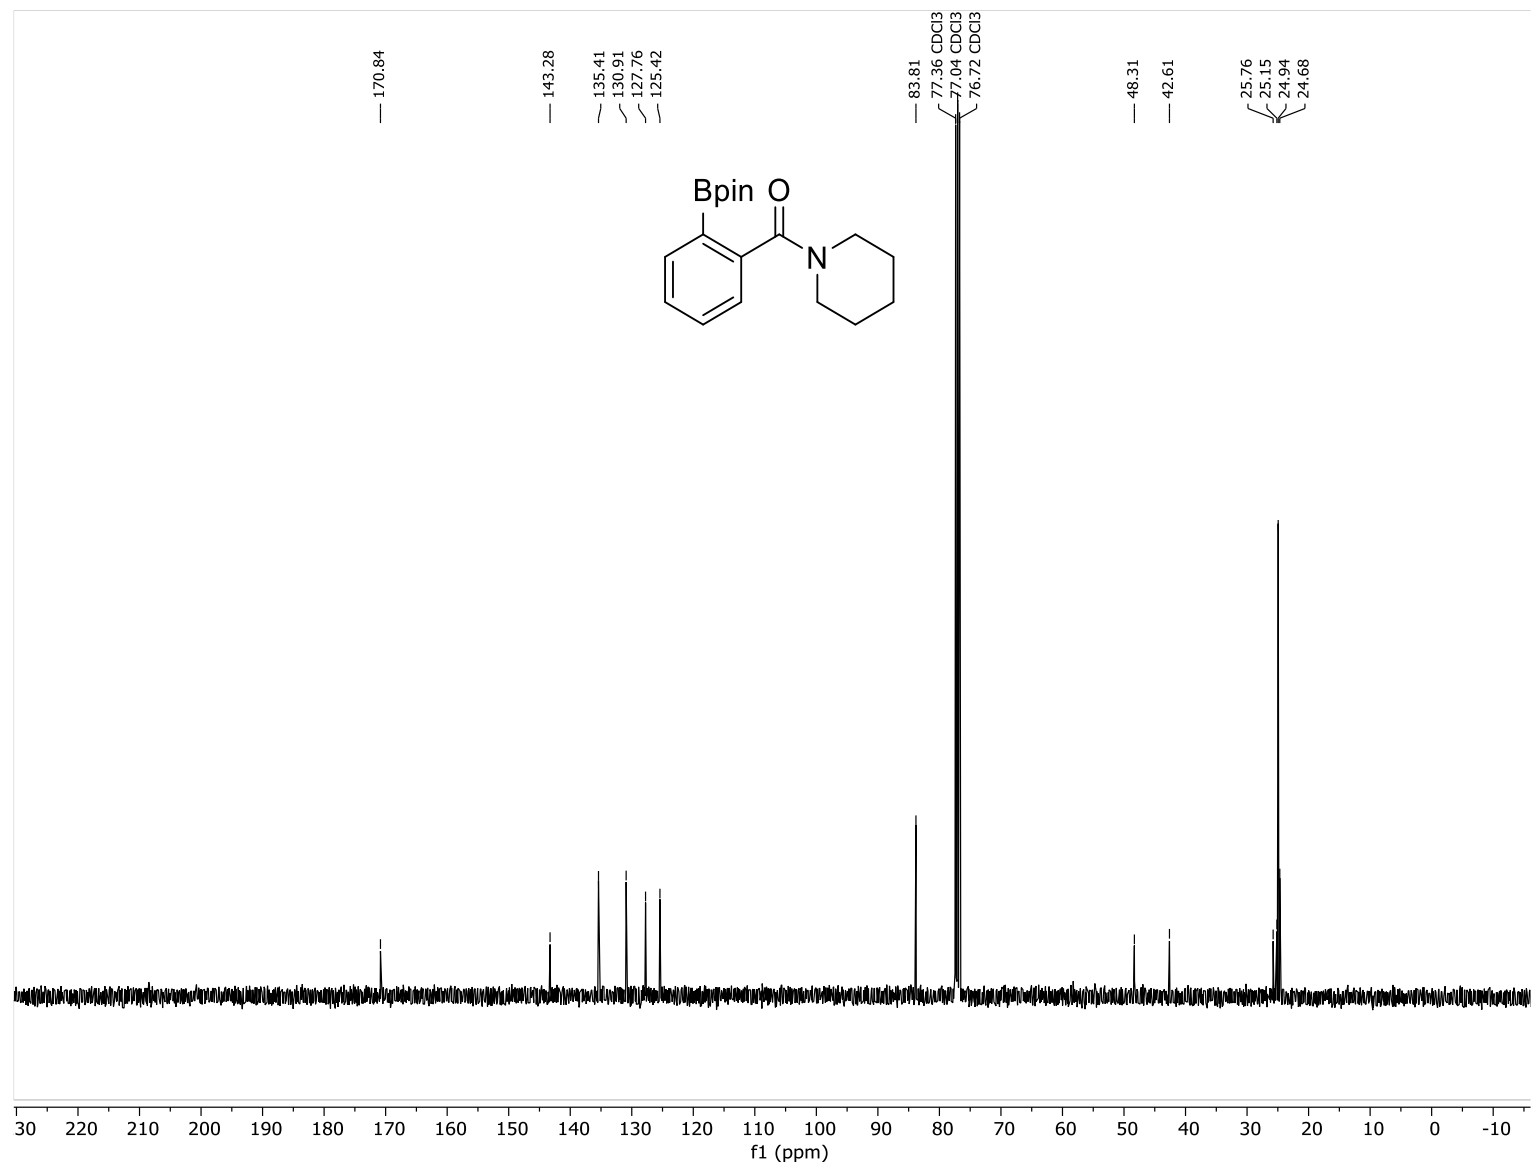

$^{13}\text{C}\{^1\text{H}\}$  NMR (CDCl<sub>3</sub>, 101 MHz) spectrum of **2b**.

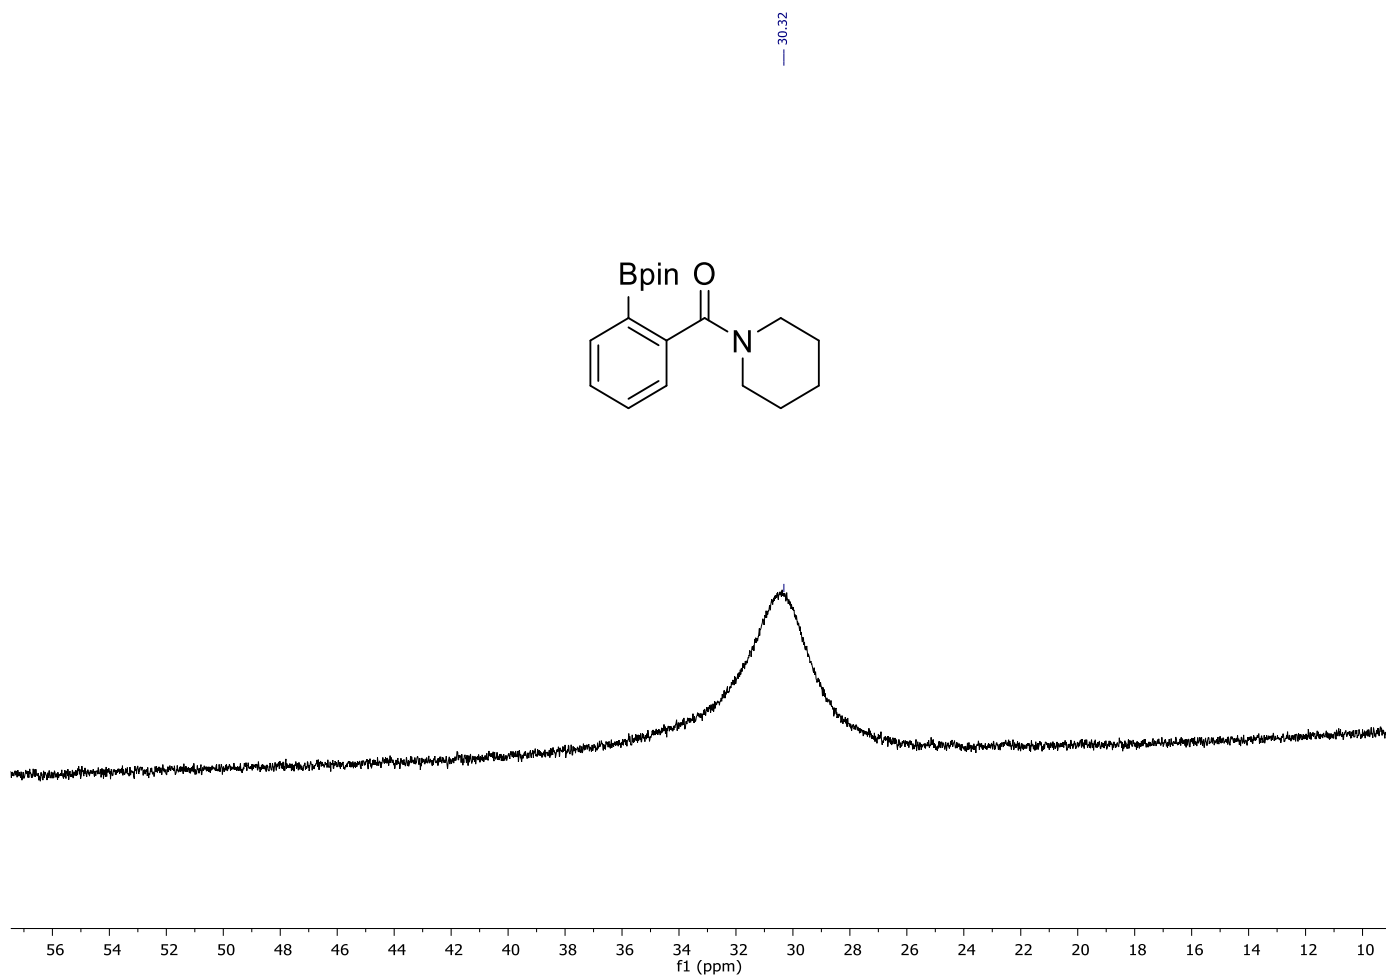

$^{11}\text{B}\{^1\text{H}\}$  NMR ( $\text{CDCl}_3$ , 128 MHz) spectrum spectrum of **2b**.

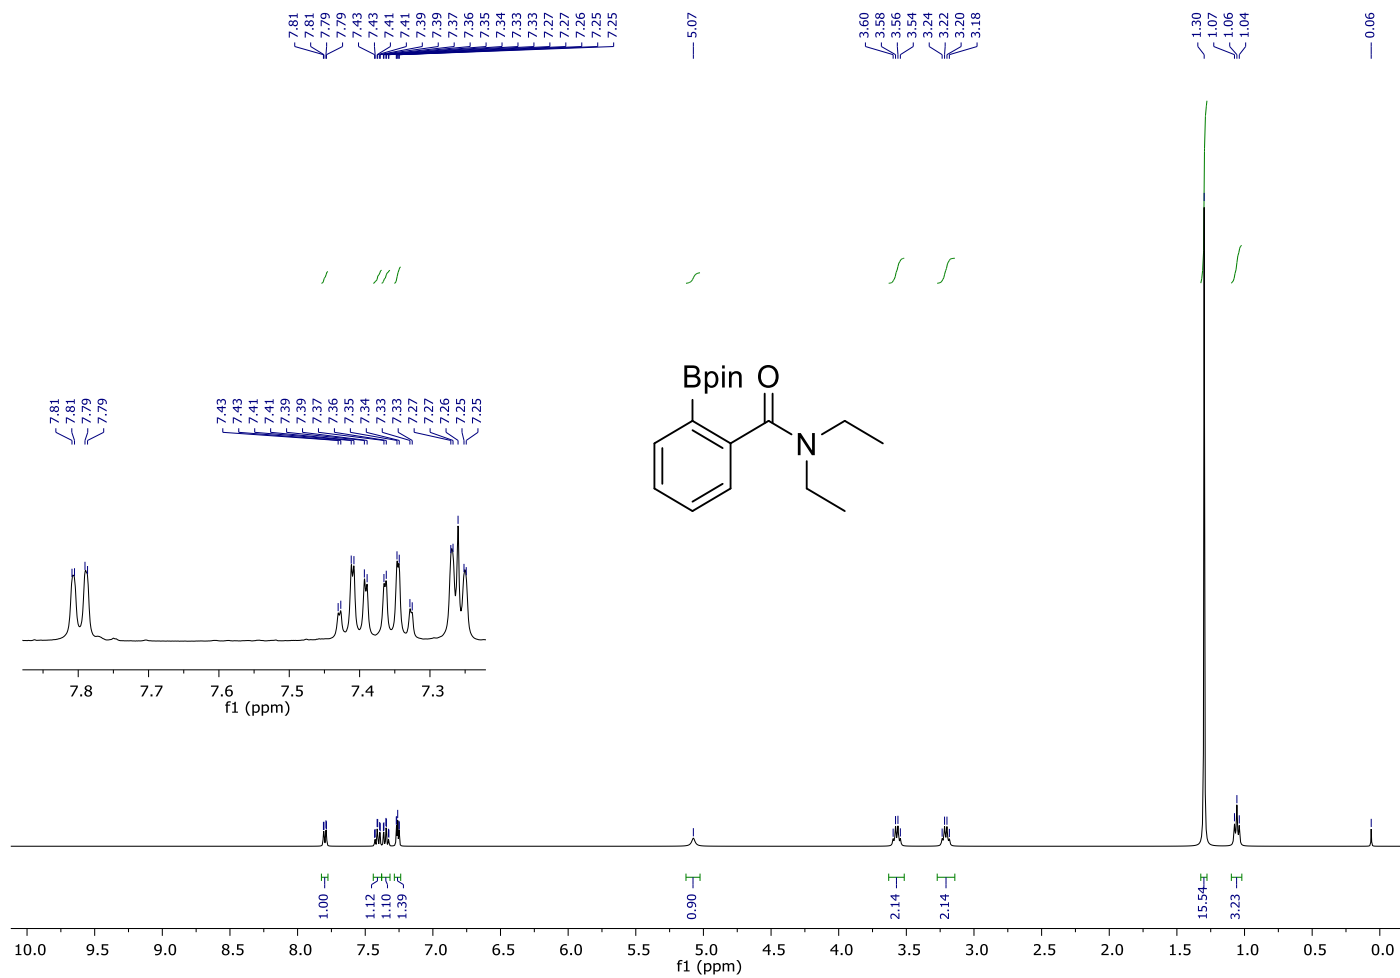

<sup>1</sup>H NMR (CDCl<sub>3</sub>, 400 MHz) spectrum of **2c**.

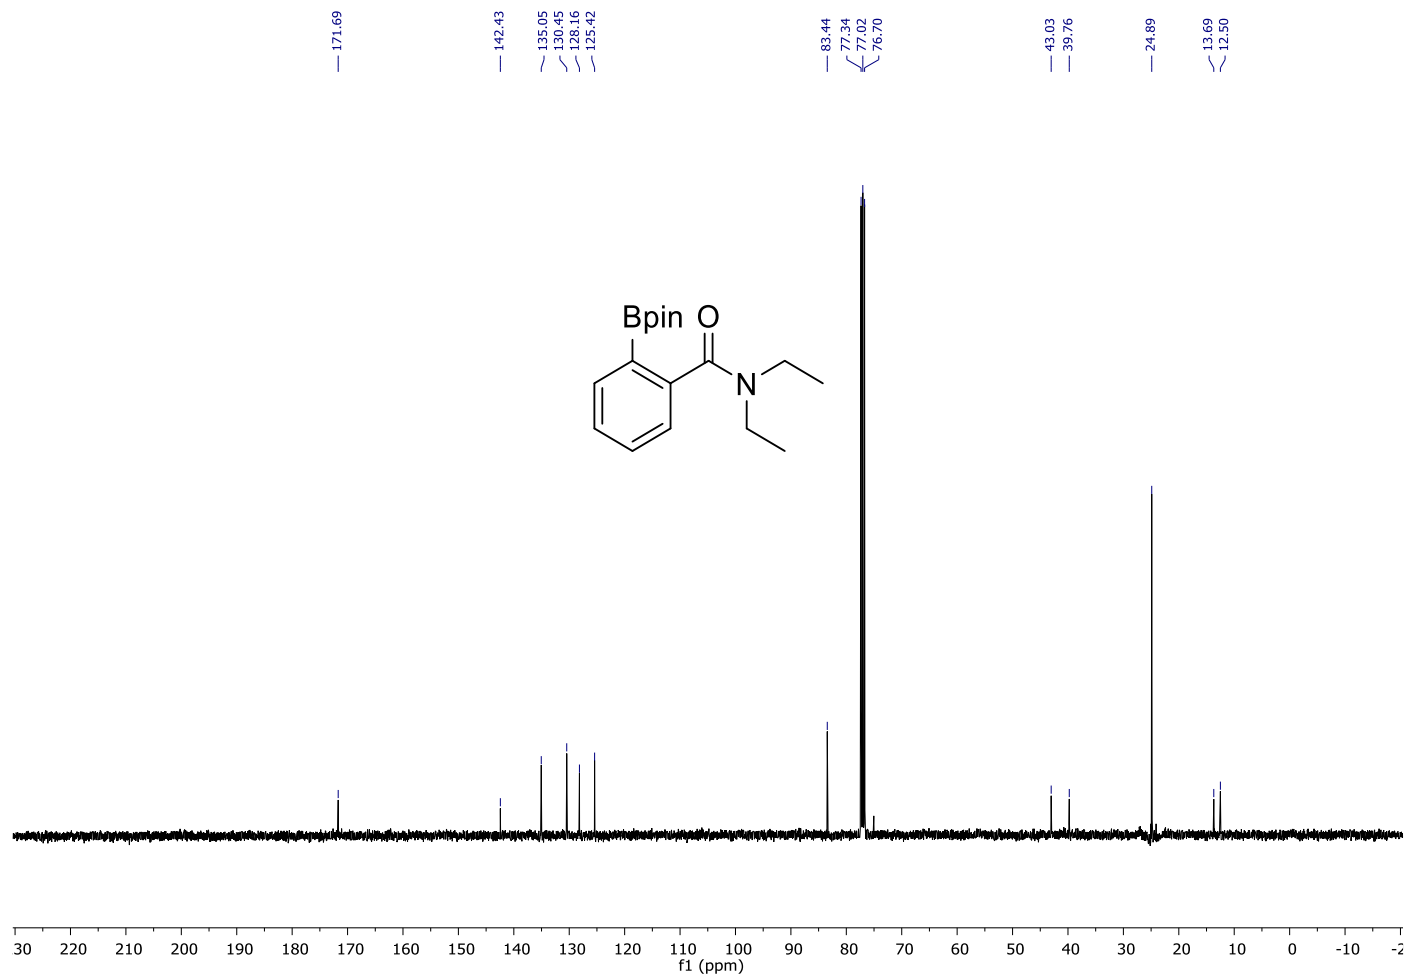

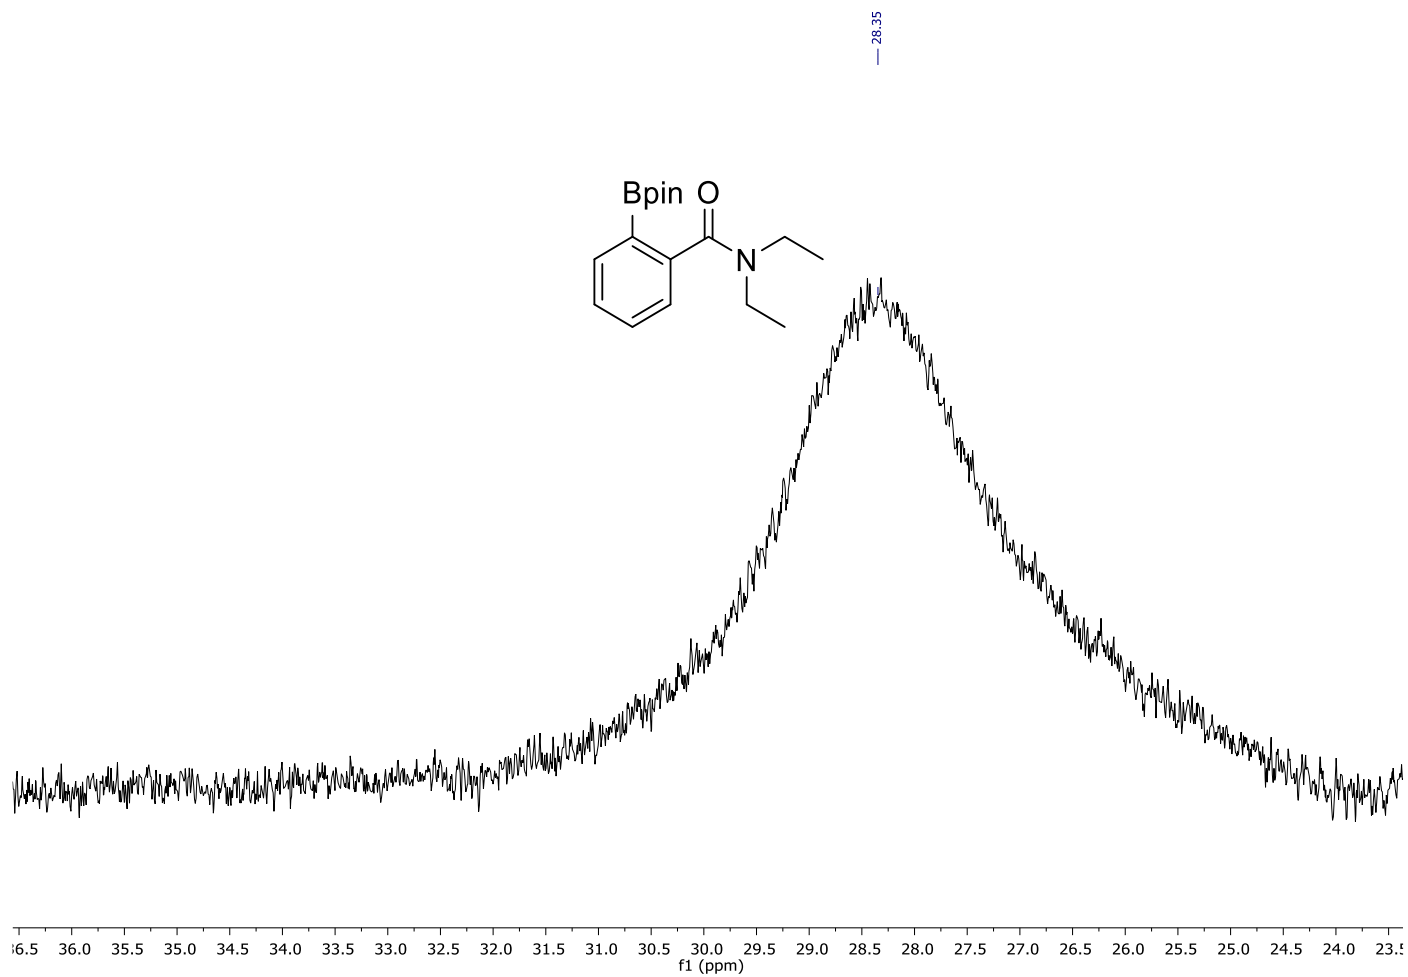

$^{11}\text{B}\{^1\text{H}\}$  NMR ( $\text{CDCl}_3$ , 128 MHz) spectrum spectrum of **2c**.

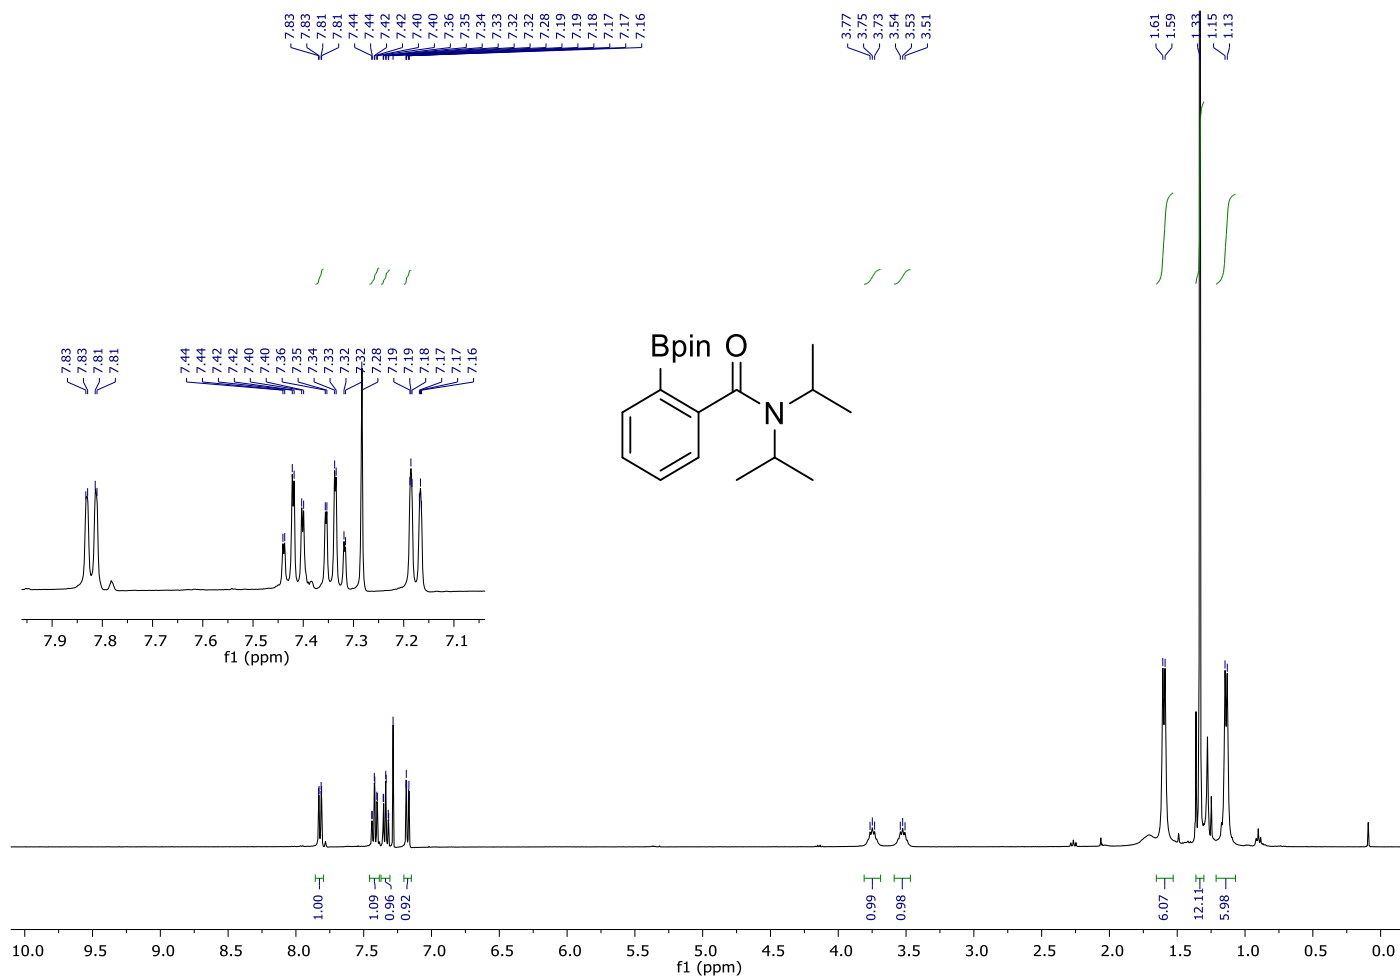

<sup>1</sup>H NMR (CDCl<sub>3</sub>, 400 MHz) spectrum of **2d**.

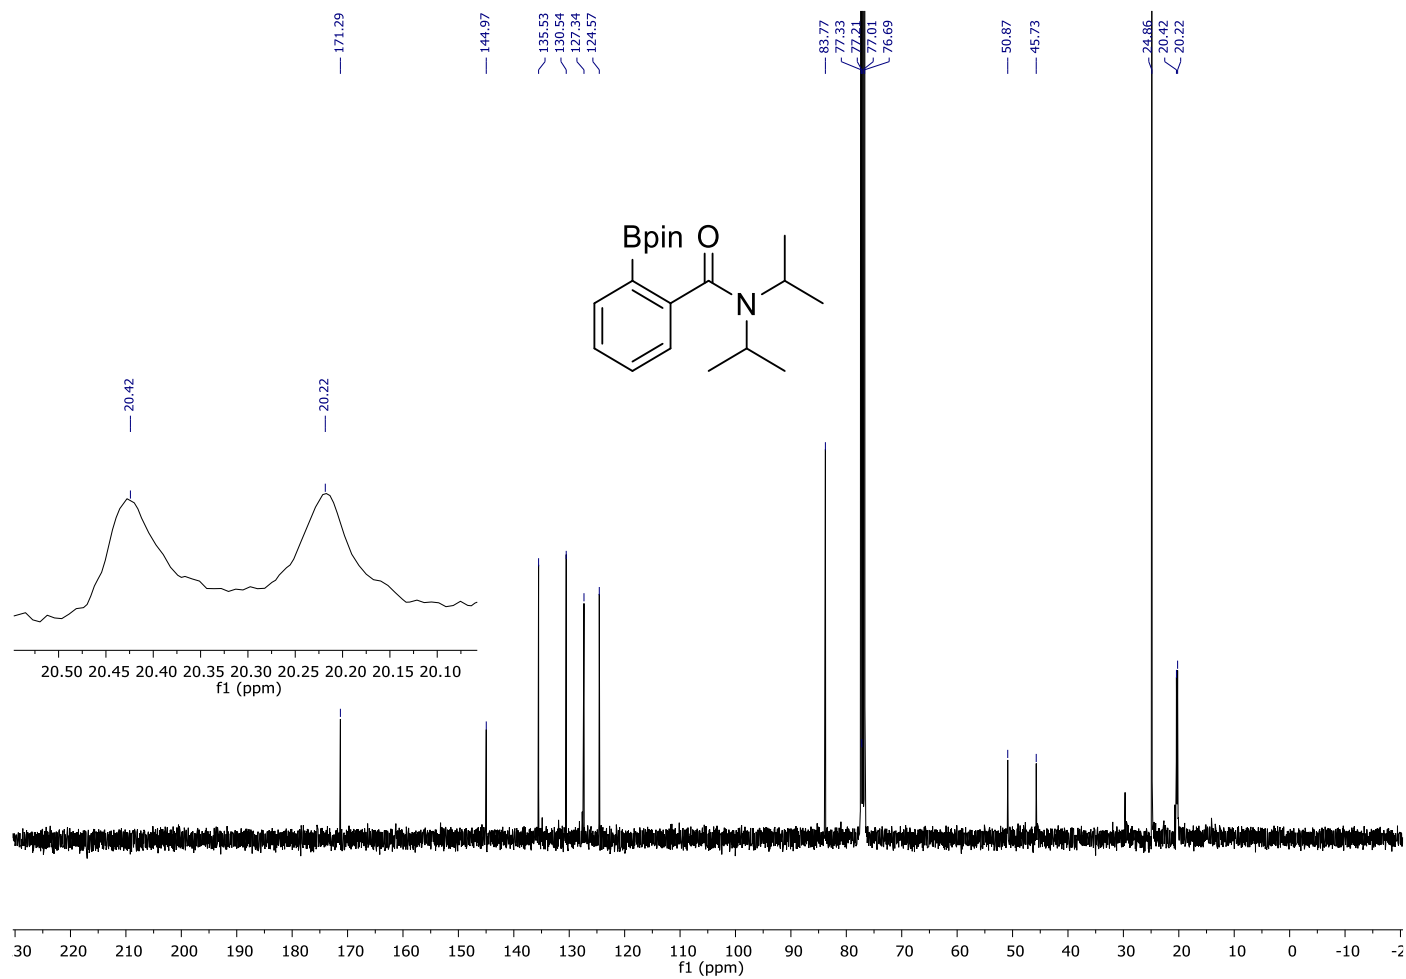

$^{13}\text{C}\{^1\text{H}\}$  NMR ( $\text{CDCl}_3$ , 101 MHz) spectrum of **2d**.

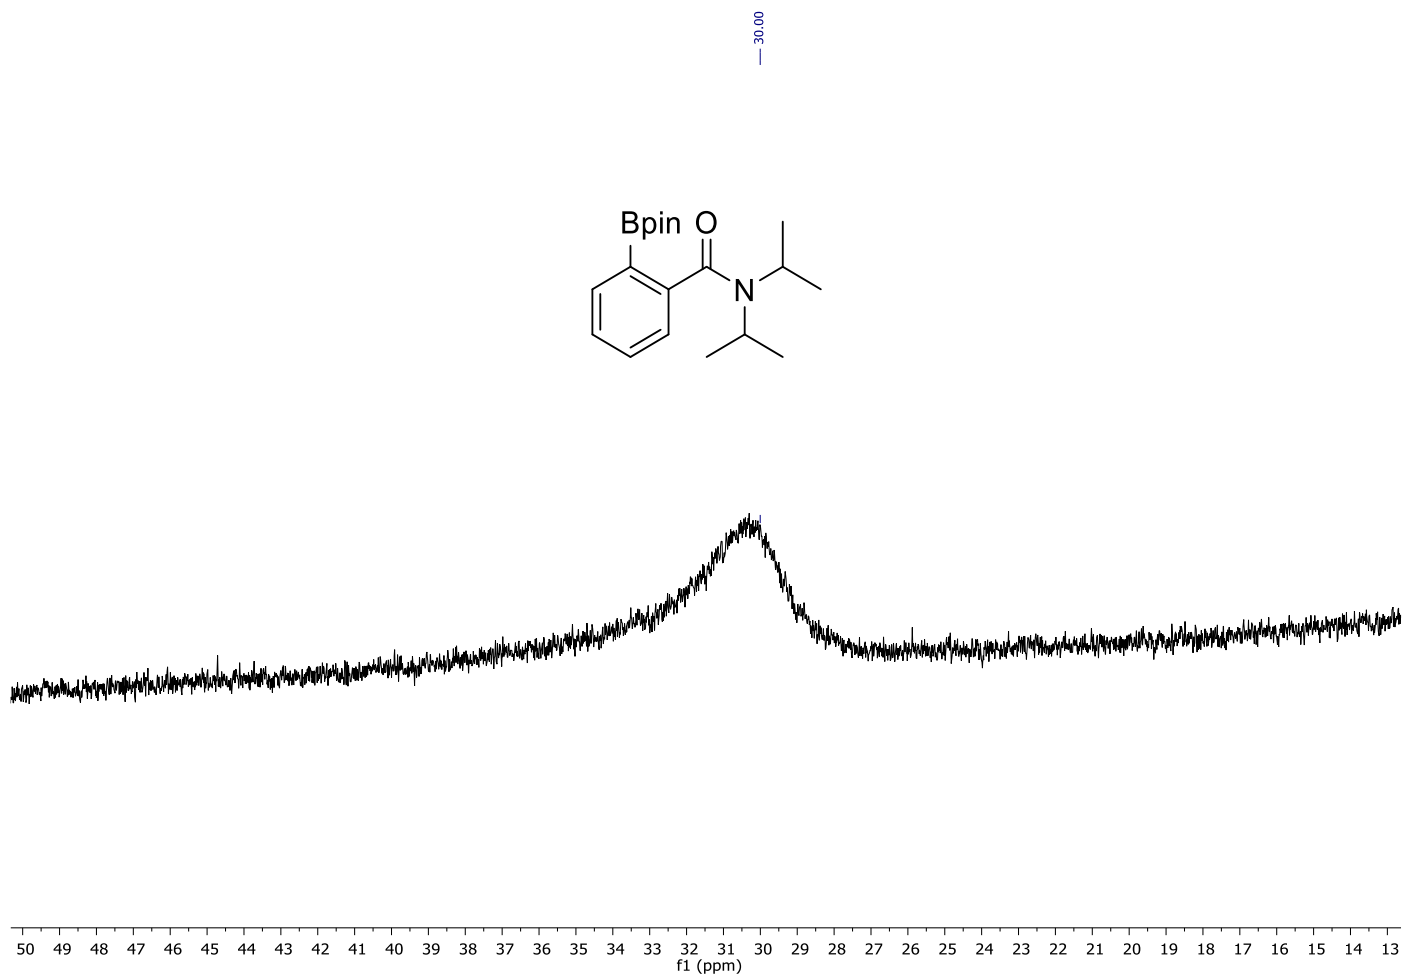

$^{11}\text{B}\{^1\text{H}\}$  NMR ( $\text{CDCl}_3$ , 128 MHz) spectrum spectrum of **2d**.

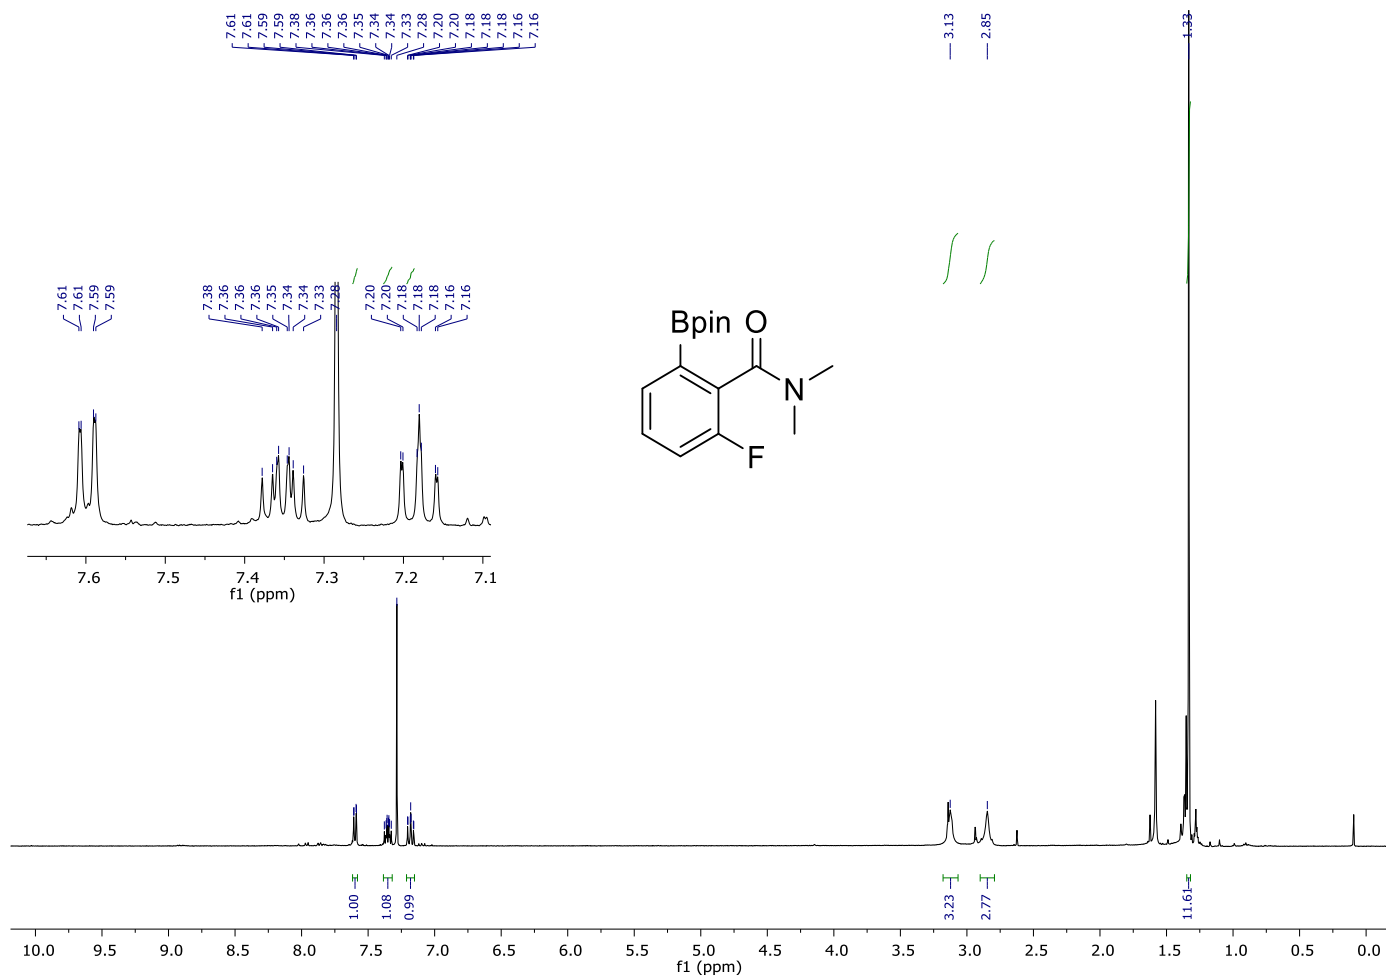

<sup>1</sup>H NMR (CDCl<sub>3</sub>, 400 MHz) spectrum of **2f**.

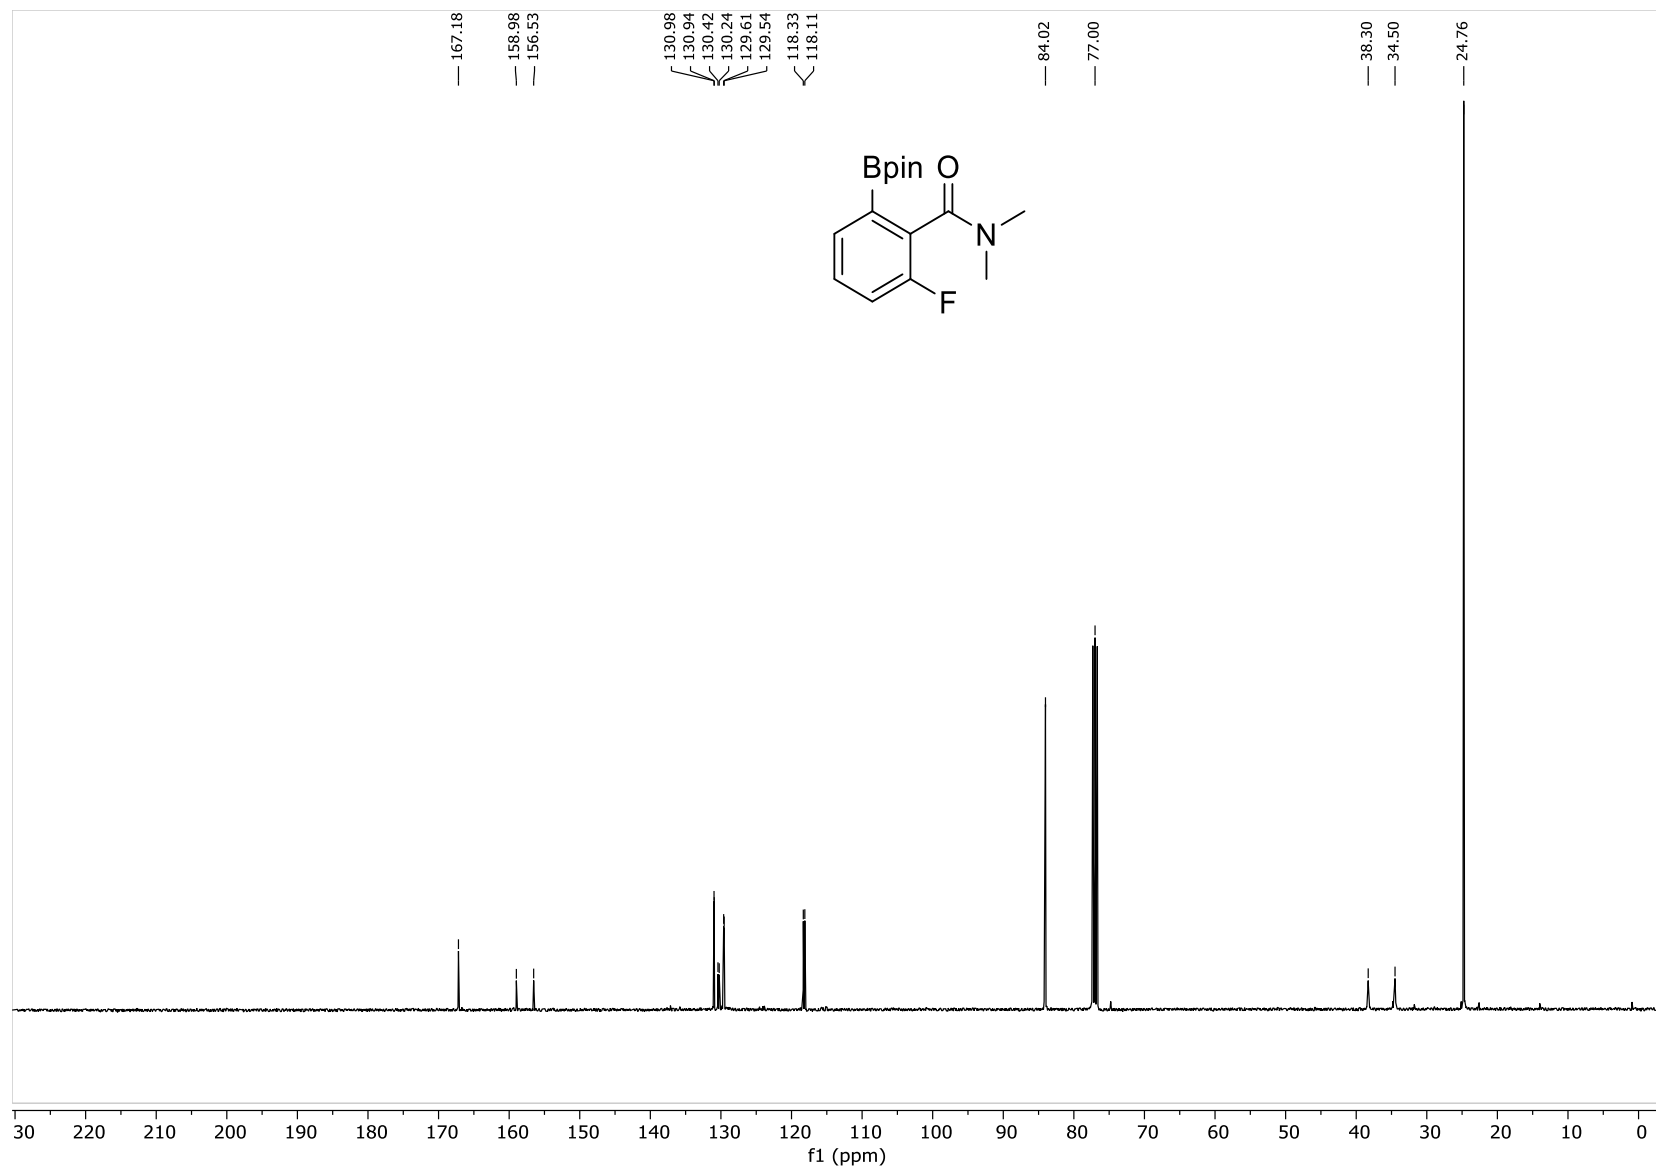

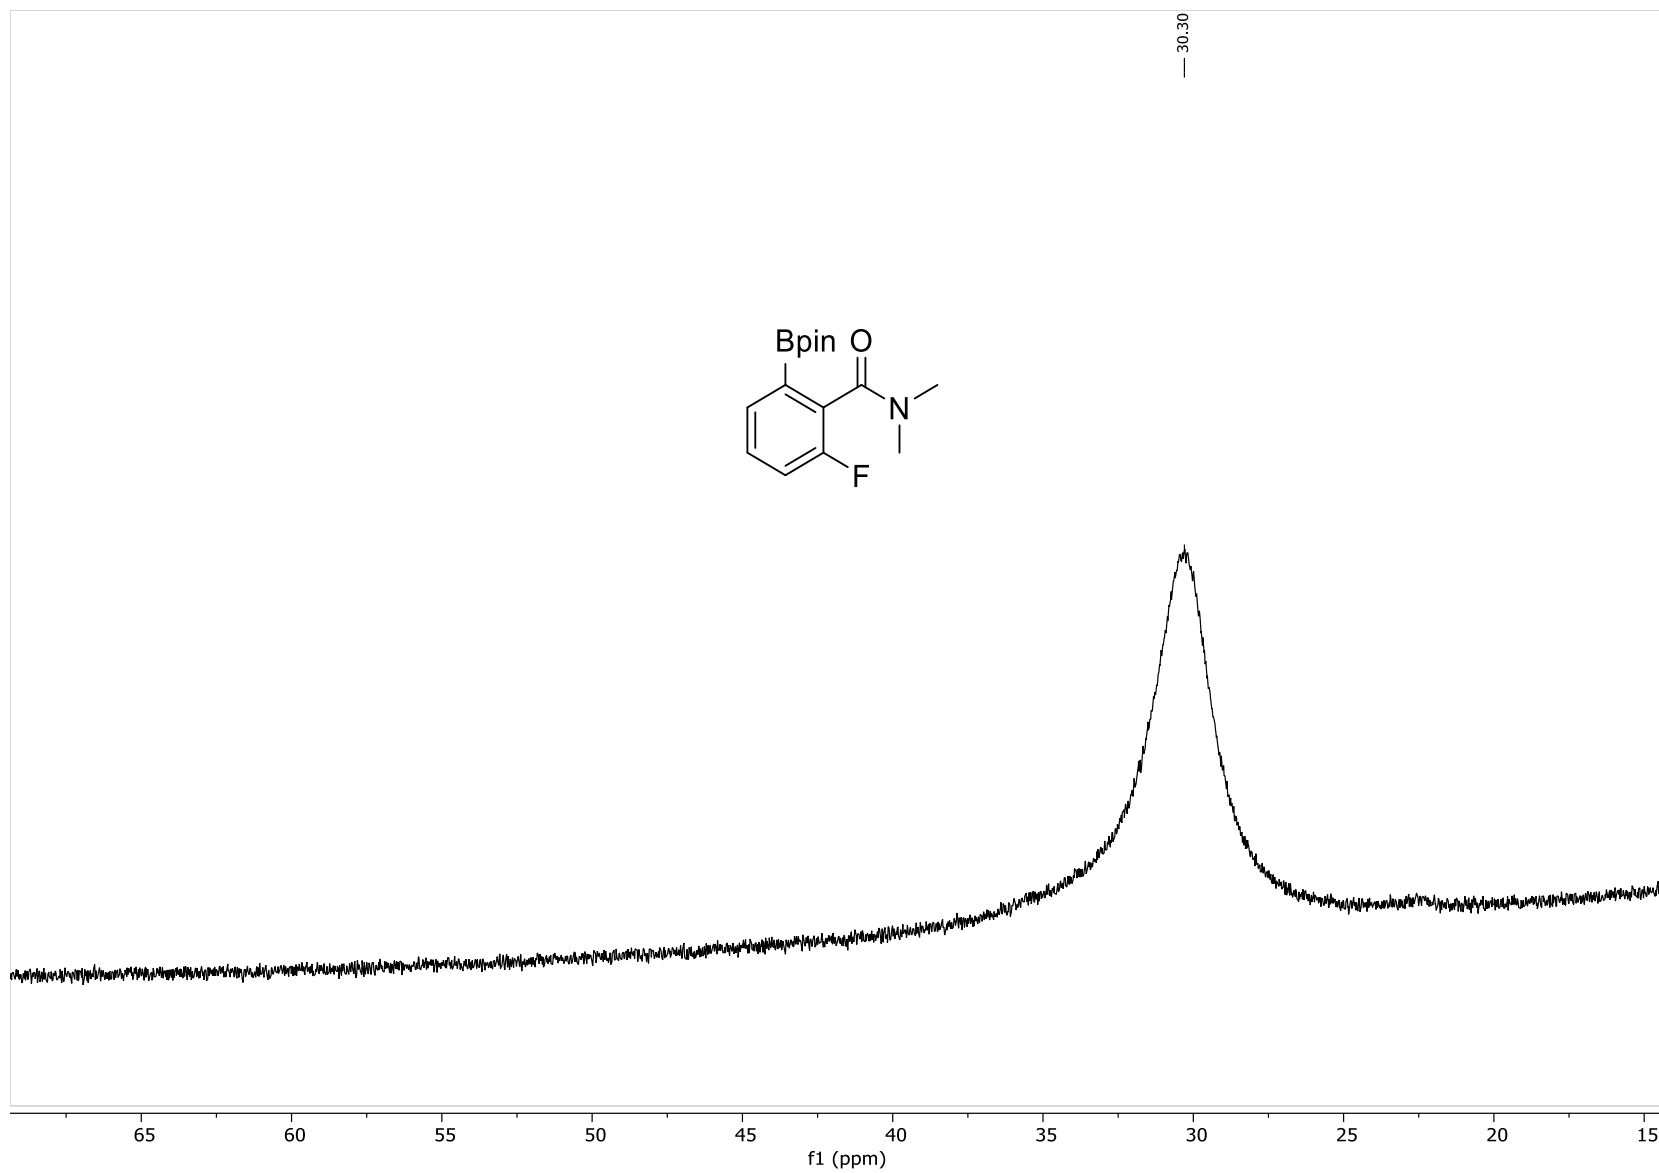

$^{11}\text{B}\{^1\text{H}\}$  NMR ( $\text{CDCl}_3$ , 128 MHz) spectrum spectrum of **2f**.

**S-144**

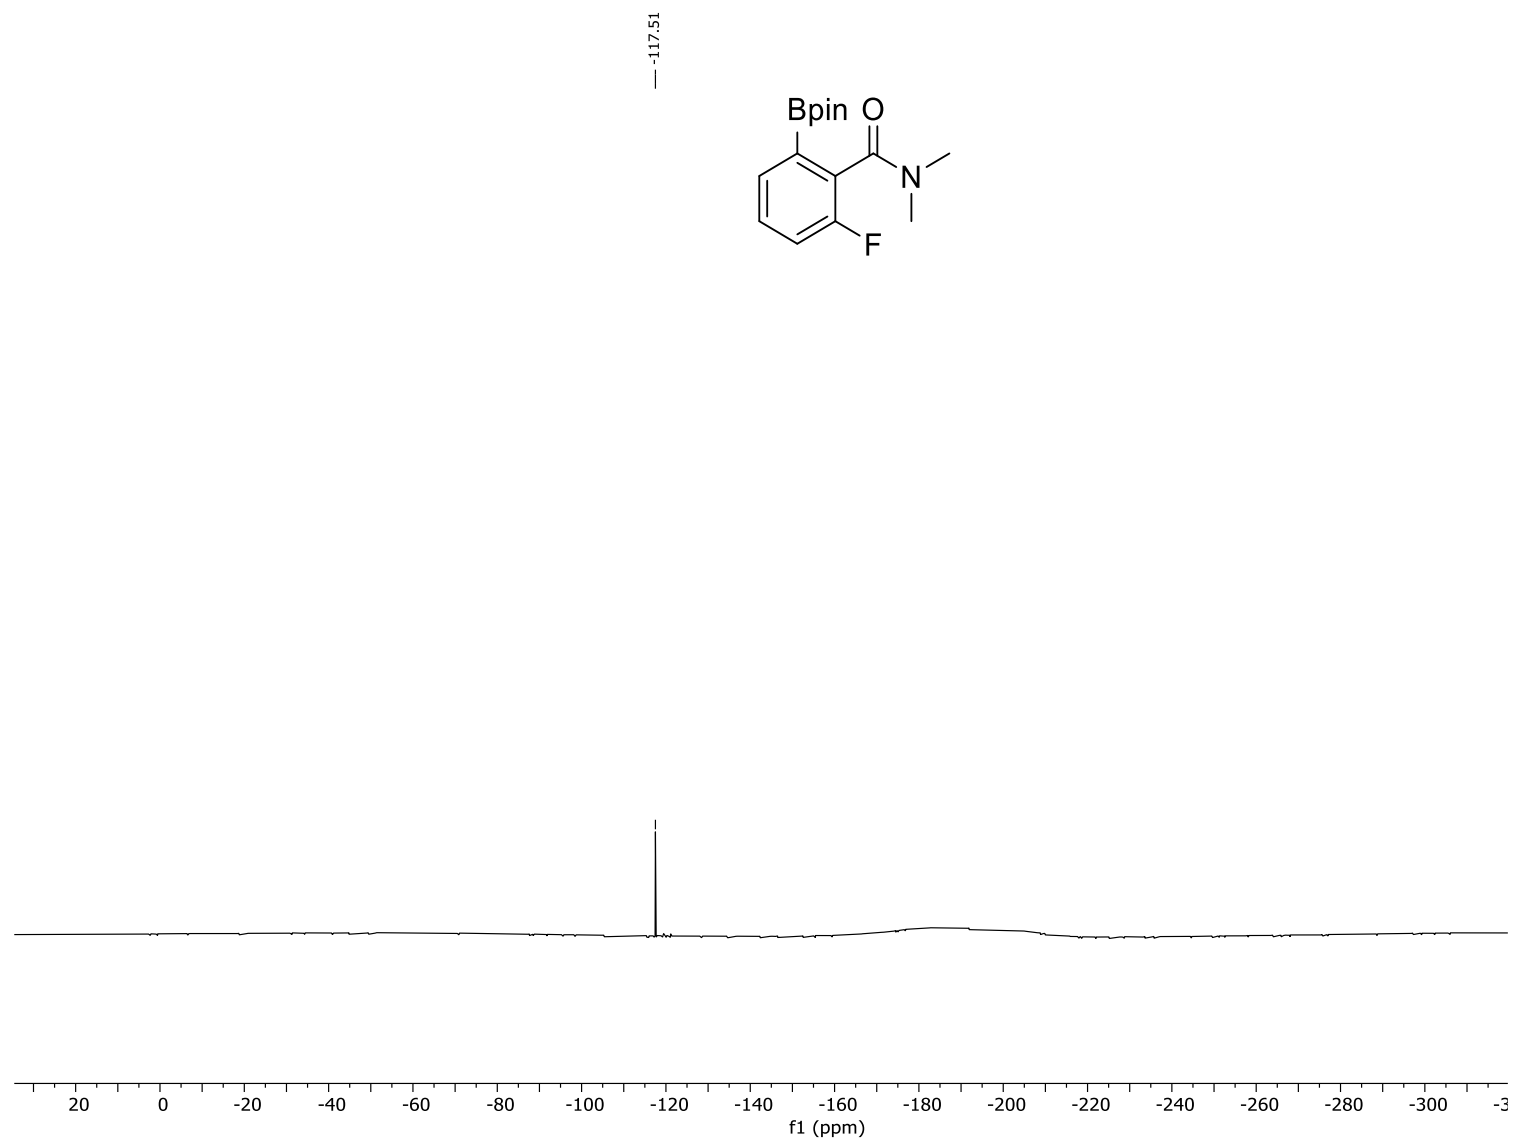

$^{19}\text{F}\{^1\text{H}\}$  NMR (CDCl<sub>3</sub>, 376 MHz) spectrum spectrum of **2f**.

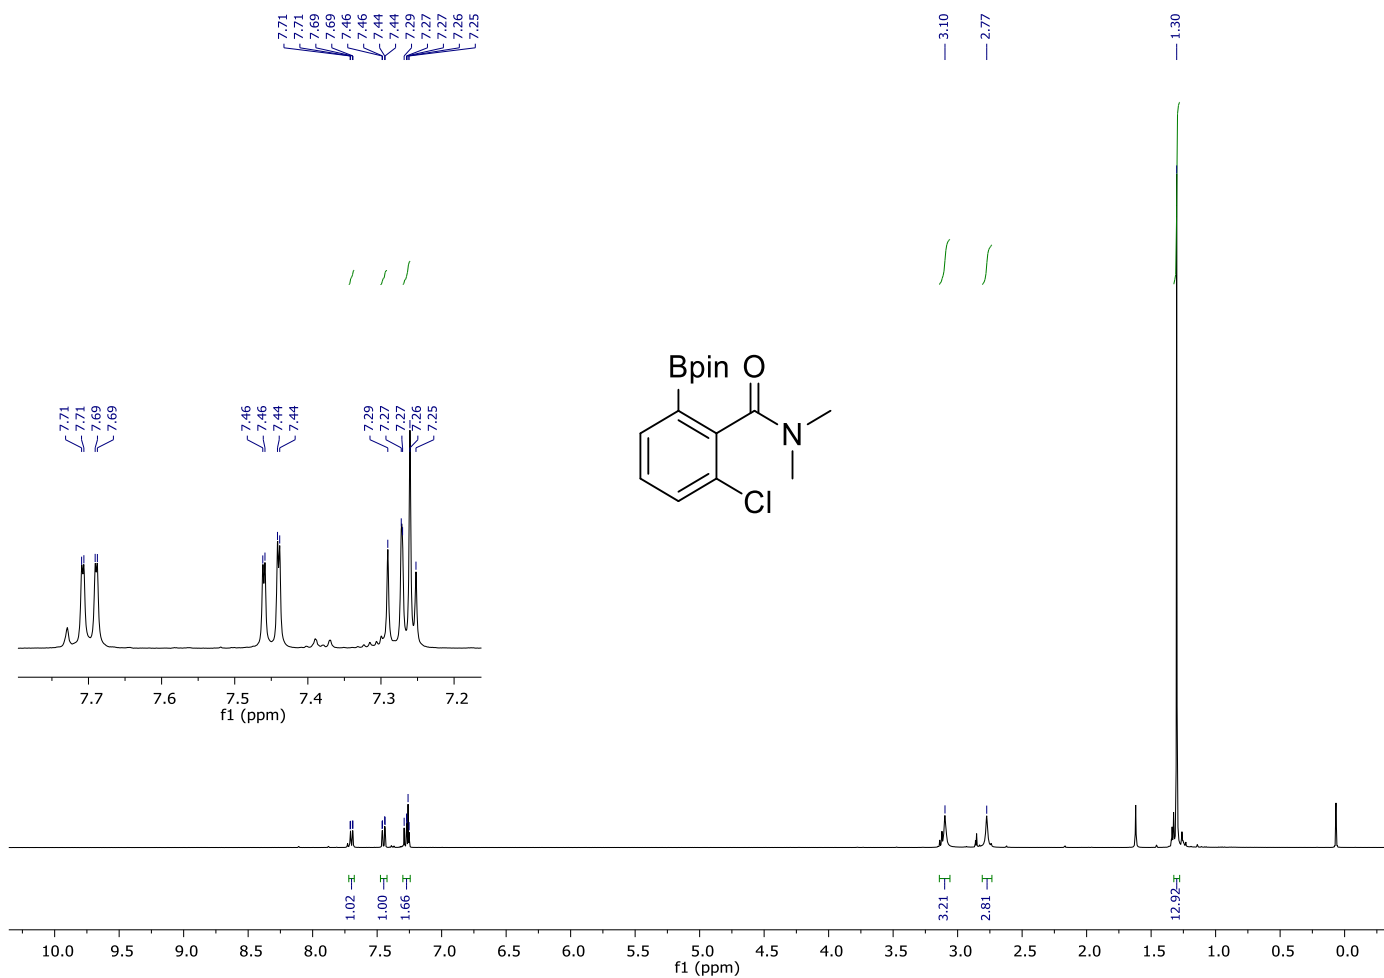

<sup>1</sup>H NMR (CDCl<sub>3</sub>, 400 MHz) spectrum of **2g**.

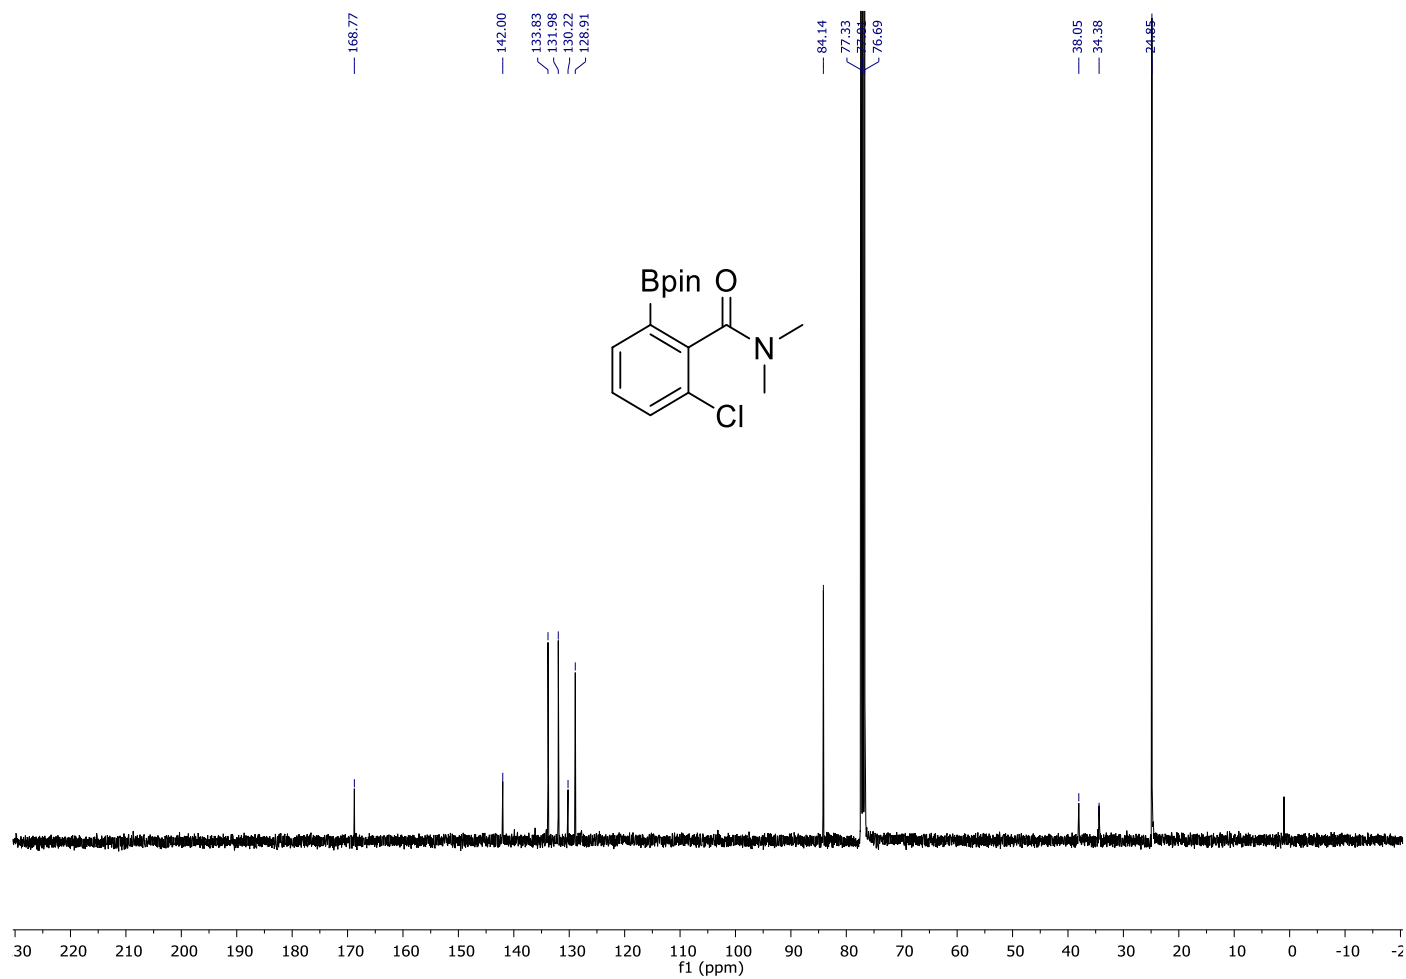

$^{13}\text{C}\{^1\text{H}\}$  NMR (CDCl<sub>3</sub>, 101 MHz) spectrum of **2g**.

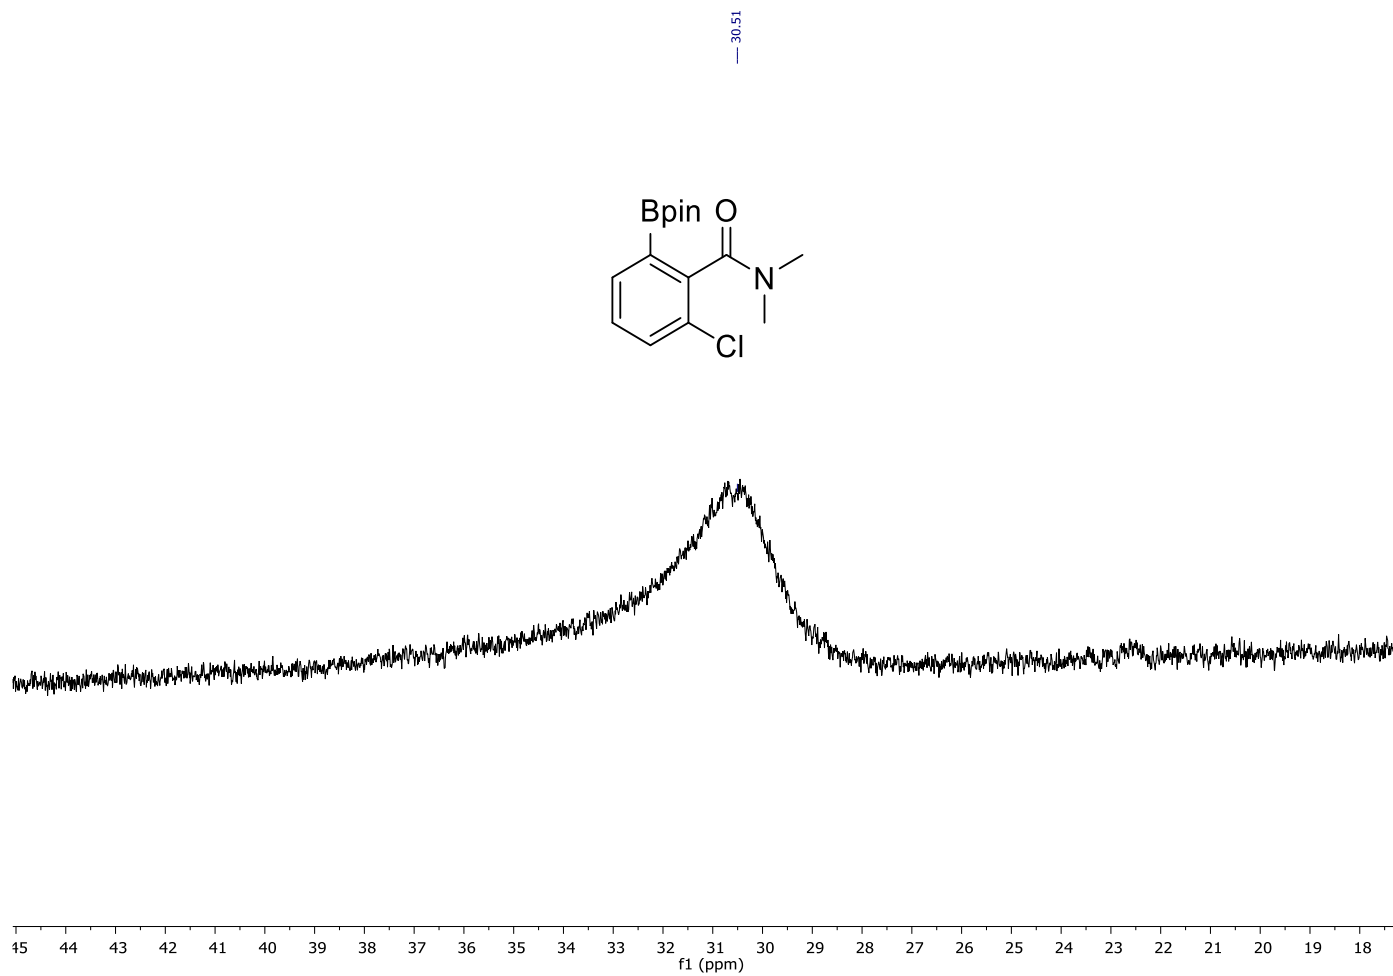

$^{11}\text{B}\{^1\text{H}\}$  NMR ( $\text{CDCl}_3$ , 128 MHz) spectrum spectrum of **2g**.

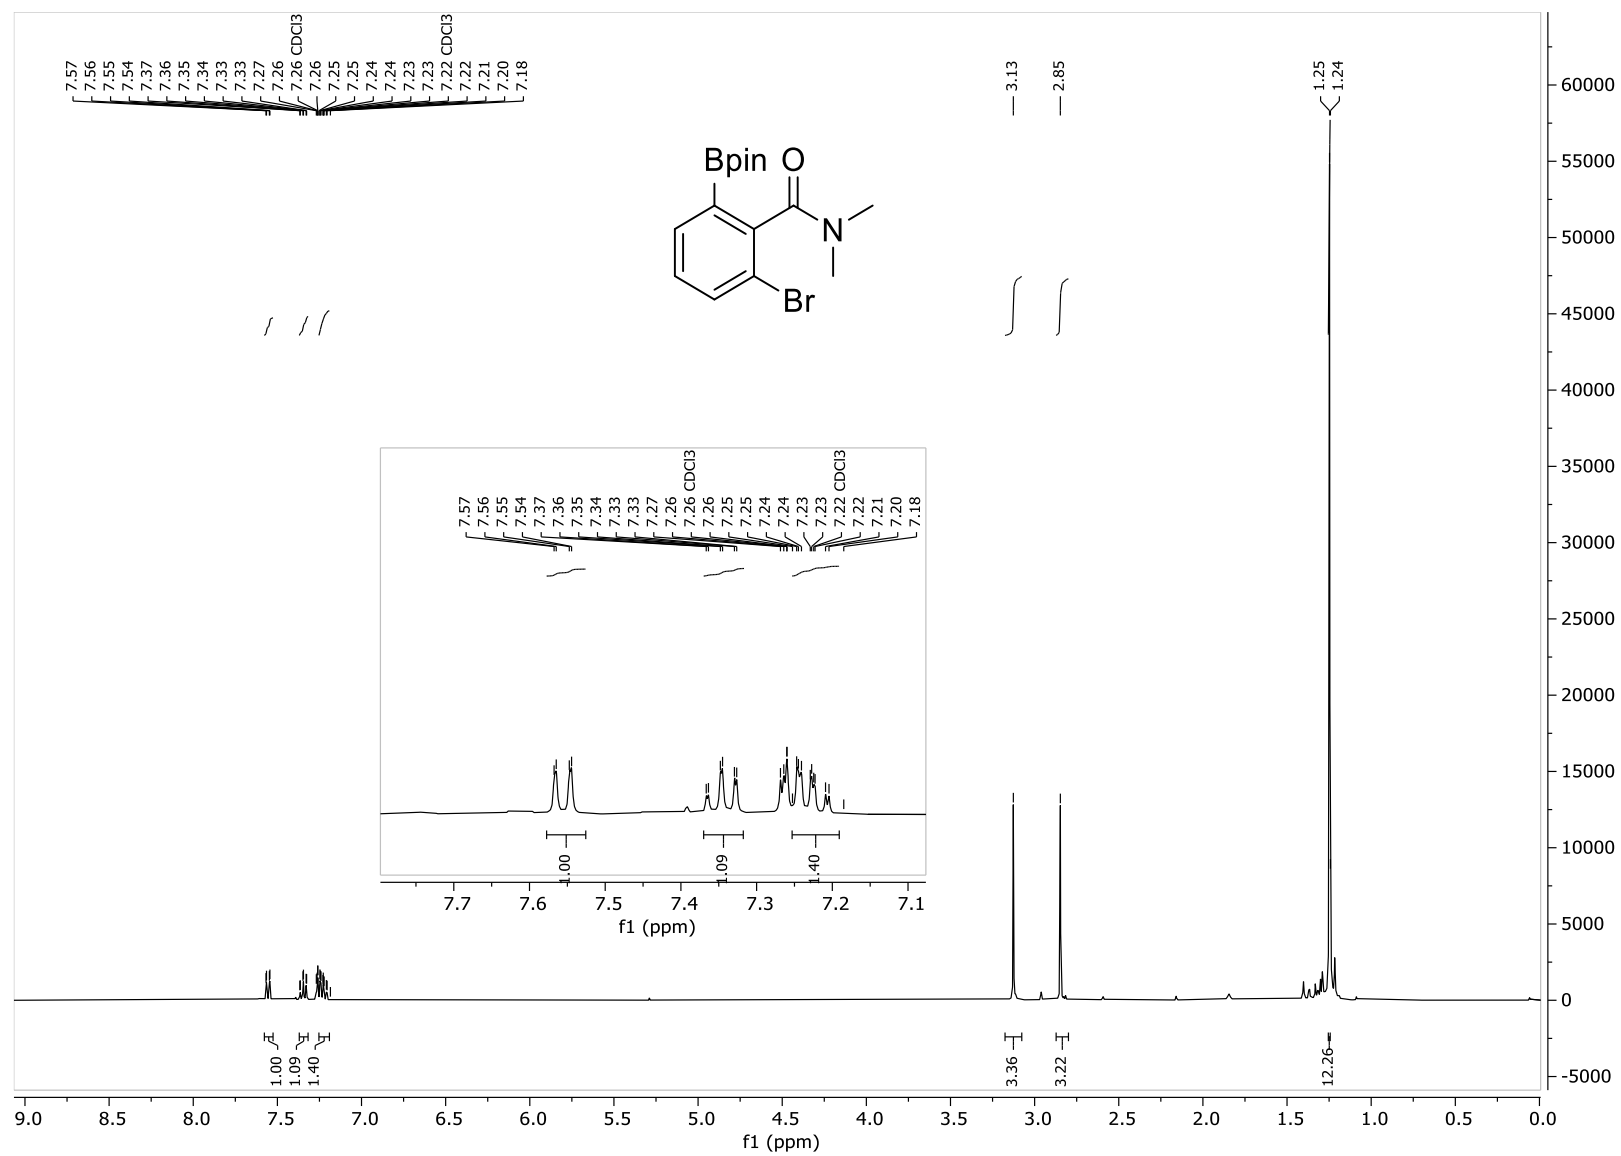

<sup>1</sup>H NMR (CDCl<sub>3</sub>, 400 MHz) spectrum of **2h**.

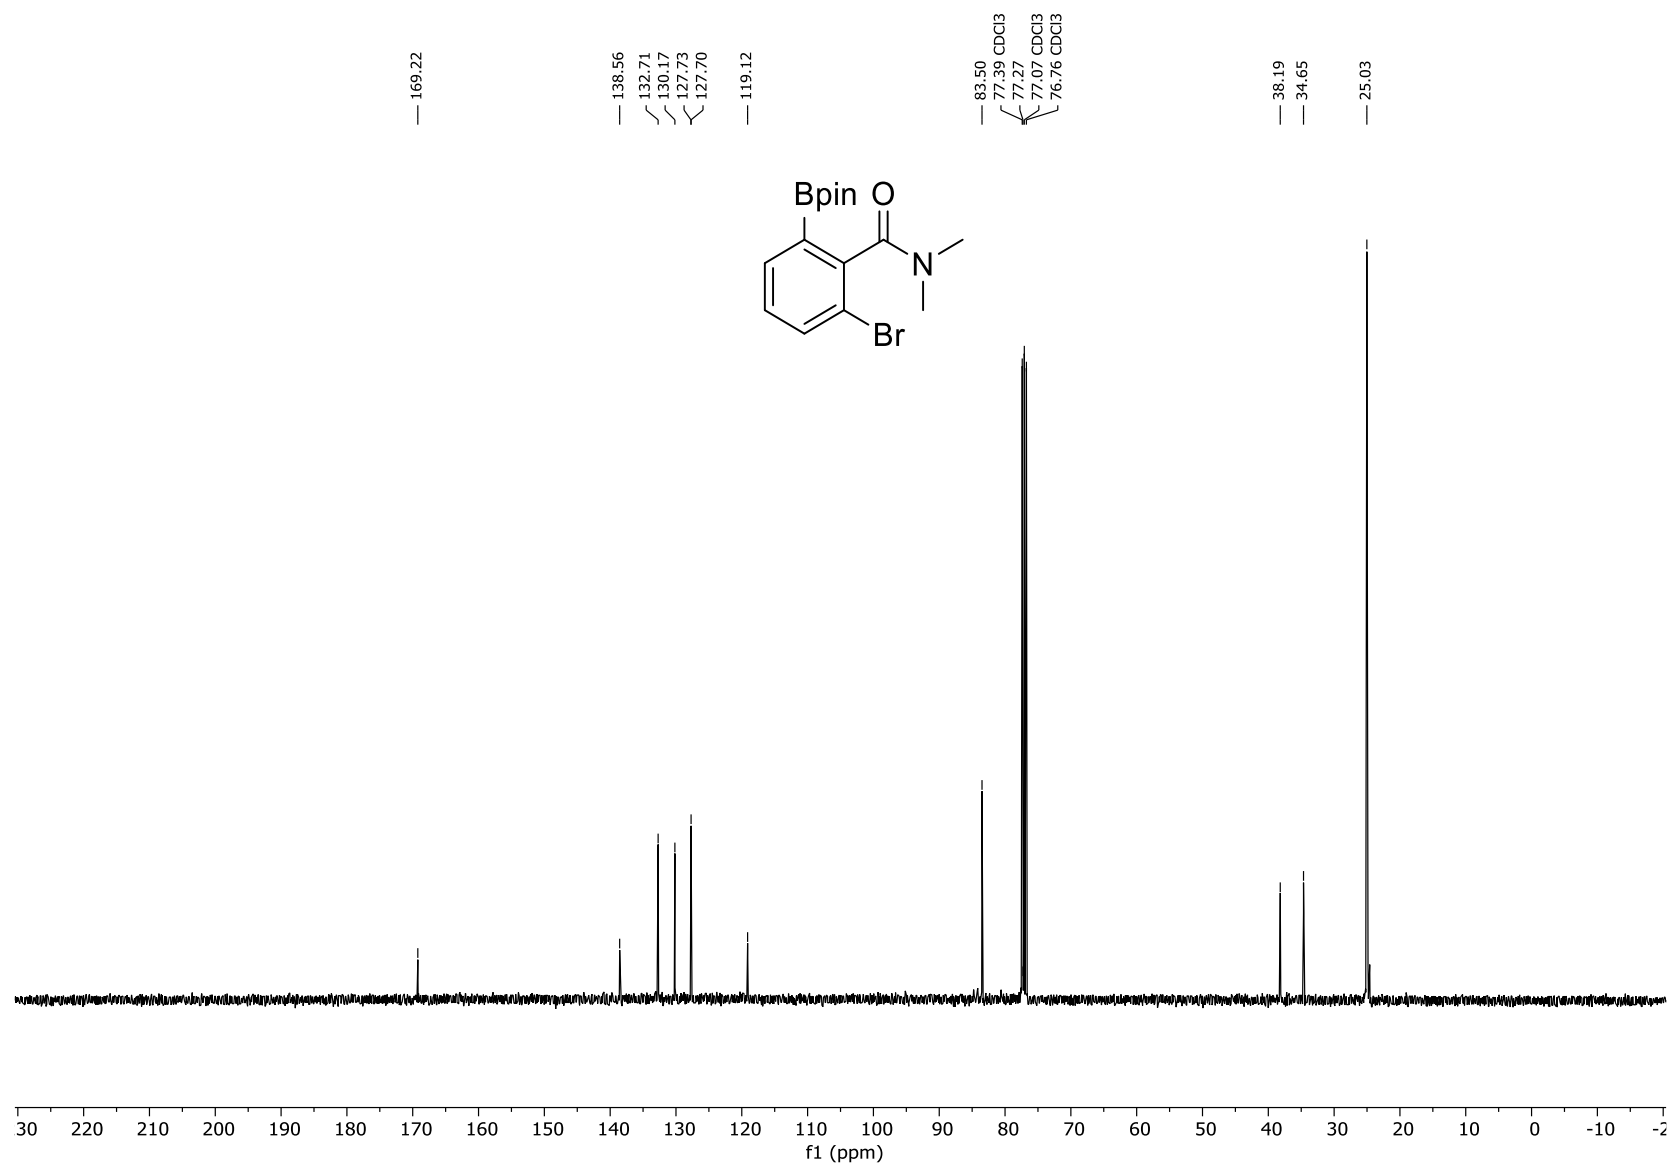

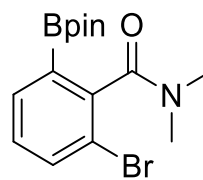

— 30.45

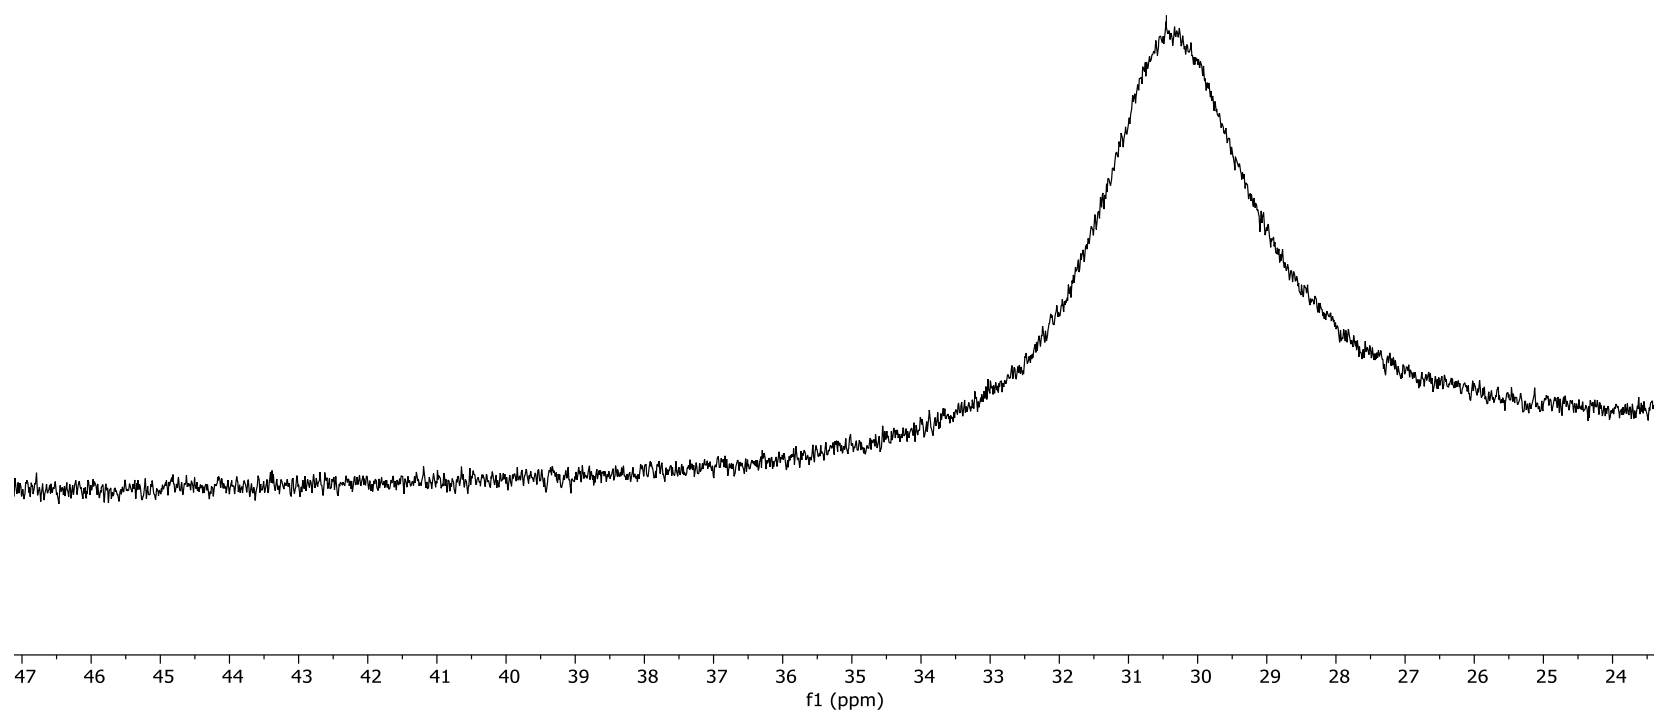

$^{11}\text{B}\{^1\text{H}\}$  NMR ( $\text{CDCl}_3$ , 128 MHz) spectrum spectrum of **2h**.

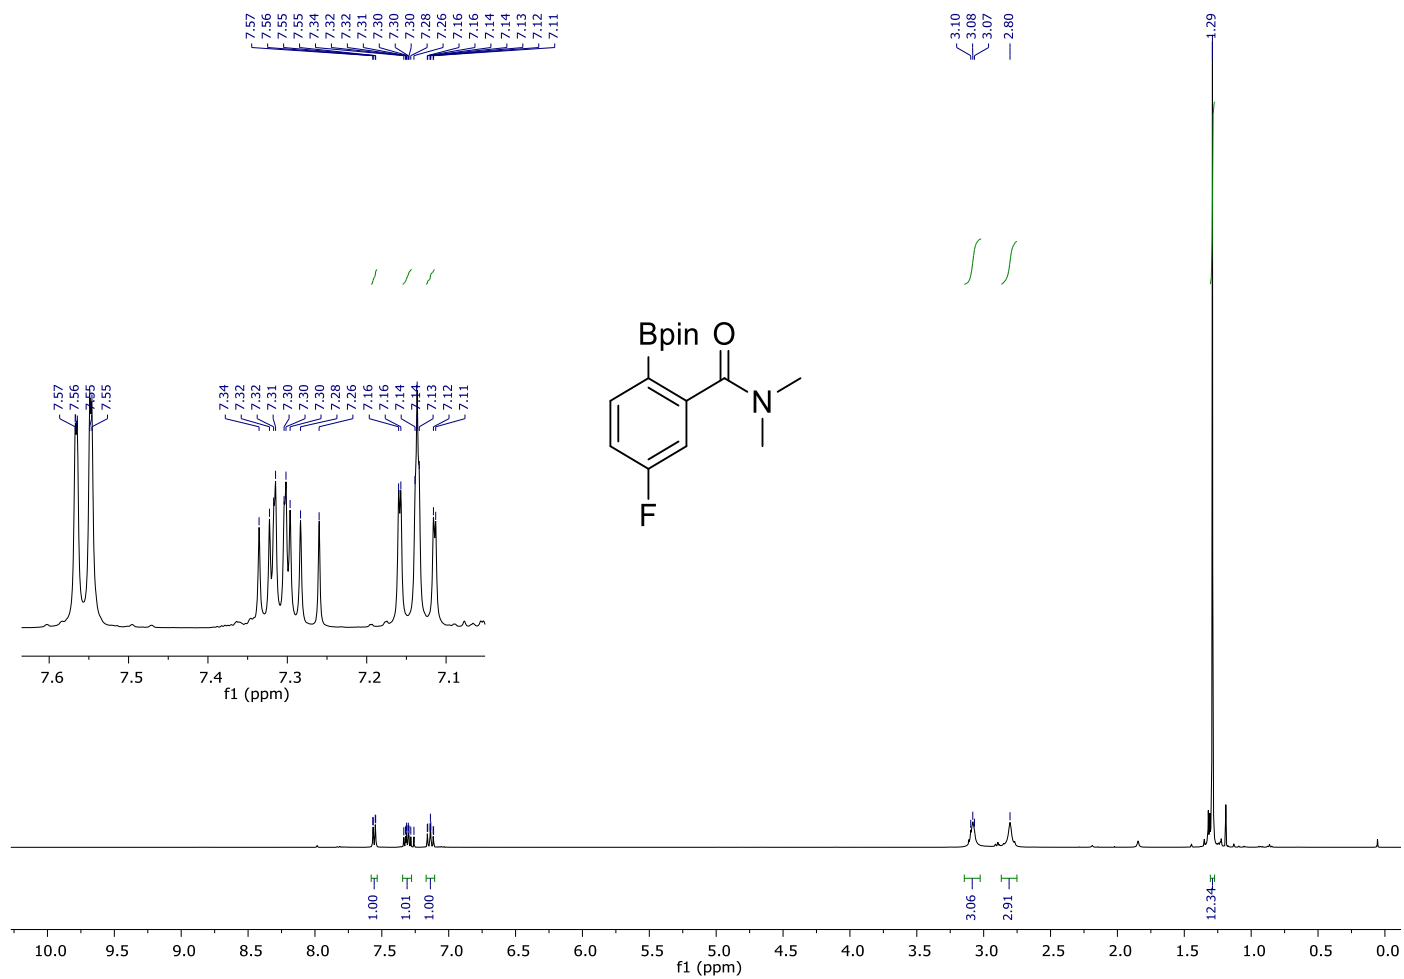

<sup>1</sup>H NMR (CDCl<sub>3</sub>, 400 MHz) spectrum of **2i**.

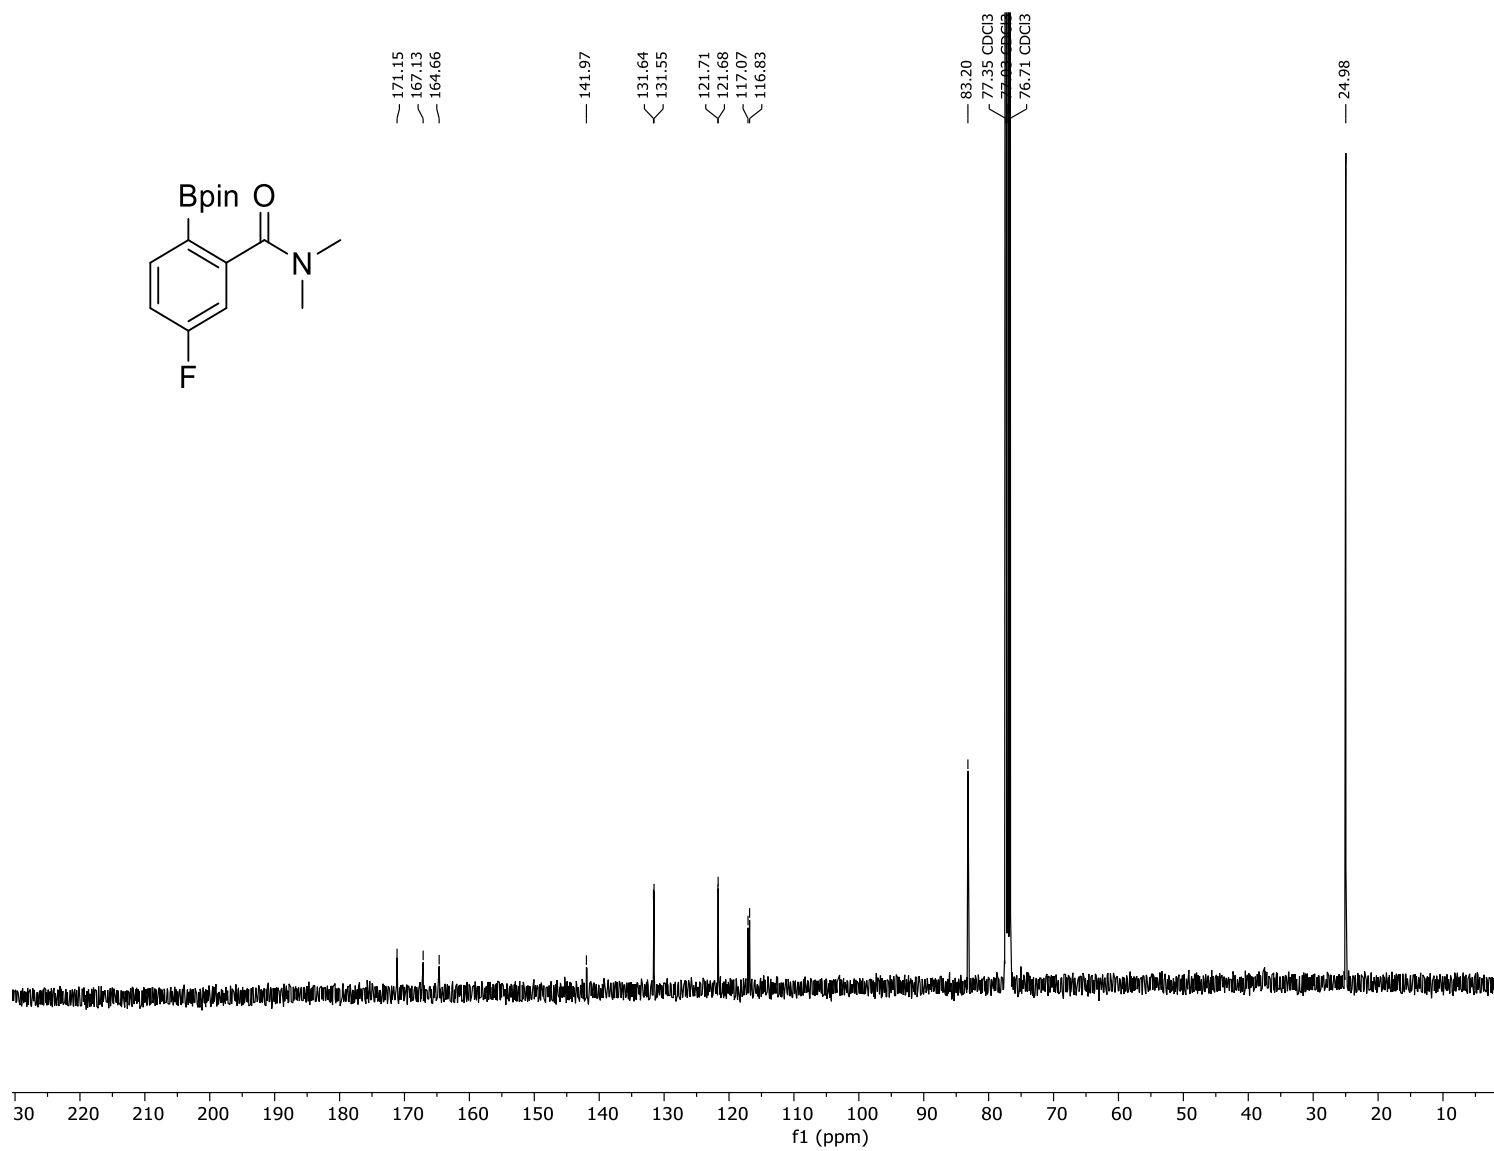

$^{13}\text{C}\{^1\text{H}\}$  NMR (CDCl<sub>3</sub>, 101 MHz) spectrum of **2i**.

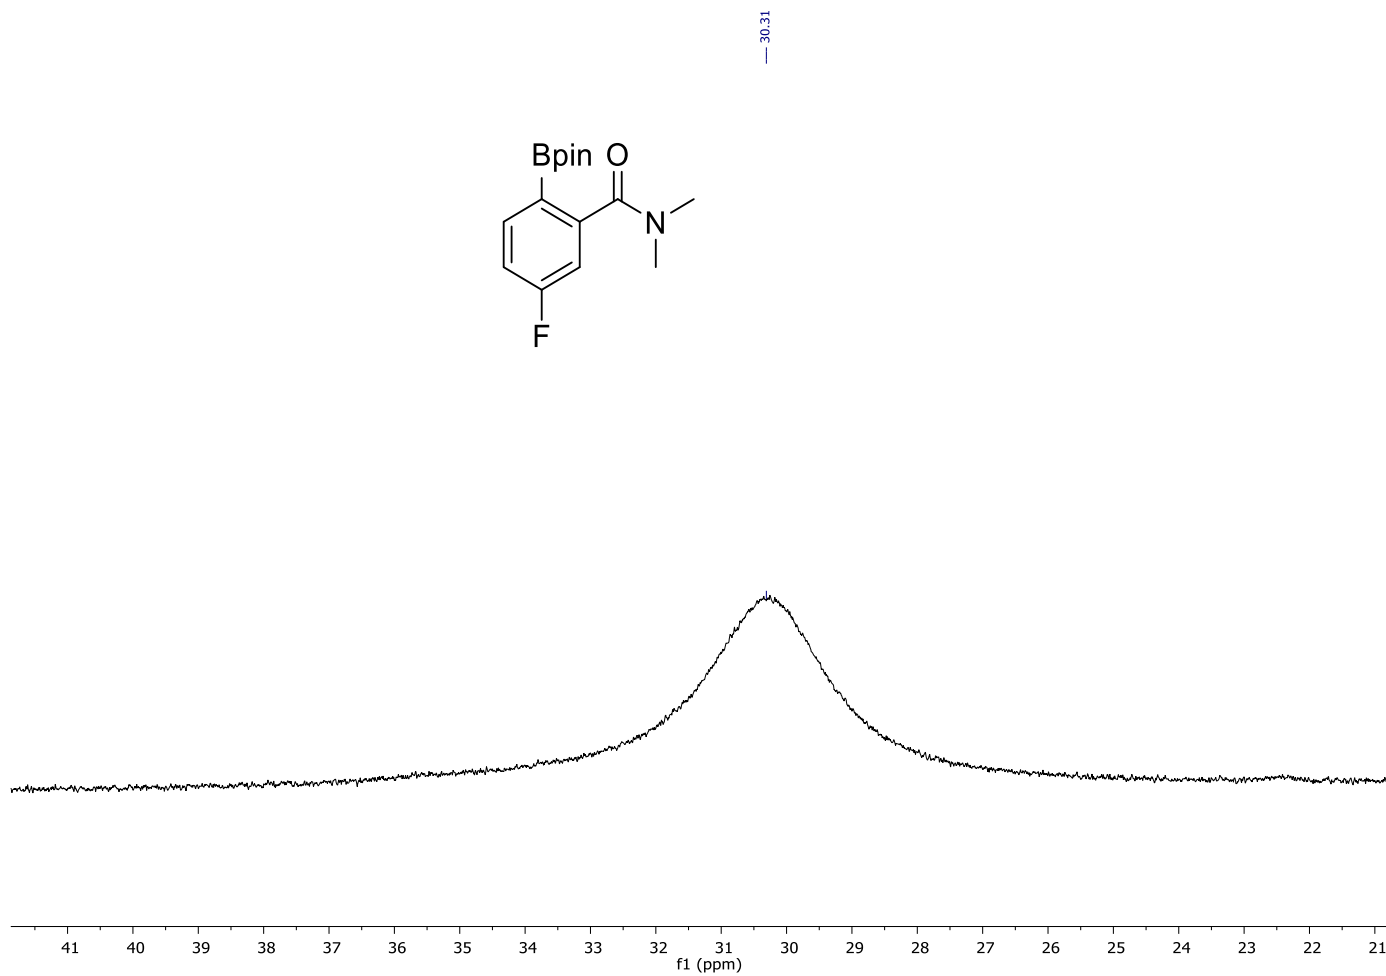

$^{11}\text{B}\{^1\text{H}\}$  NMR (CDCl<sub>3</sub>, 128 MHz) spectrum spectrum of **2i**.

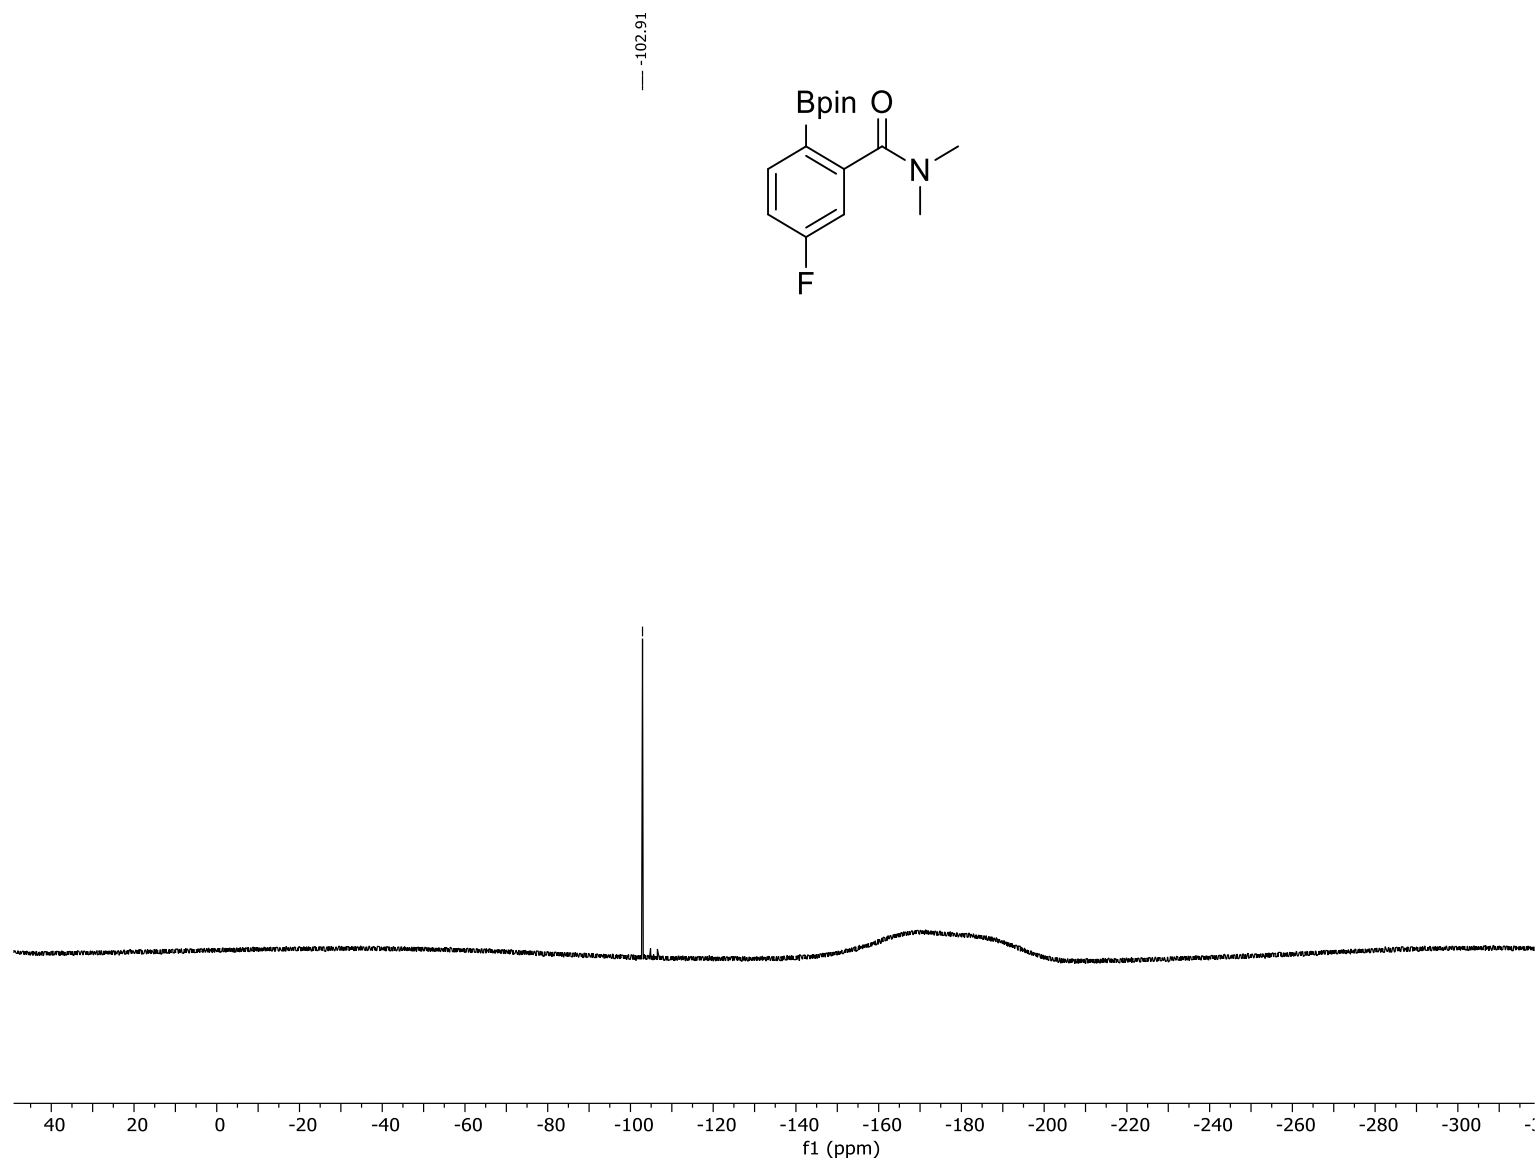

$^{19}\text{F}\{^1\text{H}\}$  NMR ( $\text{CDCl}_3$ , 376 MHz) spectrum of **2i**.

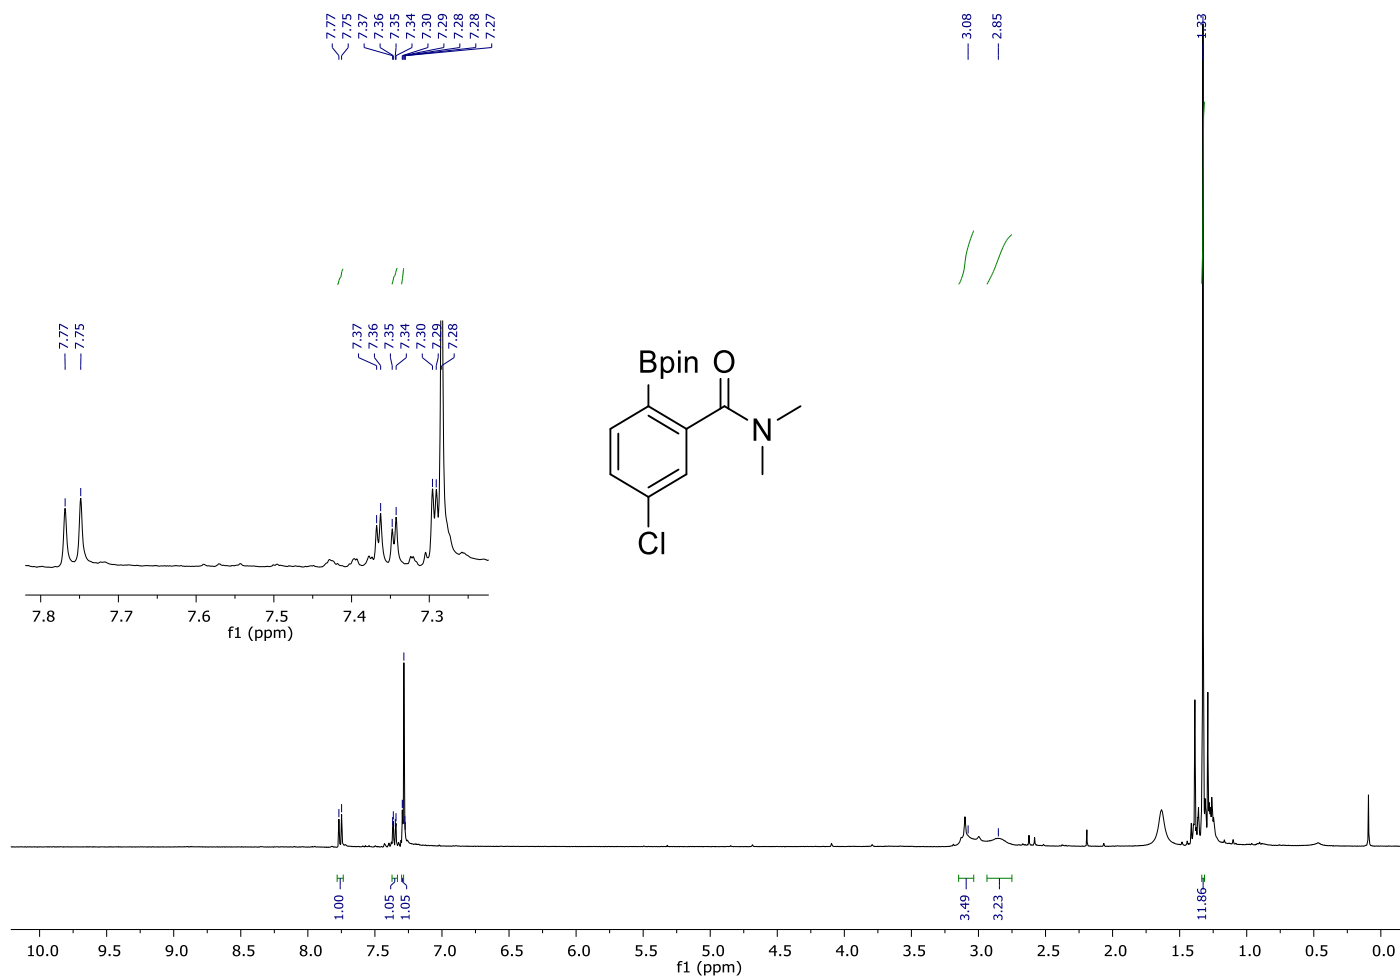

$^1\text{H}$  NMR ( $\text{CDCl}_3$ , 400 MHz) spectrum of **2j**.

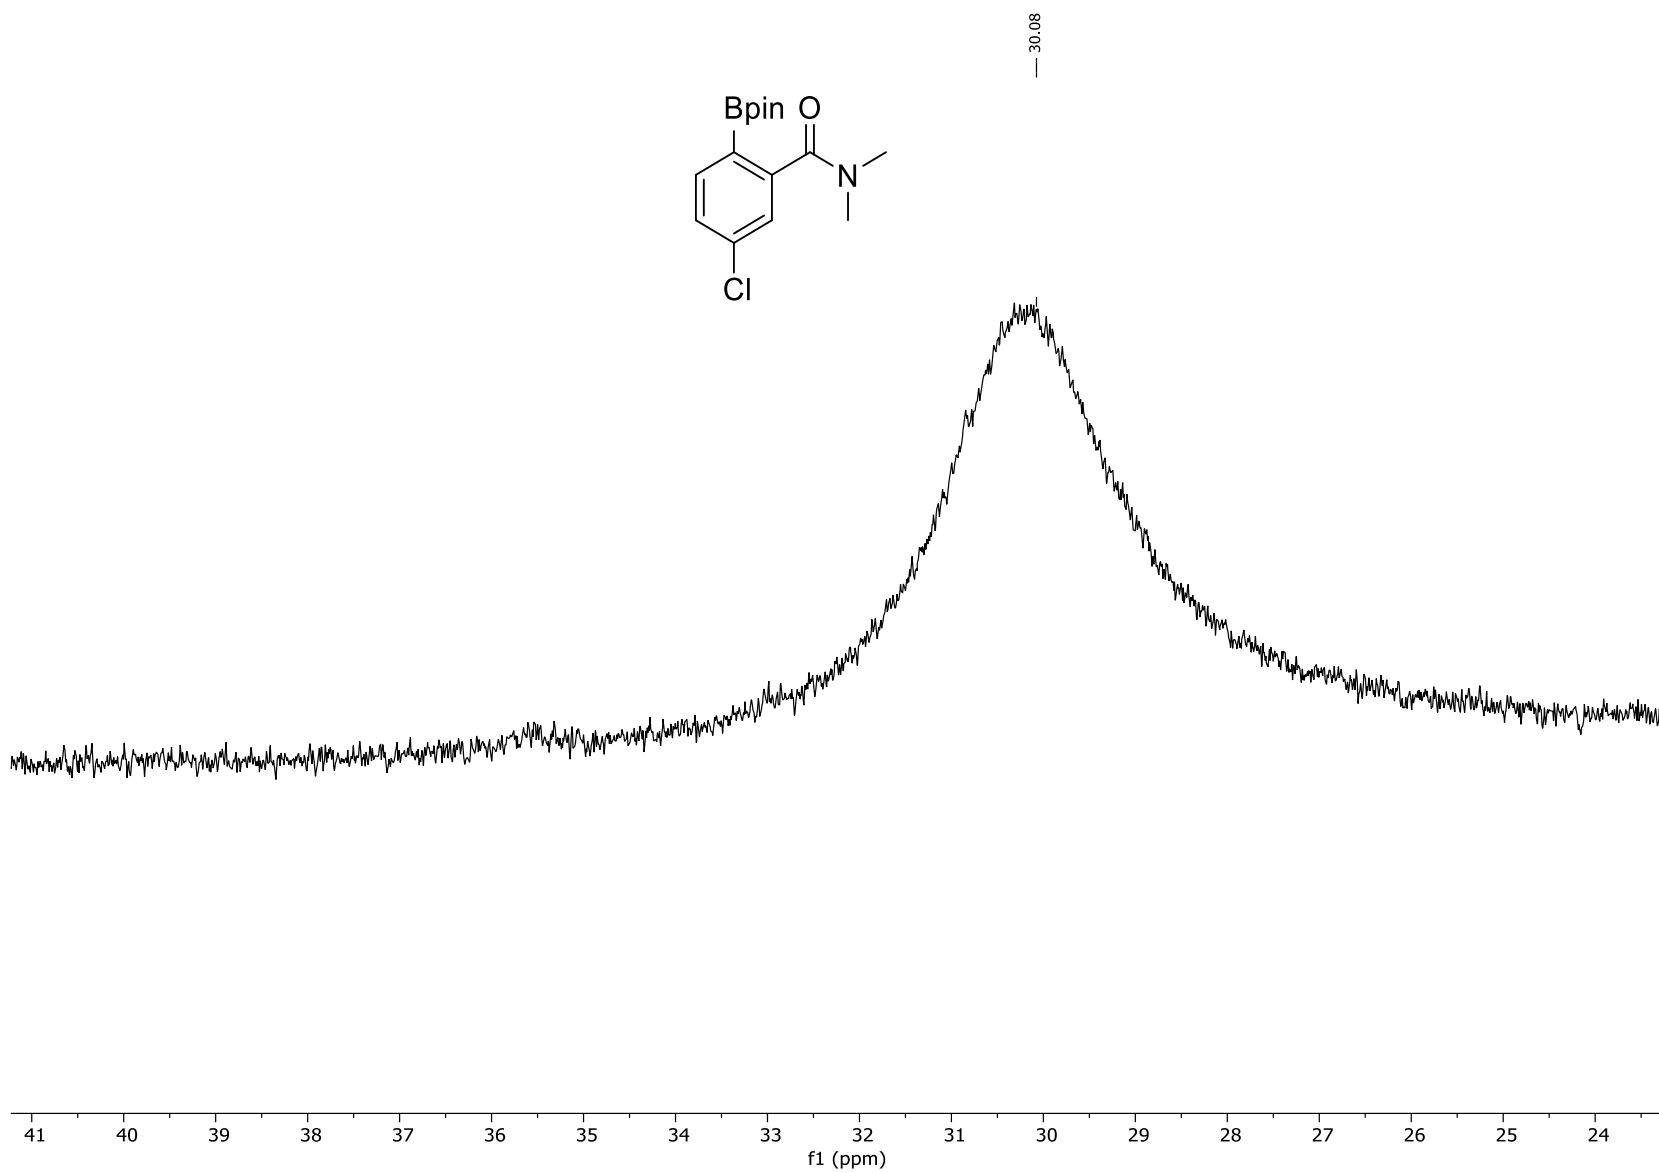

$^{11}\text{B}\{^1\text{H}\}$  NMR ( $\text{CDCl}_3$ , 128 MHz) spectrum spectrum of **2j**.

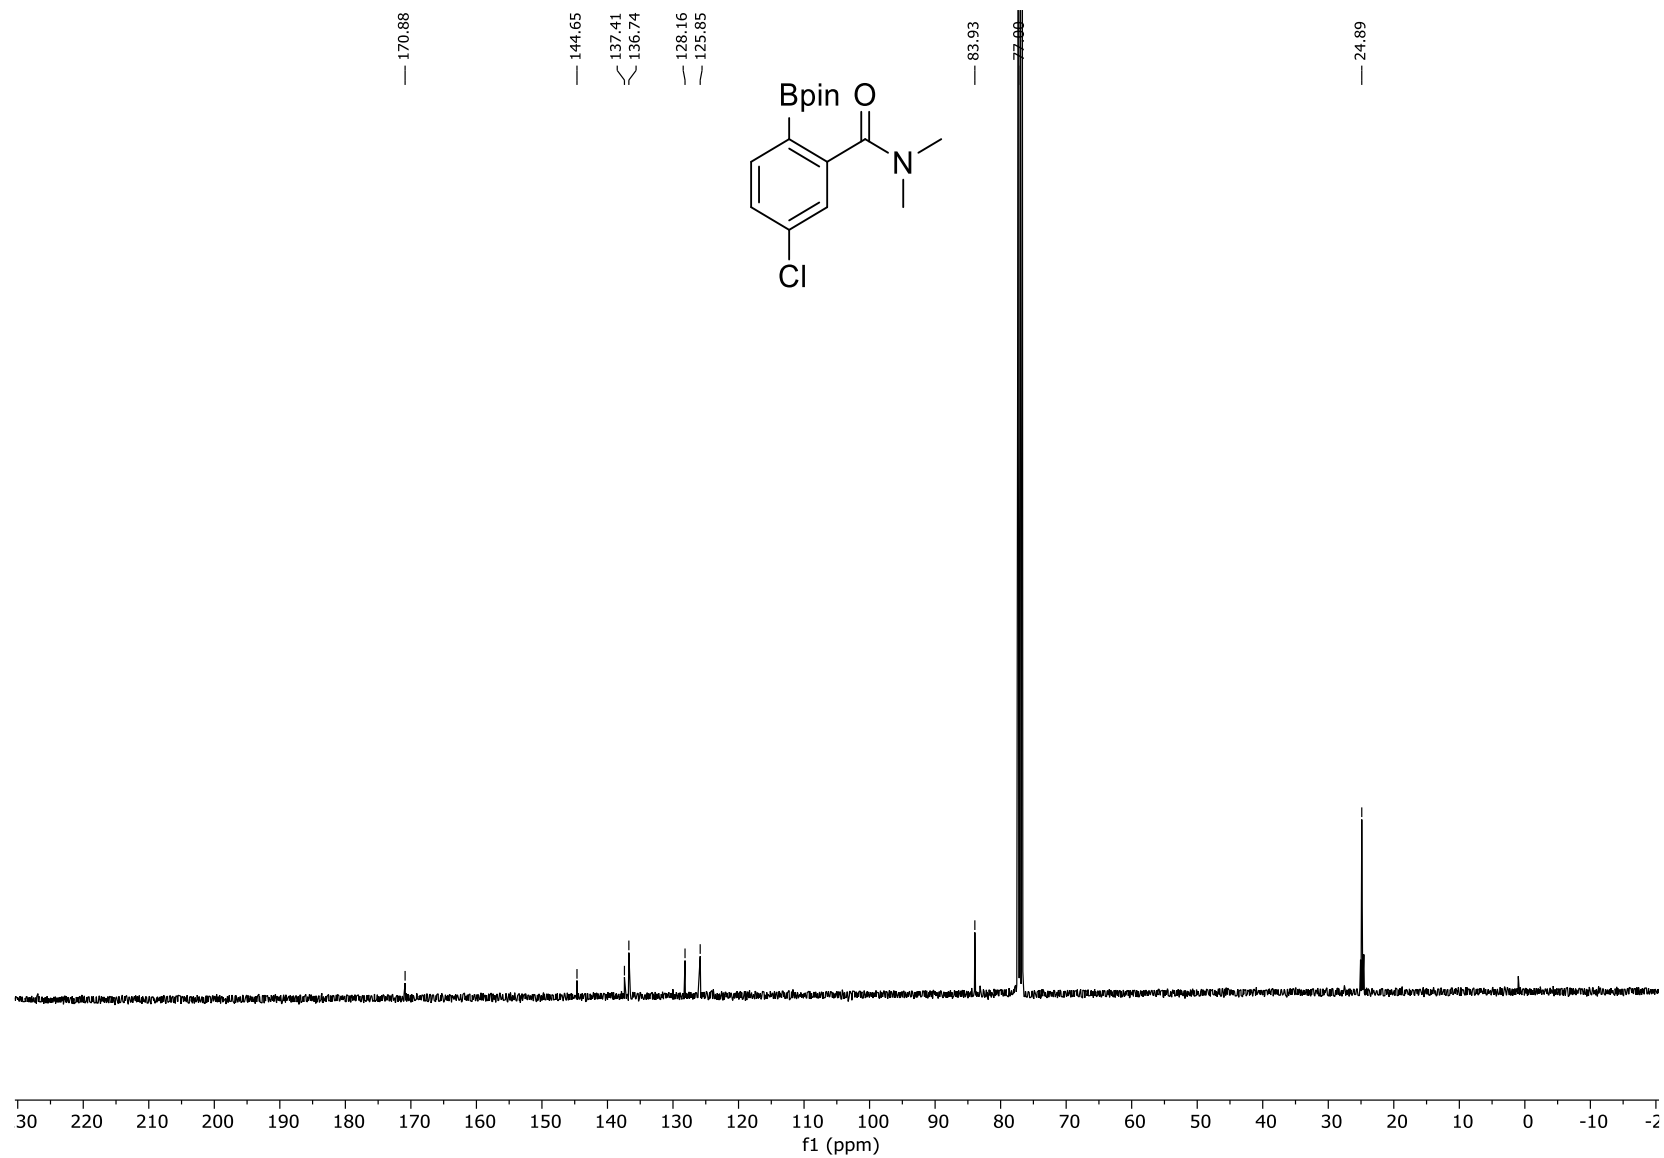

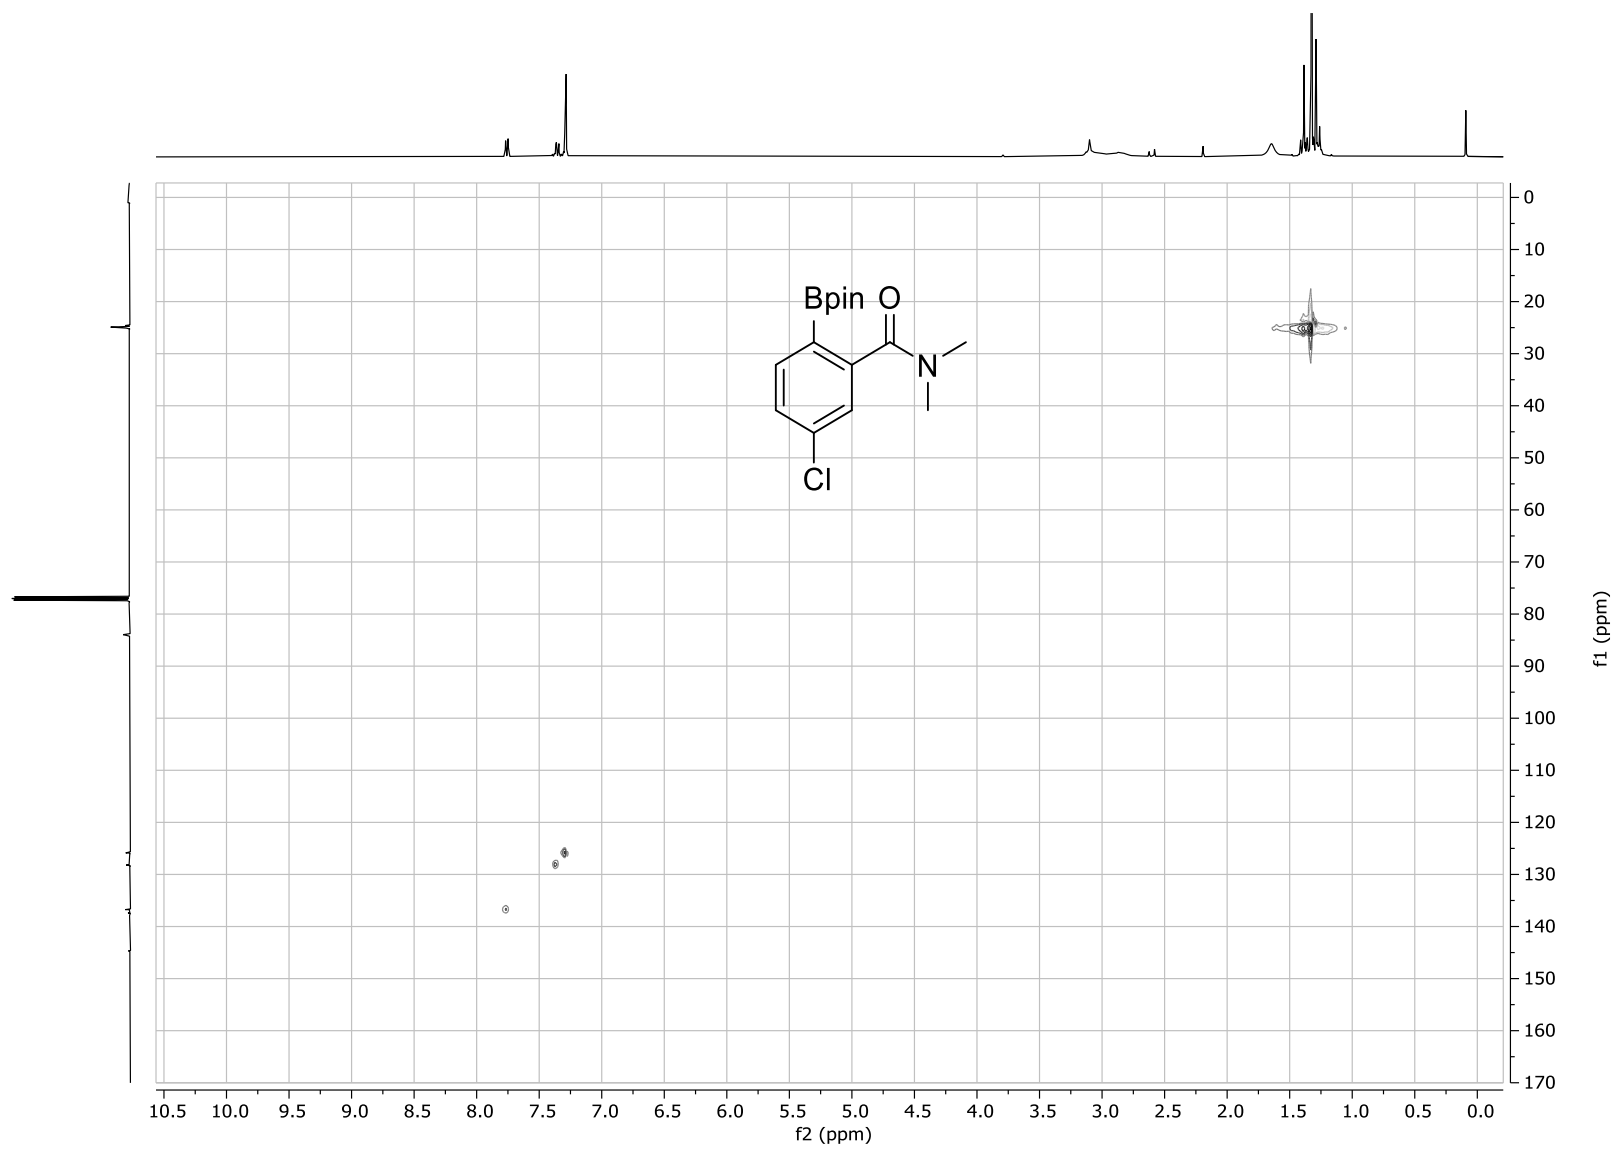

$^1\text{H}$ - $^{13}\text{C}$  HSQC NMR ( $\text{CDCl}_3$ ) spectrum of **2j**.

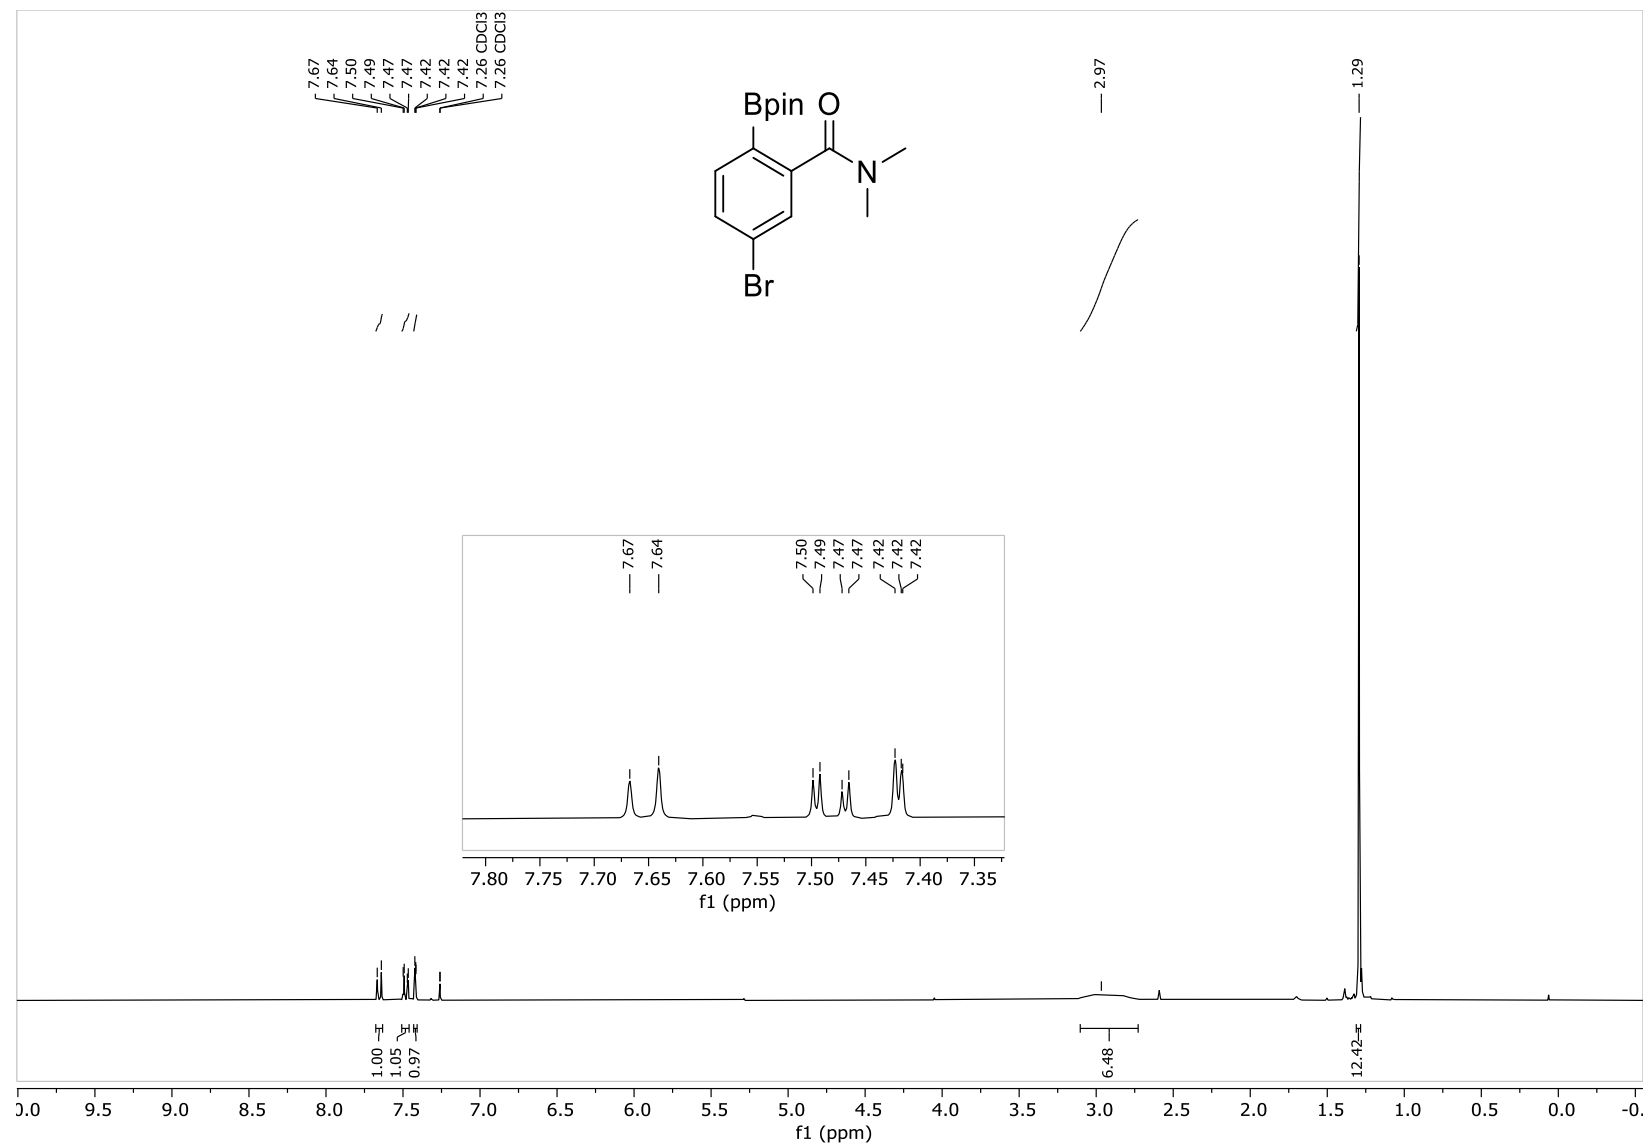

<sup>1</sup>H NMR (CDCl<sub>3</sub>, 400 MHz) spectrum of **2k**.

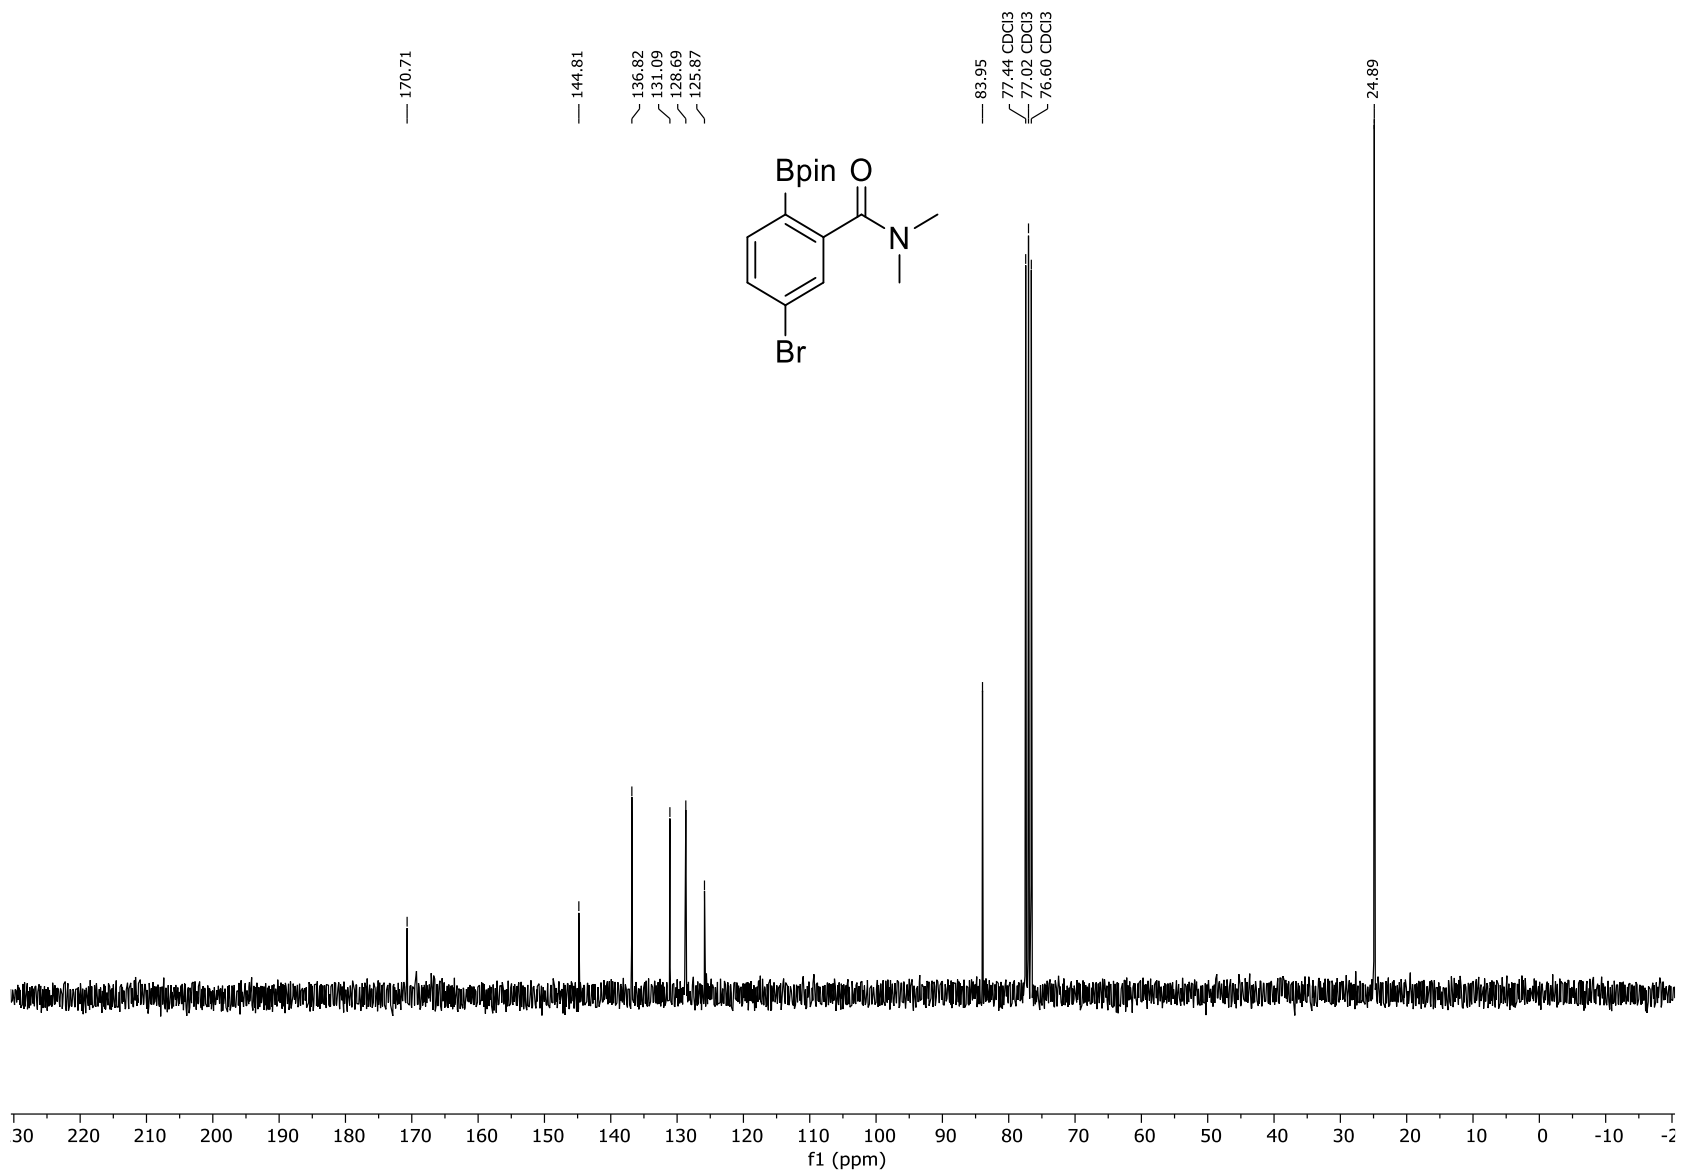

$^{13}\text{C}\{^1\text{H}\}$  NMR (CDCl<sub>3</sub>, 101 MHz) spectrum of **2k**.

S-161

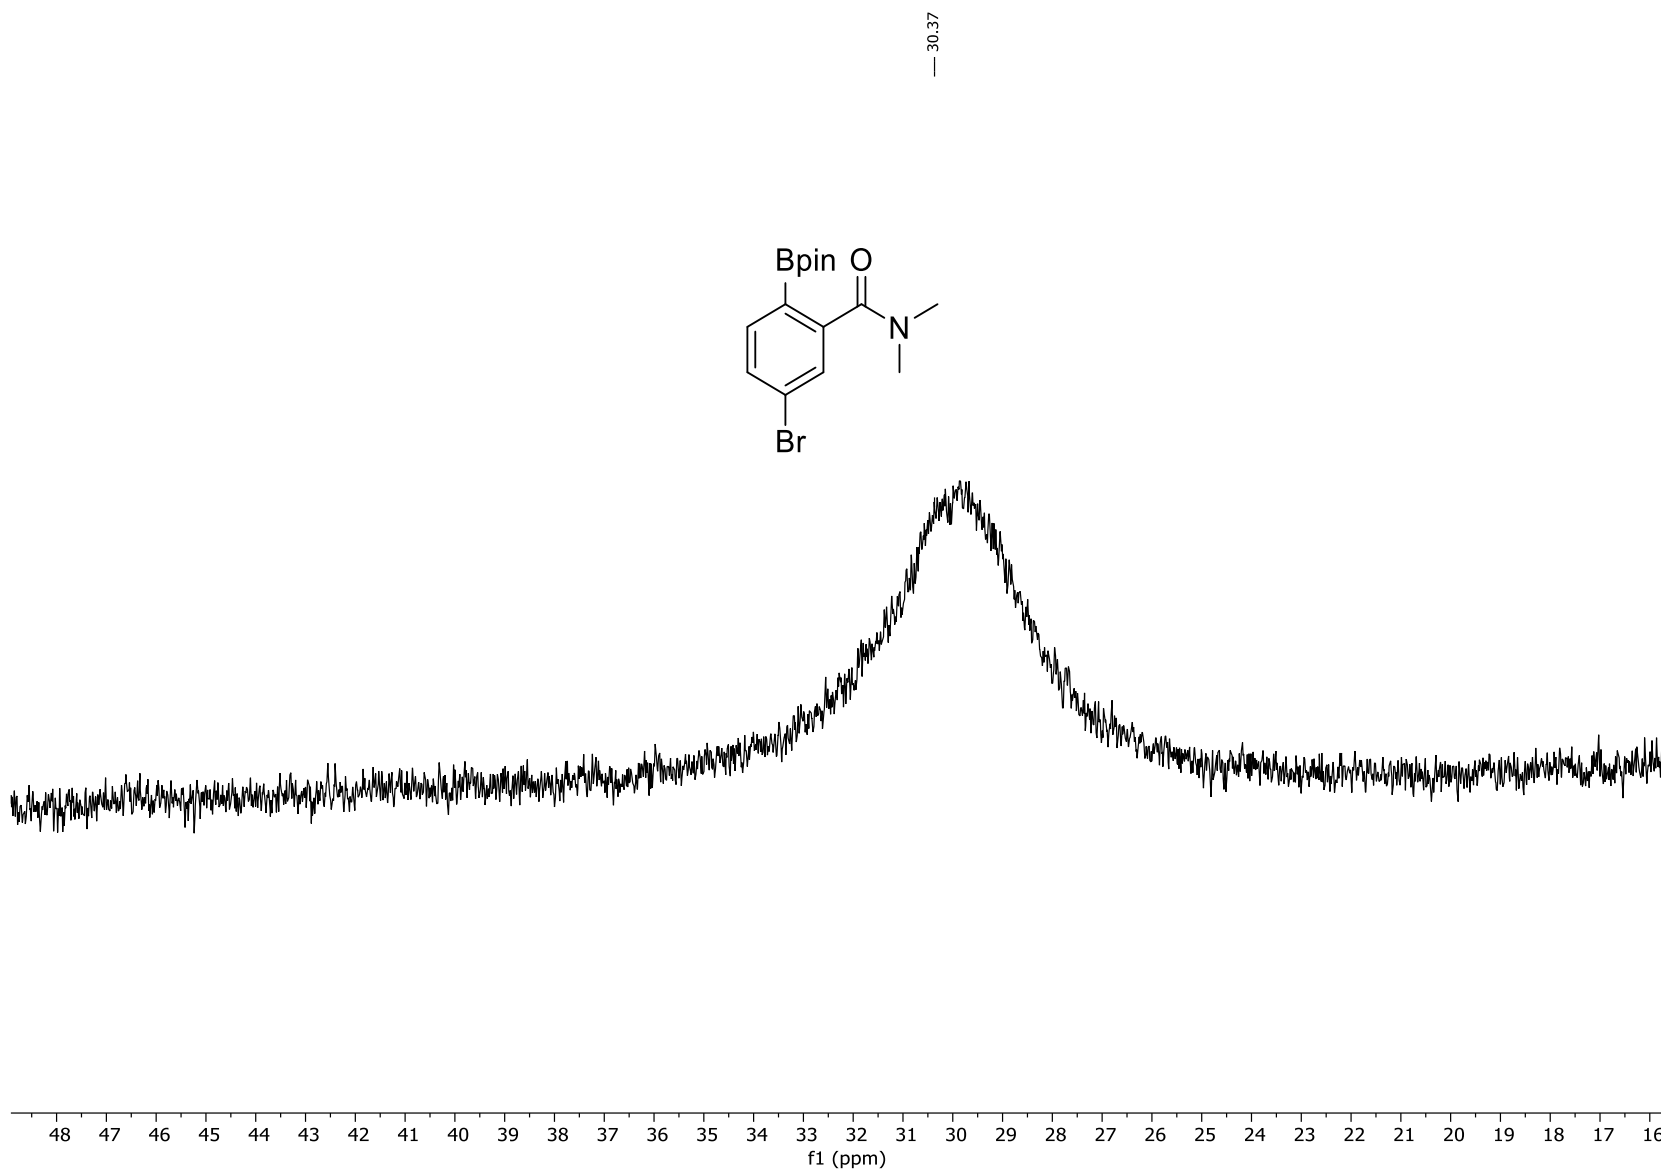

$^{11}\text{B}\{^1\text{H}\}$  NMR ( $\text{CDCl}_3$ , 128 MHz) spectrum spectrum of **2k**.

S-162



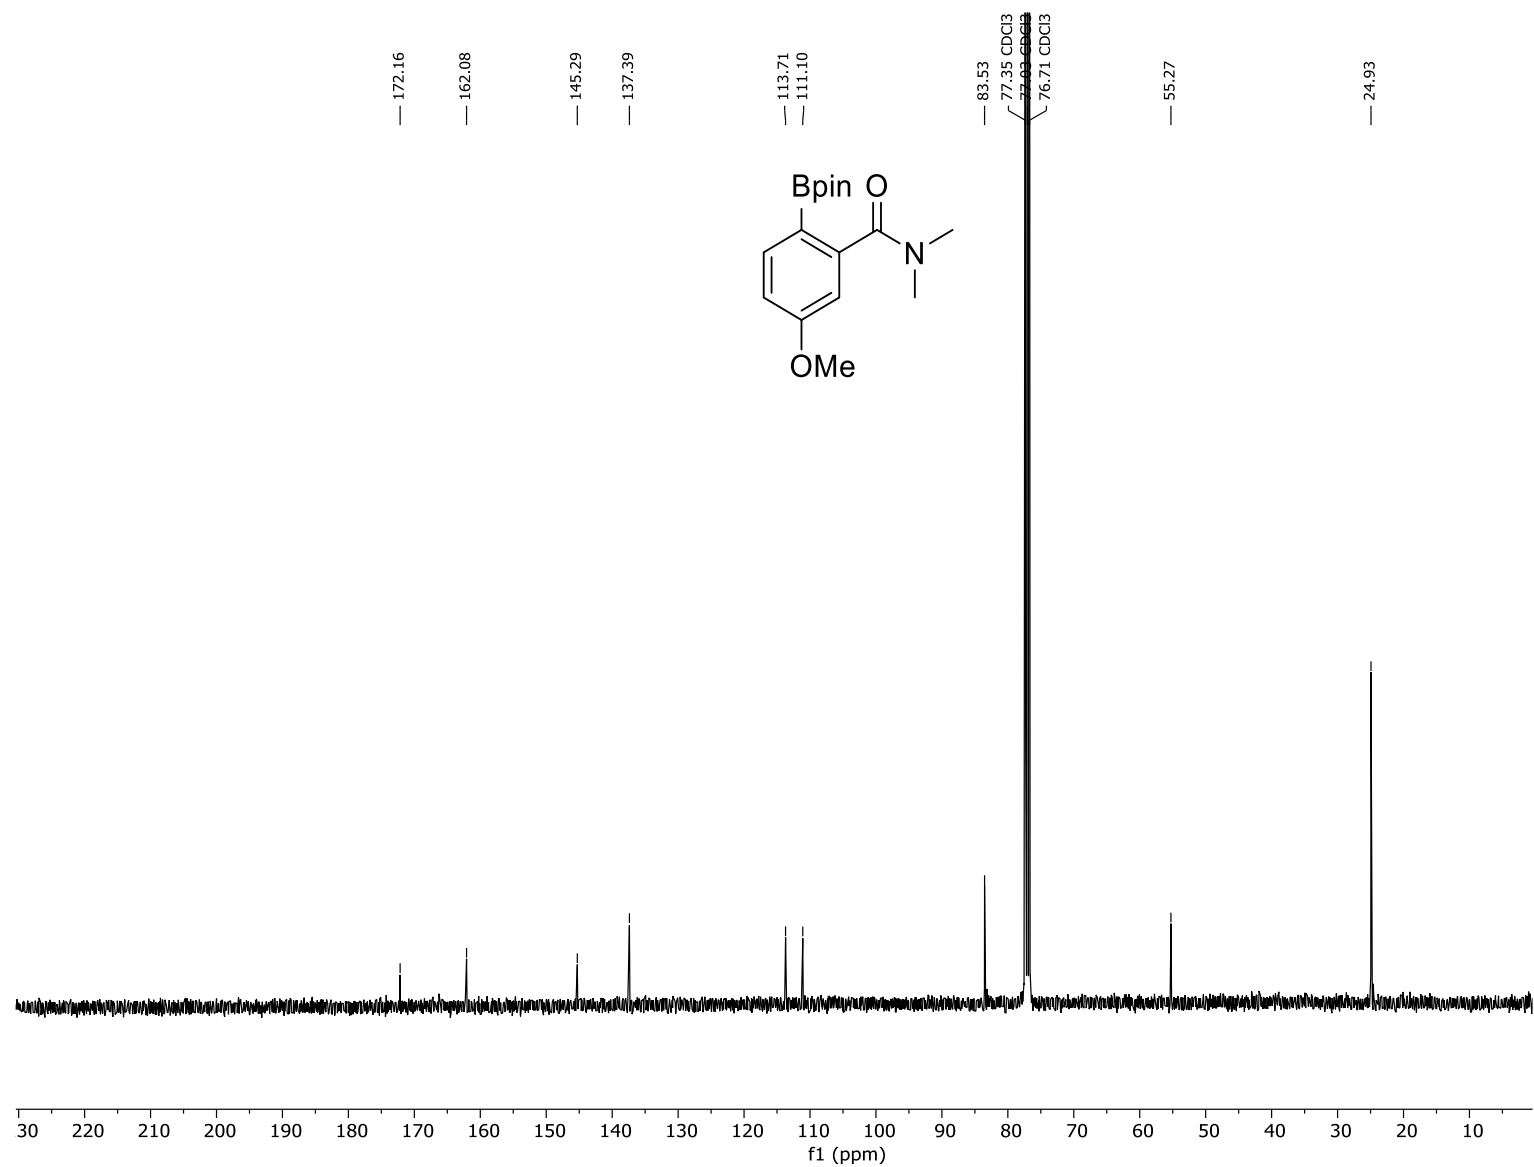

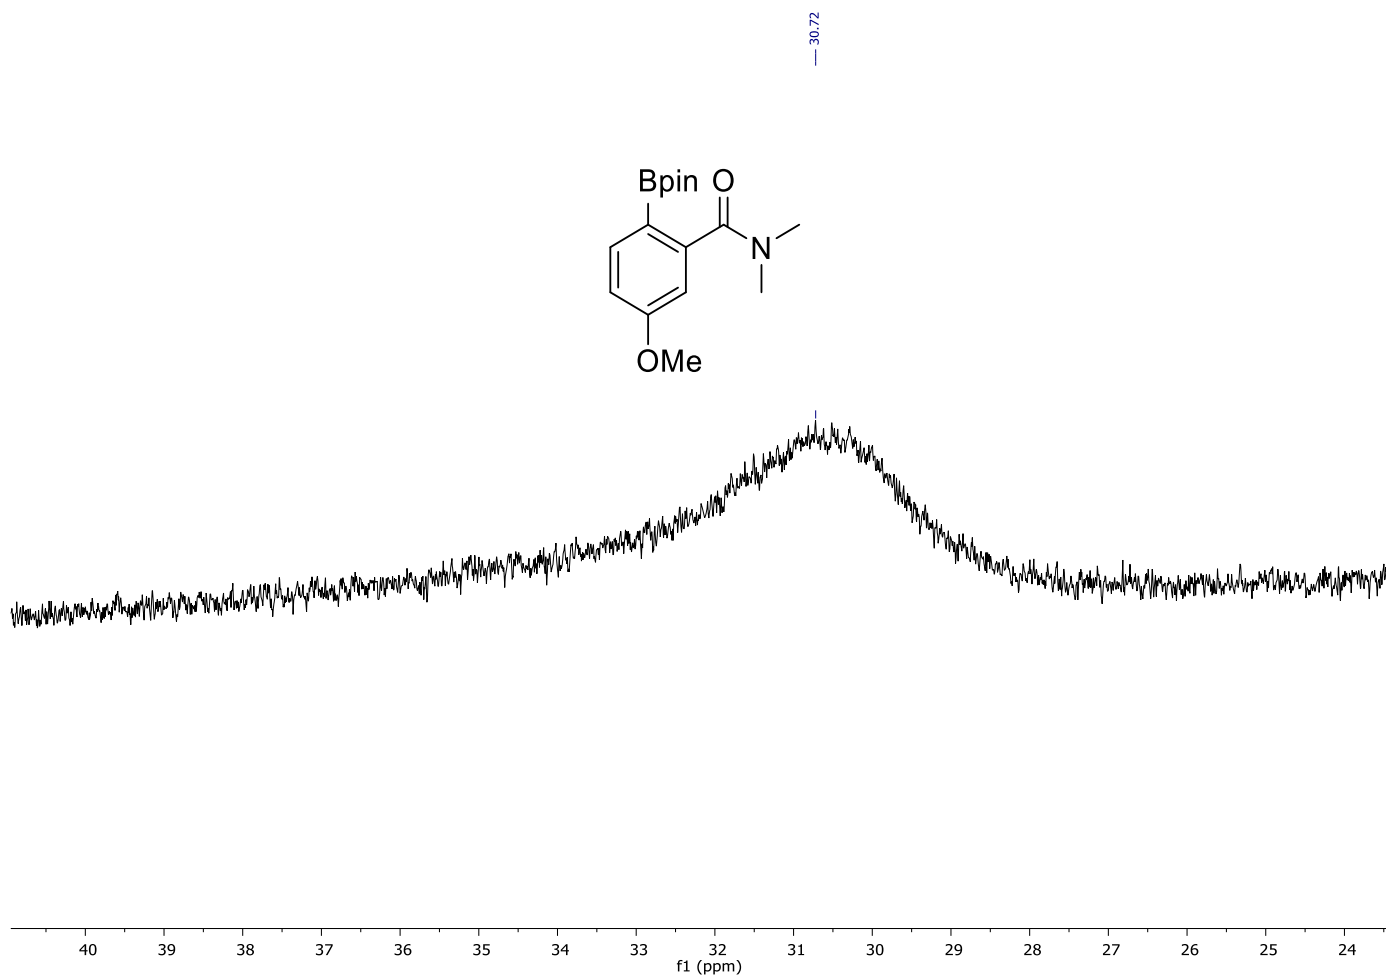

$^{11}\text{B}\{^1\text{H}\}$  NMR (CDCl<sub>3</sub>, 128 MHz) spectrum spectrum of **21**.

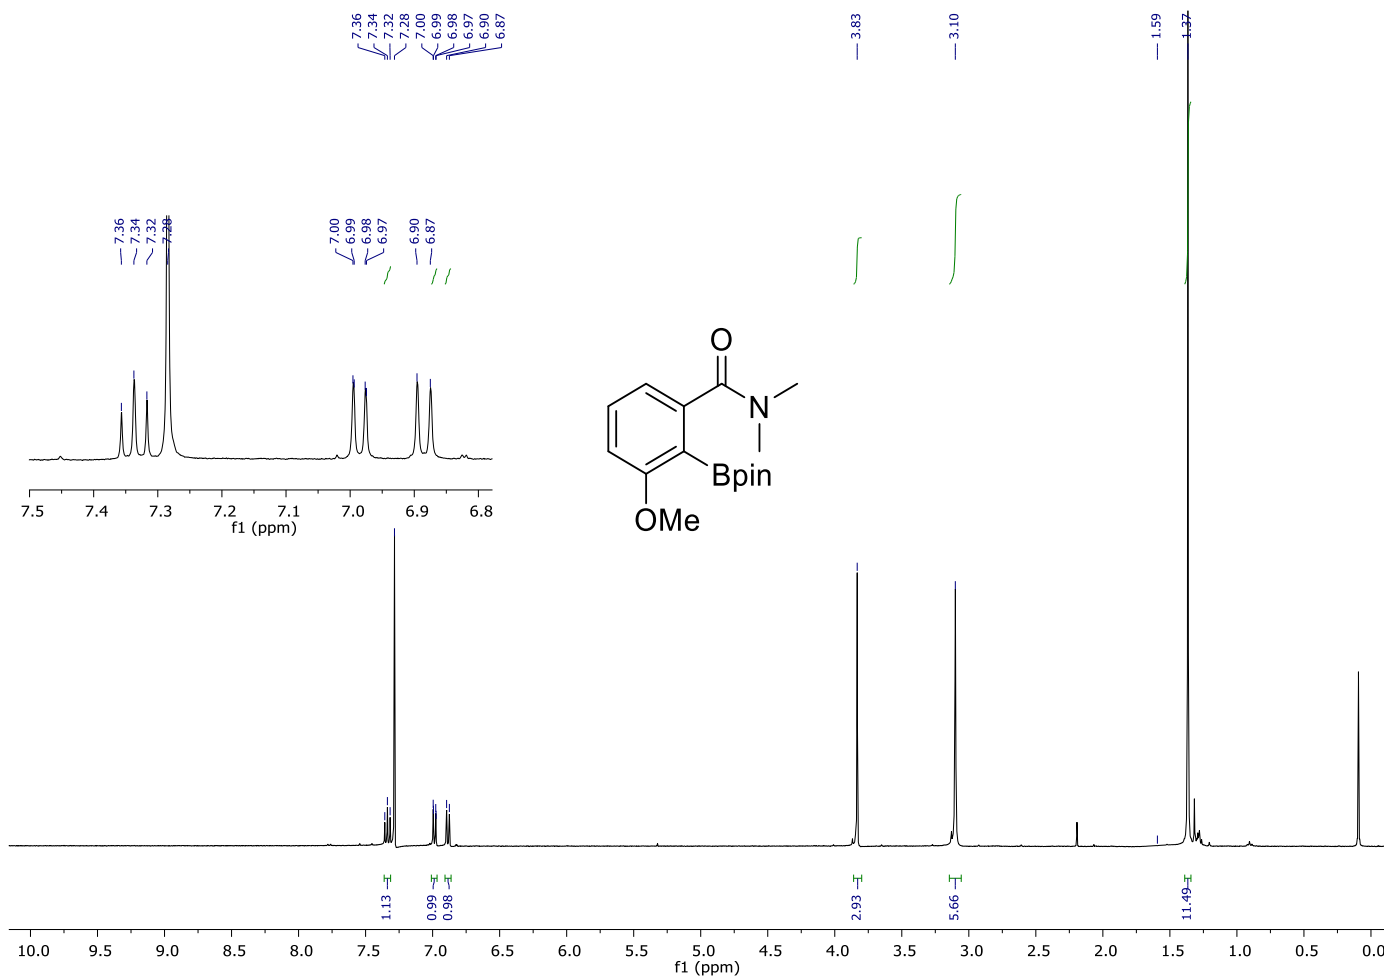

<sup>1</sup>H NMR (CDCl<sub>3</sub>, 400 MHz) spectrum of **2m**.

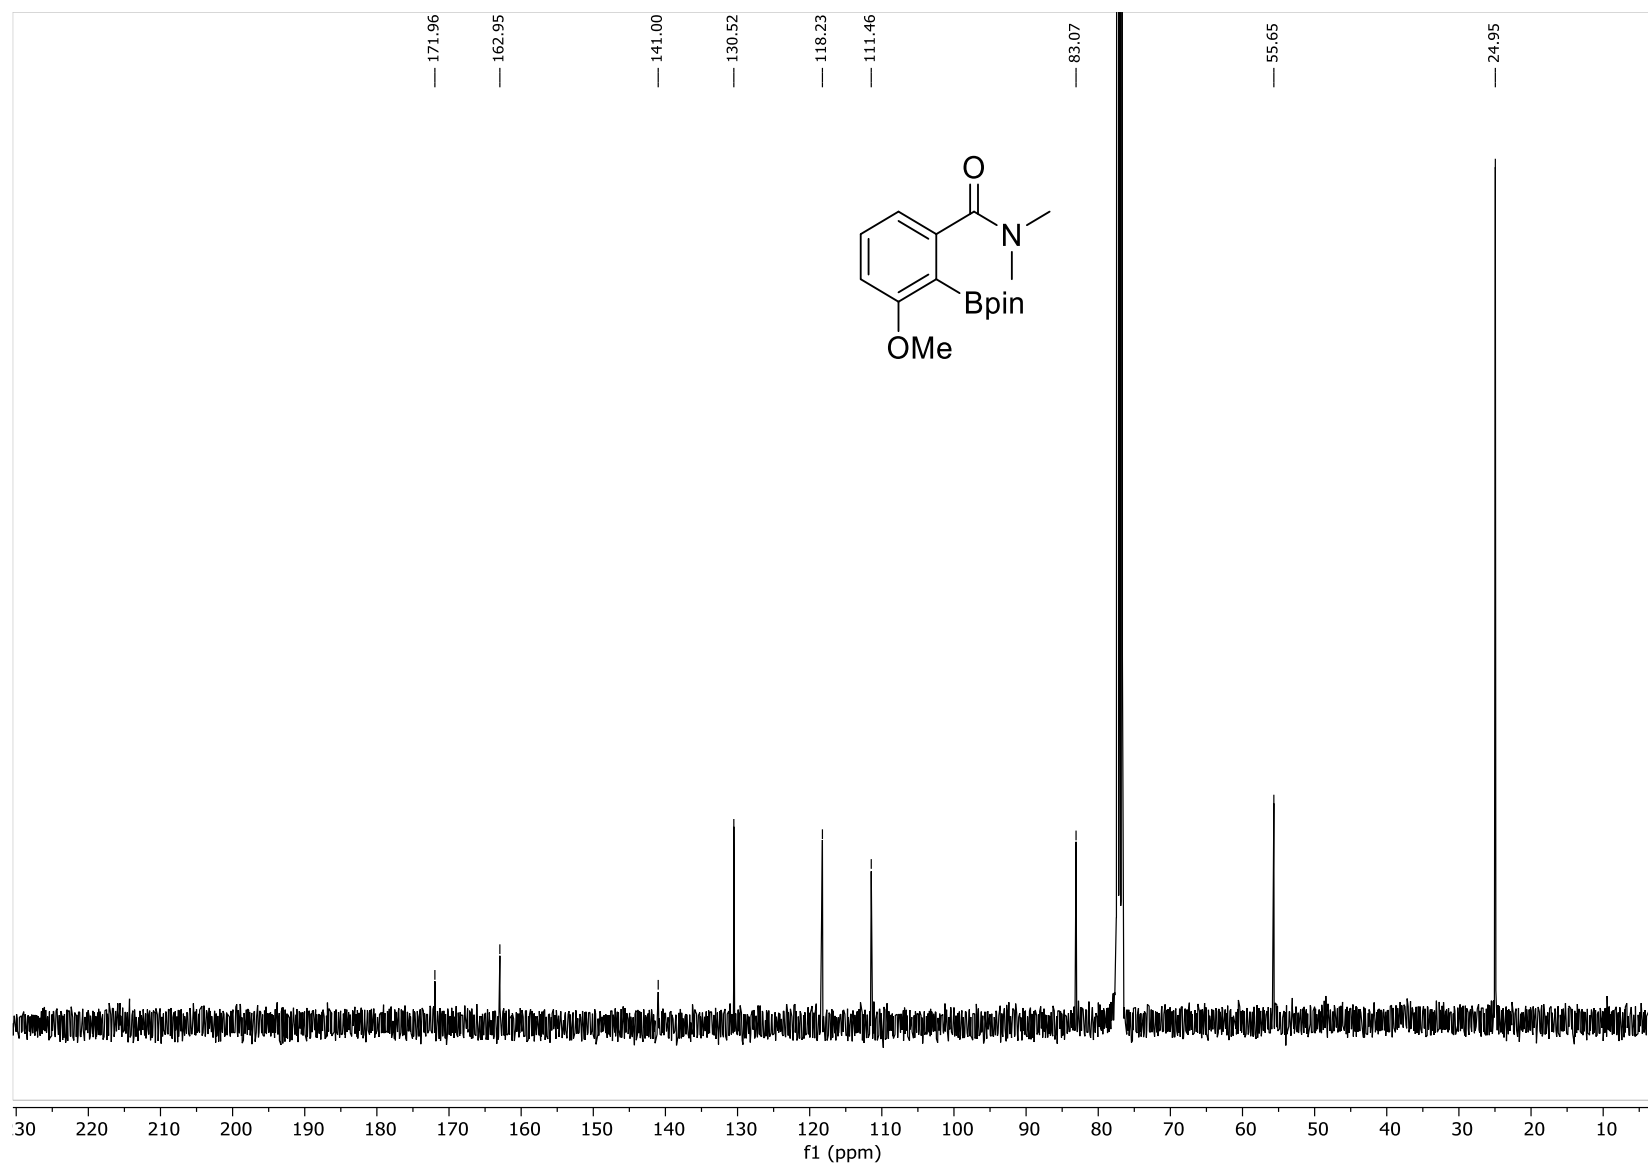

$^{13}\text{C}\{^1\text{H}\}$  NMR (CDCl<sub>3</sub>, 101 MHz) spectrum of **2m**.

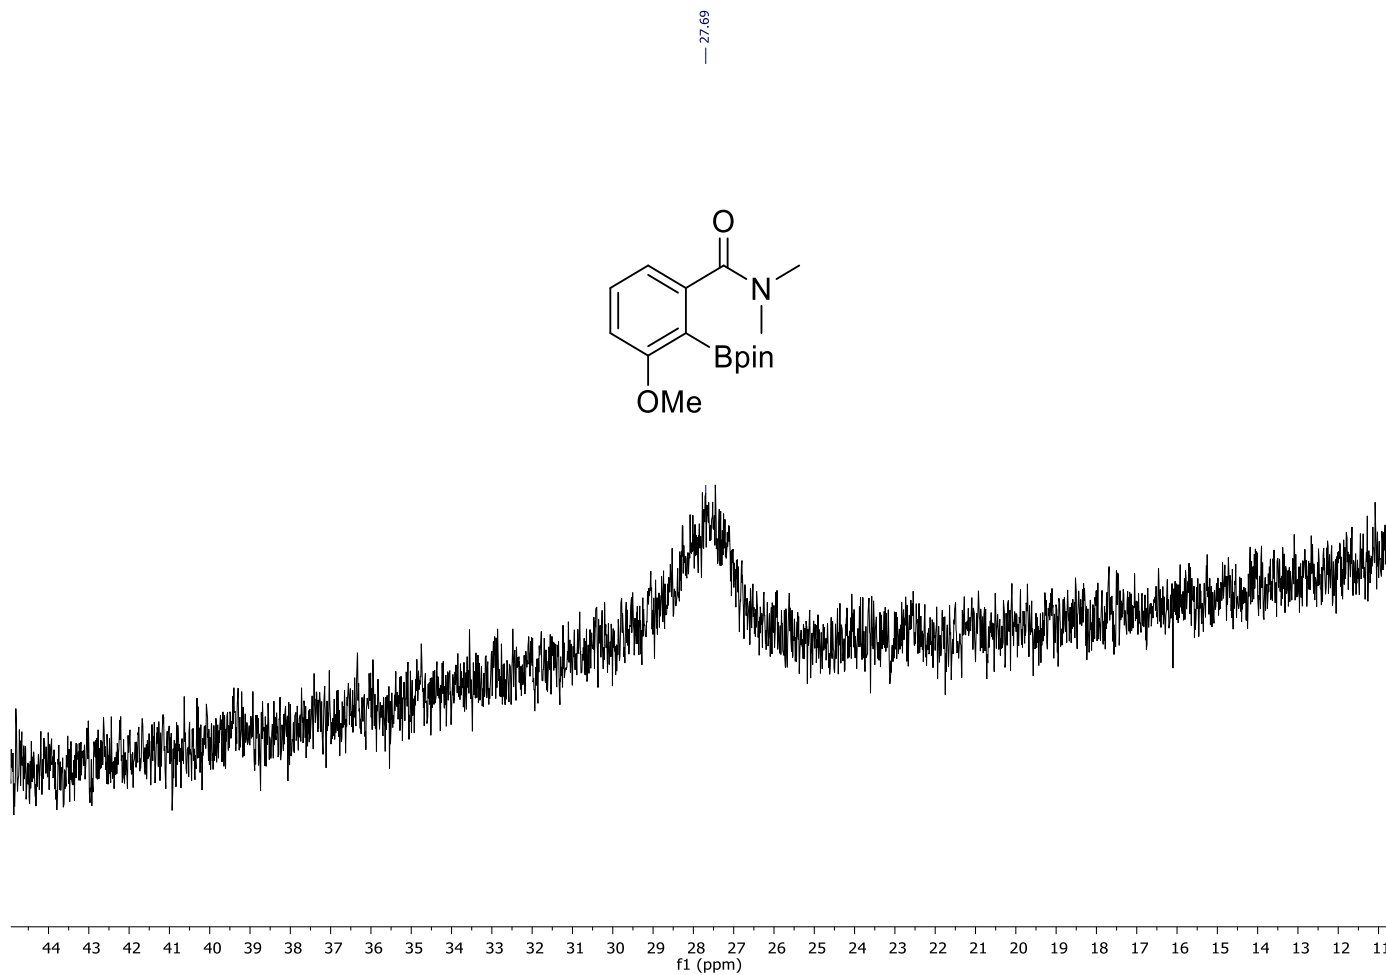

$^{11}\text{B}\{^1\text{H}\}$  NMR ( $\text{CDCl}_3$ , 128 MHz) spectrum spectrum of **2m**.

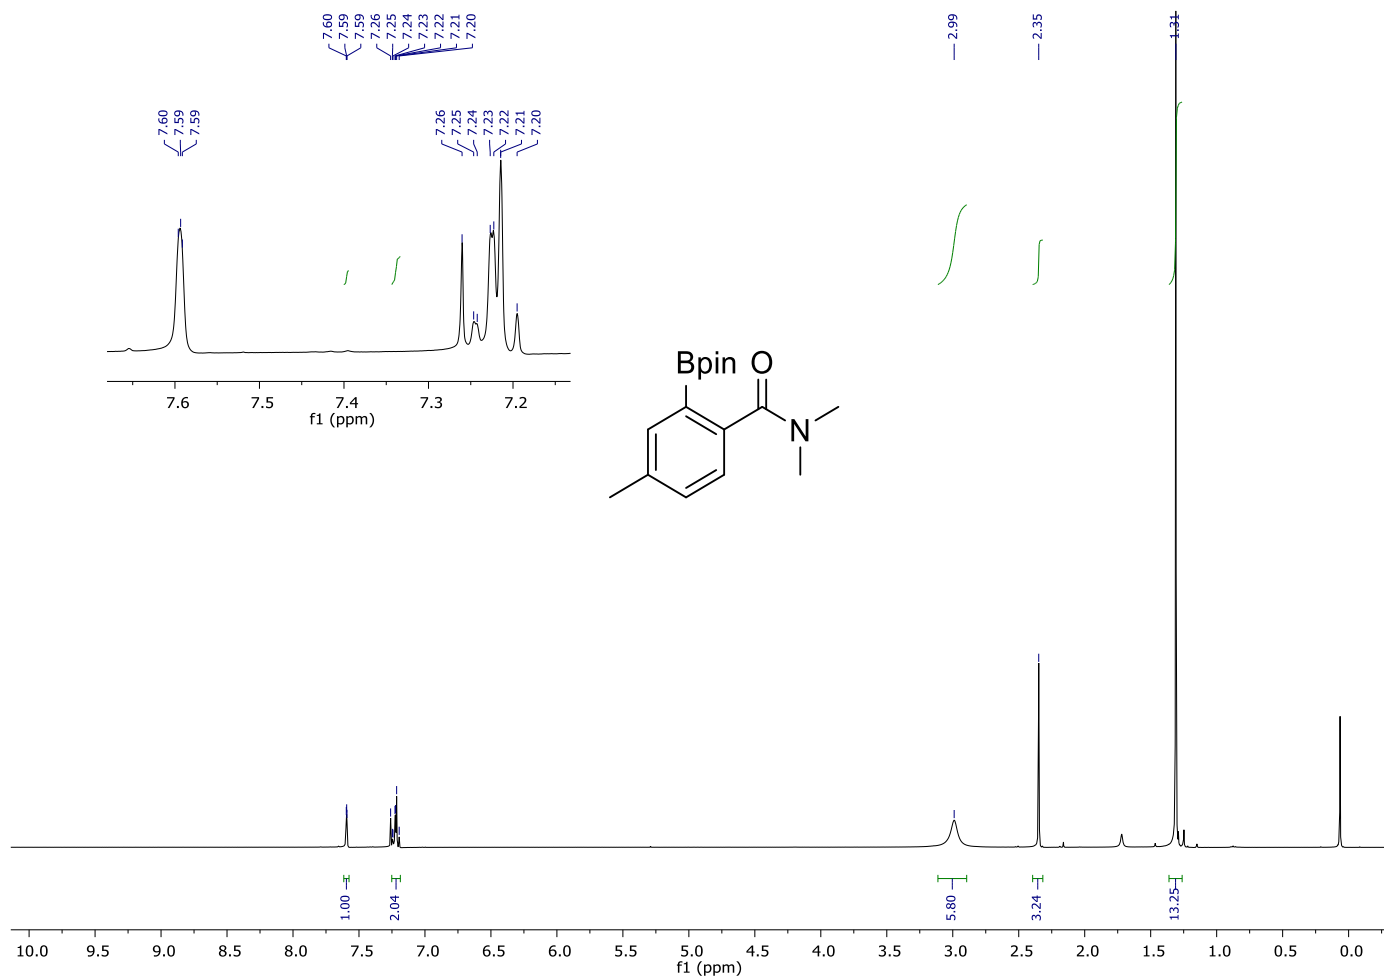

$^1\text{H}$  NMR ( $\text{CDCl}_3$ , 400 MHz) spectrum of **2n**.

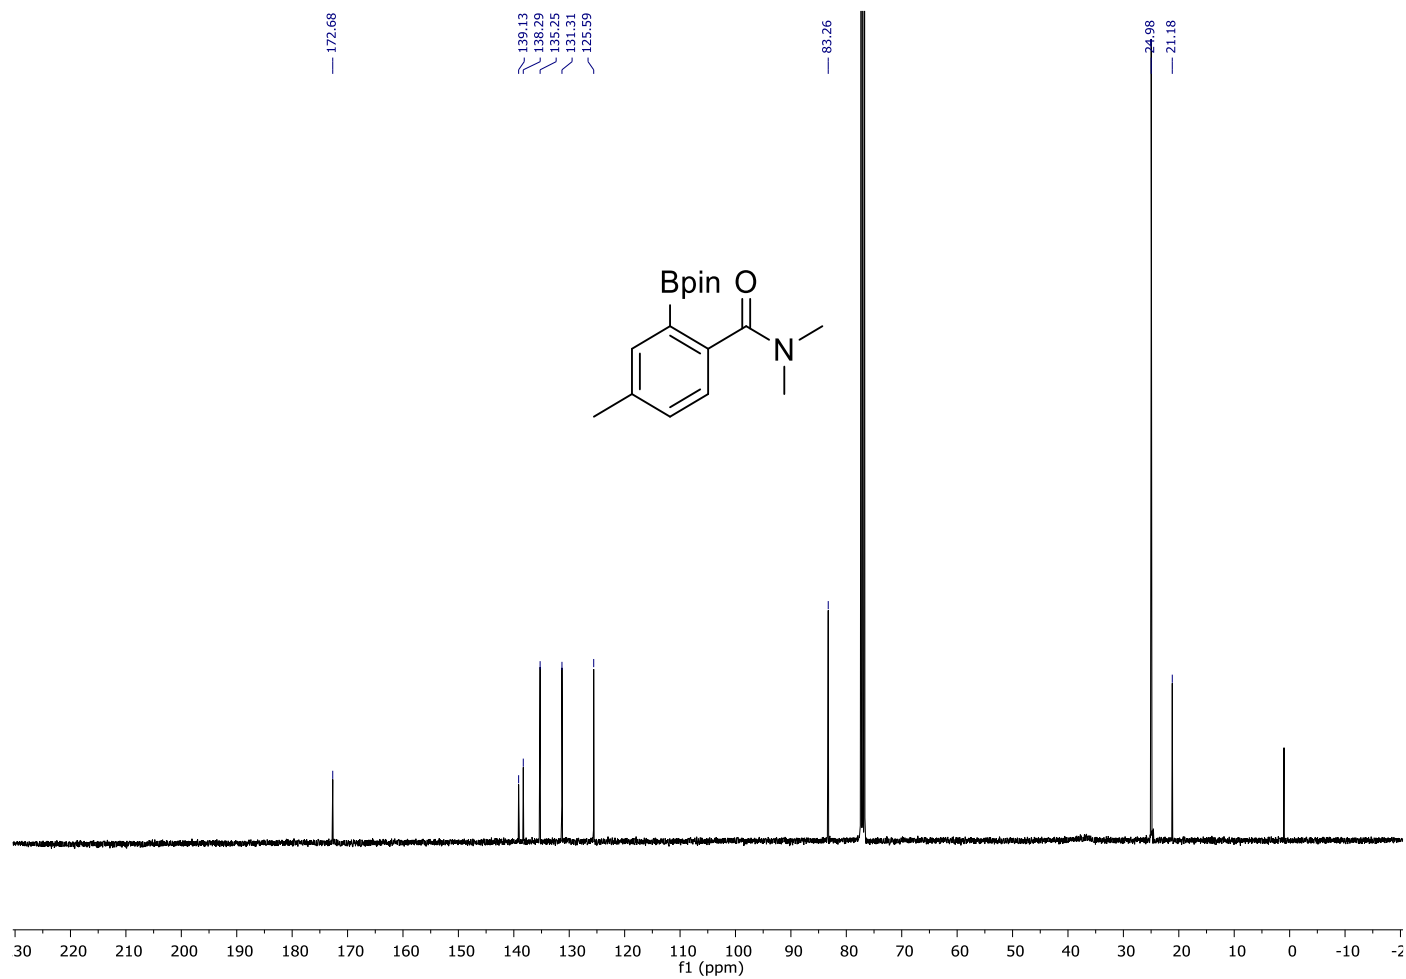

$^{13}\text{C}\{^1\text{H}\}$  NMR (CDCl<sub>3</sub>, 101 MHz) spectrum of **2n**.

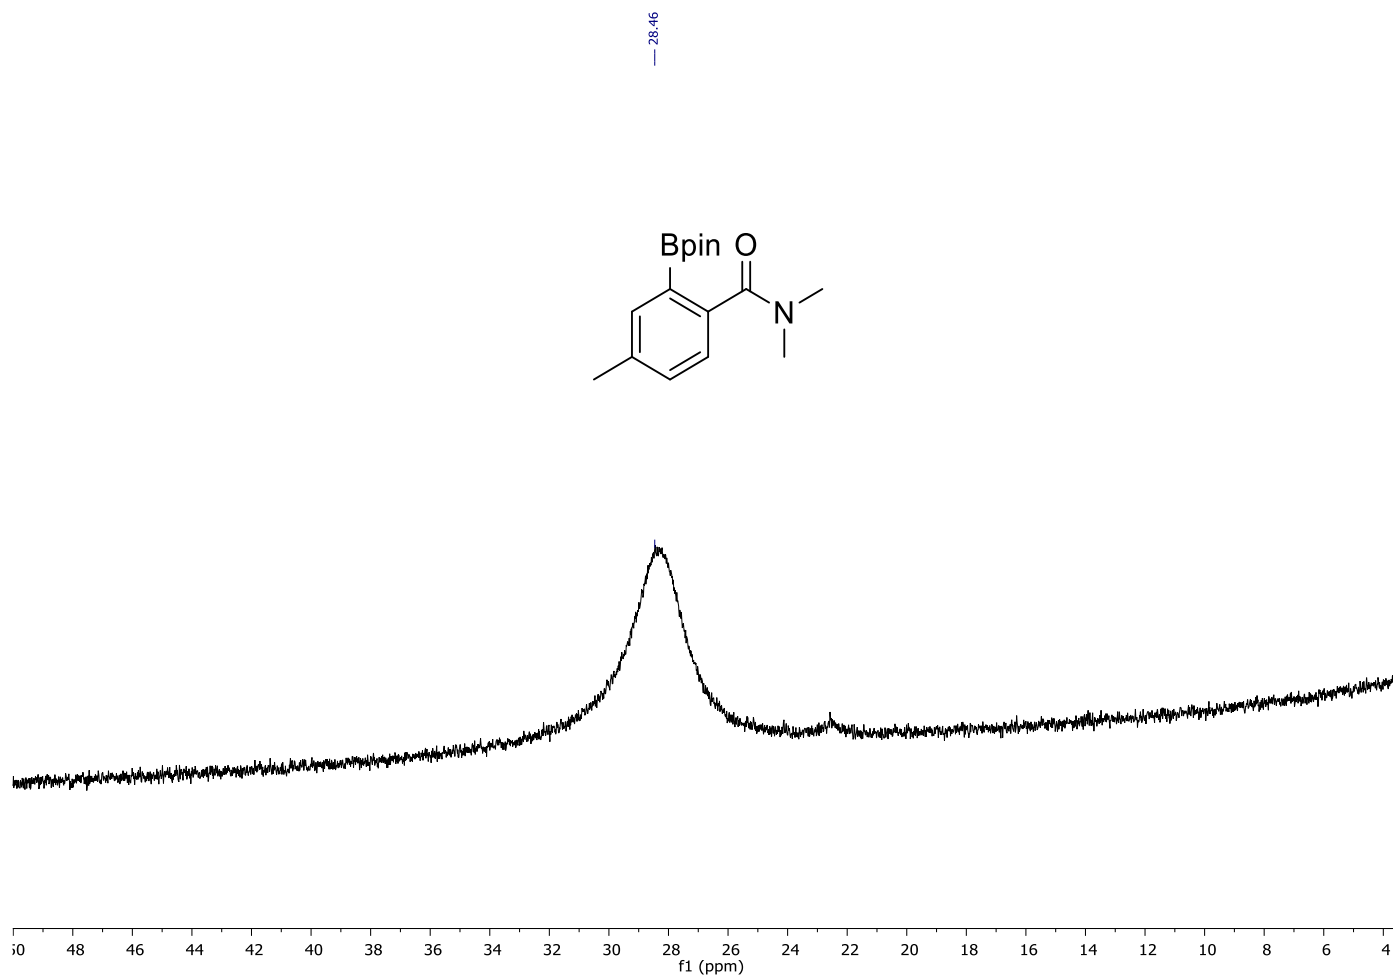

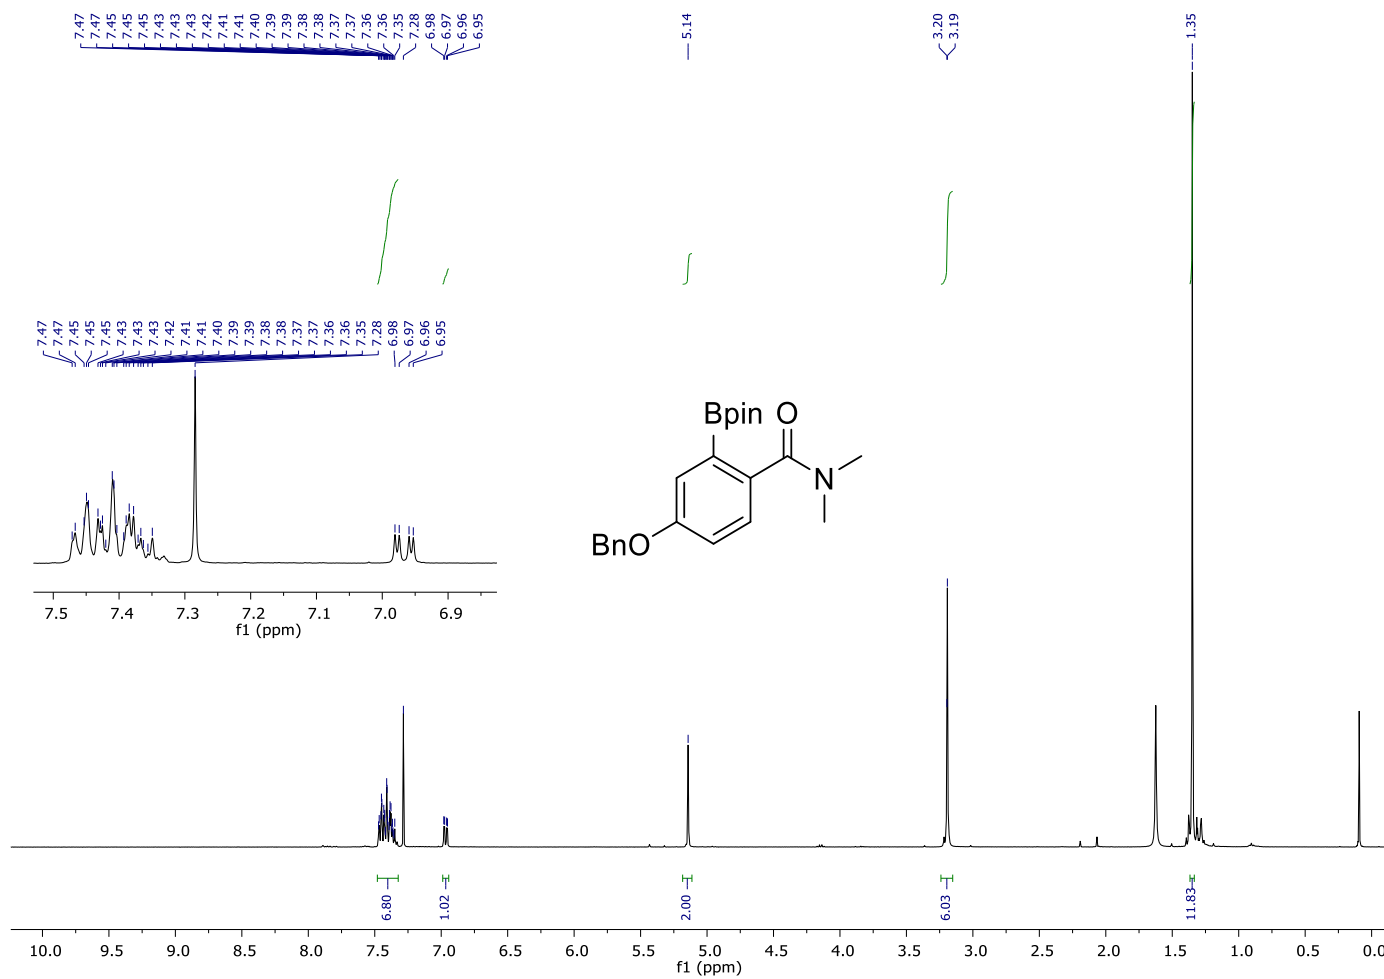

<sup>1</sup>H NMR (CDCl<sub>3</sub>, 400 MHz) spectrum of **2o**.

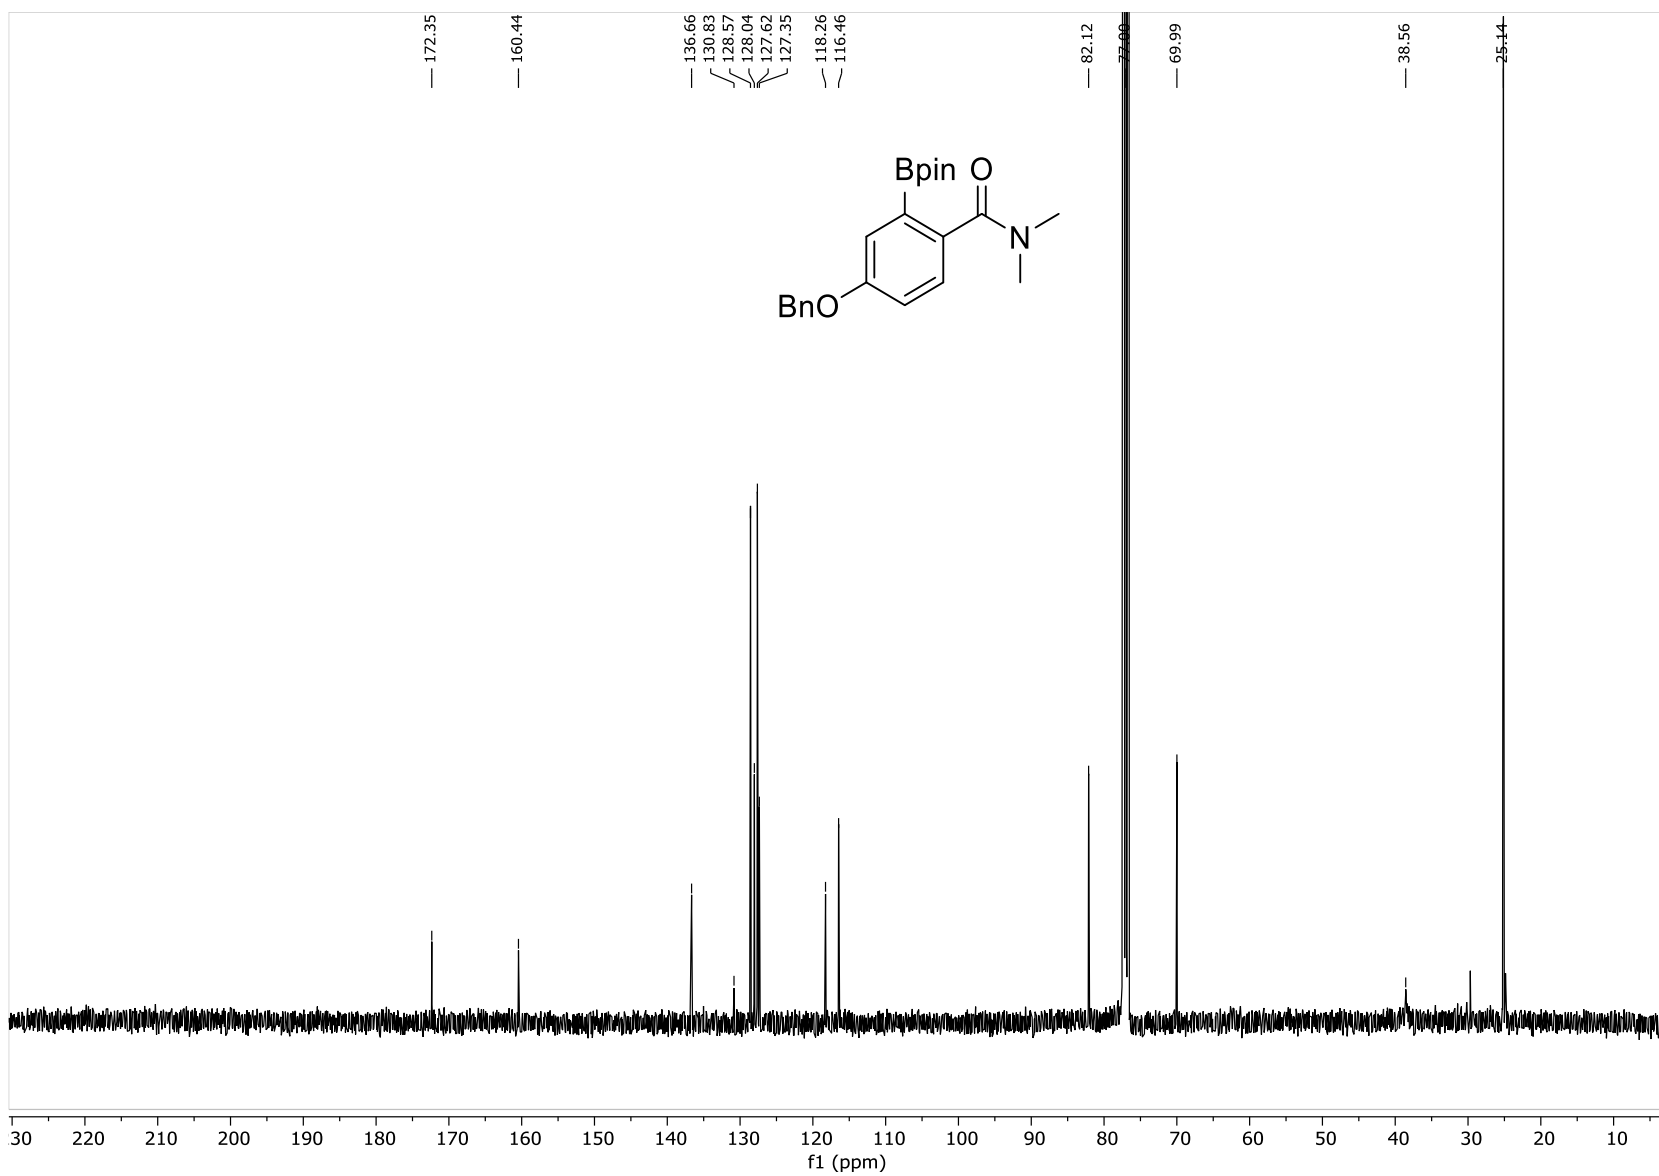

$^{13}\text{C}\{^1\text{H}\}$  NMR (CDCl<sub>3</sub>, 101 MHz) spectrum of **2o**.

S-173

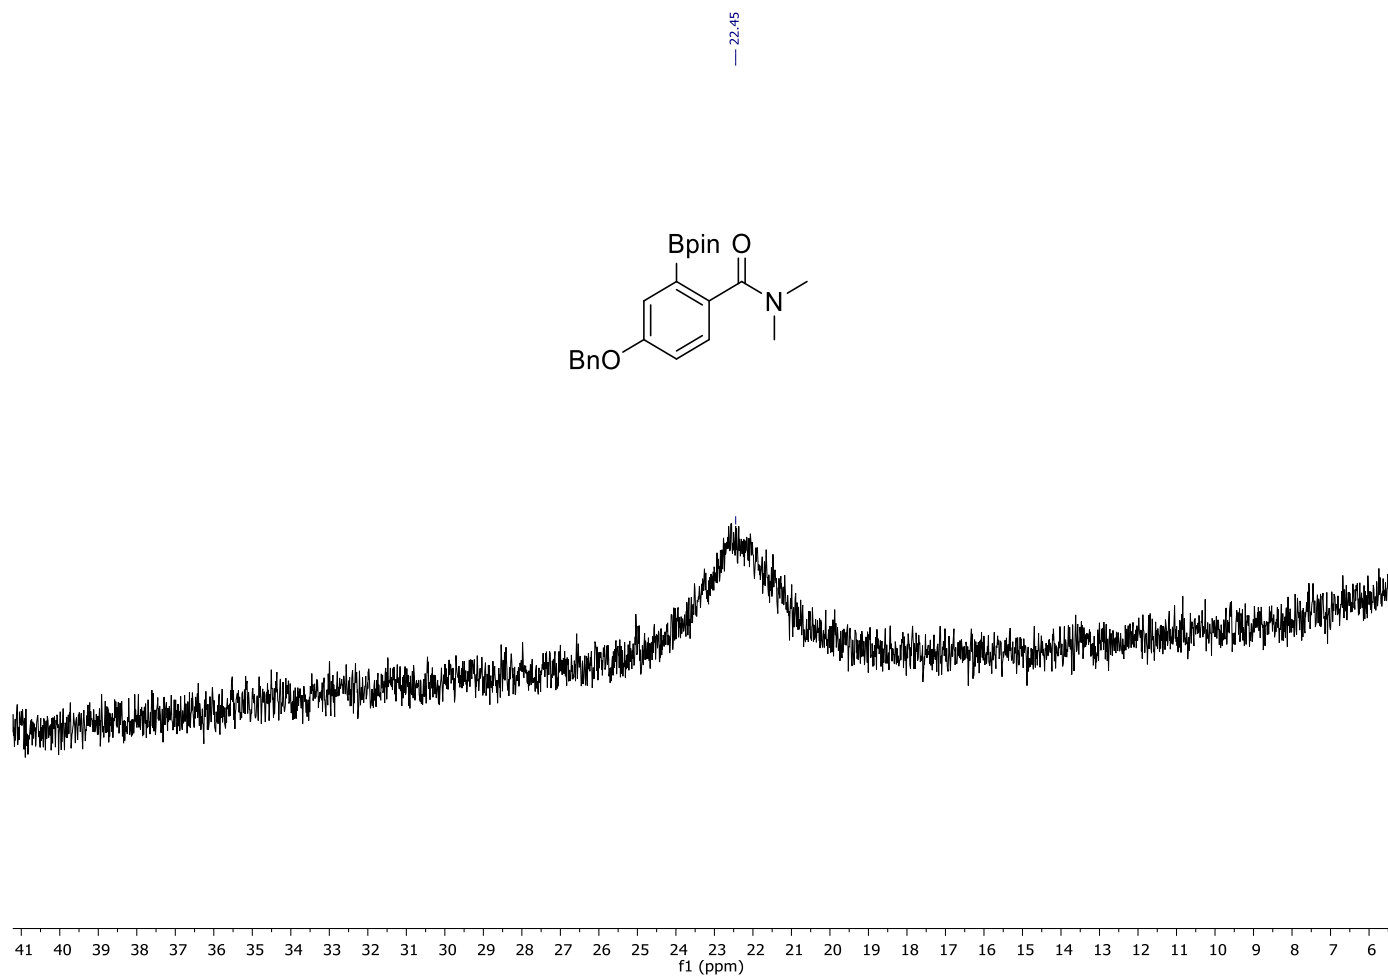



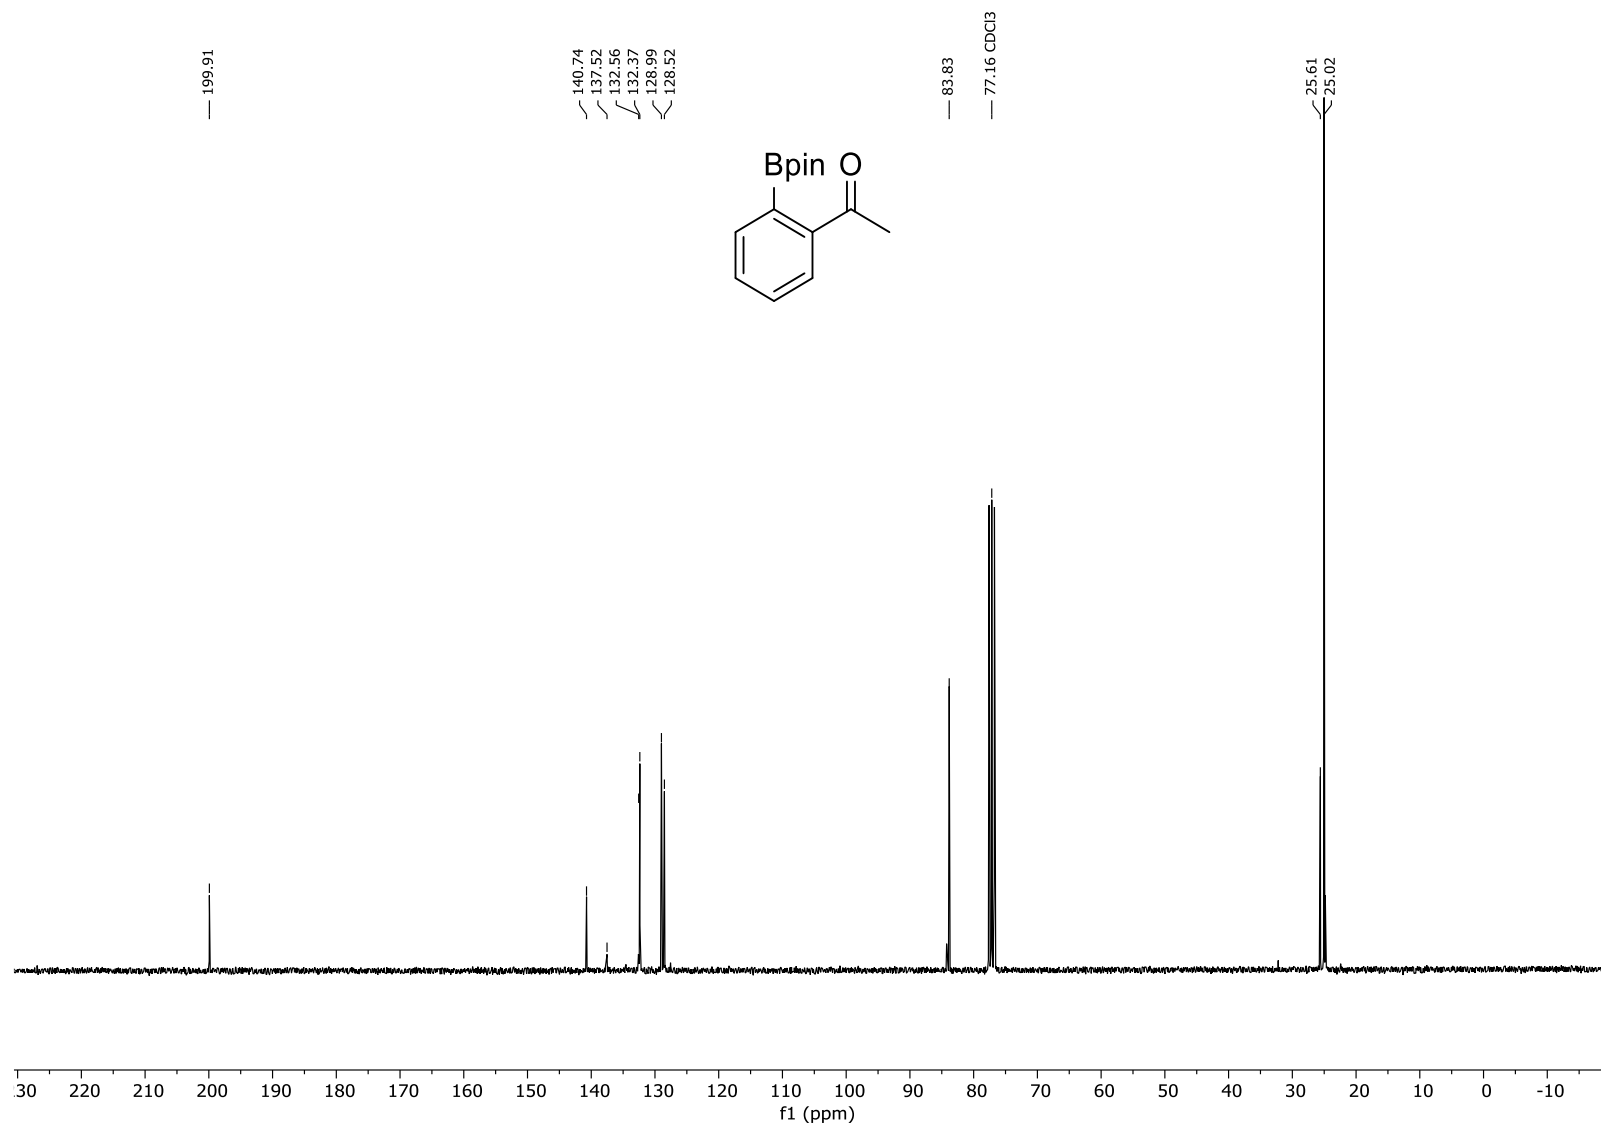

$^{13}\text{C}\{^1\text{H}\}$  NMR (CDCl<sub>3</sub>, 101 MHz) spectrum of **2p**.

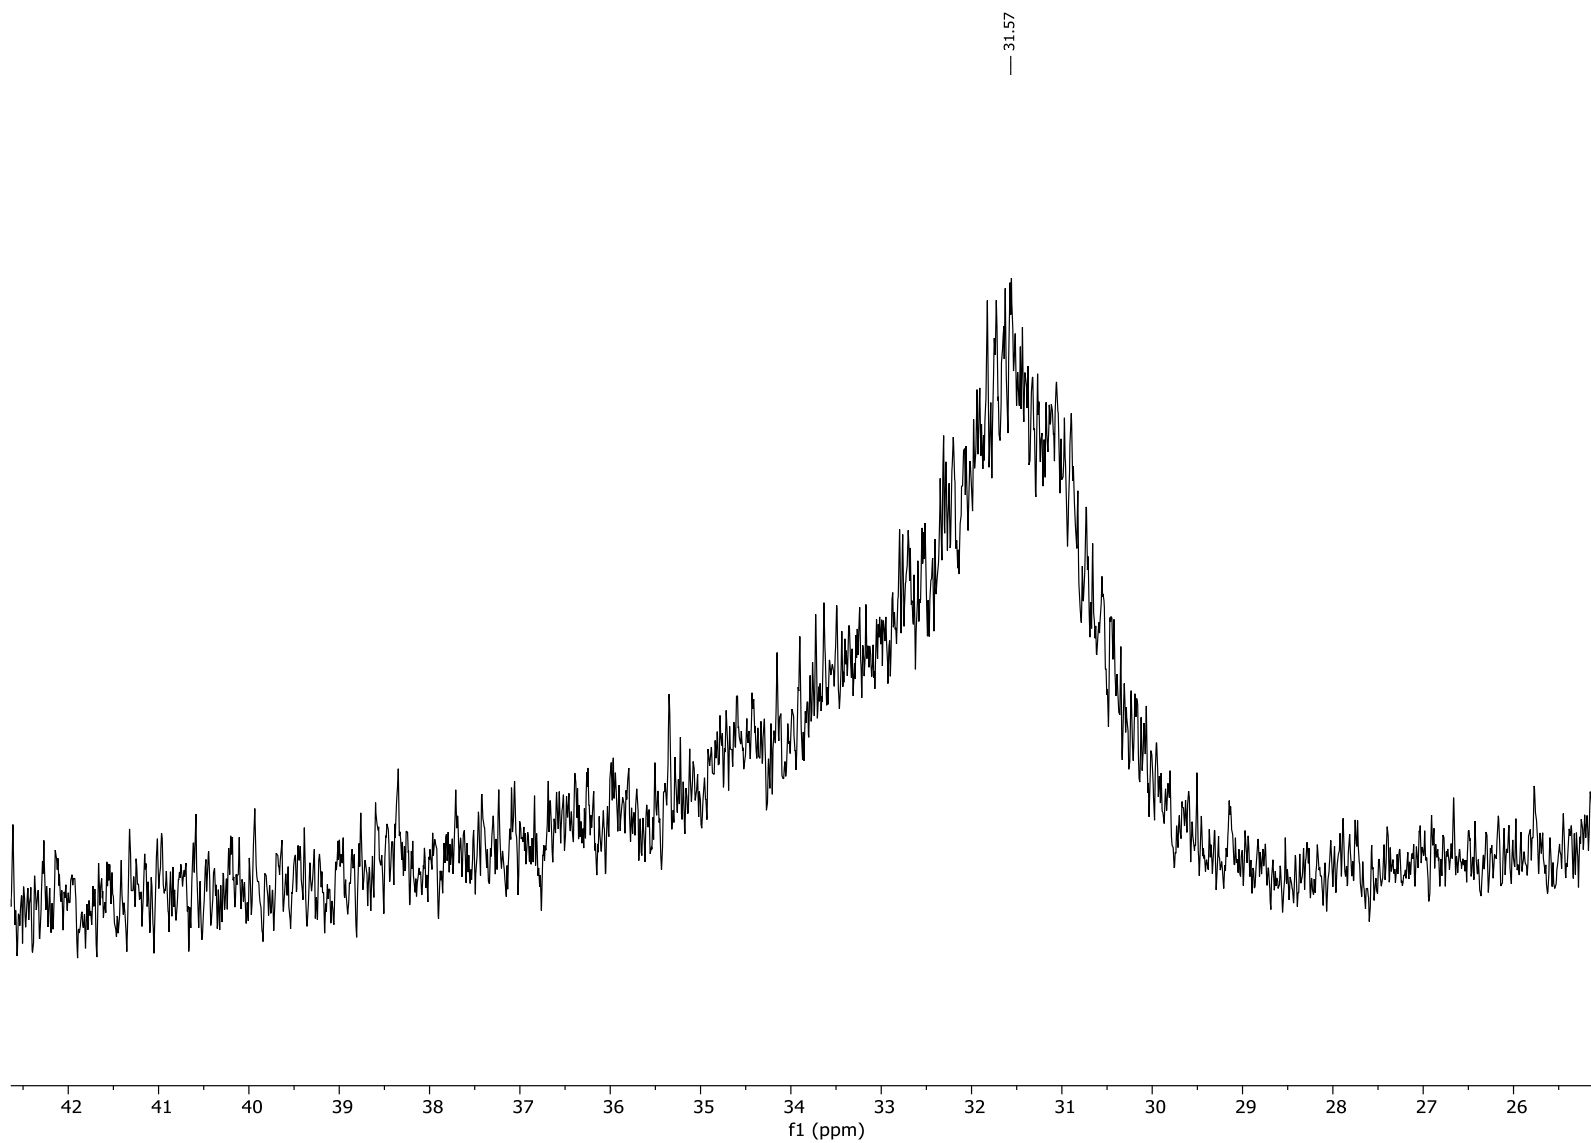

$^{11}\text{B}\{^1\text{H}\}$  NMR ( $\text{CDCl}_3$ , 128 MHz) spectrum spectrum of **2p**.

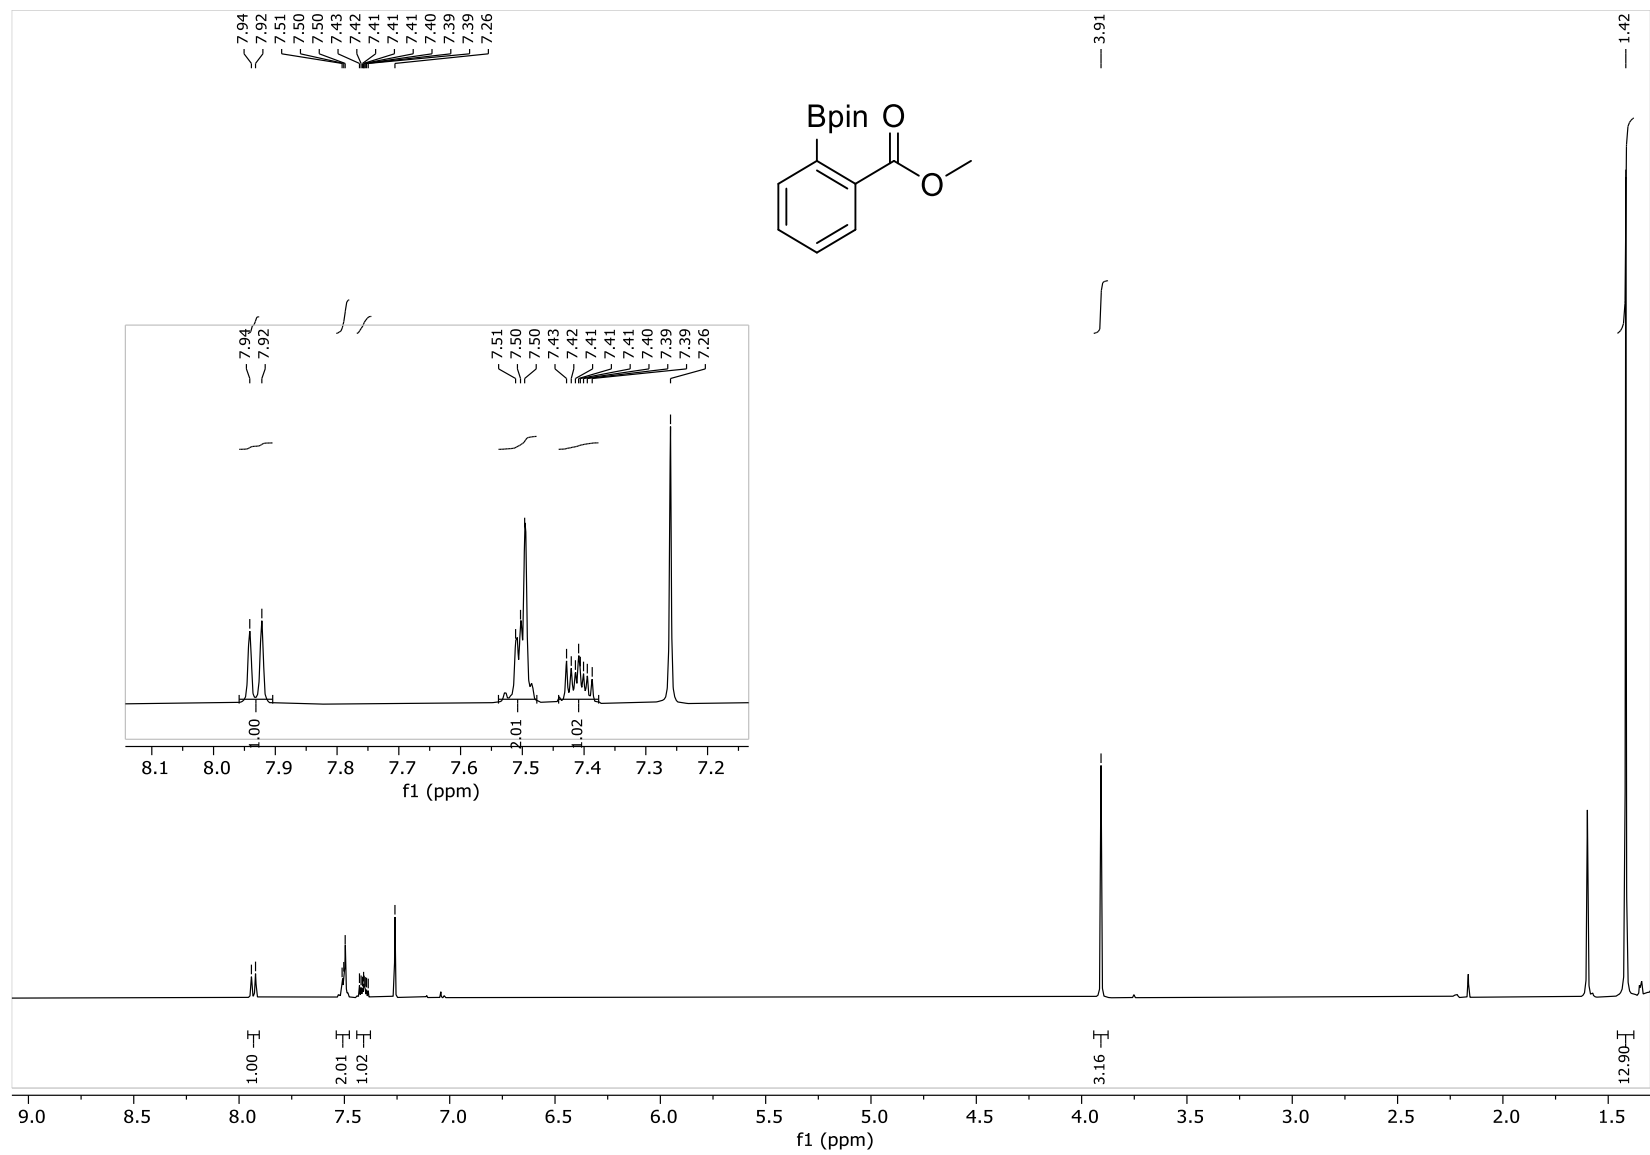

<sup>1</sup>H NMR (CDCl<sub>3</sub>, 400 MHz) spectrum of **2q**.

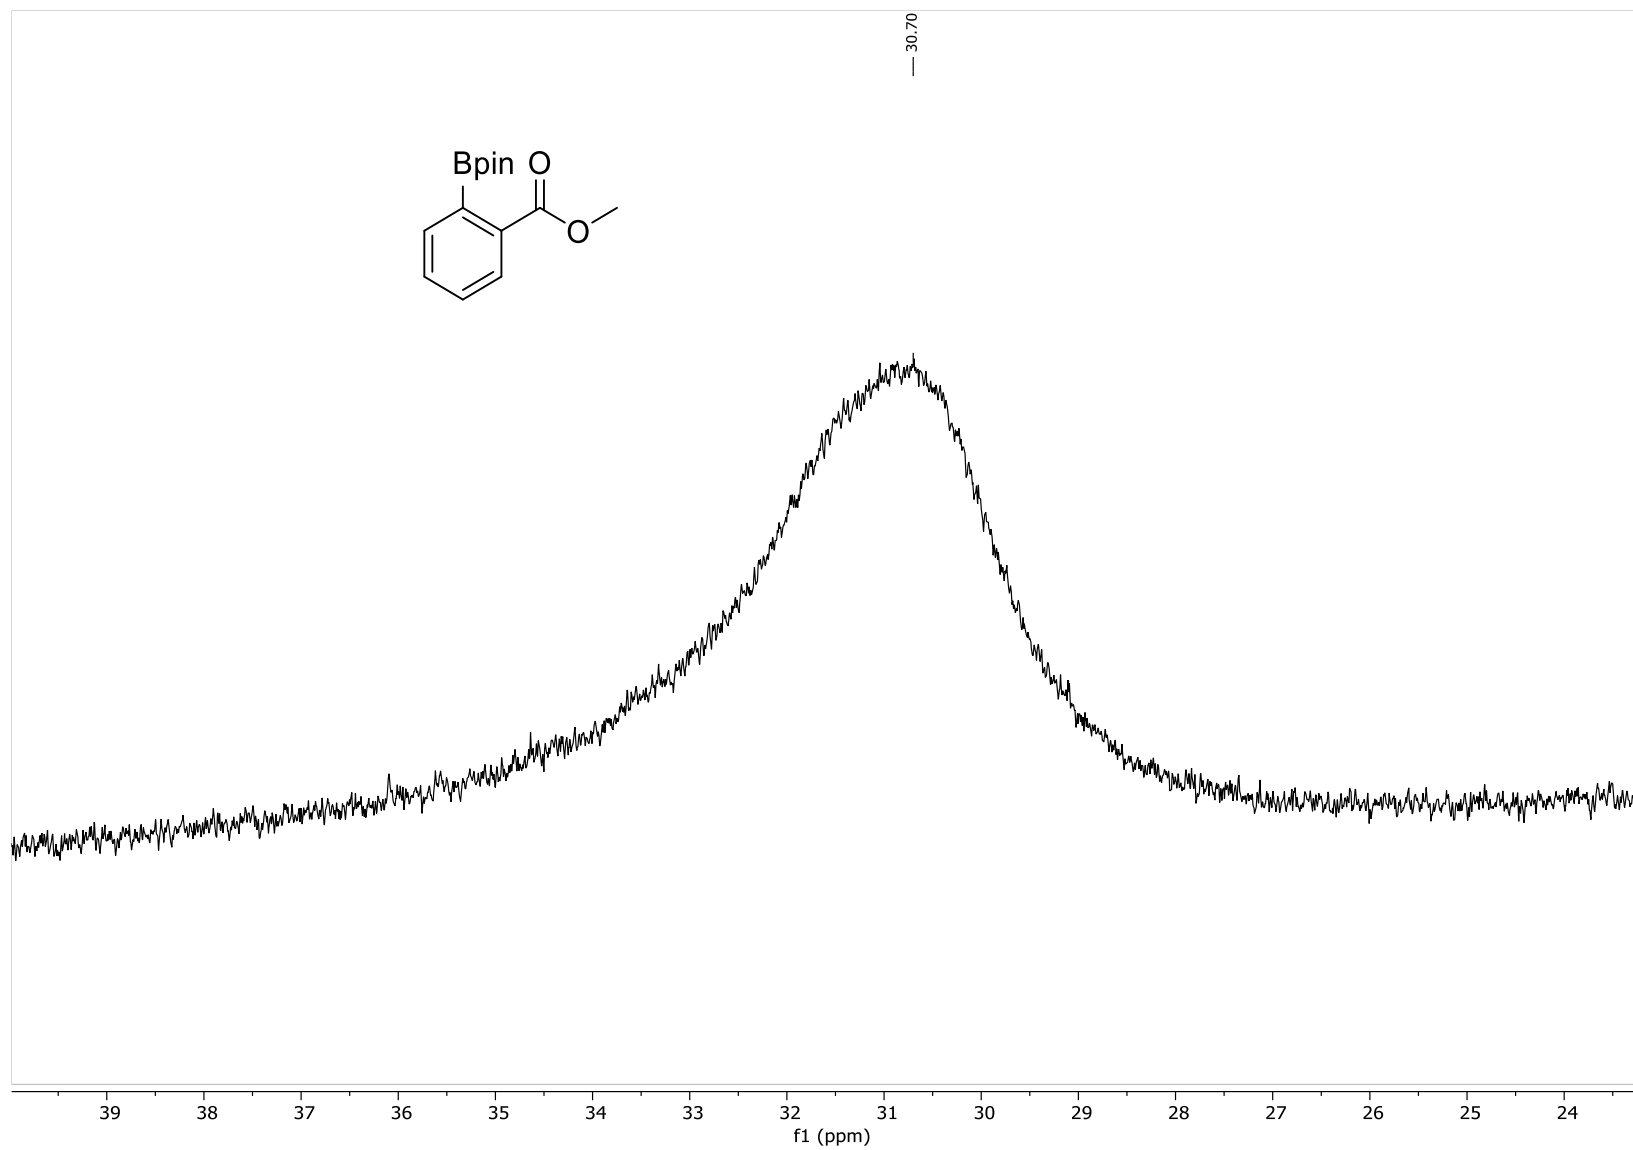

$^{11}\text{B}\{^1\text{H}\}$  NMR ( $\text{CDCl}_3$ , 128 MHz) spectrum spectrum of **2q**.

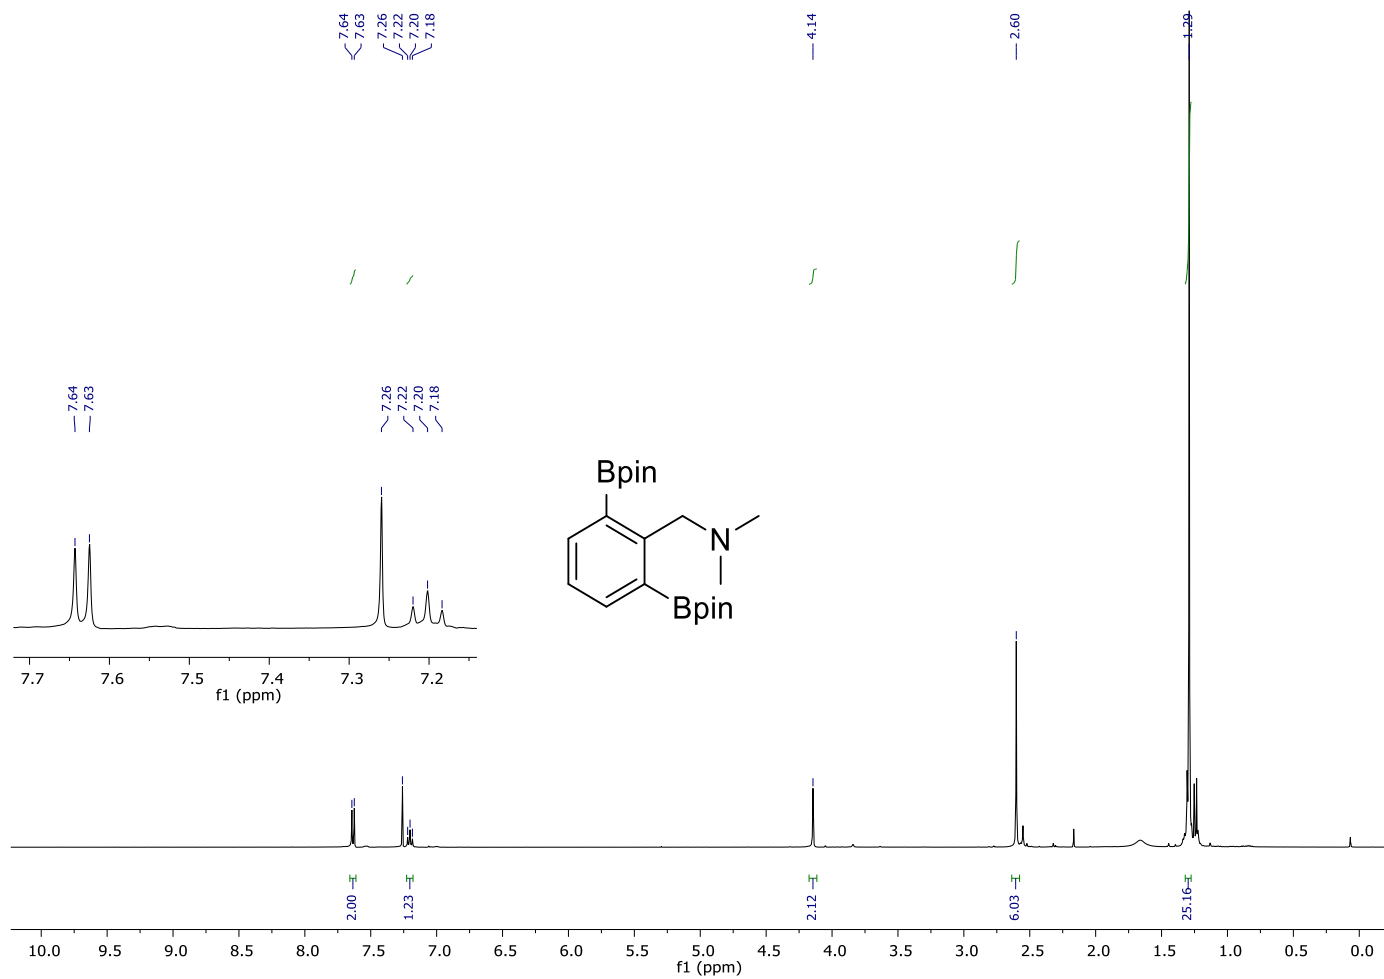

<sup>1</sup>H NMR (CDCl<sub>3</sub>, 400 MHz) spectrum of **5**.

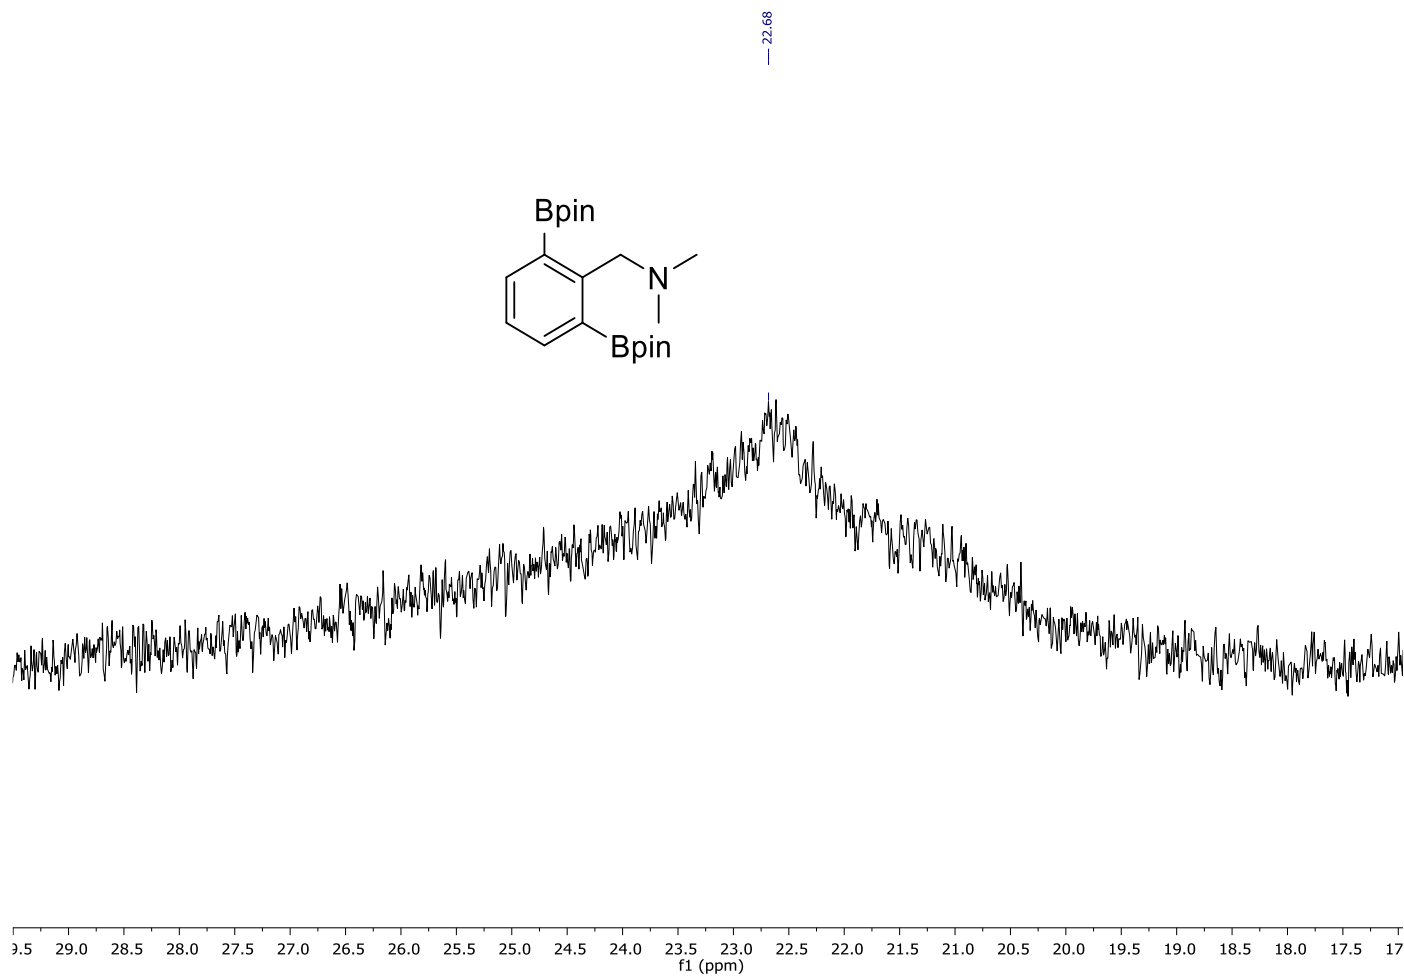

$^{11}\text{B}\{^1\text{H}\}$  NMR ( $\text{CDCl}_3$ , 128 MHz) spectrum spectrum of **5**.
